# Supplementary material for: Dual-functionalized architecture enables stable and tumor cell-specific SiO 2 NPs in complex biological fluids
Source: publisher site journal article supplement (doi:10.3762/bjnano.15.100), 2024-10-07
Supplement: Additional file 1 [file 2190-4286-15-100-S1.pdf]

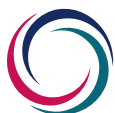

## Supporting Information

for

### **Dual-functionalized architecture enables stable and tumor cell-specific SiO<sub>2</sub>NPs in complex biological fluids**

Iris Renata Sousa Ribeiro, Raquel Frenedoso da Silva, Romênia Ramos Domingues, Adriana Franco Paes Leme and Mateus Borba Cardoso

*Beilstein J. Nanotechnol.* **2024**, *15*, 1238–1252. doi:10.3762/bjnano.15.100

## Additional figures and tables

## 1. Characterization of ZW

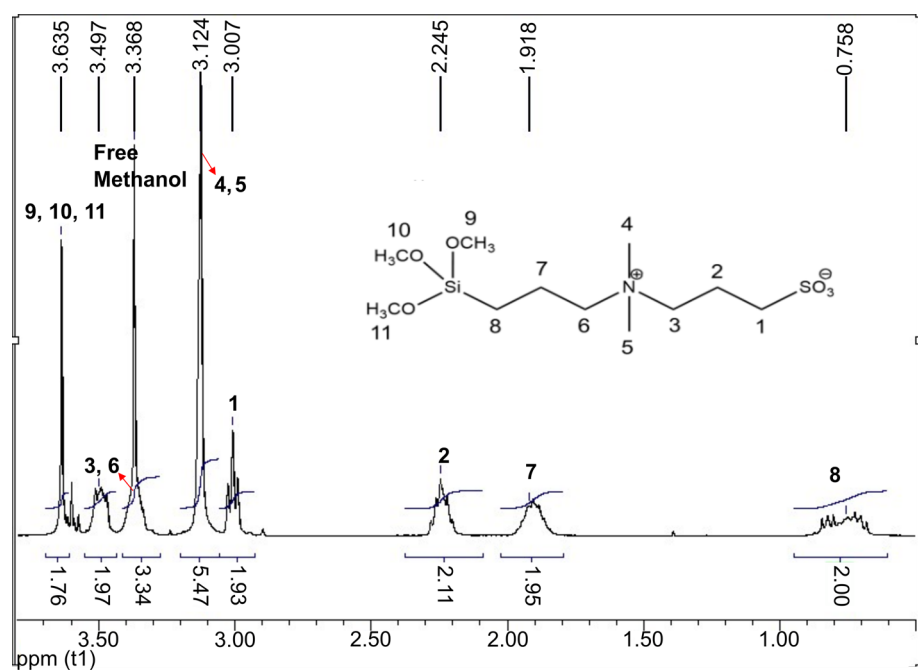

**Figure S1:**  $^1\text{H}$  NMR spectrum for ZW compound. Band assignments are included in the spectrum.

## 2. Chemical Structures

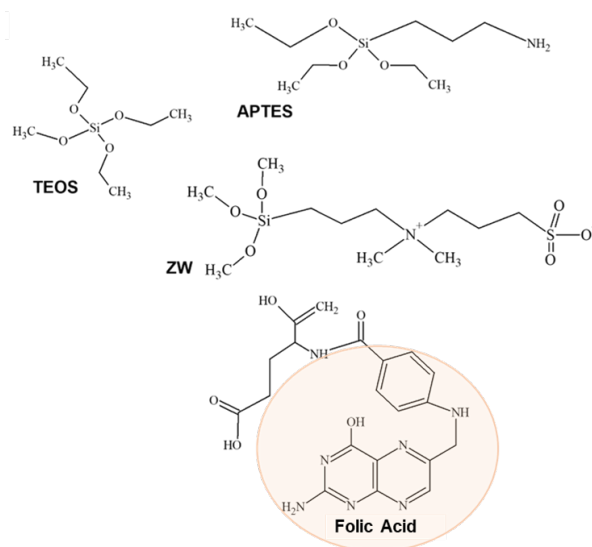

**Figure S2:** Chemical structures of the main compounds used for the synthesis and functionalization of SiO<sub>2</sub>NPs. In the structure of folic acid, the region that will be recognized by the folate receptor is highlighted.

### 3. Immunoprecipitation assay

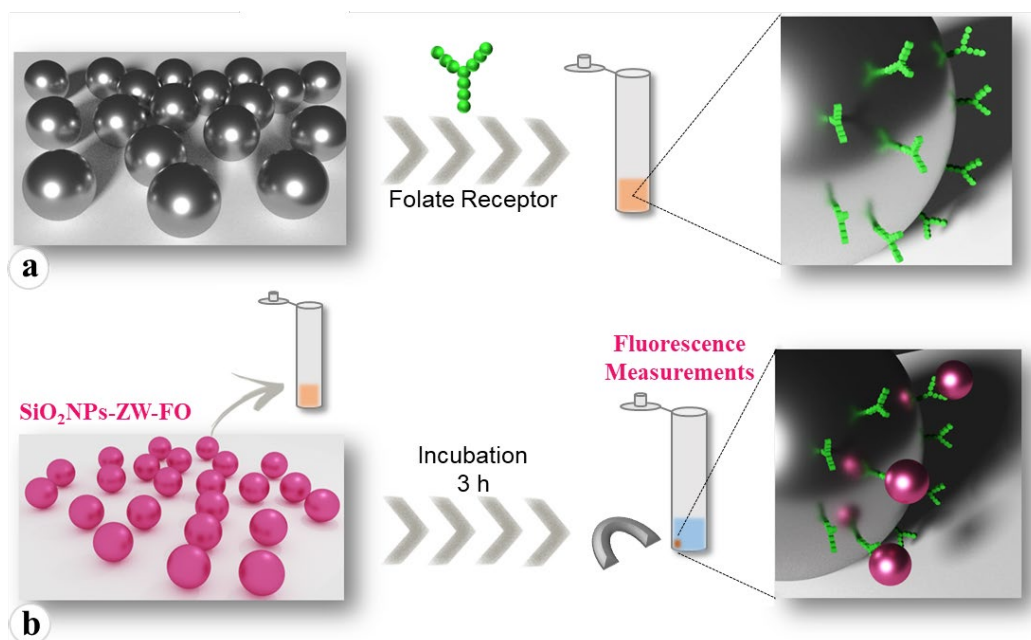

**Figure S3:** Schematic representation of the magnetic beads preparation for immunoprecipitation assay. Briefly, the beads are modified with a) the folate receptor and subsequently exposed to b) SiO<sub>2</sub>NPs and SiO<sub>2</sub>NPs-ZW-FO. After incubation, measurements are performed using the fluorescence technique.

## 4. Nanoparticle characterization

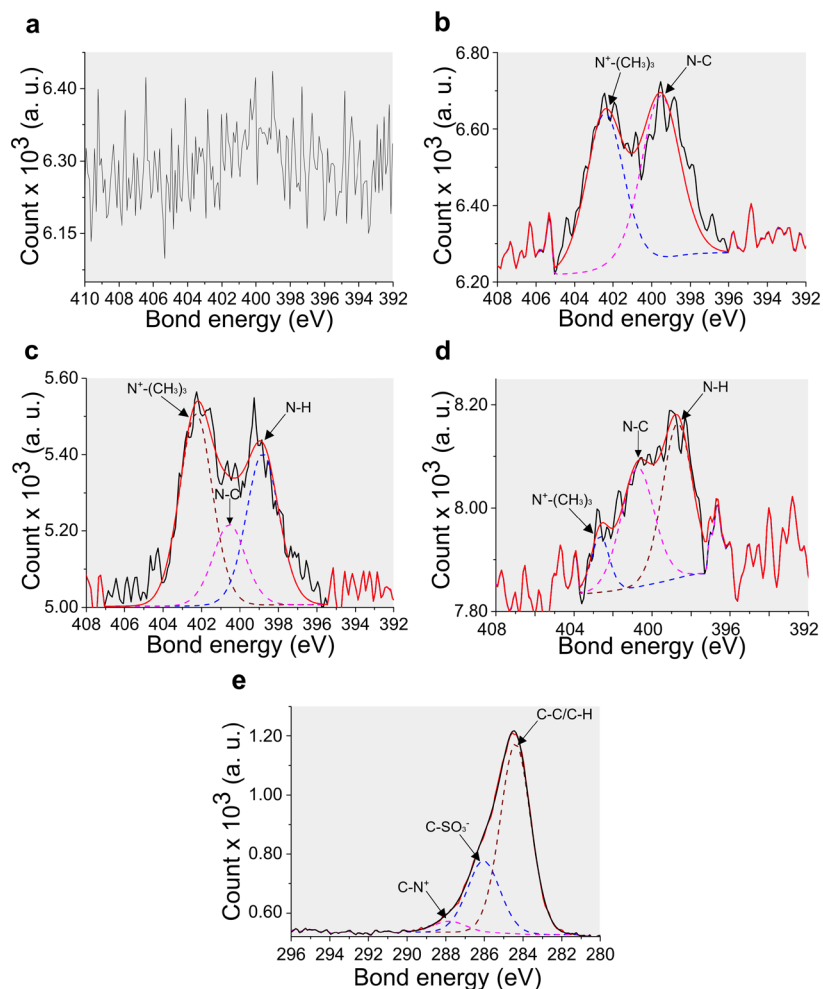

**Figure S4:** High resolution XPS spectrum (N 1s) for a) SiO<sub>2</sub>NPs, b) SiO<sub>2</sub>NPs-ZW, c) SiO<sub>2</sub>NPs-ZW-NH<sub>2</sub>, d) SiO<sub>2</sub>NPs-ZW-FO. High resolution XPS spectrum (C 1s) for e) SiO<sub>2</sub>NPs-ZW-NH<sub>2</sub>. The main peaks for each sample are marked on the spectrum itself.

## 5. Nanoparticle characterization

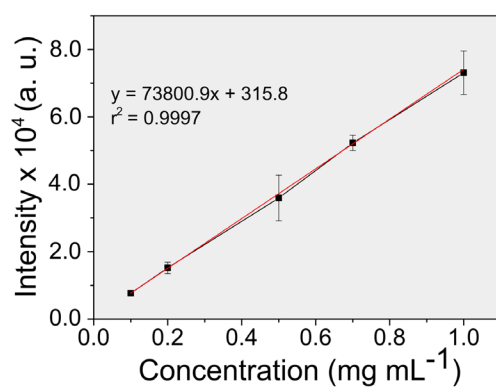

**Figure S5:** Analytical curve showing fluorescence responses as a function of SiO<sub>2</sub>NPs concentration (0.1, 0.2, 0.5, 0.7 and 1.0 mg·mL<sup>-1</sup>).

## 6. Protein corona formation

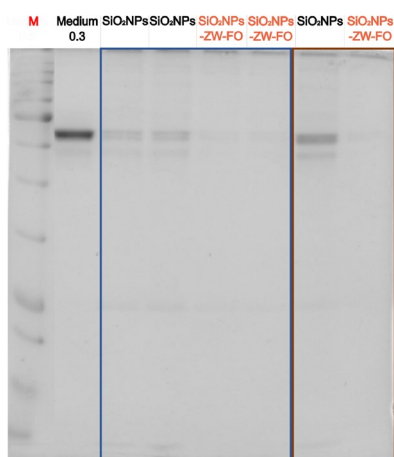

**Figure S6:** Polyacrylamide gel electrophoresis of non-functionalized and functionalized SiO<sub>2</sub>NPs samples after incubation in DMEM medium (10% FBS). The concentrations of SiO<sub>2</sub>NPs (functionalized and non-functionalized) used were 2 mg·mL<sup>-1</sup> (samples delimited by the blue square, duplicates for each sample) and 5 mg·mL<sup>-1</sup> (samples delimited by the orange square). DMEM medium (10% FBS) was also used for control without NPs at 0.3 dilution. Lane M is a protein marker.

## 7. Protein corona composition

**Table S1:** 20 Most abundant proteins identified in DMEM and hard corona of SiO<sub>2</sub>NPs, SiO<sub>2</sub>NPs-ZW, and SiO<sub>2</sub>NPs-ZW-FO in descending order.

| DMEM                                         | SiO <sub>2</sub> NPs                         | SiO <sub>2</sub> NPs-ZW              | SiO <sub>2</sub> NPs-ZW-FO                   |
|----------------------------------------------|----------------------------------------------|--------------------------------------|----------------------------------------------|
| Albumin                                      | Complement C3                                | Albumin                              | Albumin                                      |
| Alpha-1-antiproteinase                       | Hemoglobin fetal subunit beta                | Trypsin                              | Similar to complement C4-A precursor         |
| Alpha-2-HS-glycoprotein                      | Apolipoprotein A-I                           | Gelsolin                             | Apolipoprotein A-I                           |
| Serotransferrin                              | Albumin                                      | Similar to complement C4-A precursor | Trypsin                                      |
| Alpha-2-macroglobulin                        | Hemoglobin subunit alpha                     | Hemoglobin fetal subunit beta        | Alpha-2-HS-glycoprotein                      |
| Hemoglobin fetal subunit beta                | Alpha-1-antiproteinase                       | Alpha-2-HS-glycoprotein              | Gelsolin                                     |
| Fetuin-B                                     | Gelsolin                                     | Apolipoprotein A-I                   | Hemoglobin fetal subunit beta                |
| Alpha-fetoprotein                            | Alpha-2-HS-glycoprotein                      | Complement C3                        | Complement C3                                |
| Vitamin D-binding protein                    | Similar to complement C4-A precursor         | Methanethiol oxidase                 | Hemoglobin subunit alpha                     |
| Complement C3                                | Trypsin                                      | Alpha-1-antiproteinase               | Alpha-1-antiproteinase                       |
| Hemoglobin subunit alpha                     | Complement factor B                          | Hemoglobin subunit alpha             | Tetranectin                                  |
| Apolipoprotein A-I                           | Alpha-2-macroglobulin                        | Complement factor H                  | Complement factor H                          |
| Trypsin                                      | Inter-alpha-trypsin inhibitor heavy chain H2 | Tetranectin                          | Kininogen-1                                  |
| Inter-alpha-trypsin inhibitor heavy chain H2 | Alpha-fetoprotein                            | Complement factor B                  | Alpha-2-macroglobulin                        |
| Hemopexin                                    | Plasminogen                                  | Alpha-2-macroglobulin                | Complement factor B                          |
| Methanethiol oxidase                         | Inter-alpha-trypsin inhibitor heavy chain H4 | Thrombospondin-1                     | Inter-alpha-trypsin inhibitor heavy chain H2 |
| Serpin A3-1                                  | Fetuin-B                                     | Plasminogen                          | Inter-alpha-trypsin inhibitor heavy chain H4 |
| Antithrombin-III                             | Actin                                        | Pigment epithelium-derived factor    | Thrombospondin-1                             |
| Similar to complement C4-A precursor         | Complement factor H                          | Plasminogen                          | Apolipoprotein E                             |
| Elongation factor 1-alpha                    | Apolipoprotein B-48                          | Apolipoprotein E                     | Pigment epithelium-derived factor            |



**Table S2:** 20 Most abundant proteins identified in human plasma and hard corona of SiO<sub>2</sub>NPs, SiO<sub>2</sub>NPs-ZW, and SiO<sub>2</sub>NPs-ZW-FO in descending order.

| PLASMA                                | SiO <sub>2</sub> NPs                  | SiO <sub>2</sub> NPs-ZW               | SiO <sub>2</sub> NPs-ZW-FO            |
|---------------------------------------|---------------------------------------|---------------------------------------|---------------------------------------|
| Albumin                               | Apolipoprotein A-I                    | Apolipoprotein B-100                  | Apolipoprotein B-100                  |
| Apolipoprotein A-I                    | Fibrinogen alpha chain                | Apolipoprotein A-I                    | Apolipoprotein A-I                    |
| Serotransferrin                       | Fibrinogen gamma chain                | Histidine-rich glycoprotein           | Fibrinogen alpha chain                |
| Alpha-1-antitrypsin                   | Fibrinogen beta chain                 | Fibrinogen alpha chain                | Fibrinogen gamma chain                |
| Immunoglobulin kappa                  | Apolipoprotein B-100                  | Complement C1q subcomponent subunit C | Fibrinogen beta chain                 |
| Fibrinogen alpha chain                | Albumin                               | Complement C1q subcomponent subunit B | Apolipoprotein E                      |
| Haptoglobin                           | Immunoglobulin heavy constant gamma 1 | Apolipoprotein E                      | Immunoglobulin heavy constant gamma 1 |
| Apolipoprotein B-100                  | Histidine-rich glycoprotein           | Trypsin                               | Histidine-rich glycoprotein           |
| Fibrinogen gamma chain                | Apolipoprotein E                      | Immunoglobulin heavy constant gamma 1 | Immunoglobulin kappa                  |
| Immunoglobulin lambda constant 3      | Apolipoprotein A-II                   | Immunoglobulin kappa                  | Trypsin                               |
| Immunoglobulin heavy constant alpha 1 | Immunoglobulin kappa                  | Fibrinogen gamma chain                | Albumin                               |
| Fibrinogen beta chain                 | Sialic acid-binding Ig-like lectin    | Complement C1q subcomponent subunit A | Complement C1q subcomponent subunit C |
| Immunoglobulin heavy constant gamma 1 | Serum amyloid A-4                     | Albumin                               | Immunoglobulin lambda constant 3      |
| Apolipoprotein A-IV                   | Trypsin                               | Fibrinogen beta chain                 | Complement C1q subcomponent subunit B |
| Vitamin D-binding protein             | Gelsolin                              | Immunoglobulin lambda constant 3      | Serum amyloid A-4                     |
| Transthyretin                         | Immunoglobulin lambda constant 3      | Plasma kallikrein                     | Complement C1q subcomponent subunit A |
| Alpha-1-antichymotrypsin              | Complement C1q subcomponent subunit C | Immunoglobulin heavy constant mu      | Complement C3                         |
| Trypsin                               | Complement C1q subcomponent subunit B | Complement C3                         | Apolipoprotein A-II                   |
| Alpha-2-macroglobulin                 | Complement C3                         | Kininogen-1                           | Sialic acid-binding Ig-like lectin    |
| Plasma protease C1 inhibitor          | Apolipoprotein A-IV                   | Immunoglobulin heavy constant gamma 3 | Immunoglobulin heavy constant mu      |

## 8. Hemolysis assay

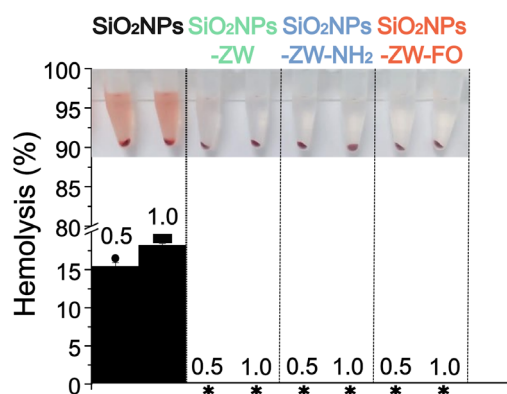

**Figure S7:** Hemolytic activity of SiO<sub>2</sub>NPs, SiO<sub>2</sub>NPs-ZW, SiO<sub>2</sub>NPs-ZW-NH<sub>2</sub>, and SiO<sub>2</sub>NPs-ZW-FO diluted in PBS 1×. The concentrations of NPs used were 0.5 and 1.0 mg·mL<sup>-1</sup>. Results are presented as mean ± standard deviation ( $n = 3$ ). The common symbols on the top of the bars indicate that there is no statistical difference between them. For samples marked with an asterisk, no significant hemolysis was observed.

## 9. Folate receptor expression

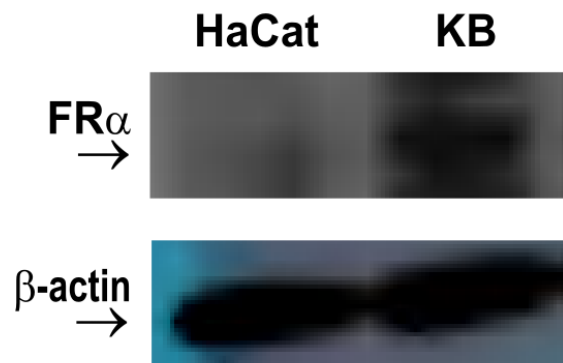

**Figure S8:** Western blot of HaCat and KB cell lysates (20  $\mu$ g of protein), showing identification of the folate receptor (37 kDa) by the anti-folate receptor alpha antibody. FR $\alpha$ : Folate alpha receptor. As expected, the band referring to FR $\alpha$  in the KB cell was more intense than the one in the HaCat cell, indicating a higher expression of the receptor.  $\beta$ -actin protein (42 kDa) was used as a loading control.

## 10. Nanoparticle internalization

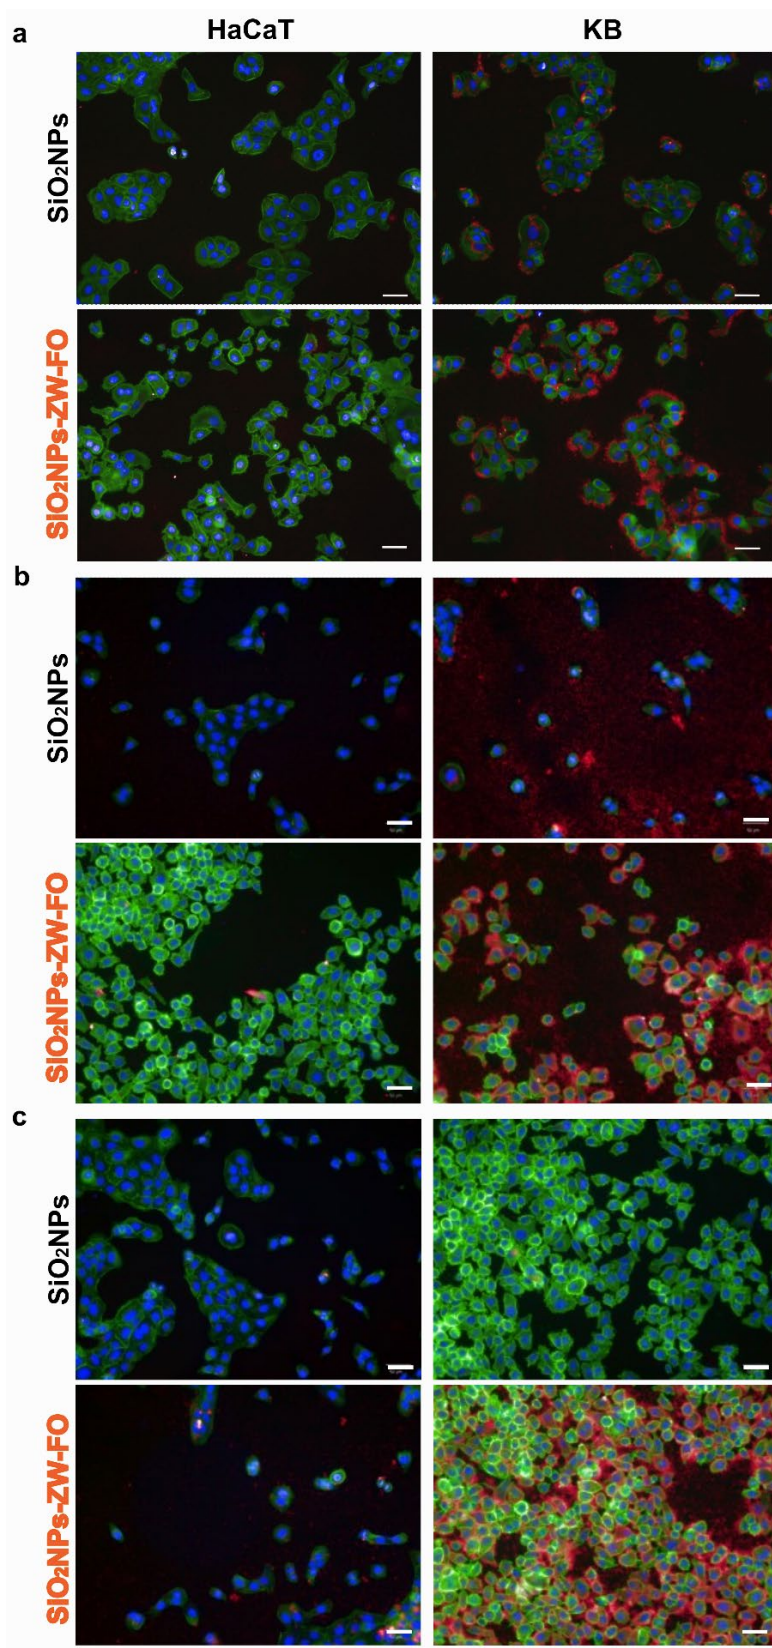

**Figure S9:** Cell targeting assay using non-functionalized SiO<sub>2</sub>NPs and SiO<sub>2</sub>NPs-ZW-FO, after a) 3 h, b) 6 h, and c) 12 h of incubation, obtained by an Operetta microscope. Cells were stained with DAPI (cell nuclei, blue) and phalloidin 488 (actin filaments, green), and SiO<sub>2</sub>NPs can be visualized in red. Scale bar: 50  $\mu$ m.

## 11. Nanoparticle internalization

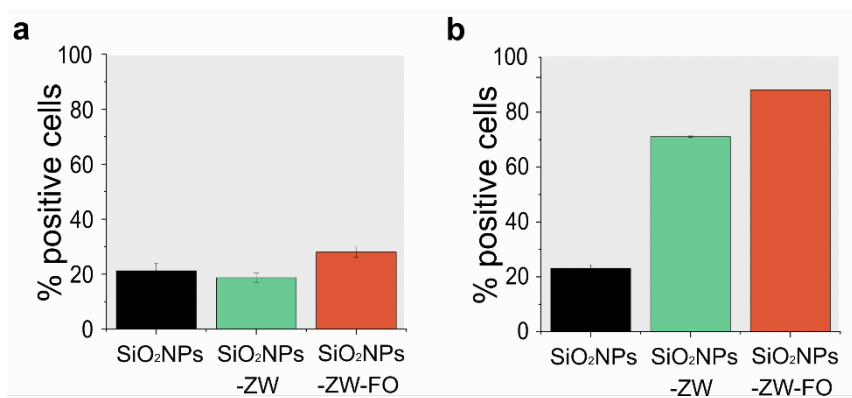

**Figure S10:** Percentage of positive cells for SiO<sub>2</sub>NPs, SiO<sub>2</sub>NPs-ZW, and SiO<sub>2</sub>NPs-ZW-FO, where a) HaCat and b) KB cells.
