# Supplementary material for: Dual-functionalized architecture enables stable and tumor cell-specific SiO2NPs in complex biological fluids
Source: Beilstein J Nanotechnol. 2024 Oct 7;15:1238–52. doi: 10.3762/bjnano.15.100 (PMC11472657; doi:10.3762/bjnano.15.100)
Supplement: File 2 — Mass spectrometry proteomic data (raw and processed data, DMEM). [file Beilstein_J_Nanotechnol-15-1238-s002.xlsx]

## Sheet: table1
Table1. Proteins identified in 12 samples - complete (LFQ intensity, intensity, msmscount)
LFQ intensity DMEM_1	LFQ intensity DMEM_2	LFQ intensity DMEM_3	LFQ intensity NUAD_1	LFQ intensity NUAD_2	LFQ intensity NUAD_3	LFQ intensity ZFD_1	LFQ intensity ZFD_2	LFQ intensity ZFD_3	LFQ intensity ZWD_1	LFQ intensity ZWD_2	LFQ intensity ZWD_3	Only identified by site	Reverse	Potential contaminant	Peptides	Razor + unique peptides	Unique peptides	Sequence coverage [%]	Unique + razor sequence coverage [%]	Unique sequence coverage [%]	Mol. weight [kDa]	Q-value	Score	Intensity	MS/MS count	Intensity DMEM_1	Intensity DMEM_2	Intensity DMEM_3	Intensity NUAD_1	Intensity NUAD_2	Intensity NUAD_3	Intensity ZFD_1	Intensity ZFD_2	Intensity ZFD_3	Intensity ZWD_1	Intensity ZWD_2	Intensity ZWD_3	MS/MS count DMEM_1	MS/MS count DMEM_2	MS/MS count DMEM_3	MS/MS count NUAD_1	MS/MS count NUAD_2	MS/MS count NUAD_3	MS/MS count ZFD_1	MS/MS count ZFD_2	MS/MS count ZFD_3	MS/MS count ZWD_1	MS/MS count ZWD_2	MS/MS count ZWD_3
#!{Type}E	E	E	E	E	E	E	E	E	E	E	E	C	C	C	N	N	N	N	N	N	N	N	N	N	N	N	N	N	N	N	N	N	N	N	N	N	N	N	N	N	N	N	N	N	N	N	N	N	N
0	0	915940	0	0	0	0	0	0	0	0	0				1	1	1	22.5	22.5	22.5	13.988	0	38.188	1053100	1	0	0	1053100	0	0	0	0	0	0	0	0	0	0	0	1	0	0	0	0	0	0	0	0	0
0	0	872450	0	0	0	0	0	0	0	0	0				11	1	0	29.2	2.9	0	46.236	0	7.736	1003100	1	0	0	1003100	0	0	0	0	0	0	0	0	0	0	0	1	0	0	0	0	0	0	0	0	0
2759100	8912100	2111300	322070	0	0	0	0	442770	0	0	0			+	9	3	3	22.9	10.9	10.9	46.397	0	72.443	14013000	5	5335600	2861700	5733300	30771	0	0	0	0	52120	0	0	0	1	2	2	0	0	0	0	0	0	0	0	0
7213300	17927000	31588000	2802100	0	2780700	2375700	0	2903200	8643000	0	0			+	3	1	1	4.8	2.4	2.4	46.941	0	44.206	72036000	3	16155000	12150000	33838000	3488600	0	1647700	1579600	0	2281700	895050	0	0	0	1	2	0	0	0	0	0	0	0	0	0
0	0	0	0	0	0	0	0	0	0	0	0				17	1	1	27.4	3.9	3.9	53.989	0	50.014	0	1	0	0	0	0	0	0	0	0	0	0	0	0	0	0	0	0	0	0	0	1	0	0	0	0
0	0	0	0	0	0	110220	0	0	0	0	0				2	2	2	1.9	1.9	1.9	79.812	0	10.927	1070600	1	0	0	0	0	955620	0	114940	0	0	0	0	0	0	1	0	0	0	0	0	0	0	0	0	0
0	0	0	0	12579000	0	2417200	1309000	0	0	0	0	+			1	1	1	2	2	2	51.847	1	-2	16140000	1	0	0	0	0	11078000	0	4059100	1003100	0	0	0	0	0	0	0	0	1	0	0	0	0	0	0	0
0	0	0	322630	236140	1334300	535300	30034000	0	248900	592150	915230				2	2	2	30.1	30.1	30.1	15.328	0	55.454	31726000	2	0	0	2073800	480910	224950	5803300	1226600	17528000	0	55622	1184100	3148700	0	0	1	0	0	0	0	1	0	0	0	0
0	0	0	0	0	0	0	0	0	514240000	0	0				1	1	1	5.8	5.8	5.8	38.133	0.0091743	6.3923	112480000	0	0	0	0	0	0	0	0	0	0	112480000	0	0	0	0	0	0	0	0	0	0	0	0	0	0
0	0	0	30635	73149	0	78275	113810	0	0	325460	77912				1	1	1	1.5	1.5	1.5	81.75	0	20.71	631930	1	0	0	0	15831	78810	0	95760	170600	0	0	187620	83313	0	0	0	0	0	0	0	0	0	0	1	0
0	0	0	0	0	0	0	0	0	0	0	11915	+			1	1	1	4.3	4.3	4.3	29.174	1	-2	10911	0	0	0	0	0	0	0	0	0	0	0	0	10911	0	0	0	0	0	0	0	0	0	0	0	0
2337300	2695800	3469800	0	0	0	0	0	0	0	0	0				3	1	1	6.5	2.2	2.2	46.963	0	6.7298	8187300	2	2337300	1860600	3989400	0	0	0	0	0	0	0	0	0	0	1	1	0	0	0	0	0	0	0	0	0
0	0	0	0	767140	1034100	0	456280	777060	0	292970	270740				2	2	2	16.5	16.5	16.5	56.854	0	11.631	3318200	3	0	0	0	0	378050	478040	0	465810	1198900	0	179780	617650	0	0	0	0	0	0	0	0	2	0	0	1
0	0	0	0	0	0	0	169950	0	0	0	0	+			1	1	1	2.6	2.6	2.6	43.387	1	-2	149350	0	0	0	0	0	0	0	0	149350	0	0	0	0	0	0	0	0	0	0	0	0	0	0	0	0
0	0	0	0	0	0	0	0	299090	0	0	0	+			1	1	1	3.3	3.3	3.3	27.793	1	-2	301710	1	0	0	0	0	0	0	0	0	301710	0	0	0	0	0	0	0	0	0	0	0	1	0	0	0
0	0	0	0	0	0	0	0	0	0	0	0			+	12	1	0	28.8	3.6	0	47.117	0.0093458	6.4353	0	1	0	0	0	0	0	0	0	0	0	0	0	0	0	0	0	1	0	0	0	0	0	0	0	0
128310000	212990000	196900000	1007600000	774300032	508580000	2079699968	923320000	1272800000	2701400064	852579968	1366599936			+	68	68	14	49.5	49.5	11.7	192.99	0	323.31	10029000000	335	53658000	87451000	70155000	914620000	671590000	441620000	2408500000	890240000	1291700000	437090000	1055300000	1707100000	3	2	5	24	41	20	50	25	45	40	36	44
4214100	5427100	3688700	2001600	3949300	1545500	3479100	0	3361600	3438500	6775500	11585000			+	3	3	3	38.9	38.9	38.9	11.756	0	64.376	42505000	6	6435500	6524000	9642500	2596500	3589900	958180	1216500	0	1371300	1158600	2931600	6080200	0	0	1	0	0	1	1	0	0	1	0	2
11675000	12708000	7788700	23834000	33109000	54594000	10563000	11395000	12945000	4646000	17366000	13912000			+	8	8	8	14.6	14.6	14.6	77.456	0	323.31	192850000	26	14012000	12884000	9244400	40182000	27570000	39660000	6717200	10989000	13795000	1969600	9778100	6047800	4	2	2	1	3	2	3	2	3	2	2	0
1413800	810200	913020	0	0	0	470150	0	726720	1541900	0	0			+	14	1	1	39.8	2.7	2.7	53.661	0	43.336	4377500	2	1585300	518160	972730	0	0	0	317030	0	589330	394930	0	0	0	1	1	0	0	0	0	0	0	0	0	0
13926000	4516700	14535000	71277000	37679000	105760000	53143000	28293000	33244000	101360000	37886000	28325000			+	17	17	17	47.2	47.2	47.2	55.207	0	197.91	468740000	47	12610000	7775700	17998000	64683000	53218000	95808000	63570000	40023000	51867000	8205600	39255000	13728000	2	1	4	6	5	6	5	3	3	1	5	6
877060	746780	415090	693930	1435000	2381700	1223900	910360	649760	332350	496110	1309800			+	3	3	3	5.8	5.8	5.8	67.703	0	75.519	10653000	12	1751600	1708100	1558000	1883900	597100	902400	677960	354620	346220	25901	261720	585440	1	1	0	2	2	1	1	0	0	1	1	2
0	1042900	0	2751100	0	0	477170	0	0	0	0	0			+	2	2	2	7.7	7.7	7.7	45.102	0	47.264	4628200	2	0	227680	0	3950900	0	0	449620	0	0	0	0	0	0	0	0	1	0	0	1	0	0	0	0	0
4475800	3311400	3735200	2228100	2251200	1850900	3228900	3317800	1517700	83020000	14784000	12707000			+	5	5	1	17.4	17.4	3.8	46.543	0	129.87	91258000	12	8778200	8230500	13427000	1358300	2913800	1233600	6616700	1762400	7150200	11071000	7383900	21332000	1	2	1	1	0	0	0	0	0	3	2	2
0	0	0	1033800	0	0	0	0	0	697420	0	0			+	4	4	3	10.6	10.6	8.8	59.299	0	62.069	1399300	3	0	83114	0	1163700	0	0	0	0	0	152550	0	0	0	0	0	3	0	0	0	0	0	0	0	0
4526400	975420	10129000	76203000	260810000	149300000	753409984	541470016	270289984	507660000	911969984	174930000			+	44	44	44	57.6	57.6	57.6	92.273	0	323.31	3186100000	163	4334100	2656200	6321000	143510000	220580000	97666000	948170000	503320000	348040000	80751000	577200000	253590000	0	0	1	9	15	7	31	24	16	8	33	19
610150	0	688680	1365900	0	0	0	0	0	0	1158900	0			+	2	2	2	10.1	10.1	10.1	22.336	0	38.965	4032800	3	1164000	0	297770	2215000	0	0	0	0	0	0	356070	0	1	0	0	1	0	0	0	0	0	0	1	0
0	0	0	3407800	1338600	1119600	1559200	693100	0	1557000	832210	1832400			+	2	2	2	4.8	4.8	4.8	65.19	0	25.881	10065000	4	0	0	0	3966200	1217300	298200	1752500	214470	0	660370	994910	960800	0	0	0	2	1	1	0	0	0	0	0	0
8019900	8624900	11430000	0	4171100	0	8934500	3697300	26315000	0	3275100	6428800			+	2	1	1	27.5	15	15	8.5787	0	38.178	78871000	3	851880	680020	1136000	0	8791800	0	10659000	4704100	37137000	0	3671400	11240000	0	0	1	0	0	0	1	0	1	0	0	0
45038	280790	114170	17646000	564940	24367	103840	1519900032	9011700	479730	71542000	4088000			+	30	30	4	58.8	58.8	13.6	53.5	0	323.31	1468500000	61	32271	865700	3177800	39888000	7861600	173450	2056400	1209000000	42882000	2026400	144520000	16037000	0	0	0	6	0	0	0	37	3	0	12	3
0	0	0	0	0	0	0	2194600	0	0	0	0			+	16	1	1	41.6	3	3	44.689	0.0093023	6.4336	1928500	1	0	0	0	0	0	0	0	1928500	0	0	0	0	0	0	0	0	0	0	0	1	0	0	0	0
0	0	0	0	0	0	0	265610000	782780	0	1565700	0			+	10	7	6	21	15.6	14.1	52.247	0	54.713	235400000	8	0	0	0	0	0	0	0	230790000	1207800	0	3405600	0	0	0	0	0	0	0	0	8	0	0	0	0
5545000	14932000	18144000	75526000	76789000	114390000	58997000	81568000	32716000	6838100	30175000	32831000			+	12	12	12	16.8	16.8	16.8	70.505	0	227.25	499290000	37	29729000	4650500	8721600	49537000	103720000	63712000	36810000	101750000	34823000	3952100	27238000	34644000	1	2	0	4	5	7	5	5	2	3	2	1
177250000	144850000	231140000	623960000	786120000	299369984	1979200000	1436600064	1176800000	2165799936	1840199936	1812199936			+	4	4	4	25.1	25.1	25.1	24.409	0	126.46	11555000000	62	172840000	144820000	299800000	782000000	751250000	418610000	1191600000	806600000	1987000000	86385000	2264700000	2649500000	1	2	2	6	4	2	11	3	7	4	8	12
3278400	3347900	2882300	5539900	2644100	5529600	1482700	5364400	2289500	4383800	3555300	0			+	6	6	6	23.3	23.3	23.3	39.234	0	135.15	32649000	15	2651200	4673600	2224100	13406000	980740	1657200	1646600	970070	1959000	1878800	601890	0	3	2	1	4	1	1	0	1	0	1	1	0
2262700	3768500	1765300	19025000	22327000	15477000	47910000	8360800	34894000	26973000	12402000	52526000			+	63	10	5	46.4	8.8	3	192.79	0	137.12	224080000	14	1930400	3719800	1627400	38916000	24778000	16956000	39163000	8690500	31425000	4445000	13318000	39112000	0	0	0	4	1	0	2	0	3	2	0	2
3324100	7477800	6478500	2763600	2231500	3274100	2961200	11649000	13115000	12520000	18698000	14205000			+	21	2	0	37.5	6.3	0	68.889	0	70.295	77276000	13	2277400	3281600	6059800	2075600	3000300	752990	3073300	10727000	11267000	4075400	16894000	13792000	0	2	2	0	1	1	0	1	1	1	1	3
20916000	40154000	17754000	7042800	12978000	10335000	16514000	31979000	49393000	27096000	93400000	65490000			+	16	3	3	29.6	6.1	6.1	68.709	0	108.18	345030000	22	27856000	16695000	27487000	9602400	1495600	5542300	12043000	30590000	61270000	5283500	68679000	78485000	1	1	0	0	1	0	1	3	2	1	7	5
482409984	288420000	216950000	2556000000	408390016	742289984	976630016	513980000	777059968	706280000	358620000	801489984			+	9	9	9	90.8	90.8	90.8	15.184	0	266.3	8273000000	186	612010000	228520000	232030000	2408800000	581300000	1229600000	1007800000	307790000	699770000	99372000	286050000	580030000	7	1	1	28	22	28	18	15	24	11	7	24
16698000	14860000	12872000	89374000	17954000	24752000	16275000	0	14038000	4480700	4637400	22738000			+	5	1	1	32.4	8.3	8.3	15.954	0	11.788	232640000	3	20839000	11555000	17561000	78573000	24696000	29793000	13956000	0	16168000	672410	2662700	16162000	0	0	0	1	0	0	1	0	0	0	0	1
20461000	34328000	2618400	603670	1090100	505900	2252900	144860000	6459900	3630100	1841300	7389700			+	13	10	6	30.5	25.6	16.3	51.621	0	197.35	192090000	18	15756000	23632000	829320	669600	1114800	358510	3237000	126610000	8111100	1257800	5600000	4910200	0	0	0	0	0	0	2	9	2	2	2	1
0	0	0	3221700	0	0	655600	0	662080	764760	0	0	+		+	1	1	1	5.7	5.7	5.7	15.057	1	-2	4911900	1	0	0	0	3165700	0	0	768610	0	758230	219370	0	0	0	0	0	1	0	0	0	0	0	0	0	0
15707000	12676000	26159000	33848000	48673000	62255000	27941000	67740000	22432000	12720000	20937000	22046000			+	7	7	7	11.9	11.9	11.9	67.011	0	90.48	344060000	11	9124000	6162600	18081000	47260000	79062000	86421000	16428000	26717000	18565000	623960	14475000	21136000	0	0	1	1	3	0	2	3	0	0	0	1
4878200	11506000	4758800	53222000	92390000	89333000	21399000	9317000	37697000	10927000	30594000	25471000			+	10	10	10	19.9	19.9	19.9	53.339	0	117.24	365930000	29	2044200	3994700	10716000	78261000	76122000	58223000	37136000	10652000	34712000	2857300	23559000	27649000	0	1	2	4	3	3	3	0	5	0	5	3
25546000	37441000	85400000	14605000	36907000	69988000	808390016	329440000	291080000	110860000	289120000	378590016			+	35	30	30	62.2	56	56	69.366	0	323.31	2279600000	112	12335000	15944000	26037000	13999000	420330000	19510000	671380000	442830000	267760000	29049000	122060000	238380000	3	0	4	3	5	4	16	18	22	2	12	23
28977000448	28906000384	24696999936	2061200000	1686700032	1807200000	2408300032	1994000000	6035700224	4728300032	3000399872	3182899968			+	59	59	54	79.9	79.9	73.6	69.293	0	323.31	99299000000	875	25094000000	24220000000	28682000000	1575500000	1442900000	1334100000	2649000000	1731500000	5636600000	628200000	3169700000	3135100000	134	132	144	48	51	52	44	44	78	36	56	56
0	0	0	6626700	0	5050700	12947000	5351800	12463000	19029000	16281000	20199000			+	3	3	3	15.7	15.7	15.7	24.241	0	78.129	75009000	7	0	0	0	7628300	0	2316600	16154000	3702200	10231000	5404500	11398000	18173000	0	0	0	1	1	0	0	1	0	0	1	3
354630	340630	261020	188400	0	427610	655630	472490	888990	425040	0	696960			+	3	3	3	2.2	2.2	2.2	138.44	0	17.597	2951200	2	52783	1369300	32876	16767	0	60936	188140	82334	110040	298210	0	739820	0	0	0	0	0	0	0	0	1	1	0	0
1073000	4011000	4484500	22060000	35710000	5110900	183540000	30535000	83493000	539129984	158480000	139290000			+	24	24	15	44.3	44.3	31.7	66.017	0	323.31	732270000	68	1084600	1048800	3484300	22939000	23599000	2995800	165980000	58122000	67328000	122160000	119960000	143570000	1	2	0	2	4	0	8	3	10	19	10	9
52452000	86812000	45542000	152280000	193030000	315990016	133590000	57932000	100290000	105840000	96795000	170940000			+	29	29	29	35.8	35.8	35.8	91.215	0	323.31	1376100000	99	29856000	29767000	47399000	235830000	331690000	187120000	96113000	20421000	89966000	17896000	108490000	181570000	4	4	3	14	15	6	10	3	12	10	9	9
0	0	0	0	0	0	0	3155600	562890	0	0	0			+	8	1	1	16.9	2.7	2.7	51.267	0	26.17	3340900	1	0	0	0	0	0	0	0	2773000	567820	0	0	0	0	0	0	0	0	0	0	1	0	0	0	0
1997400064	3192900096	4906800128	603059968	213830000	426260000	933379968	377129984	1018700032	1427699968	684140032	830120000			+	17	17	17	53.5	53.5	53.5	38.418	0	323.31	15691000000	445	2670300000	1686500000	4464300000	1042100000	339130000	674210000	1033600000	532870000	1507500000	136750000	877380000	726480000	47	54	54	44	26	33	31	21	36	25	35	39
3367000	20124000	11211000	19146000	47865000	15627000	254430000	89382000	94272000	40924000	118370000	105710000			+	19	17	16	32	29.7	28.2	59.51	0	314.26	739590000	36	284820	9184400	6517400	31152000	54554000	7785200	160590000	138270000	94264000	13061000	117320000	106610000	0	1	0	3	1	1	7	5	2	3	3	10
0	1033900	1033000	1109600	2622700	872910	3093800	57086000	14100000	5687000	16461000	5071500			+	11	6	2	16.3	10	3.6	62.378	0	71.359	87089000	8	0	7712.4	591730	116390	1298400	324710	6250000	53772000	8988600	3299100	8498000	3941500	0	0	0	1	1	0	0	3	1	1	1	0
362889984	159980000	624129984	2176499968	1132999936	773769984	1915100032	802489984	1193100032	3012900096	499120000	787350016			+	25	25	25	69.1	69.1	69.1	30.276	0	323.31	12074000000	317	218580000	242050000	419500000	2518000000	1542400000	1404400000	2079900000	840880000	1279200000	305740000	244740000	979200000	14	8	7	45	55	40	36	23	27	20	21	21
25596000	8964400	11516000	11272000	14712000	20515000	5400000	10386000	7080400	50719000	4841600	18590000			+	8	8	8	33.6	33.6	33.6	38.252	0	61.432	159360000	14	15588000	8687300	22471000	21486000	21289000	35699000	2181900	18640000	1643500	5307700	154930	6207400	1	1	1	0	1	0	1	0	4	4	0	1
0	5430100	7572200	32321000	3597800	15311000	3394200	839540	2111200	3104900	1541800	1124000			+	7	7	7	15.9	15.9	15.9	51.113	0	186.31	72290000	14	0	271840	607230	31848000	7491300	11135000	11696000	1094100	2848300	1208100	1712800	2376900	1	0	1	5	0	2	2	1	1	0	1	0
0	0	0	0	0	0	0	12431000	499400	0	330020	0			+	2	1	1	3	1.5	1.5	63.91	0.0047393	6.5349	11754000	1	0	0	0	0	0	0	0	10444000	965960	0	344010	0	0	0	0	0	0	0	0	1	0	0	0	0
74740000	69087000	37964000	13423000	16222000	10219000	17634000	12994000	10165000	4253800	10618000	15792000			+	11	11	11	34.1	34.1	34.1	54.71	0	181.12	268640000	18	50619000	37529000	65717000	14783000	9292600	12440000	10604000	22185000	16172000	1987900	18996000	8317100	5	3	5	2	0	0	1	0	1	0	1	0
4282800128	3419500032	3737600000	449020000	569200000	1570000000	367040000	282649984	1290700032	420440000	302790016	485120000			+	23	23	23	50.5	50.5	50.5	46.103	0	323.31	15815000000	476	3221800000	2029300000	4182400000	501590000	813580000	2204200000	565780000	273840000	1008700000	123620000	261460000	628750000	71	75	72	42	46	61	13	10	44	8	7	27
0	161540	0	9944900	38701000	8666200	50822000	66730000	42724000	313020000	84481000	88190000			+	19	19	18	44.6	44.6	43.5	62.129	0	323.31	293630000	69	0	12112	0	5888300	20590000	3418200	23434000	27078000	31348000	111790000	43515000	26556000	0	1	0	1	6	3	6	6	7	18	11	10
1184500	4265800	1202900	6962800	10471000	4035500	76104000	44490000	50624000	15469000	38531000	31256000			+	18	15	11	34.9	30.7	24	65.865	0	167.28	234640000	32	464110	3907200	458600	8995700	11239000	2345600	38884000	46317000	46108000	9360100	36524000	30038000	0	3	0	2	2	0	4	2	5	5	5	4
80915000	87284000	58818000	42983000	110600000	64042000	32312000	92977000	53592000	64743000	79677000	42544000			+	19	19	19	45.2	45.2	45.2	52.347	0	323.31	744710000	63	90284000	66232000	98476000	42977000	139100000	48800000	33085000	53502000	70072000	5051500	50097000	47033000	7	4	5	3	5	7	3	7	7	2	6	7
9760800	18887000	21923000	58681000	40845000	74171000	57200000	27037000	47615000	39211000	33424000	59018000			+	12	12	12	28.6	28.6	28.6	51.723	0	239.04	412330000	37	16475000	5818800	32023000	96437000	29214000	28031000	55559000	9286800	47176000	20211000	21940000	50156000	3	2	2	3	6	2	3	2	4	4	3	3
42873	25409	0	0	0	0	259430	0	59754	0	116830	330480			+	1	1	1	19.7	19.7	19.7	6.0282	0	9.7963	777310	2	47674	15012	0	0	0	0	216680	0	79130	0	176430	242390	0	0	0	0	0	0	1	0	0	0	0	1
0	0	0	513750	237130	132580	250560	775280000	12207000	139860	11041000	469630			+	28	13	8	53.6	29.2	19.3	55.802	0	209.34	706550000	17	0	0	0	7212900	962670	92470	1286100	632270000	30204000	165430	30898000	3454500	0	0	0	0	0	0	0	15	1	0	1	0
4870000	9306200	9464000	69588000	49951000	9508300	3117000	10520000	5681600	1106500	1513800	4754100			+	5	5	5	50	50	50	11.202	0	166.4	185760000	31	5884500	2965500	8486700	82682000	40510000	3209000	22277000	8368900	7803500	103490	1775300	1691400	2	2	4	6	4	1	3	5	1	0	2	1
1878100	1466500	1748300	35480000	40736000	30652000	91797000	144610000	23583000	44038000	180510000	76017000			+	8	8	8	31.3	31.3	31.3	35.979	0	286.04	588150000	31	6822600	2705200	3849700	35182000	44167000	41999000	87797000	113370000	38304000	7653800	144900000	61393000	0	0	0	5	2	3	3	3	2	4	5	4
501420	520730	396820	2769200	466160	2379600	0	0	0	0	0	502780			+	3	3	3	10.5	10.5	10.5	38.756	0	17.284	7101900	2	30616	734240	844020	3043200	26006	1979800	0	0	0	0	0	443990	0	0	0	1	0	1	0	0	0	0	0	0
1556600064	2891899904	1904099968	8625300	1301600	3492900	8161600	125040	146120000	142650000	2729300	8893400			+	41	41	38	67.9	67.9	64.4	75.829	0	323.31	6028000000	145	894690000	2169900000	2720300000	43439000	4559800	6281000	15741000	883980	142810000	10093000	5032400	14291000	42	32	36	4	3	2	3	0	14	3	3	3
23842000	29682000	30084000	107920000	22017000	100320000	54728000	10284000	31574000	46616000	9364000	31586000			+	17	17	17	22.2	22.2	22.2	99.55	0	224.33	447670000	37	17998000	17167000	25506000	92683000	16072000	124200000	61823000	10503000	43648000	6062800	5588700	26422000	4	3	5	5	3	3	4	1	3	2	1	3
13525000	32306000	28513000	75964000	29368000	16595000	20209000	19687000	21637000	30358000	10993000	11067000			+	12	12	12	16.9	16.9	16.9	101.24	0	195.58	280590000	19	19293000	14198000	16124000	42326000	15603000	56024000	63971000	13150000	25299000	4016600	8075700	2507400	0	1	0	5	4	2	3	0	0	0	2	2
5065200	8463000	15964000	51030000	11090000	28580000	0	1509600000	53420000	11706000	106510000	67360000			+	24	24	6	67.1	67.1	17.1	46.213	0	323.31	1641000000	45	748830	2415700	3978400	51160000	24070000	5972900	0	1334000000	46465000	5733300	119780000	46640000	0	1	0	2	0	0	0	34	2	0	4	2
0	0	0	0	0	0	0	8452600	0	0	0	0			+	27	2	1	45	4.6	1.8	54.971	0	39.877	7588600	1	0	0	0	0	0	0	0	7427800	0	0	160860	0	0	0	0	0	0	0	0	1	0	0	0	0
0	0	0	659020	0	0	628380	208420000	2207600	1848300	3385400	0			+	22	8	2	62.5	23.8	5.5	47.237	0	250.81	188330000	14	0	0	0	1462000	0	0	1231600	170220000	6612200	1107400	7696500	0	0	0	0	1	0	0	0	10	1	0	2	0
18913000	15689000	4745400	55841000	65021000	47596000	47432000	14072000	10447000	33945000	9496300	18522000			+	21	21	21	17.9	17.9	17.9	188.74	0	323.31	323130000	35	5615000	5271400	2807100	87217000	83145000	51327000	28752000	12754000	12765000	1843500	12857000	18778000	0	1	1	7	6	2	8	2	2	1	1	4
0	0	0	0	0	0	0	0	6292500	0	0	7397600			+	2	2	2	4	4	4	65.056	0	16.534	57164000	3	2079200	1683000	5798900	5201100	2828900	3382200	11008000	4313400	6122100	265480	7502400	6979300	0	1	0	0	0	0	1	0	0	0	0	1
7965500	9942200	7287700	15031000	24400000	18178000	21082000	25652000	9800500	10454000	60023000	58749000			+	3	3	3	19.2	19.2	19.2	24.536	0	125.67	237530000	13	8333400	5901500	10675000	18836000	20862000	13265000	20521000	26750000	9051900	2857700	50362000	50119000	2	0	1	1	1	1	1	2	2	2	0	0
0	0	3415800	2151200	0	0	1983100	0	1770600	2629700	1984800	2120000			+	3	3	3	4.9	4.9	4.9	68.886	0	20.789	14423000	8	0	0	3811300	2349700	0	0	2502300	0	1733300	558180	1584500	1884000	0	0	1	1	0	1	1	0	1	1	1	1
26012000	32415000	21546000	204740000	271510016	102890000	346289984	219500000	334529984	421369984	441460000	323140000			+	34	34	34	35.8	35.8	35.8	140.37	0	323.31	2234400000	120	10899000	21673000	25195000	251700000	187910000	80810000	334070000	179510000	343570000	112280000	365020000	321800000	1	0	0	10	12	3	16	16	16	11	16	19
3417400	1500100	1798900	29756000	57990000	15640000	20817000	71817000	27574000	4616500	70824000	38943000			+	16	16	16	8.3	8.3	8.3	248.98	0	165.4	317350000	31	6061700	1033400	3410100	27212000	85332000	26028000	19113000	50982000	16371000	677440	49614000	31511000	0	1	1	4	3	2	1	10	3	0	4	2
4710300	7608500	3908400	65208000	132900000	82252000	65917000	168950000	50120000	246990000	214300000	111700000			+	22	22	2	20.7	20.7	2.2	129.39	0	323.31	933230000	62	3320800	2617300	3550800	73539000	111280000	75994000	102300000	171610000	47633000	39952000	143150000	158300000	0	2	0	4	4	4	4	11	7	3	12	11
3387100	2493300	10428000	43587000	59873000	29343000	19192000	9685100	9480500	32304000	62468000	29444000			+	17	17	17	24.8	24.8	24.8	93.089	0	215.27	284120000	37	1920000	2385900	6135600	59044000	78595000	24772000	16582000	12408000	12756000	4083000	37518000	27917000	0	1	0	7	8	5	2	1	3	2	5	3
0	1690700	0	0	0	0	0	0	0	0	0	0			+	4	2	1	5.5	3.1	1.9	69.182	0	9.2278	1166900	1	0	1166900	0	0	0	0	0	0	0	0	0	0	0	1	0	0	0	0	0	0	0	0	0	0
7430200	0	1196100	20068000	0	6489000	6750000	0	5204300	2514000	0	1992000			+	5	5	5	15.6	15.6	15.6	38.348	0	50.844	51132000	11	7763000	0	943160	21314000	0	3744700	8592900	0	5035700	601850	0	3136400	0	0	0	5	1	2	1	0	2	0	0	0
0	2431800	0	4336500	7207000	10984000	5223300	0	4273000	0	8534700	0			+	3	3	3	8.7	8.7	8.7	48.821	0	17.689	38265000	2	0	539920	0	4011000	6779700	12703000	3763800	25456	2469100	0	7973000	0	0	0	0	2	0	0	0	0	0	0	0	0
384590	1106500	0	4209400	19379000	14984000	6769100	10121000	3371200	1680500	3244200	3673900			+	3	3	3	12	12	12	29.091	0	35.533	65118000	4	111920	258030	0	6089800	18423000	7756500	14591000	7780900	3500700	188620	2643800	3774300	0	0	0	0	2	1	0	1	0	0	0	0
14941000	12646000	29206000	81907000	95167000	154830000	277449984	201890000	254380000	718640000	280569984	204990000			+	8	8	8	49	49	49	22.144	0	287.93	1920500000	42	9606100	5423700	7686800	87958000	162700000	119970000	359800000	243820000	261670000	79372000	218390000	364130000	0	2	1	2	2	2	6	4	5	6	8	4
82240000	91304000	124980000	33712000	181380000	93511000	153740000	381300000	279420000	126290000	859769984	859000000			+	22	22	3	38.2	38.2	6.9	68.964	0	323.31	2837800000	104	82345000	136930000	199630000	47040000	239870000	103770000	94688000	386550000	364430000	34151000	837180000	311180000	2	5	7	3	8	5	7	16	13	7	22	9
0	0	0	0	0	0	0	0	671760	0	682960	1511900			+	4	4	4	6	6	6	86.858	0	42.307	2760200	3	0	0	0	0	0	0	0	137770	712020	0	604340	1306000	0	0	0	1	0	0	0	0	0	0	0	2
18181000	29333000	10730000	7792900	3092500	5864200	5104900	0	4133100	11960000	3029000	4728600			+	9	9	9	24.1	24.1	24.1	53.553	0	108.43	93370000	18	27677000	16674000	26187000	9427500	646950	4032900	2182400	0	4104900	1836100	98241	502640	3	3	2	1	0	1	3	0	3	2	0	0
0	0	484720	10479000	2705400	12958000	4686100	6590800	2127400	0	10812000	8379500			+	5	5	5	10.3	10.3	10.3	75.166	0	39.251	56810000	9	0	0	448750	14816000	12011000	11187000	6000200	6612400	2439500	178570	2105800	1010100	0	0	0	1	2	2	1	1	1	0	1	0
3534100	3870200	4407700	74049000	112770000	119990000	63401000	10732000	40055000	9120400	31398000	71039000			+	12	12	11	19.9	19.9	19.7	68.932	0	216.05	518380000	46	4387700	1546400	4458000	115920000	137860000	95397000	54781000	23734000	27473000	1459200	15977000	35390000	1	1	3	8	7	6	6	1	4	1	4	4
2102600	2573800	2638300	10977000	15105000	14455000	6268400	10336000	7286400	1868400	5997100	8660200			+	6	6	6	17.9	17.9	17.9	43.017	0	56.02	85019000	8	724380	190610	1446900	15176000	19271000	7698200	12538000	1952900	11663000	445310	1520200	12393000	0	0	0	1	2	0	1	0	1	1	1	1
88488000	51910000	80173000	480240000	354689984	344020000	260680000	171450000	199820000	333649984	352369984	263870000			+	28	28	28	34.1	34.1	34.1	85.411	0	323.31	2725000000	108	39427000	24046000	32470000	776850000	234530000	559090000	214380000	124150000	262380000	34208000	176000000	247430000	4	4	3	18	16	12	11	4	6	9	12	9
0	0	2101600	5113500	0	5021000	2355100	0	1915600	0	0	3284900			+	2	2	2	3.5	3.5	3.5	57.407	0	11.894	20062000	2	0	0	1608500	9322000	0	2996900	1832000	0	1172400	0	0	3129900	0	0	0	0	0	1	1	0	0	0	0	0
20611000	28940000	0	25352000	32764000	16186000	13900000	14101000	15095000	13047000	6606400	11018000			+	5	5	5	10	10	10	61.998	0	37.969	183290000	10	2062700	2806600	0	31435000	48218000	31513000	19887000	11481000	15645000	1221300	6586400	12436000	0	0	0	3	2	0	1	2	1	0	1	0
366630016	449900000	518460000	51002000	22884000	44734000	19781000	10519000	85332000	7292000	14441000	29187000			+	15	15	2	40.9	40.9	3.8	53.341	0	273.03	1512700000	44	397110000	356120000	521530000	44663000	7365500	32364000	31808000	4745500	73609000	2503600	4860500	36006000	7	9	12	3	1	1	1	0	6	3	1	0
14944000	24904000	33126000	354929984	777080000	503609984	911310016	1173200000	840590016	1744499968	2350500096	1720300032			+	31	31	2	43.7	43.7	2.3	85.686	0	323.31	9136900000	178	18045000	12456000	19318000	625750000	1442900000	848600000	852290000	1319800000	745850000	154650000	1313100000	1784100000	1	2	1	16	21	14	20	25	15	10	29	24
691489984	724259968	435529984	220400000	53828000	407460000	111050000	8756900	119640000	213750000	18432000	68909000			+	24	24	24	47.5	47.5	47.5	68.587	0	323.31	2833700000	82	645150000	517540000	557870000	403350000	64846000	335260000	81973000	4786700	134260000	9187100	8070500	71360000	18	16	14	11	2	3	7	0	5	4	1	1
27583000	14978000	98958000	0	0	0	0	0	2591300	0	0	0			+	7	7	7	34.7	34.7	34.7	23.182	0	53.961	148070000	12	24308000	20889000	102300000	0	0	0	0	0	568010	0	0	0	0	4	8	0	0	0	0	0	0	0	0	0
152920000	142310000	321369984	29738000	27536000	61868000	17240000	9048100	35919000	3245400	12029000	14131000			+	9	9	9	22.2	22.2	22.2	52.209	0	68.519	763700000	16	144000000	141470000	190620000	48965000	39522000	85944000	19023000	10528000	43157000	570560	11796000	28111000	3	5	2	1	1	1	1	0	0	1	0	1
96538000	78163000	106950000	189960000	245440000	327340000	100780000	43802000	96250000	91288000	73987000	100600000			+	26	26	26	36.1	36.1	36.1	101.51	0	323.31	1407500000	102	46132000	36464000	70090000	183670000	171130000	280360000	181950000	55271000	105040000	13398000	99120000	164850000	8	4	9	15	12	12	7	5	7	4	10	9
5745900	17130000	16070000	3039400	0	10957000	2445900	0	4911300	1729100	5473300	2328100			+	3	3	3	14.2	14.2	14.2	26.133	0	83.241	69233000	7	3728000	4038500	22704000	12295000	0	8252200	3746900	0	8212400	103050	2133500	4019900	1	2	1	1	0	0	0	0	1	0	0	1
7450400	5903400	9665800	24613000	43763000	5884000	12641000	31140000	15034000	27353000	25756000	13674000			+	8	8	8	21.1	21.1	21.1	54.099	0	149.05	204160000	42	3180800	2148900	6631800	37806000	70677000	12167000	10193000	18935000	8729600	3480700	22169000	8039800	1	2	2	5	11	5	2	5	3	0	4	2
750280000	776019968	655260032	246120000	26947000	405049984	41411000	11364000	63492000	12990000	6444500	3629600			+	11	11	11	42.9	42.9	42.9	42.663	0	239.49	2775700000	41	674800000	559240000	742230000	224460000	68810000	297500000	80887000	31046000	71390000	3098900	17544000	4734900	8	7	11	3	1	6	2	0	2	1	0	0
0	0	0	0	0	0	0	45275	0	0	0	0			+	24	1	1	41.2	3.7	3.7	54.195	0	7.0754	39786	1	0	0	0	0	0	0	0	39786	0	0	0	0	0	0	0	0	0	0	0	1	0	0	0	0
0	0	849810	0	0	0	0	0	0	0	0	0			+	2	2	2	8.5	8.5	8.5	43.315	0	21.478	977090	2	0	0	977090	0	0	0	0	0	0	0	0	0	0	0	2	0	0	0	0	0	0	0	0	0
0	0	0	0	0	0	0	0	0	2323800	989730	603430			+	2	2	2	3.4	3.4	3.4	282.39	0	11.514	2849300	3	0	0	0	0	0	0	0	0	0	171490	1689900	987900	0	0	0	0	0	0	0	0	0	1	1	1
0	0	0	0	37892	0	0	17638000	0	0	1233500	0			+	16	3	0	37.6	7.1	0	49.411	0	19.261	16286000	6	0	0	0	0	13407	0	0	11409000	0	0	4863500	0	0	0	0	0	0	0	0	3	1	0	2	0
15351000	23200000	16062000	116010000	196960000	35328000	43015000	157820000	45013000	209140000	263610000	76289000			+	18	18	18	58.4	58.4	58.4	46.228	0	323.31	1026000000	120	33678000	11623000	15170000	161520000	200990000	92043000	44083000	142860000	45612000	27290000	186060000	65018000	2	3	4	10	25	11	5	17	7	6	21	9
2203200	2590400	2592200	4786200	0	2965500	2163400	0	2324600	1630300	0	2064800			+	4	4	4	12.9	12.9	12.9	52.129	0	26.668	22412000	3	1371400	1308500	2182800	8667500	0	2164800	2773100	0	1540100	263760	0	2139700	0	0	0	1	0	1	0	0	0	0	0	1
0	0	0	13519	0	0	0	32327000	698120	0	1096600	53246			+	9	9	6	66.8	66.8	42.9	21.825	0	100.31	30103000	15	0	0	0	17411	0	0	0	28408000	812810	0	774570	90590	0	0	0	1	0	0	0	8	3	0	3	0
0	0	0	0	0	0	0	12983000	0	0	0	0			+	2	2	2	16.4	16.4	16.4	15.241	0	17.236	11409000	2	0	0	0	0	0	0	0	11409000	0	0	0	0	0	0	0	0	0	0	0	2	0	0	0	0
0	0	0	0	0	0	0	55465000	736320	0	0	0			+	6	3	3	32.4	16.2	16.2	22.406	0	26.207	49465000	4	0	0	0	0	0	0	0	48859000	605940	0	0	0	0	0	0	0	0	0	0	3	1	0	0	0
0	0	0	543020	0	0	0	82093000	995580	0	7569900	1588800			+	6	6	6	50	50	50	13.48	0	84.343	81406000	6	0	0	0	308930	0	0	0	77324000	95395	0	3341800	336230	0	0	0	0	0	0	0	4	0	0	2	0
4780100	5126600	4852300	29120000	66262000	19991000	17947000	19249000	15324000	80095000	43468000	33783000			+	14	14	14	48	48	48	45.296	0	285.64	243790000	43	423790	995510	4865800	27018000	43385000	8743900	18621000	17011000	24694000	23524000	33477000	41031000	1	0	0	4	8	1	5	3	5	2	7	7
0	0	0	0	0	199680	0	239570000	3245000	0	1646700	0			+	19	18	18	32.2	31	31	64.895	0	323.31	217880000	22	0	0	0	0	0	58169	0	209440000	4691000	0	3688500	0	0	0	0	0	0	0	0	19	2	0	1	0
293700000	272220000	199540000	329700000	237840000	375110016	120210000	20937000	82110000	62211000	26127000	65687000			+	22	22	22	26.5	26.5	26.5	106.19	0	323.31	1986700000	89	179390000	145720000	217600000	356110000	316100000	235840000	219020000	49372000	134810000	6311900	34987000	91453000	8	6	4	16	16	14	6	1	7	4	2	5
4925500	642530	2780100	12660000	0	5728900	1298700	0	1679300	2354000	0	2574400			+	5	5	5	17.5	17.5	17.5	46.017	0	44.98	34221000	12	5681300	515940	1723400	17421000	0	5883100	1049200	0	913320	226700	0	807370	2	2	1	4	0	0	2	0	1	0	0	0
120680000	82051000	115270000	16791000	26868000	56697000	14614000	16986000	85411000	4694700	7413200	17290000			+	11	11	1	29.2	29.2	2.9	46.236	0	251.26	536900000	20	171500000	85893000	143380000	8495600	10699000	18419000	7803600	8035800	66768000	416870	6909800	8574900	5	3	6	0	1	1	0	0	3	0	1	0
27906000	41340000	53899000	4119100	0	0	0	0	6591300	0	0	4084600			+	5	5	2	9.4	9.4	4.6	46.897	0	51.996	134340000	11	41054000	25124000	57966000	2138200	0	0	0	0	6244800	0	0	1812900	1	4	4	1	0	0	0	0	1	0	0	0
29743000	16990000	12835000	9301900	3889400	24040000	2217000	0	3120900	0	0	1094900			+	10	10	10	22.7	22.7	22.7	69.561	0	123.45	96732000	18	38160000	18097000	16123000	10561000	1802000	6584400	2458400	0	2530900	0	0	416450	9	2	4	1	0	2	0	0	0	0	0	0
0	0	0	0	0	0	0	60197	0	0	0	0	+		+	10	1	1	19.7	2.3	2.3	53.728	1	-2	52898	0	0	0	0	0	0	0	0	52898	0	0	0	0	0	0	0	0	0	0	0	0	0	0	0	0
0	0	0	0	0	0	0	0	0	0	0	0				1	1	1	2.6	2.6	2.6	56.775	0	8.1494	0	1	0	0	0	0	0	0	0	0	0	0	0	0	0	0	0	0	0	0	0	0	0	0	1	0
78085000	46499000	22695000	3166900	0	14807000	3631400	0	6580500	0	2917700	11230000				6	6	6	61.9	61.9	61.9	15.727	0	90.988	208590000	10	50060000	16942000	50069000	20615000	24771000	20310000	6041400	0	2716900	274860	6052500	10736000	4	3	1	1	0	1	0	0	0	0	0	0
0	0	0	0	0	0	1161700	0	306290	1154100	957420	898150				2	2	2	11.3	11.3	11.3	16.32	0	10.944	3355200	2	0	0	0	0	0	0	1305900	0	393590	270350	699790	685530	0	0	0	0	0	0	0	1	1	0	0	0
0	0	0	0	0	0	0	0	0	0	0	0				1	1	1	2.5	2.5	2.5	59.915	0	22.73	0	1	0	0	0	0	0	0	0	0	0	0	0	0	0	0	0	0	0	0	0	0	1	0	0	0
0	0	0	1086400	562230	0	0	0	0	0	0	0				2	2	2	6.1	6.1	6.1	52.045	0	18.382	1797400	2	0	0	0	1397100	400360	0	0	0	0	0	0	0	0	0	0	2	0	0	0	0	0	0	0	0
0	0	0	2488400	1461200	9413500	5145500	629260	2262800	1602400	0	3989000				2	2	2	6.7	6.7	6.7	54.51	0	16.894	25777000	4	0	0	0	9460500	423830	6189200	4303700	123240	2811600	176790	0	2288400	0	0	0	0	0	1	2	0	0	0	0	1
0	0	907650	2973300	0	1390500	0	0	0	0	0	0				2	2	2	4.4	4.4	4.4	51.297	0	17.858	5553900	4	0	0	902090	3697400	0	954410	0	0	0	0	0	0	0	0	0	2	0	1	0	0	1	0	0	0
0	0	0	0	0	0	0	0	0	566350	0	0	+			1	1	1	2.5	2.5	2.5	56.283	1	-2	123880	0	0	0	0	0	0	0	0	0	0	123880	0	0	0	0	0	0	0	0	0	0	0	0	0	0
35388000	35267000	24088000	169050000	7134200	29918000	56480000	7226900	31212000	116870000	5166500	27747000			+	23	23	23	70.2	70.2	70.2	51.424	0	323.31	466870000	79	25358000	36358000	49569000	163800000	9680900	37271000	52156000	3572200	36208000	22084000	1458900	29355000	2	2	6	18	1	9	11	3	8	6	1	12
0	0	0	0	0	0	901690	0	0	0	0	0				27	1	1	44.8	2.5	2.5	101.55	0	9.0456	940340	1	0	0	0	0	0	0	940340	0	0	0	0	0	0	0	0	0	0	0	1	0	0	0	0	0
6776800	1591700	0	3443400	2174100	0	3418400	2646000	2000600	11575000	2599400	10384000				3	3	3	31.1	31.1	31.1	16.265	0	29.549	44261000	4	18383000	699930	0	5342300	1859400	0	4877900	377540	1957100	411100	2772300	7580700	0	0	0	0	0	0	0	0	1	1	1	1
991489984	646720000	352780000	4260800000	722179968	1137600000	1768999936	266380000	834030016	2548300032	284409984	1139100032			+	14	14	10	90.3	90.3	66.2	15.859	0	323.31	14066000000	266	938840000	669110000	604650000	3992600000	907290000	2096100000	1707100000	299010000	892720000	116120000	186060000	1656200000	13	19	10	51	23	40	25	12	18	17	11	27
1130400	927230	0	4170100	3685000	5501300	4387300	0	0	862120	0	1721800				6	6	6	6.4	6.4	6.4	138.94	0	100.93	22072000	9	281800	276050	0	4244200	4903100	8205700	1973500	471830	1190000	41054	0	485130	0	1	1	1	0	2	1	2	1	0	0	0
0	0	0	2448400	9037500	2285700	2203000	1278100	941020	2840500	3070500	3898400				2	2	2	1.4	1.4	1.4	141.83	0	12.595	24456000	2	0	0	0	3338700	1152600	662850	6186700	1866800	1776500	713160	3134100	5624000	0	0	0	1	1	0	0	0	0	0	0	0
0	0	1368800	2177200	715070	1359100	1054000	680320	6832900	0	617690	643300				4	4	4	3.9	3.9	3.9	129.06	0	25.816	15858000	4	0	0	1771300	4899800	2212900	1206100	1867900	127790	2824800	0	98624	849030	0	0	0	0	0	0	1	0	2	0	1	0
0	530180	0	1062400	0	2026700	1101900	0	940260	0	0	1014600				1	1	1	3.3	3.3	3.3	33.886	0	7.1919	6054600	1	0	147590	0	966490	0	2481200	963320	0	778820	0	0	717120	0	0	0	0	0	0	0	0	1	0	0	0
0	0	0	1546300	0	798190	1693100	1823500	2227400	2122300	3051300	1920200				2	2	1	8.9	8.9	5	19.681	0	16.121	12535000	4	0	0	0	1826300	0	563720	1677100	1752200	2134100	527210	2384200	1670300	0	0	0	0	0	0	1	0	1	0	1	1
926610	507940	3255000	13414000	70934000	35630000	28451000	108670000	31363000	25291000	89650000	33515000				23	23	23	13.6	13.6	13.6	272.15	0	323.31	392530000	49	854640	804640	2617500	35427000	125710000	35914000	32710000	54592000	25107000	6497500	45822000	26473000	0	0	0	3	8	2	5	7	3	6	12	3
0	0	0	0	0	0	632910	1380700	0	562710	1287600	0				1	1	1	0.9	0.9	0.9	148.31	0	7.716	3051800	2	0	0	0	0	0	0	734240	1168400	0	129110	1020100	0	0	0	0	0	0	0	0	1	0	0	1	0
3261300	0	0	18605000	10790000	11503000	3808800	7160100	3832000	2843300	8007700	6490500				2	2	2	8.1	8.1	8.1	35.868	0	11.685	69533000	6	1046300	0	0	12614000	10712000	15739000	4563200	6603200	4809000	339140	6535200	6572300	0	0	0	1	1	0	0	2	0	1	1	0
0	4162700	2867800	17405000	20047000	46641000	17575000	13572000	19474000	24917000	10720000	16825000				9	9	9	20	20	20	50.243	0	82.717	181260000	18	0	2451300	2287600	36706000	26010000	31308000	16664000	13998000	16428000	355880	16760000	18287000	1	1	0	2	1	6	3	1	2	0	1	0
14998	0	0	26799	39116	129340	203290	0	70268	0	198760	239030				2	2	2	8.4	8.4	8.4	27.931	0	25.559	856280	5	13254	0	0	30821	43174	73361	151430	0	92160	0	116790	335290	0	0	0	0	0	1	1	0	0	0	1	2
6028700	3204600	8728300	46389000	44667000	46833000	162040000	90609000	151440000	86496000	70031000	83861000				11	11	11	44.2	44.2	44.2	34.015	0	143.98	713250000	39	3252400	3715500	6354900	52954000	73256000	40257000	84259000	78164000	113640000	11032000	97315000	149050000	0	0	0	2	2	2	5	7	6	1	6	8
148820	0	103870	0	0	0	181170	538520	0	0	0	0				2	2	2	0.9	0.9	0.9	242.48	0	12.237	979590	2	118350	0	283850	0	0	0	278610	298780	0	0	0	0	1	0	0	0	0	0	0	1	0	0	0	0
0	0	0	0	0	0	5307600	7247300	0	2027400	3787700	3751500				2	2	2	21.8	21.8	21.8	16.938	0	48.523	17582000	4	0	0	0	0	0	0	5212300	1972400	0	875170	3883100	5639100	0	0	0	0	0	0	0	0	0	2	1	1
0	0	559040	228370	1129400	1340600	809830	411870	0	0	312880	460230				2	2	2	4.6	4.6	4.6	41.06	0	12.324	5168400	5	0	0	1253900	140790	1786600	583070	561760	203310	0	0	134980	503960	0	0	0	1	2	1	0	0	0	0	0	1
5926000	14932000	16317000	3297000	4859500	0	4388900	0	5413200	0	4319600	4394800				2	2	2	11.5	11.5	11.5	21.068	0	18.616	60475000	2	17161000	12872000	18897000	2687300	1941300	0	1680300	0	2472500	0	1284000	1479500	0	0	1	1	0	0	0	0	0	0	0	0
0	0	0	1436400	0	0	2925600	0	1886700	3143300	1475300	0				1	1	1	16.7	16.7	16.7	10.692	0	93.541	8618600	3	0	0	0	1558300	0	0	3587200	0	1797000	662710	1013400	0	0	0	0	1	0	0	0	0	0	1	0	1
0	0	0	3385300	5426300	9672900	8063700	8573600	9870900	1756000	8587600	12872000				3	3	3	10	10	10	31.57	0	19.546	62266000	7	0	0	0	3719700	6439200	4690800	16074000	4212100	11432000	760790	9019800	5918000	0	0	0	1	1	0	1	1	2	1	0	0
0	0	0	808460	0	1303900	557880	0	0	0	0	591510				1	1	1	7.7	7.7	7.7	17.6	0	9.3026	3071300	2	0	0	0	882880	0	1004600	604390	0	0	0	0	579450	0	0	0	1	0	1	0	0	0	0	0	0
14018000	8983300	18050000	1268200	4938000	8942300	2518100	7635000	6529700	1121300	7219400	5148000				3	3	3	11.3	11.3	11.3	37.994	0	96.854	78264000	14	21016000	17582000	13432000	2307300	2705300	3920500	1540000	3532200	4705100	55429	4746300	2722000	2	1	0	1	2	0	1	1	3	1	2	0
0	0	0	0	41326	48920	95045	74853	75539	0	44140	90767				1	1	1	6.5	6.5	6.5	28.794	0	7.4198	441460	3	0	0	0	0	41197	39403	106010	64968	75491	0	30076	84316	0	0	0	0	1	1	0	0	0	0	0	1
0	0	0	0	0	0	0	0	209170	0	0	0				1	1	1	13.5	13.5	13.5	17.114	0	7.5869	211000	1	0	0	0	0	0	0	0	0	211000	0	0	0	0	0	0	0	0	0	0	0	1	0	0	0
275540	793070	661770	4305000	6440000	2446100	21600000	14097000	35619000	1050600	80447000	86924000				7	7	7	23	23	23	44.47	0	134.17	227480000	20	554780	606140	31628	7878800	9180900	4844800	24785000	11185000	42867000	4108800	70864000	50571000	0	0	0	0	1	0	3	1	4	2	5	4
273220	268000	451510	21030000	126100000	82274000	78420000	58865000	19277000	15127000	35126000	37293000			+	15	15	14	23.7	23.7	22.4	82.362	0	215.41	421520000	70	3979500	31524	6922400	60356000	71484000	76780000	66191000	49483000	18278000	7203300	33852000	26958000	1	1	0	10	13	5	8	6	8	3	7	8
0	0	0	0	0	0	0	0	0	0	0	341160				1	1	1	5.4	5.4	5.4	18.45	0.0091324	6.3415	1156900	0	0	7732.3	0	15743	33832	23878	331660	0	0	30129	401540	312430	0	0	0	0	0	0	0	0	0	0	0	0
0	0	0	0	0	0	0	2678300	0	0	0	0				1	1	1	9.1	9.1	9.1	14.678	0	9.231	2353600	2	0	0	0	0	0	0	0	2353600	0	0	0	0	0	0	0	0	0	0	0	2	0	0	0	0
0	0	0	77209	0	0	99472	93444	384730	0	0	84122				4	3	3	8.8	7.3	7.3	53.727	0	23.689	6818100	1	0	0	5692700	88857	0	42999	136650	101620	322440	346960	0	85823	0	0	0	0	0	0	0	0	1	0	0	0
0	0	0	0	0	0	3617800	3065300	2552700	980480	5725300	3991300				1	1	1	2.2	2.2	2.2	45.487	0	6.6495	17623000	3	0	0	0	0	0	0	3947100	2666700	2398400	215240	4727000	3668400	0	0	0	0	0	0	0	0	0	1	1	1
0	28877000	24847000	6595700	7337600	0	8651700	0	0	0	9146300	0				2	2	2	2.6	2.6	2.6	94.602	0	11.734	81919000	3	0	27888000	34398000	2372700	5252100	0	3782500	2639600	183780	0	3334700	2067700	0	0	0	0	1	0	0	1	0	0	0	1
0	0	0	677060	1350800	1461300	1452100	1551100	1214300	0	0	0				1	1	1	1.3	1.3	1.3	128.93	0.0092593	6.4315	7254100	1	0	0	0	390230	1194400	1282400	1663200	1598900	1125000	0	0	0	0	0	0	0	1	0	0	0	0	0	0	0
0	0	0	379950	542290	0	938640	865090	902630	0	850980	1247400				1	1	1	1.3	1.3	1.3	88.093	0.009434	6.4765	5431400	1	0	0	0	212900	378680	0	1203900	861690	1076900	0	780590	916850	0	0	0	0	0	0	0	0	0	0	0	1
0	0	0	1273900	0	0	1668700	0	0	849980	1504700	875190				3	3	3	7.3	7.3	7.3	74.407	0	25.633	5813000	5	0	0	0	1604000	0	0	2429400	138500	0	138770	1157300	345060	0	0	0	0	0	0	1	1	0	0	1	2
28301000	16606000	44677000	242440000	62243000	141000000	251740000	24709000	90218000	31415000	14104000	55840000				13	13	13	42.4	42.4	42.4	41.792	0	177.83	936480000	28	27979000	23133000	43387000	260960000	75932000	215400000	136550000	25015000	59028000	8432300	7900100	52762000	2	1	3	7	2	1	6	1	1	3	1	0
0	0	0	1426700	0	0	0	0	0	0	0	0				1	1	1	6.5	6.5	6.5	20.987	0	12.349	1605900	1	0	0	0	1605900	0	0	0	0	0	0	0	0	0	0	0	1	0	0	0	0	0	0	0	0
0	0	0	0	0	24264	0	105410	0	0	0	0				2	2	2	19.4	19.4	19.4	11.367	0	12.965	13616000	1	0	0	13504000	0	0	19267	0	92632	0	0	0	0	0	0	0	0	0	0	0	1	0	0	0	0
0	0	0	0	693130	0	0	0	1253200	0	0	0				2	2	2	12.2	12.2	12.2	17.869	0	13.309	1945300	4	0	0	0	0	681190	0	0	0	1264100	0	0	0	0	0	0	2	0	1	0	0	1	0	0	0
0	0	1102600	3121800	0	7168100	1131000	5947300	1349100	0	0	0				3	3	2	14.7	14.7	10.6	27.745	0	100.48	18532000	6	0	0	1357600	3639100	0	5852600	1271200	4882800	1271500	0	0	257240	0	0	0	1	0	1	1	1	1	0	0	1
81177000	87820000	92848000	54970000	99362000	61050000	6162700	40625000	14405000	0	42556000	24677000				5	5	5	13.4	13.4	13.4	50.14	0	31.109	606610000	8	57652000	46570000	86717000	238020000	84888000	25893000	8603000	18966000	6538700	0	20705000	12065000	0	0	0	1	0	0	2	1	1	0	2	1
0	0	0	0	0	41824	0	0	0	0	0	0	+			2	1	1	9.8	5.7	5.7	27.849	1	-2	33212	1	0	0	0	0	0	33212	0	0	0	0	0	0	0	0	0	0	0	1	0	0	0	0	0	0
762720	543070	0	577850	1048600	1309700	721220	0	307520	0	0	0				1	1	1	1.1	1.1	1.1	92.601	0	6.756	4873600	3	814000	400020	0	530170	1024700	1113600	660100	0	331070	0	0	0	1	1	0	0	0	0	0	0	1	0	0	0
0	0	0	0	0	0	0	0	0	0	0	150740				1	1	1	1.2	1.2	1.2	261.89	0	6.5696	138040	0	0	0	0	0	0	0	0	0	0	0	0	138040	0	0	0	0	0	0	0	0	0	0	0	0
0	0	0	6751100	1167400	0	0	0	0	0	0	0				1	1	1	3.1	3.1	3.1	49.924	0	7.9361	8746100	1	0	0	0	7598900	1147200	0	0	0	0	0	0	0	0	0	0	1	0	0	0	0	0	0	0	0
0	0	0	0	0	0	0	0	0	0	0	577680				1	1	1	16.3	16.3	16.3	10.281	0.0092166	6.4066	2283600	0	0	0	0	0	0	0	0	0	0	642520	1112000	529030	0	0	0	0	0	0	0	0	0	0	0	0
0	0	0	0	0	0	355370	366500	289710	0	433370	356580				2	2	2	0.9	0.9	0.9	312.25	0	12.628	1649500	2	0	0	0	0	0	0	350910	314490	225580	0	447180	311330	0	0	0	0	0	0	0	0	0	0	1	1
0	0	0	14764000	53363000	53194000	61763000	55097000	29423000	102910000	73752000	93608000				9	9	9	19.8	19.8	19.8	67.16	0	105.01	468440000	19	0	0	0	3380800	42125000	37069000	68198000	50322000	52533000	7203300	88681000	118930000	0	0	0	2	1	0	2	3	1	2	5	3
3041500	0	0	3417100	1744600	0	24922000	21731000	9242700	0	13484000	21435000				2	2	2	3.5	3.5	3.5	112.24	0	12.148	94535000	4	1940200	0	0	2550700	1714900	0	33425000	14379000	10303000	0	11625000	18599000	0	0	0	0	1	0	0	1	1	0	0	1
0	0	0	1047100	3333200	4242500	1264600	2702200	1903500	337950	2184200	3702900				2	2	2	12	12	12	27.89	0	84.735	18800000	10	0	0	0	1457200	3415600	3655700	1607400	1067300	2030100	76290	1878400	3611800	0	0	0	1	1	1	1	1	1	0	2	2
0	0	0	0	0	0	1033300	0	816640	0	0	2359600	+			1	1	1	3.7	3.7	3.7	30.314	1	-2	4062300	2	0	0	0	0	0	0	1077600	0	823790	0	0	2160900	0	0	0	0	0	0	1	0	1	0	0	0
0	0	0	158280	261500	489850	1199500	1078800	1235500	197740	1997800	5654900				3	3	3	13.1	13.1	13.1	24.967	0	33.079	11114000	13	0	0	0	103480	149280	230140	726590	550620	1584300	25123	2219700	5525200	0	0	0	1	2	1	2	1	1	0	1	4
0	0	0	224780	237350	662090	0	0	0	0	0	0				1	1	1	1.4	1.4	1.4	124.95	0	28.111	1008900	4	0	0	0	249360	222380	537120	0	0	0	0	0	0	0	0	0	2	1	1	0	0	0	0	0	0
0	0	0	483530	0	0	0	4696700	0	0	0	0				7	1	0	11.8	2	0	59.035	0	8.7252	4671500	1	0	0	0	544240	0	0	0	4127300	0	0	0	0	0	0	0	0	0	0	0	1	0	0	0	0
0	0	0	0	0	0	0	1080600	0	0	0	20177				1	1	1	1.4	1.4	1.4	86.527	0.0090909	6.2807	968030	1	0	0	0	0	0	0	0	949550	0	0	0	18478	0	0	0	0	0	0	0	1	0	0	0	0
0	0	0	1810800	1103200	1976100	0	0	0	0	0	0				1	1	1	2.3	2.3	2.3	76.608	0	8.581	4763700	1	0	0	0	1851800	947480	1964500	0	0	0	0	0	0	0	0	0	1	0	0	0	0	0	0	0	0
0	0	0	0	0	0	0	0	0	0	0	0	+			1	1	1	4.5	4.5	4.5	34.177	1	-2	0	1	0	0	0	0	0	0	0	0	0	0	0	0	0	0	0	0	0	0	0	1	0	0	0	0
0	0	0	0	0	0	2164500	0	1941300	13472000	2289300	3595100				3	3	3	4.8	4.8	4.8	79.972	0	55.337	18269000	4	0	0	0	1411100	1746200	0	3452800	0	1894200	2382300	2281800	5100100	0	0	0	0	0	0	0	0	1	1	0	2
0	0	97066	0	0	0	0	0	0	0	0	0				2	2	2	3.9	3.9	3.9	70.258	0	17.765	111600	2	0	0	111600	0	0	0	0	0	0	0	0	0	0	0	1	0	0	1	0	0	0	0	0	0
0	0	313320	551650	4102000	1302100	0	2860400	1357500	1042700	12396000	0				1	1	1	1.1	1.1	1.1	79.934	0	6.6081	20228000	2	0	0	258010	590060	2859000	1509600	0	5439300	2041400	297990	7232400	0	0	0	0	0	1	0	0	0	0	0	1	0
4096800	3232200	2259200	56870000	248980000	70353000	41204000	32573000	38419000	5718800	11895000	38921000	+			1	1	1	0.6	0.6	0.6	229.1	1	-2	529520000	3	2927000	1955000	1521800	109910000	145560000	102980000	66267000	41616000	24609000	998810	9974300	21204000	0	0	0	0	1	0	0	0	1	0	0	1
0	0	0	0	522440	0	388440	697020	917310	1088400	503480	591080				3	3	3	6.5	6.5	6.5	50.133	0	25.125	3381200	4	0	0	0	0	341360	0	413990	543300	1080200	329770	265380	407170	0	0	0	0	0	0	1	0	1	0	1	1
0	0	0	0	0	0	0	0	0	0	0	0				21	1	1	19.7	1.2	1.2	129.53	0	84.451	0	1	0	0	0	0	0	0	0	0	0	0	0	0	0	0	0	1	0	0	0	0	0	0	0	0
0	0	0	0	0	0	0	0	0	0	0	0	+			1	1	1	1.2	1.2	1.2	102.74	1	-2	0	4	0	0	0	0	0	0	0	0	0	0	0	0	0	0	4	0	0	0	0	0	0	0	0	0
0	0	0	0	0	0	0	0	0	0	0	0				2	2	1	2	2	2	72.082	0	9.3467	0	1	0	0	0	0	0	0	0	0	0	0	0	0	0	0	0	0	0	0	0	0	0	0	0	1
0	0	0	0	0	0	165260	0	0	0	0	0	+			1	1	1	0.9	0.9	0.9	123.86	1	-2	415280	0	0	0	0	0	242930	0	172350	0	0	0	0	0	0	0	0	0	0	0	0	0	0	0	0	0
0	0	0	221120	1021300	857440	594230	432570	494440	0	677630	902800				3	3	3	4	4	4	104.54	0	32.177	4619300	4	0	0	0	33257	478680	1719300	768950	181330	99659	0	130400	1207600	0	0	0	0	1	0	2	0	0	0	0	1
0	0	0	0	0	0	0	0	0	0	0	6641400	+			1	1	1	2	2	2	39.817	1	-2	47036000	0	347530	222540	2946100	523710	543990	1306600	15282000	6284700	8577800	789540	4129000	6082100	0	0	0	0	0	0	0	0	0	0	0	0
0	0	0	162560	0	0	351670	372270	292330	0	1357100	294290				3	3	3	4.9	4.9	4.9	67.974	0	16.11	2486100	2	0	0	0	26884	0	0	476840	540270	55153	0	1336200	50745	0	0	0	0	0	0	0	0	0	0	2	0
0	0	0	1321100	3990500	4712100	5539300	8335500	6834200	7150400	3903200	4110000				2	2	2	8.9	8.9	8.9	26.399	0	16.146	43741000	2	0	0	0	9957400	147350	3025300	8428000	6648600	4750100	105300	4779700	5899600	0	0	0	1	0	0	1	0	0	0	0	0
4473800	3196700	1275200	35825000	46944000	30663000	11893000	46457000	27709000	2451500	45888000	41374000				5	5	5	9.3	9.3	9.3	70.993	0	47.266	276620000	12	7261500	7371100	80559	50688000	66316000	38466000	9786800	22528000	17212000	348990	30285000	26277000	0	0	0	4	1	1	0	2	2	1	0	1
0	0	0	0	0	0	0	0	0	0	0	0				2	1	1	5	2.7	2.7	49.67	0	9.76	0	1	0	0	0	0	0	0	0	0	0	0	0	0	0	0	0	0	0	1	0	0	0	0	0	0
0	0	0	0	0	0	0	0	0	0	0	158000	+			1	1	1	2.2	2.2	2.2	55.704	1	-2	144690	0	0	0	0	0	0	0	0	0	0	0	0	144690	0	0	0	0	0	0	0	0	0	0	0	0
837970	0	0	0	1068300	2991600	1029500	1309800	0	0	1611300	0				3	3	3	16.4	16.4	16.4	40.463	0	22.19	7518600	5	329730	0	0	0	526640	2996900	519040	1462300	0	0	1684100	0	0	0	0	1	0	2	0	0	0	0	1	1
0	0	0	0	0	321010	484330	1117100	558180	0	556350	539340				1	1	1	3	3	3	44.859	0.0093897	6.4594	3280900	2	0	0	0	0	0	221450	539000	899700	645050	0	419490	556210	0	0	0	0	0	0	0	1	0	0	1	0
691720000	879089984	722960000	3935800064	3046400000	2733100032	986430016	459390016	911219968	1366800000	546790016	995609984			+	81	81	81	57.1	57.1	57.1	187.25	0	323.31	16206000000	373	395220000	251790000	458600000	3948600000	3953600000	3507400000	869700000	565050000	992690000	84381000	344440000	834540000	11	18	18	72	69	55	26	14	27	17	18	28
3064200	0	0	43906000	13517000	12754000	69669000	21512000	47505000	98464000	21904000	47262000				4	4	4	27.5	27.5	27.5	21.401	0	103.97	319040000	24	383750	0	0	54576000	7489000	15394000	107630000	18448000	49812000	16343000	18905000	30059000	1	0	0	2	3	0	2	4	3	2	3	4
0	0	0	1903400	1400800	7247600	0	0	926200	0	0	1114400				1	1	1	1.4	1.4	1.4	75.782	0	6.7126	11720000	1	0	0	0	3680800	1740700	4491000	0	0	781110	0	0	1026600	0	0	0	0	0	1	0	0	0	0	0	0
0	0	0	172950	213140	792480	284160	0	332970	107550	0	341490				1	1	1	5	5	5	29.677	0	7.4735	2082700	1	0	0	0	144560	191690	435300	361560	0	480190	10864	0	458530	0	0	0	0	0	1	0	0	0	0	0	0
0	0	0	0	0	0	0	0	0	0	0	206310				2	2	2	6.9	6.9	6.9	47.637	0	11.726	188930	2	0	0	0	0	0	0	0	0	0	0	0	188930	0	0	0	0	1	0	0	0	0	0	0	1
0	0	0	0	0	0	1284300	0	0	0	1640600	1425800				2	1	1	2.6	1.6	1.6	105.97	0	69.87	3994800	3	0	0	0	0	0	0	1339400	0	0	0	1349600	1305800	0	0	0	0	0	0	0	1	0	0	1	1
0	0	0	0	0	0	0	0	77879	0	0	0	+			1	1	1	3.1	3.1	3.1	37.186	1	-2	371510	0	18875	0	0	56113	60000	157960	0	0	78561	0	0	0	0	0	0	0	0	0	0	0	0	0	0	0
0	0	0	2482600	2088600	0	0	0	1885900	0	0	0	+			30	1	1	45.4	1.2	1.2	80.73	1	-2	6786100	1	0	0	0	3140800	2021000	0	0	0	1624300	0	0	0	0	0	0	0	1	0	0	0	0	0	0	0
0	0	0	3164800	4908000	10228000	3041100	0	1217200	0	7094900	2225300				3	3	3	9.1	9.1	9.1	51.272	0	58.887	27946000	7	0	0	0	3719100	4531500	12719000	1424800	0	283880	0	4422500	844820	0	0	0	1	1	3	1	0	0	0	1	0
0	0	0	0	0	0	0	0	0	0	1231000	0				1	1	1	1.6	1.6	1.6	82.905	0	9.3048	1012700	1	0	0	0	0	0	0	0	0	0	0	1012700	0	0	0	0	0	0	0	0	0	0	0	1	0
0	0	0	1029600	0	1303100	246190	0	0	0	0	0				2	1	1	9.8	5.7	5.7	27.764	0	56.614	2450400	2	0	0	0	1158900	0	1034700	256740	0	0	0	0	0	0	0	0	1	0	1	0	0	0	0	0	0
0	0	0	314820	58410	484080	306140	83173	172070	0	69294	294730				2	2	2	11.6	11.6	11.6	35.706	0	13.123	1661900	5	0	0	0	315190	51060	493900	283980	60462	172200	0	45053	240080	0	0	0	2	1	0	1	0	0	0	0	1
0	0	0	0	0	0	314380	0	453920	0	0	0	+			1	1	1	3.8	3.8	3.8	26.759	1	-2	785740	1	0	0	0	0	0	0	327850	0	457890	0	0	0	0	0	0	0	0	0	0	0	1	0	0	0
1248400	885320	1354000	0	895800	0	1489500	2873700	1326300	5268400	6046800	3622800				4	4	4	15.1	15.1	15.1	27.878	0	27.814	19553000	5	51454	17861	69591	1920000	1877500	0	2221900	2791900	2887600	1763100	1880200	4072400	0	0	0	0	0	0	1	0	1	0	2	1
0	0	0	0	0	0	0	0	0	0	0	269370				2	2	2	4.1	4.1	4.1	35.686	0	10.757	1051800	1	0	0	0	283680	107450	108410	138380	0	0	0	167200	246680	0	0	0	0	0	0	0	0	0	0	1	0
0	0	0	111130	68687	349200	200610	205910	113600	0	70049	211940				1	1	1	7	7	7	22.426	0	11.87	1226300	7	0	0	0	125080	67504	277290	209210	180940	114590	0	57627	194090	0	0	0	1	1	0	1	1	1	0	1	1
0	0	0	77049	133570	200640	190010	325600	175880	0	0	0				2	2	2	5.3	5.3	5.3	62.481	0	11.519	1020700	2	0	0	0	32365	84930	118620	182380	451230	151150	0	0	0	0	0	0	0	0	1	1	0	0	0	0	0
0	0	0	0	0	0	0	0	0	0	0	0	+			1	1	1	1.6	1.6	1.6	78.134	1	-2	0	1	0	0	0	0	0	0	0	0	0	0	0	0	0	0	0	0	0	0	0	0	0	0	1	0
0	0	0	8662700	28910000	5544800	52955000	26763000	0	0	0	13573000				1	1	1	2.5	2.5	2.5	40.786	0	6.8897	136820000	4	0	0	0	7245000	22351000	2819500	75030000	18501000	0	0	1090100	9778200	0	0	0	0	1	0	0	1	0	0	1	1
450070	0	0	1932200	0	3322500	1878000	0	1684600	620970	0	4826600				1	1	1	4.8	4.8	4.8	26.689	0	28.876	13420000	1	113240	0	0	2349200	0	4900400	2056100	0	1600300	47150	0	2353500	0	0	0	0	0	0	0	0	0	0	0	1
2907900	3026200	0	6131300	3673400	4597200	2816500	5800000	3092000	953520	0	2552700				3	3	3	9.3	9.3	9.3	36.723	0	31.717	32184000	4	2485200	1954900	0	6696900	2920200	9089700	1427100	5099500	1663600	34307	0	812780	0	0	0	2	2	0	0	0	0	0	0	0
0	0	0	2366200	2404600	0	2306000	2073900	1979000	2077200	3443800	2156400				2	2	2	8.6	8.6	8.6	25.802	0	14.081	17065000	3	0	0	0	3323300	1729200	0	2139000	1881900	2342000	309010	2719100	2621500	0	0	0	0	0	0	1	1	0	0	1	0
0	0	0	0	966000	1550300	1078800	798020	0	401250	523820	1229800				1	1	1	8.4	8.4	8.4	18.518	0	8.0593	5749600	1	0	0	0	0	929960	1935300	1230700	567480	0	35712	228900	821620	0	0	0	0	0	0	0	0	0	0	0	1
0	504170	804950	3586200	11909000	8426900	35283000	40398000	19234000	905200	10874000	6107400				8	8	8	17.2	17.2	17.2	62.44	0	186.86	127980000	19	0	191080	526930	5451100	18243000	24656000	26176000	29310000	14089000	300500	6748000	2292300	0	0	0	1	1	2	4	4	2	0	4	1
0	0	0	56867	0	120180	66991	0	82250	0	0	86641				2	2	2	4.3	4.3	4.3	47.231	0	11.737	381400	2	0	0	0	39724	0	125160	67021	0	74475	0	0	75024	0	0	0	0	0	0	1	1	0	0	0	0
378930	601560	0	6403200	5718900	2561900	863380	643910	799350	0	633450	1057200	+			1	1	1	4.6	4.6	4.6	29.209	1	-2	18467000	2	324320	447740	0	4725200	3684800	4527300	1163200	631320	1002400	0	576680	1384200	0	0	0	1	1	0	0	0	0	0	0	0
148960	152540	166650	777920	725290	2409800	2487500	0	753520	0	441610	0				2	2	2	4.2	4.2	4.2	69.871	0	41.496	7699600	5	19762	14079	26391	2541600	2288500	2319000	247970	0	173110	0	69240	0	0	0	0	2	0	2	1	0	0	0	0	0
0	0	0	0	0	0	0	0	0	0	0	0	+			1	1	1	1.4	1.4	1.4	81.306	1	-2	0	1	0	0	0	0	0	0	0	0	0	0	0	0	0	0	0	0	0	0	0	0	0	1	0	0
0	625680	0	503090	0	912310	0	0	0	0	0	704370				1	1	1	1.4	1.4	1.4	87.466	0	6.7162	2377700	1	0	349770	0	584140	0	855570	0	0	0	0	0	588170	0	0	0	1	0	0	0	0	0	0	0	0
0	0	1763400	3098100	0	0	0	0	0	0	0	1330900				1	1	1	1.5	1.5	1.5	84.73	0	15.062	6769900	1	0	0	2413500	3261200	0	0	0	0	0	0	0	1095100	0	0	0	1	0	0	0	0	0	0	0	0
1378200064	1208499968	1456700032	471960000	310969984	443300000	207310000	274169984	307040000	455289984	373609984	214350000			+	58	58	58	53.8	53.8	53.8	167.57	0	323.31	6588300000	205	1423500000	1171400000	1438000000	522550000	469400000	515230000	119390000	266100000	256500000	28634000	222790000	154790000	26	24	36	20	15	7	12	12	17	7	16	13
0	0	12246	0	11816	0	23880	3032000	59199	0	47751	35607				3	3	3	5.2	5.2	5.2	81.82	0	38.429	2847800	4	0	0	20460	0	9365.1	0	28550	2569900	79658	0	94284	45648	0	0	0	0	0	0	0	3	1	0	0	0
0	0	1170500	4118200	1951200	2763400	5827000	5192200	3393600	21999000	18984000	30075000				5	5	5	35.3	35.3	35.3	21.063	0	220.45	67750000	9	0	0	328780	4310500	604790	823640	7804800	1281200	5488000	6401100	13018000	27689000	0	0	0	0	0	0	2	0	0	0	3	4
0	0	0	960410	0	395030	0	0	0	0	0	0				1	1	1	4.3	4.3	4.3	39.666	0	7.6846	1394700	1	0	0	0	1081000	0	313680	0	0	0	0	0	0	0	0	0	1	0	0	0	0	0	0	0	0
5287600	19946000	3686400	1681800	0	0	0	0	1675400	0	1389400	0	+	+		1	1	1	0	0	0	128.27	1	-2	49155000	4	6305000	26703000	8221300	3671700	0	0	0	0	3278200	0	975850	0	0	1	1	1	0	0	0	0	1	0	0	0
0	0	0	112150	0	0	0	0	0	0	0	0	+	+		1	1	1	0	0	0	129.7	1	-2	126230	1	0	0	0	126230	0	0	0	0	0	0	0	0	0	0	0	1	0	0	0	0	0	0	0	0
1400700	1788700	2304400	0	0	2894200	0	0	2031700	0	0	0	+	+		1	1	1	0	0	0	51.219	1	-2	9459500	1	928620	1045200	2366600	0	0	3148200	0	0	1970900	0	0	0	0	0	1	0	0	0	0	0	0	0	0	0
0	0	0	0	0	0	0	0	0	0	0	2678500		+		1	1	1	0	0	0	32.435	0.0094787	6.5302	10388000	0	0	0	0	0	0	0	2630700	0	0	4311500	992580	2452900	0	0	0	0	0	0	0	0	0	0	0	0
0	0	0	2000000	0	0	5016500	0	0	0	5636100	3324600		+		1	1	1	0	0	0	64.922	0.0047619	6.5664	19124000	1	0	0	0	1274600	0	0	7429400	0	0	0	7554900	2865500	0	0	0	0	0	0	0	0	0	0	1	0
[truncated: 4 more columns]

## Sheet: table2
Table 2. Proteins identified after excluding reverse sequencies and "only identified by site" entries
LFQ intensity DMEM_1	LFQ intensity DMEM_2	LFQ intensity DMEM_3	LFQ intensity NUAD_1	LFQ intensity NUAD_2	LFQ intensity NUAD_3	LFQ intensity ZFD_1	LFQ intensity ZFD_2	LFQ intensity ZFD_3	LFQ intensity ZWD_1	LFQ intensity ZWD_2	LFQ intensity ZWD_3	Only identified by site	Reverse	Potential contaminant	Peptides	Razor + unique peptides	Unique peptides	Sequence coverage [%]	Unique + razor sequence coverage [%]	Unique sequence coverage [%]	Mol. weight [kDa]	Q-value	Score	Intensity	MS/MS count	Intensity DMEM_1	Intensity DMEM_2	Intensity DMEM_3	Intensity NUAD_1	Intensity NUAD_2	Intensity NUAD_3	Intensity ZFD_1	Intensity ZFD_2	Intensity ZFD_3	Intensity ZWD_1	Intensity ZWD_2	Intensity ZWD_3	MS/MS count DMEM_1	MS/MS count DMEM_2	MS/MS count DMEM_3	MS/MS count NUAD_1	MS/MS count NUAD_2	MS/MS count NUAD_3	MS/MS count ZFD_1	MS/MS count ZFD_2	MS/MS count ZFD_3	MS/MS count ZWD_1	MS/MS count ZWD_2	MS/MS count ZWD_3
#!{Type}E	E	E	E	E	E	E	E	E	E	E	E	C	C	C	N	N	N	N	N	N	N	N	N	N	N	N	N	N	N	N	N	N	N	N	N	N	N	N	N	N	N	N	N	N	N	N	N	N	N
0	0	915940	0	0	0	0	0	0	0	0	0				1	1	1	22.5	22.5	22.5	13.988	0	38.188	1053100	1	0	0	1053100	0	0	0	0	0	0	0	0	0	0	0	1	0	0	0	0	0	0	0	0	0
0	0	872450	0	0	0	0	0	0	0	0	0				11	1	0	29.2	2.9	0	46.236	0	7.736	1003100	1	0	0	1003100	0	0	0	0	0	0	0	0	0	0	0	1	0	0	0	0	0	0	0	0	0
2759100	8912100	2111300	322070	0	0	0	0	442770	0	0	0			+	9	3	3	22.9	10.9	10.9	46.397	0	72.443	14013000	5	5335600	2861700	5733300	30771	0	0	0	0	52120	0	0	0	1	2	2	0	0	0	0	0	0	0	0	0
7213300	17927000	31588000	2802100	0	2780700	2375700	0	2903200	8643000	0	0			+	3	1	1	4.8	2.4	2.4	46.941	0	44.206	72036000	3	16155000	12150000	33838000	3488600	0	1647700	1579600	0	2281700	895050	0	0	0	1	2	0	0	0	0	0	0	0	0	0
0	0	0	0	0	0	0	0	0	0	0	0				17	1	1	27.4	3.9	3.9	53.989	0	50.014	0	1	0	0	0	0	0	0	0	0	0	0	0	0	0	0	0	0	0	0	0	1	0	0	0	0
0	0	0	0	0	0	110220	0	0	0	0	0				2	2	2	1.9	1.9	1.9	79.812	0	10.927	1070600	1	0	0	0	0	955620	0	114940	0	0	0	0	0	0	1	0	0	0	0	0	0	0	0	0	0
0	0	0	322630	236140	1334300	535300	30034000	0	248900	592150	915230				2	2	2	30.1	30.1	30.1	15.328	0	55.454	31726000	2	0	0	2073800	480910	224950	5803300	1226600	17528000	0	55622	1184100	3148700	0	0	1	0	0	0	0	1	0	0	0	0
0	0	0	0	0	0	0	0	0	514240000	0	0				1	1	1	5.8	5.8	5.8	38.133	0.0091743	6.3923	112480000	0	0	0	0	0	0	0	0	0	0	112480000	0	0	0	0	0	0	0	0	0	0	0	0	0	0
0	0	0	30635	73149	0	78275	113810	0	0	325460	77912				1	1	1	1.5	1.5	1.5	81.75	0	20.71	631930	1	0	0	0	15831	78810	0	95760	170600	0	0	187620	83313	0	0	0	0	0	0	0	0	0	0	1	0
2337300	2695800	3469800	0	0	0	0	0	0	0	0	0				3	1	1	6.5	2.2	2.2	46.963	0	6.7298	8187300	2	2337300	1860600	3989400	0	0	0	0	0	0	0	0	0	0	1	1	0	0	0	0	0	0	0	0	0
0	0	0	0	767140	1034100	0	456280	777060	0	292970	270740				2	2	2	16.5	16.5	16.5	56.854	0	11.631	3318200	3	0	0	0	0	378050	478040	0	465810	1198900	0	179780	617650	0	0	0	0	0	0	0	0	2	0	0	1
0	0	0	0	0	0	0	0	0	0	0	0			+	12	1	0	28.8	3.6	0	47.117	0.0093458	6.4353	0	1	0	0	0	0	0	0	0	0	0	0	0	0	0	0	0	1	0	0	0	0	0	0	0	0
128310000	212990000	196900000	1007600000	774300032	508580000	2079699968	923320000	1272800000	2701400064	852579968	1366599936			+	68	68	14	49.5	49.5	11.7	192.99	0	323.31	10029000000	335	53658000	87451000	70155000	914620000	671590000	441620000	2408500000	890240000	1291700000	437090000	1055300000	1707100000	3	2	5	24	41	20	50	25	45	40	36	44
4214100	5427100	3688700	2001600	3949300	1545500	3479100	0	3361600	3438500	6775500	11585000			+	3	3	3	38.9	38.9	38.9	11.756	0	64.376	42505000	6	6435500	6524000	9642500	2596500	3589900	958180	1216500	0	1371300	1158600	2931600	6080200	0	0	1	0	0	1	1	0	0	1	0	2
11675000	12708000	7788700	23834000	33109000	54594000	10563000	11395000	12945000	4646000	17366000	13912000			+	8	8	8	14.6	14.6	14.6	77.456	0	323.31	192850000	26	14012000	12884000	9244400	40182000	27570000	39660000	6717200	10989000	13795000	1969600	9778100	6047800	4	2	2	1	3	2	3	2	3	2	2	0
1413800	810200	913020	0	0	0	470150	0	726720	1541900	0	0			+	14	1	1	39.8	2.7	2.7	53.661	0	43.336	4377500	2	1585300	518160	972730	0	0	0	317030	0	589330	394930	0	0	0	1	1	0	0	0	0	0	0	0	0	0
13926000	4516700	14535000	71277000	37679000	105760000	53143000	28293000	33244000	101360000	37886000	28325000			+	17	17	17	47.2	47.2	47.2	55.207	0	197.91	468740000	47	12610000	7775700	17998000	64683000	53218000	95808000	63570000	40023000	51867000	8205600	39255000	13728000	2	1	4	6	5	6	5	3	3	1	5	6
877060	746780	415090	693930	1435000	2381700	1223900	910360	649760	332350	496110	1309800			+	3	3	3	5.8	5.8	5.8	67.703	0	75.519	10653000	12	1751600	1708100	1558000	1883900	597100	902400	677960	354620	346220	25901	261720	585440	1	1	0	2	2	1	1	0	0	1	1	2
0	1042900	0	2751100	0	0	477170	0	0	0	0	0			+	2	2	2	7.7	7.7	7.7	45.102	0	47.264	4628200	2	0	227680	0	3950900	0	0	449620	0	0	0	0	0	0	0	0	1	0	0	1	0	0	0	0	0
4475800	3311400	3735200	2228100	2251200	1850900	3228900	3317800	1517700	83020000	14784000	12707000			+	5	5	1	17.4	17.4	3.8	46.543	0	129.87	91258000	12	8778200	8230500	13427000	1358300	2913800	1233600	6616700	1762400	7150200	11071000	7383900	21332000	1	2	1	1	0	0	0	0	0	3	2	2
0	0	0	1033800	0	0	0	0	0	697420	0	0			+	4	4	3	10.6	10.6	8.8	59.299	0	62.069	1399300	3	0	83114	0	1163700	0	0	0	0	0	152550	0	0	0	0	0	3	0	0	0	0	0	0	0	0
4526400	975420	10129000	76203000	260810000	149300000	753409984	541470016	270289984	507660000	911969984	174930000			+	44	44	44	57.6	57.6	57.6	92.273	0	323.31	3186100000	163	4334100	2656200	6321000	143510000	220580000	97666000	948170000	503320000	348040000	80751000	577200000	253590000	0	0	1	9	15	7	31	24	16	8	33	19
610150	0	688680	1365900	0	0	0	0	0	0	1158900	0			+	2	2	2	10.1	10.1	10.1	22.336	0	38.965	4032800	3	1164000	0	297770	2215000	0	0	0	0	0	0	356070	0	1	0	0	1	0	0	0	0	0	0	1	0
0	0	0	3407800	1338600	1119600	1559200	693100	0	1557000	832210	1832400			+	2	2	2	4.8	4.8	4.8	65.19	0	25.881	10065000	4	0	0	0	3966200	1217300	298200	1752500	214470	0	660370	994910	960800	0	0	0	2	1	1	0	0	0	0	0	0
8019900	8624900	11430000	0	4171100	0	8934500	3697300	26315000	0	3275100	6428800			+	2	1	1	27.5	15	15	8.5787	0	38.178	78871000	3	851880	680020	1136000	0	8791800	0	10659000	4704100	37137000	0	3671400	11240000	0	0	1	0	0	0	1	0	1	0	0	0
45038	280790	114170	17646000	564940	24367	103840	1519900032	9011700	479730	71542000	4088000			+	30	30	4	58.8	58.8	13.6	53.5	0	323.31	1468500000	61	32271	865700	3177800	39888000	7861600	173450	2056400	1209000000	42882000	2026400	144520000	16037000	0	0	0	6	0	0	0	37	3	0	12	3
0	0	0	0	0	0	0	2194600	0	0	0	0			+	16	1	1	41.6	3	3	44.689	0.0093023	6.4336	1928500	1	0	0	0	0	0	0	0	1928500	0	0	0	0	0	0	0	0	0	0	0	1	0	0	0	0
0	0	0	0	0	0	0	265610000	782780	0	1565700	0			+	10	7	6	21	15.6	14.1	52.247	0	54.713	235400000	8	0	0	0	0	0	0	0	230790000	1207800	0	3405600	0	0	0	0	0	0	0	0	8	0	0	0	0
5545000	14932000	18144000	75526000	76789000	114390000	58997000	81568000	32716000	6838100	30175000	32831000			+	12	12	12	16.8	16.8	16.8	70.505	0	227.25	499290000	37	29729000	4650500	8721600	49537000	103720000	63712000	36810000	101750000	34823000	3952100	27238000	34644000	1	2	0	4	5	7	5	5	2	3	2	1
177250000	144850000	231140000	623960000	786120000	299369984	1979200000	1436600064	1176800000	2165799936	1840199936	1812199936			+	4	4	4	25.1	25.1	25.1	24.409	0	126.46	11555000000	62	172840000	144820000	299800000	782000000	751250000	418610000	1191600000	806600000	1987000000	86385000	2264700000	2649500000	1	2	2	6	4	2	11	3	7	4	8	12
3278400	3347900	2882300	5539900	2644100	5529600	1482700	5364400	2289500	4383800	3555300	0			+	6	6	6	23.3	23.3	23.3	39.234	0	135.15	32649000	15	2651200	4673600	2224100	13406000	980740	1657200	1646600	970070	1959000	1878800	601890	0	3	2	1	4	1	1	0	1	0	1	1	0
2262700	3768500	1765300	19025000	22327000	15477000	47910000	8360800	34894000	26973000	12402000	52526000			+	63	10	5	46.4	8.8	3	192.79	0	137.12	224080000	14	1930400	3719800	1627400	38916000	24778000	16956000	39163000	8690500	31425000	4445000	13318000	39112000	0	0	0	4	1	0	2	0	3	2	0	2
3324100	7477800	6478500	2763600	2231500	3274100	2961200	11649000	13115000	12520000	18698000	14205000			+	21	2	0	37.5	6.3	0	68.889	0	70.295	77276000	13	2277400	3281600	6059800	2075600	3000300	752990	3073300	10727000	11267000	4075400	16894000	13792000	0	2	2	0	1	1	0	1	1	1	1	3
20916000	40154000	17754000	7042800	12978000	10335000	16514000	31979000	49393000	27096000	93400000	65490000			+	16	3	3	29.6	6.1	6.1	68.709	0	108.18	345030000	22	27856000	16695000	27487000	9602400	1495600	5542300	12043000	30590000	61270000	5283500	68679000	78485000	1	1	0	0	1	0	1	3	2	1	7	5
482409984	288420000	216950000	2556000000	408390016	742289984	976630016	513980000	777059968	706280000	358620000	801489984			+	9	9	9	90.8	90.8	90.8	15.184	0	266.3	8273000000	186	612010000	228520000	232030000	2408800000	581300000	1229600000	1007800000	307790000	699770000	99372000	286050000	580030000	7	1	1	28	22	28	18	15	24	11	7	24
16698000	14860000	12872000	89374000	17954000	24752000	16275000	0	14038000	4480700	4637400	22738000			+	5	1	1	32.4	8.3	8.3	15.954	0	11.788	232640000	3	20839000	11555000	17561000	78573000	24696000	29793000	13956000	0	16168000	672410	2662700	16162000	0	0	0	1	0	0	1	0	0	0	0	1
20461000	34328000	2618400	603670	1090100	505900	2252900	144860000	6459900	3630100	1841300	7389700			+	13	10	6	30.5	25.6	16.3	51.621	0	197.35	192090000	18	15756000	23632000	829320	669600	1114800	358510	3237000	126610000	8111100	1257800	5600000	4910200	0	0	0	0	0	0	2	9	2	2	2	1
15707000	12676000	26159000	33848000	48673000	62255000	27941000	67740000	22432000	12720000	20937000	22046000			+	7	7	7	11.9	11.9	11.9	67.011	0	90.48	344060000	11	9124000	6162600	18081000	47260000	79062000	86421000	16428000	26717000	18565000	623960	14475000	21136000	0	0	1	1	3	0	2	3	0	0	0	1
4878200	11506000	4758800	53222000	92390000	89333000	21399000	9317000	37697000	10927000	30594000	25471000			+	10	10	10	19.9	19.9	19.9	53.339	0	117.24	365930000	29	2044200	3994700	10716000	78261000	76122000	58223000	37136000	10652000	34712000	2857300	23559000	27649000	0	1	2	4	3	3	3	0	5	0	5	3
25546000	37441000	85400000	14605000	36907000	69988000	808390016	329440000	291080000	110860000	289120000	378590016			+	35	30	30	62.2	56	56	69.366	0	323.31	2279600000	112	12335000	15944000	26037000	13999000	420330000	19510000	671380000	442830000	267760000	29049000	122060000	238380000	3	0	4	3	5	4	16	18	22	2	12	23
28977000448	28906000384	24696999936	2061200000	1686700032	1807200000	2408300032	1994000000	6035700224	4728300032	3000399872	3182899968			+	59	59	54	79.9	79.9	73.6	69.293	0	323.31	99299000000	875	25094000000	24220000000	28682000000	1575500000	1442900000	1334100000	2649000000	1731500000	5636600000	628200000	3169700000	3135100000	134	132	144	48	51	52	44	44	78	36	56	56
0	0	0	6626700	0	5050700	12947000	5351800	12463000	19029000	16281000	20199000			+	3	3	3	15.7	15.7	15.7	24.241	0	78.129	75009000	7	0	0	0	7628300	0	2316600	16154000	3702200	10231000	5404500	11398000	18173000	0	0	0	1	1	0	0	1	0	0	1	3
354630	340630	261020	188400	0	427610	655630	472490	888990	425040	0	696960			+	3	3	3	2.2	2.2	2.2	138.44	0	17.597	2951200	2	52783	1369300	32876	16767	0	60936	188140	82334	110040	298210	0	739820	0	0	0	0	0	0	0	0	1	1	0	0
1073000	4011000	4484500	22060000	35710000	5110900	183540000	30535000	83493000	539129984	158480000	139290000			+	24	24	15	44.3	44.3	31.7	66.017	0	323.31	732270000	68	1084600	1048800	3484300	22939000	23599000	2995800	165980000	58122000	67328000	122160000	119960000	143570000	1	2	0	2	4	0	8	3	10	19	10	9
52452000	86812000	45542000	152280000	193030000	315990016	133590000	57932000	100290000	105840000	96795000	170940000			+	29	29	29	35.8	35.8	35.8	91.215	0	323.31	1376100000	99	29856000	29767000	47399000	235830000	331690000	187120000	96113000	20421000	89966000	17896000	108490000	181570000	4	4	3	14	15	6	10	3	12	10	9	9
0	0	0	0	0	0	0	3155600	562890	0	0	0			+	8	1	1	16.9	2.7	2.7	51.267	0	26.17	3340900	1	0	0	0	0	0	0	0	2773000	567820	0	0	0	0	0	0	0	0	0	0	1	0	0	0	0
1997400064	3192900096	4906800128	603059968	213830000	426260000	933379968	377129984	1018700032	1427699968	684140032	830120000			+	17	17	17	53.5	53.5	53.5	38.418	0	323.31	15691000000	445	2670300000	1686500000	4464300000	1042100000	339130000	674210000	1033600000	532870000	1507500000	136750000	877380000	726480000	47	54	54	44	26	33	31	21	36	25	35	39
3367000	20124000	11211000	19146000	47865000	15627000	254430000	89382000	94272000	40924000	118370000	105710000			+	19	17	16	32	29.7	28.2	59.51	0	314.26	739590000	36	284820	9184400	6517400	31152000	54554000	7785200	160590000	138270000	94264000	13061000	117320000	106610000	0	1	0	3	1	1	7	5	2	3	3	10
0	1033900	1033000	1109600	2622700	872910	3093800	57086000	14100000	5687000	16461000	5071500			+	11	6	2	16.3	10	3.6	62.378	0	71.359	87089000	8	0	7712.4	591730	116390	1298400	324710	6250000	53772000	8988600	3299100	8498000	3941500	0	0	0	1	1	0	0	3	1	1	1	0
362889984	159980000	624129984	2176499968	1132999936	773769984	1915100032	802489984	1193100032	3012900096	499120000	787350016			+	25	25	25	69.1	69.1	69.1	30.276	0	323.31	12074000000	317	218580000	242050000	419500000	2518000000	1542400000	1404400000	2079900000	840880000	1279200000	305740000	244740000	979200000	14	8	7	45	55	40	36	23	27	20	21	21
25596000	8964400	11516000	11272000	14712000	20515000	5400000	10386000	7080400	50719000	4841600	18590000			+	8	8	8	33.6	33.6	33.6	38.252	0	61.432	159360000	14	15588000	8687300	22471000	21486000	21289000	35699000	2181900	18640000	1643500	5307700	154930	6207400	1	1	1	0	1	0	1	0	4	4	0	1
0	5430100	7572200	32321000	3597800	15311000	3394200	839540	2111200	3104900	1541800	1124000			+	7	7	7	15.9	15.9	15.9	51.113	0	186.31	72290000	14	0	271840	607230	31848000	7491300	11135000	11696000	1094100	2848300	1208100	1712800	2376900	1	0	1	5	0	2	2	1	1	0	1	0
0	0	0	0	0	0	0	12431000	499400	0	330020	0			+	2	1	1	3	1.5	1.5	63.91	0.0047393	6.5349	11754000	1	0	0	0	0	0	0	0	10444000	965960	0	344010	0	0	0	0	0	0	0	0	1	0	0	0	0
74740000	69087000	37964000	13423000	16222000	10219000	17634000	12994000	10165000	4253800	10618000	15792000			+	11	11	11	34.1	34.1	34.1	54.71	0	181.12	268640000	18	50619000	37529000	65717000	14783000	9292600	12440000	10604000	22185000	16172000	1987900	18996000	8317100	5	3	5	2	0	0	1	0	1	0	1	0
4282800128	3419500032	3737600000	449020000	569200000	1570000000	367040000	282649984	1290700032	420440000	302790016	485120000			+	23	23	23	50.5	50.5	50.5	46.103	0	323.31	15815000000	476	3221800000	2029300000	4182400000	501590000	813580000	2204200000	565780000	273840000	1008700000	123620000	261460000	628750000	71	75	72	42	46	61	13	10	44	8	7	27
0	161540	0	9944900	38701000	8666200	50822000	66730000	42724000	313020000	84481000	88190000			+	19	19	18	44.6	44.6	43.5	62.129	0	323.31	293630000	69	0	12112	0	5888300	20590000	3418200	23434000	27078000	31348000	111790000	43515000	26556000	0	1	0	1	6	3	6	6	7	18	11	10
1184500	4265800	1202900	6962800	10471000	4035500	76104000	44490000	50624000	15469000	38531000	31256000			+	18	15	11	34.9	30.7	24	65.865	0	167.28	234640000	32	464110	3907200	458600	8995700	11239000	2345600	38884000	46317000	46108000	9360100	36524000	30038000	0	3	0	2	2	0	4	2	5	5	5	4
80915000	87284000	58818000	42983000	110600000	64042000	32312000	92977000	53592000	64743000	79677000	42544000			+	19	19	19	45.2	45.2	45.2	52.347	0	323.31	744710000	63	90284000	66232000	98476000	42977000	139100000	48800000	33085000	53502000	70072000	5051500	50097000	47033000	7	4	5	3	5	7	3	7	7	2	6	7
9760800	18887000	21923000	58681000	40845000	74171000	57200000	27037000	47615000	39211000	33424000	59018000			+	12	12	12	28.6	28.6	28.6	51.723	0	239.04	412330000	37	16475000	5818800	32023000	96437000	29214000	28031000	55559000	9286800	47176000	20211000	21940000	50156000	3	2	2	3	6	2	3	2	4	4	3	3
42873	25409	0	0	0	0	259430	0	59754	0	116830	330480			+	1	1	1	19.7	19.7	19.7	6.0282	0	9.7963	777310	2	47674	15012	0	0	0	0	216680	0	79130	0	176430	242390	0	0	0	0	0	0	1	0	0	0	0	1
0	0	0	513750	237130	132580	250560	775280000	12207000	139860	11041000	469630			+	28	13	8	53.6	29.2	19.3	55.802	0	209.34	706550000	17	0	0	0	7212900	962670	92470	1286100	632270000	30204000	165430	30898000	3454500	0	0	0	0	0	0	0	15	1	0	1	0
4870000	9306200	9464000	69588000	49951000	9508300	3117000	10520000	5681600	1106500	1513800	4754100			+	5	5	5	50	50	50	11.202	0	166.4	185760000	31	5884500	2965500	8486700	82682000	40510000	3209000	22277000	8368900	7803500	103490	1775300	1691400	2	2	4	6	4	1	3	5	1	0	2	1
1878100	1466500	1748300	35480000	40736000	30652000	91797000	144610000	23583000	44038000	180510000	76017000			+	8	8	8	31.3	31.3	31.3	35.979	0	286.04	588150000	31	6822600	2705200	3849700	35182000	44167000	41999000	87797000	113370000	38304000	7653800	144900000	61393000	0	0	0	5	2	3	3	3	2	4	5	4
501420	520730	396820	2769200	466160	2379600	0	0	0	0	0	502780			+	3	3	3	10.5	10.5	10.5	38.756	0	17.284	7101900	2	30616	734240	844020	3043200	26006	1979800	0	0	0	0	0	443990	0	0	0	1	0	1	0	0	0	0	0	0
1556600064	2891899904	1904099968	8625300	1301600	3492900	8161600	125040	146120000	142650000	2729300	8893400			+	41	41	38	67.9	67.9	64.4	75.829	0	323.31	6028000000	145	894690000	2169900000	2720300000	43439000	4559800	6281000	15741000	883980	142810000	10093000	5032400	14291000	42	32	36	4	3	2	3	0	14	3	3	3
23842000	29682000	30084000	107920000	22017000	100320000	54728000	10284000	31574000	46616000	9364000	31586000			+	17	17	17	22.2	22.2	22.2	99.55	0	224.33	447670000	37	17998000	17167000	25506000	92683000	16072000	124200000	61823000	10503000	43648000	6062800	5588700	26422000	4	3	5	5	3	3	4	1	3	2	1	3
13525000	32306000	28513000	75964000	29368000	16595000	20209000	19687000	21637000	30358000	10993000	11067000			+	12	12	12	16.9	16.9	16.9	101.24	0	195.58	280590000	19	19293000	14198000	16124000	42326000	15603000	56024000	63971000	13150000	25299000	4016600	8075700	2507400	0	1	0	5	4	2	3	0	0	0	2	2
5065200	8463000	15964000	51030000	11090000	28580000	0	1509600000	53420000	11706000	106510000	67360000			+	24	24	6	67.1	67.1	17.1	46.213	0	323.31	1641000000	45	748830	2415700	3978400	51160000	24070000	5972900	0	1334000000	46465000	5733300	119780000	46640000	0	1	0	2	0	0	0	34	2	0	4	2
0	0	0	0	0	0	0	8452600	0	0	0	0			+	27	2	1	45	4.6	1.8	54.971	0	39.877	7588600	1	0	0	0	0	0	0	0	7427800	0	0	160860	0	0	0	0	0	0	0	0	1	0	0	0	0
0	0	0	659020	0	0	628380	208420000	2207600	1848300	3385400	0			+	22	8	2	62.5	23.8	5.5	47.237	0	250.81	188330000	14	0	0	0	1462000	0	0	1231600	170220000	6612200	1107400	7696500	0	0	0	0	1	0	0	0	10	1	0	2	0
18913000	15689000	4745400	55841000	65021000	47596000	47432000	14072000	10447000	33945000	9496300	18522000			+	21	21	21	17.9	17.9	17.9	188.74	0	323.31	323130000	35	5615000	5271400	2807100	87217000	83145000	51327000	28752000	12754000	12765000	1843500	12857000	18778000	0	1	1	7	6	2	8	2	2	1	1	4
0	0	0	0	0	0	0	0	6292500	0	0	7397600			+	2	2	2	4	4	4	65.056	0	16.534	57164000	3	2079200	1683000	5798900	5201100	2828900	3382200	11008000	4313400	6122100	265480	7502400	6979300	0	1	0	0	0	0	1	0	0	0	0	1
7965500	9942200	7287700	15031000	24400000	18178000	21082000	25652000	9800500	10454000	60023000	58749000			+	3	3	3	19.2	19.2	19.2	24.536	0	125.67	237530000	13	8333400	5901500	10675000	18836000	20862000	13265000	20521000	26750000	9051900	2857700	50362000	50119000	2	0	1	1	1	1	1	2	2	2	0	0
0	0	3415800	2151200	0	0	1983100	0	1770600	2629700	1984800	2120000			+	3	3	3	4.9	4.9	4.9	68.886	0	20.789	14423000	8	0	0	3811300	2349700	0	0	2502300	0	1733300	558180	1584500	1884000	0	0	1	1	0	1	1	0	1	1	1	1
26012000	32415000	21546000	204740000	271510016	102890000	346289984	219500000	334529984	421369984	441460000	323140000			+	34	34	34	35.8	35.8	35.8	140.37	0	323.31	2234400000	120	10899000	21673000	25195000	251700000	187910000	80810000	334070000	179510000	343570000	112280000	365020000	321800000	1	0	0	10	12	3	16	16	16	11	16	19
3417400	1500100	1798900	29756000	57990000	15640000	20817000	71817000	27574000	4616500	70824000	38943000			+	16	16	16	8.3	8.3	8.3	248.98	0	165.4	317350000	31	6061700	1033400	3410100	27212000	85332000	26028000	19113000	50982000	16371000	677440	49614000	31511000	0	1	1	4	3	2	1	10	3	0	4	2
4710300	7608500	3908400	65208000	132900000	82252000	65917000	168950000	50120000	246990000	214300000	111700000			+	22	22	2	20.7	20.7	2.2	129.39	0	323.31	933230000	62	3320800	2617300	3550800	73539000	111280000	75994000	102300000	171610000	47633000	39952000	143150000	158300000	0	2	0	4	4	4	4	11	7	3	12	11
3387100	2493300	10428000	43587000	59873000	29343000	19192000	9685100	9480500	32304000	62468000	29444000			+	17	17	17	24.8	24.8	24.8	93.089	0	215.27	284120000	37	1920000	2385900	6135600	59044000	78595000	24772000	16582000	12408000	12756000	4083000	37518000	27917000	0	1	0	7	8	5	2	1	3	2	5	3
0	1690700	0	0	0	0	0	0	0	0	0	0			+	4	2	1	5.5	3.1	1.9	69.182	0	9.2278	1166900	1	0	1166900	0	0	0	0	0	0	0	0	0	0	0	1	0	0	0	0	0	0	0	0	0	0
7430200	0	1196100	20068000	0	6489000	6750000	0	5204300	2514000	0	1992000			+	5	5	5	15.6	15.6	15.6	38.348	0	50.844	51132000	11	7763000	0	943160	21314000	0	3744700	8592900	0	5035700	601850	0	3136400	0	0	0	5	1	2	1	0	2	0	0	0
0	2431800	0	4336500	7207000	10984000	5223300	0	4273000	0	8534700	0			+	3	3	3	8.7	8.7	8.7	48.821	0	17.689	38265000	2	0	539920	0	4011000	6779700	12703000	3763800	25456	2469100	0	7973000	0	0	0	0	2	0	0	0	0	0	0	0	0
384590	1106500	0	4209400	19379000	14984000	6769100	10121000	3371200	1680500	3244200	3673900			+	3	3	3	12	12	12	29.091	0	35.533	65118000	4	111920	258030	0	6089800	18423000	7756500	14591000	7780900	3500700	188620	2643800	3774300	0	0	0	0	2	1	0	1	0	0	0	0
14941000	12646000	29206000	81907000	95167000	154830000	277449984	201890000	254380000	718640000	280569984	204990000			+	8	8	8	49	49	49	22.144	0	287.93	1920500000	42	9606100	5423700	7686800	87958000	162700000	119970000	359800000	243820000	261670000	79372000	218390000	364130000	0	2	1	2	2	2	6	4	5	6	8	4
82240000	91304000	124980000	33712000	181380000	93511000	153740000	381300000	279420000	126290000	859769984	859000000			+	22	22	3	38.2	38.2	6.9	68.964	0	323.31	2837800000	104	82345000	136930000	199630000	47040000	239870000	103770000	94688000	386550000	364430000	34151000	837180000	311180000	2	5	7	3	8	5	7	16	13	7	22	9
0	0	0	0	0	0	0	0	671760	0	682960	1511900			+	4	4	4	6	6	6	86.858	0	42.307	2760200	3	0	0	0	0	0	0	0	137770	712020	0	604340	1306000	0	0	0	1	0	0	0	0	0	0	0	2
18181000	29333000	10730000	7792900	3092500	5864200	5104900	0	4133100	11960000	3029000	4728600			+	9	9	9	24.1	24.1	24.1	53.553	0	108.43	93370000	18	27677000	16674000	26187000	9427500	646950	4032900	2182400	0	4104900	1836100	98241	502640	3	3	2	1	0	1	3	0	3	2	0	0
0	0	484720	10479000	2705400	12958000	4686100	6590800	2127400	0	10812000	8379500			+	5	5	5	10.3	10.3	10.3	75.166	0	39.251	56810000	9	0	0	448750	14816000	12011000	11187000	6000200	6612400	2439500	178570	2105800	1010100	0	0	0	1	2	2	1	1	1	0	1	0
3534100	3870200	4407700	74049000	112770000	119990000	63401000	10732000	40055000	9120400	31398000	71039000			+	12	12	11	19.9	19.9	19.7	68.932	0	216.05	518380000	46	4387700	1546400	4458000	115920000	137860000	95397000	54781000	23734000	27473000	1459200	15977000	35390000	1	1	3	8	7	6	6	1	4	1	4	4
2102600	2573800	2638300	10977000	15105000	14455000	6268400	10336000	7286400	1868400	5997100	8660200			+	6	6	6	17.9	17.9	17.9	43.017	0	56.02	85019000	8	724380	190610	1446900	15176000	19271000	7698200	12538000	1952900	11663000	445310	1520200	12393000	0	0	0	1	2	0	1	0	1	1	1	1
88488000	51910000	80173000	480240000	354689984	344020000	260680000	171450000	199820000	333649984	352369984	263870000			+	28	28	28	34.1	34.1	34.1	85.411	0	323.31	2725000000	108	39427000	24046000	32470000	776850000	234530000	559090000	214380000	124150000	262380000	34208000	176000000	247430000	4	4	3	18	16	12	11	4	6	9	12	9
0	0	2101600	5113500	0	5021000	2355100	0	1915600	0	0	3284900			+	2	2	2	3.5	3.5	3.5	57.407	0	11.894	20062000	2	0	0	1608500	9322000	0	2996900	1832000	0	1172400	0	0	3129900	0	0	0	0	0	1	1	0	0	0	0	0
20611000	28940000	0	25352000	32764000	16186000	13900000	14101000	15095000	13047000	6606400	11018000			+	5	5	5	10	10	10	61.998	0	37.969	183290000	10	2062700	2806600	0	31435000	48218000	31513000	19887000	11481000	15645000	1221300	6586400	12436000	0	0	0	3	2	0	1	2	1	0	1	0
366630016	449900000	518460000	51002000	22884000	44734000	19781000	10519000	85332000	7292000	14441000	29187000			+	15	15	2	40.9	40.9	3.8	53.341	0	273.03	1512700000	44	397110000	356120000	521530000	44663000	7365500	32364000	31808000	4745500	73609000	2503600	4860500	36006000	7	9	12	3	1	1	1	0	6	3	1	0
14944000	24904000	33126000	354929984	777080000	503609984	911310016	1173200000	840590016	1744499968	2350500096	1720300032			+	31	31	2	43.7	43.7	2.3	85.686	0	323.31	9136900000	178	18045000	12456000	19318000	625750000	1442900000	848600000	852290000	1319800000	745850000	154650000	1313100000	1784100000	1	2	1	16	21	14	20	25	15	10	29	24
691489984	724259968	435529984	220400000	53828000	407460000	111050000	8756900	119640000	213750000	18432000	68909000			+	24	24	24	47.5	47.5	47.5	68.587	0	323.31	2833700000	82	645150000	517540000	557870000	403350000	64846000	335260000	81973000	4786700	134260000	9187100	8070500	71360000	18	16	14	11	2	3	7	0	5	4	1	1
27583000	14978000	98958000	0	0	0	0	0	2591300	0	0	0			+	7	7	7	34.7	34.7	34.7	23.182	0	53.961	148070000	12	24308000	20889000	102300000	0	0	0	0	0	568010	0	0	0	0	4	8	0	0	0	0	0	0	0	0	0
152920000	142310000	321369984	29738000	27536000	61868000	17240000	9048100	35919000	3245400	12029000	14131000			+	9	9	9	22.2	22.2	22.2	52.209	0	68.519	763700000	16	144000000	141470000	190620000	48965000	39522000	85944000	19023000	10528000	43157000	570560	11796000	28111000	3	5	2	1	1	1	1	0	0	1	0	1
96538000	78163000	106950000	189960000	245440000	327340000	100780000	43802000	96250000	91288000	73987000	100600000			+	26	26	26	36.1	36.1	36.1	101.51	0	323.31	1407500000	102	46132000	36464000	70090000	183670000	171130000	280360000	181950000	55271000	105040000	13398000	99120000	164850000	8	4	9	15	12	12	7	5	7	4	10	9
5745900	17130000	16070000	3039400	0	10957000	2445900	0	4911300	1729100	5473300	2328100			+	3	3	3	14.2	14.2	14.2	26.133	0	83.241	69233000	7	3728000	4038500	22704000	12295000	0	8252200	3746900	0	8212400	103050	2133500	4019900	1	2	1	1	0	0	0	0	1	0	0	1
7450400	5903400	9665800	24613000	43763000	5884000	12641000	31140000	15034000	27353000	25756000	13674000			+	8	8	8	21.1	21.1	21.1	54.099	0	149.05	204160000	42	3180800	2148900	6631800	37806000	70677000	12167000	10193000	18935000	8729600	3480700	22169000	8039800	1	2	2	5	11	5	2	5	3	0	4	2
750280000	776019968	655260032	246120000	26947000	405049984	41411000	11364000	63492000	12990000	6444500	3629600			+	11	11	11	42.9	42.9	42.9	42.663	0	239.49	2775700000	41	674800000	559240000	742230000	224460000	68810000	297500000	80887000	31046000	71390000	3098900	17544000	4734900	8	7	11	3	1	6	2	0	2	1	0	0
0	0	0	0	0	0	0	45275	0	0	0	0			+	24	1	1	41.2	3.7	3.7	54.195	0	7.0754	39786	1	0	0	0	0	0	0	0	39786	0	0	0	0	0	0	0	0	0	0	0	1	0	0	0	0
0	0	849810	0	0	0	0	0	0	0	0	0			+	2	2	2	8.5	8.5	8.5	43.315	0	21.478	977090	2	0	0	977090	0	0	0	0	0	0	0	0	0	0	0	2	0	0	0	0	0	0	0	0	0
0	0	0	0	0	0	0	0	0	2323800	989730	603430			+	2	2	2	3.4	3.4	3.4	282.39	0	11.514	2849300	3	0	0	0	0	0	0	0	0	0	171490	1689900	987900	0	0	0	0	0	0	0	0	0	1	1	1
0	0	0	0	37892	0	0	17638000	0	0	1233500	0			+	16	3	0	37.6	7.1	0	49.411	0	19.261	16286000	6	0	0	0	0	13407	0	0	11409000	0	0	4863500	0	0	0	0	0	0	0	0	3	1	0	2	0
15351000	23200000	16062000	116010000	196960000	35328000	43015000	157820000	45013000	209140000	263610000	76289000			+	18	18	18	58.4	58.4	58.4	46.228	0	323.31	1026000000	120	33678000	11623000	15170000	161520000	200990000	92043000	44083000	142860000	45612000	27290000	186060000	65018000	2	3	4	10	25	11	5	17	7	6	21	9
2203200	2590400	2592200	4786200	0	2965500	2163400	0	2324600	1630300	0	2064800			+	4	4	4	12.9	12.9	12.9	52.129	0	26.668	22412000	3	1371400	1308500	2182800	8667500	0	2164800	2773100	0	1540100	263760	0	2139700	0	0	0	1	0	1	0	0	0	0	0	1
0	0	0	13519	0	0	0	32327000	698120	0	1096600	53246			+	9	9	6	66.8	66.8	42.9	21.825	0	100.31	30103000	15	0	0	0	17411	0	0	0	28408000	812810	0	774570	90590	0	0	0	1	0	0	0	8	3	0	3	0
0	0	0	0	0	0	0	12983000	0	0	0	0			+	2	2	2	16.4	16.4	16.4	15.241	0	17.236	11409000	2	0	0	0	0	0	0	0	11409000	0	0	0	0	0	0	0	0	0	0	0	2	0	0	0	0
0	0	0	0	0	0	0	55465000	736320	0	0	0			+	6	3	3	32.4	16.2	16.2	22.406	0	26.207	49465000	4	0	0	0	0	0	0	0	48859000	605940	0	0	0	0	0	0	0	0	0	0	3	1	0	0	0
0	0	0	543020	0	0	0	82093000	995580	0	7569900	1588800			+	6	6	6	50	50	50	13.48	0	84.343	81406000	6	0	0	0	308930	0	0	0	77324000	95395	0	3341800	336230	0	0	0	0	0	0	0	4	0	0	2	0
4780100	5126600	4852300	29120000	66262000	19991000	17947000	19249000	15324000	80095000	43468000	33783000			+	14	14	14	48	48	48	45.296	0	285.64	243790000	43	423790	995510	4865800	27018000	43385000	8743900	18621000	17011000	24694000	23524000	33477000	41031000	1	0	0	4	8	1	5	3	5	2	7	7
0	0	0	0	0	199680	0	239570000	3245000	0	1646700	0			+	19	18	18	32.2	31	31	64.895	0	323.31	217880000	22	0	0	0	0	0	58169	0	209440000	4691000	0	3688500	0	0	0	0	0	0	0	0	19	2	0	1	0
293700000	272220000	199540000	329700000	237840000	375110016	120210000	20937000	82110000	62211000	26127000	65687000			+	22	22	22	26.5	26.5	26.5	106.19	0	323.31	1986700000	89	179390000	145720000	217600000	356110000	316100000	235840000	219020000	49372000	134810000	6311900	34987000	91453000	8	6	4	16	16	14	6	1	7	4	2	5
4925500	642530	2780100	12660000	0	5728900	1298700	0	1679300	2354000	0	2574400			+	5	5	5	17.5	17.5	17.5	46.017	0	44.98	34221000	12	5681300	515940	1723400	17421000	0	5883100	1049200	0	913320	226700	0	807370	2	2	1	4	0	0	2	0	1	0	0	0
120680000	82051000	115270000	16791000	26868000	56697000	14614000	16986000	85411000	4694700	7413200	17290000			+	11	11	1	29.2	29.2	2.9	46.236	0	251.26	536900000	20	171500000	85893000	143380000	8495600	10699000	18419000	7803600	8035800	66768000	416870	6909800	8574900	5	3	6	0	1	1	0	0	3	0	1	0
27906000	41340000	53899000	4119100	0	0	0	0	6591300	0	0	4084600			+	5	5	2	9.4	9.4	4.6	46.897	0	51.996	134340000	11	41054000	25124000	57966000	2138200	0	0	0	0	6244800	0	0	1812900	1	4	4	1	0	0	0	0	1	0	0	0
29743000	16990000	12835000	9301900	3889400	24040000	2217000	0	3120900	0	0	1094900			+	10	10	10	22.7	22.7	22.7	69.561	0	123.45	96732000	18	38160000	18097000	16123000	10561000	1802000	6584400	2458400	0	2530900	0	0	416450	9	2	4	1	0	2	0	0	0	0	0	0
0	0	0	0	0	0	0	0	0	0	0	0				1	1	1	2.6	2.6	2.6	56.775	0	8.1494	0	1	0	0	0	0	0	0	0	0	0	0	0	0	0	0	0	0	0	0	0	0	0	0	1	0
78085000	46499000	22695000	3166900	0	14807000	3631400	0	6580500	0	2917700	11230000				6	6	6	61.9	61.9	61.9	15.727	0	90.988	208590000	10	50060000	16942000	50069000	20615000	24771000	20310000	6041400	0	2716900	274860	6052500	10736000	4	3	1	1	0	1	0	0	0	0	0	0
0	0	0	0	0	0	1161700	0	306290	1154100	957420	898150				2	2	2	11.3	11.3	11.3	16.32	0	10.944	3355200	2	0	0	0	0	0	0	1305900	0	393590	270350	699790	685530	0	0	0	0	0	0	0	1	1	0	0	0
0	0	0	0	0	0	0	0	0	0	0	0				1	1	1	2.5	2.5	2.5	59.915	0	22.73	0	1	0	0	0	0	0	0	0	0	0	0	0	0	0	0	0	0	0	0	0	0	1	0	0	0
0	0	0	1086400	562230	0	0	0	0	0	0	0				2	2	2	6.1	6.1	6.1	52.045	0	18.382	1797400	2	0	0	0	1397100	400360	0	0	0	0	0	0	0	0	0	0	2	0	0	0	0	0	0	0	0
0	0	0	2488400	1461200	9413500	5145500	629260	2262800	1602400	0	3989000				2	2	2	6.7	6.7	6.7	54.51	0	16.894	25777000	4	0	0	0	9460500	423830	6189200	4303700	123240	2811600	176790	0	2288400	0	0	0	0	0	1	2	0	0	0	0	1
0	0	907650	2973300	0	1390500	0	0	0	0	0	0				2	2	2	4.4	4.4	4.4	51.297	0	17.858	5553900	4	0	0	902090	3697400	0	954410	0	0	0	0	0	0	0	0	0	2	0	1	0	0	1	0	0	0
35388000	35267000	24088000	169050000	7134200	29918000	56480000	7226900	31212000	116870000	5166500	27747000			+	23	23	23	70.2	70.2	70.2	51.424	0	323.31	466870000	79	25358000	36358000	49569000	163800000	9680900	37271000	52156000	3572200	36208000	22084000	1458900	29355000	2	2	6	18	1	9	11	3	8	6	1	12
0	0	0	0	0	0	901690	0	0	0	0	0				27	1	1	44.8	2.5	2.5	101.55	0	9.0456	940340	1	0	0	0	0	0	0	940340	0	0	0	0	0	0	0	0	0	0	0	1	0	0	0	0	0
6776800	1591700	0	3443400	2174100	0	3418400	2646000	2000600	11575000	2599400	10384000				3	3	3	31.1	31.1	31.1	16.265	0	29.549	44261000	4	18383000	699930	0	5342300	1859400	0	4877900	377540	1957100	411100	2772300	7580700	0	0	0	0	0	0	0	0	1	1	1	1
991489984	646720000	352780000	4260800000	722179968	1137600000	1768999936	266380000	834030016	2548300032	284409984	1139100032			+	14	14	10	90.3	90.3	66.2	15.859	0	323.31	14066000000	266	938840000	669110000	604650000	3992600000	907290000	2096100000	1707100000	299010000	892720000	116120000	186060000	1656200000	13	19	10	51	23	40	25	12	18	17	11	27
1130400	927230	0	4170100	3685000	5501300	4387300	0	0	862120	0	1721800				6	6	6	6.4	6.4	6.4	138.94	0	100.93	22072000	9	281800	276050	0	4244200	4903100	8205700	1973500	471830	1190000	41054	0	485130	0	1	1	1	0	2	1	2	1	0	0	0
0	0	0	2448400	9037500	2285700	2203000	1278100	941020	2840500	3070500	3898400				2	2	2	1.4	1.4	1.4	141.83	0	12.595	24456000	2	0	0	0	3338700	1152600	662850	6186700	1866800	1776500	713160	3134100	5624000	0	0	0	1	1	0	0	0	0	0	0	0
0	0	1368800	2177200	715070	1359100	1054000	680320	6832900	0	617690	643300				4	4	4	3.9	3.9	3.9	129.06	0	25.816	15858000	4	0	0	1771300	4899800	2212900	1206100	1867900	127790	2824800	0	98624	849030	0	0	0	0	0	0	1	0	2	0	1	0
0	530180	0	1062400	0	2026700	1101900	0	940260	0	0	1014600				1	1	1	3.3	3.3	3.3	33.886	0	7.1919	6054600	1	0	147590	0	966490	0	2481200	963320	0	778820	0	0	717120	0	0	0	0	0	0	0	0	1	0	0	0
0	0	0	1546300	0	798190	1693100	1823500	2227400	2122300	3051300	1920200				2	2	1	8.9	8.9	5	19.681	0	16.121	12535000	4	0	0	0	1826300	0	563720	1677100	1752200	2134100	527210	2384200	1670300	0	0	0	0	0	0	1	0	1	0	1	1
926610	507940	3255000	13414000	70934000	35630000	28451000	108670000	31363000	25291000	89650000	33515000				23	23	23	13.6	13.6	13.6	272.15	0	323.31	392530000	49	854640	804640	2617500	35427000	125710000	35914000	32710000	54592000	25107000	6497500	45822000	26473000	0	0	0	3	8	2	5	7	3	6	12	3
0	0	0	0	0	0	632910	1380700	0	562710	1287600	0				1	1	1	0.9	0.9	0.9	148.31	0	7.716	3051800	2	0	0	0	0	0	0	734240	1168400	0	129110	1020100	0	0	0	0	0	0	0	0	1	0	0	1	0
3261300	0	0	18605000	10790000	11503000	3808800	7160100	3832000	2843300	8007700	6490500				2	2	2	8.1	8.1	8.1	35.868	0	11.685	69533000	6	1046300	0	0	12614000	10712000	15739000	4563200	6603200	4809000	339140	6535200	6572300	0	0	0	1	1	0	0	2	0	1	1	0
0	4162700	2867800	17405000	20047000	46641000	17575000	13572000	19474000	24917000	10720000	16825000				9	9	9	20	20	20	50.243	0	82.717	181260000	18	0	2451300	2287600	36706000	26010000	31308000	16664000	13998000	16428000	355880	16760000	18287000	1	1	0	2	1	6	3	1	2	0	1	0
14998	0	0	26799	39116	129340	203290	0	70268	0	198760	239030				2	2	2	8.4	8.4	8.4	27.931	0	25.559	856280	5	13254	0	0	30821	43174	73361	151430	0	92160	0	116790	335290	0	0	0	0	0	1	1	0	0	0	1	2
6028700	3204600	8728300	46389000	44667000	46833000	162040000	90609000	151440000	86496000	70031000	83861000				11	11	11	44.2	44.2	44.2	34.015	0	143.98	713250000	39	3252400	3715500	6354900	52954000	73256000	40257000	84259000	78164000	113640000	11032000	97315000	149050000	0	0	0	2	2	2	5	7	6	1	6	8
148820	0	103870	0	0	0	181170	538520	0	0	0	0				2	2	2	0.9	0.9	0.9	242.48	0	12.237	979590	2	118350	0	283850	0	0	0	278610	298780	0	0	0	0	1	0	0	0	0	0	0	1	0	0	0	0
0	0	0	0	0	0	5307600	7247300	0	2027400	3787700	3751500				2	2	2	21.8	21.8	21.8	16.938	0	48.523	17582000	4	0	0	0	0	0	0	5212300	1972400	0	875170	3883100	5639100	0	0	0	0	0	0	0	0	0	2	1	1
0	0	559040	228370	1129400	1340600	809830	411870	0	0	312880	460230				2	2	2	4.6	4.6	4.6	41.06	0	12.324	5168400	5	0	0	1253900	140790	1786600	583070	561760	203310	0	0	134980	503960	0	0	0	1	2	1	0	0	0	0	0	1
5926000	14932000	16317000	3297000	4859500	0	4388900	0	5413200	0	4319600	4394800				2	2	2	11.5	11.5	11.5	21.068	0	18.616	60475000	2	17161000	12872000	18897000	2687300	1941300	0	1680300	0	2472500	0	1284000	1479500	0	0	1	1	0	0	0	0	0	0	0	0
0	0	0	1436400	0	0	2925600	0	1886700	3143300	1475300	0				1	1	1	16.7	16.7	16.7	10.692	0	93.541	8618600	3	0	0	0	1558300	0	0	3587200	0	1797000	662710	1013400	0	0	0	0	1	0	0	0	0	0	1	0	1
0	0	0	3385300	5426300	9672900	8063700	8573600	9870900	1756000	8587600	12872000				3	3	3	10	10	10	31.57	0	19.546	62266000	7	0	0	0	3719700	6439200	4690800	16074000	4212100	11432000	760790	9019800	5918000	0	0	0	1	1	0	1	1	2	1	0	0
0	0	0	808460	0	1303900	557880	0	0	0	0	591510				1	1	1	7.7	7.7	7.7	17.6	0	9.3026	3071300	2	0	0	0	882880	0	1004600	604390	0	0	0	0	579450	0	0	0	1	0	1	0	0	0	0	0	0
14018000	8983300	18050000	1268200	4938000	8942300	2518100	7635000	6529700	1121300	7219400	5148000				3	3	3	11.3	11.3	11.3	37.994	0	96.854	78264000	14	21016000	17582000	13432000	2307300	2705300	3920500	1540000	3532200	4705100	55429	4746300	2722000	2	1	0	1	2	0	1	1	3	1	2	0
0	0	0	0	41326	48920	95045	74853	75539	0	44140	90767				1	1	1	6.5	6.5	6.5	28.794	0	7.4198	441460	3	0	0	0	0	41197	39403	106010	64968	75491	0	30076	84316	0	0	0	0	1	1	0	0	0	0	0	1
0	0	0	0	0	0	0	0	209170	0	0	0				1	1	1	13.5	13.5	13.5	17.114	0	7.5869	211000	1	0	0	0	0	0	0	0	0	211000	0	0	0	0	0	0	0	0	0	0	0	1	0	0	0
275540	793070	661770	4305000	6440000	2446100	21600000	14097000	35619000	1050600	80447000	86924000				7	7	7	23	23	23	44.47	0	134.17	227480000	20	554780	606140	31628	7878800	9180900	4844800	24785000	11185000	42867000	4108800	70864000	50571000	0	0	0	0	1	0	3	1	4	2	5	4
273220	268000	451510	21030000	126100000	82274000	78420000	58865000	19277000	15127000	35126000	37293000			+	15	15	14	23.7	23.7	22.4	82.362	0	215.41	421520000	70	3979500	31524	6922400	60356000	71484000	76780000	66191000	49483000	18278000	7203300	33852000	26958000	1	1	0	10	13	5	8	6	8	3	7	8
0	0	0	0	0	0	0	0	0	0	0	341160				1	1	1	5.4	5.4	5.4	18.45	0.0091324	6.3415	1156900	0	0	7732.3	0	15743	33832	23878	331660	0	0	30129	401540	312430	0	0	0	0	0	0	0	0	0	0	0	0
0	0	0	0	0	0	0	2678300	0	0	0	0				1	1	1	9.1	9.1	9.1	14.678	0	9.231	2353600	2	0	0	0	0	0	0	0	2353600	0	0	0	0	0	0	0	0	0	0	0	2	0	0	0	0
0	0	0	77209	0	0	99472	93444	384730	0	0	84122				4	3	3	8.8	7.3	7.3	53.727	0	23.689	6818100	1	0	0	5692700	88857	0	42999	136650	101620	322440	346960	0	85823	0	0	0	0	0	0	0	0	1	0	0	0
0	0	0	0	0	0	3617800	3065300	2552700	980480	5725300	3991300				1	1	1	2.2	2.2	2.2	45.487	0	6.6495	17623000	3	0	0	0	0	0	0	3947100	2666700	2398400	215240	4727000	3668400	0	0	0	0	0	0	0	0	0	1	1	1
0	28877000	24847000	6595700	7337600	0	8651700	0	0	0	9146300	0				2	2	2	2.6	2.6	2.6	94.602	0	11.734	81919000	3	0	27888000	34398000	2372700	5252100	0	3782500	2639600	183780	0	3334700	2067700	0	0	0	0	1	0	0	1	0	0	0	1
0	0	0	677060	1350800	1461300	1452100	1551100	1214300	0	0	0				1	1	1	1.3	1.3	1.3	128.93	0.0092593	6.4315	7254100	1	0	0	0	390230	1194400	1282400	1663200	1598900	1125000	0	0	0	0	0	0	0	1	0	0	0	0	0	0	0
0	0	0	379950	542290	0	938640	865090	902630	0	850980	1247400				1	1	1	1.3	1.3	1.3	88.093	0.009434	6.4765	5431400	1	0	0	0	212900	378680	0	1203900	861690	1076900	0	780590	916850	0	0	0	0	0	0	0	0	0	0	0	1
0	0	0	1273900	0	0	1668700	0	0	849980	1504700	875190				3	3	3	7.3	7.3	7.3	74.407	0	25.633	5813000	5	0	0	0	1604000	0	0	2429400	138500	0	138770	1157300	345060	0	0	0	0	0	0	1	1	0	0	1	2
28301000	16606000	44677000	242440000	62243000	141000000	251740000	24709000	90218000	31415000	14104000	55840000				13	13	13	42.4	42.4	42.4	41.792	0	177.83	936480000	28	27979000	23133000	43387000	260960000	75932000	215400000	136550000	25015000	59028000	8432300	7900100	52762000	2	1	3	7	2	1	6	1	1	3	1	0
0	0	0	1426700	0	0	0	0	0	0	0	0				1	1	1	6.5	6.5	6.5	20.987	0	12.349	1605900	1	0	0	0	1605900	0	0	0	0	0	0	0	0	0	0	0	1	0	0	0	0	0	0	0	0
0	0	0	0	0	24264	0	105410	0	0	0	0				2	2	2	19.4	19.4	19.4	11.367	0	12.965	13616000	1	0	0	13504000	0	0	19267	0	92632	0	0	0	0	0	0	0	0	0	0	0	1	0	0	0	0
0	0	0	0	693130	0	0	0	1253200	0	0	0				2	2	2	12.2	12.2	12.2	17.869	0	13.309	1945300	4	0	0	0	0	681190	0	0	0	1264100	0	0	0	0	0	0	2	0	1	0	0	1	0	0	0
0	0	1102600	3121800	0	7168100	1131000	5947300	1349100	0	0	0				3	3	2	14.7	14.7	10.6	27.745	0	100.48	18532000	6	0	0	1357600	3639100	0	5852600	1271200	4882800	1271500	0	0	257240	0	0	0	1	0	1	1	1	1	0	0	1
81177000	87820000	92848000	54970000	99362000	61050000	6162700	40625000	14405000	0	42556000	24677000				5	5	5	13.4	13.4	13.4	50.14	0	31.109	606610000	8	57652000	46570000	86717000	238020000	84888000	25893000	8603000	18966000	6538700	0	20705000	12065000	0	0	0	1	0	0	2	1	1	0	2	1
762720	543070	0	577850	1048600	1309700	721220	0	307520	0	0	0				1	1	1	1.1	1.1	1.1	92.601	0	6.756	4873600	3	814000	400020	0	530170	1024700	1113600	660100	0	331070	0	0	0	1	1	0	0	0	0	0	0	1	0	0	0
0	0	0	0	0	0	0	0	0	0	0	150740				1	1	1	1.2	1.2	1.2	261.89	0	6.5696	138040	0	0	0	0	0	0	0	0	0	0	0	0	138040	0	0	0	0	0	0	0	0	0	0	0	0
0	0	0	6751100	1167400	0	0	0	0	0	0	0				1	1	1	3.1	3.1	3.1	49.924	0	7.9361	8746100	1	0	0	0	7598900	1147200	0	0	0	0	0	0	0	0	0	0	1	0	0	0	0	0	0	0	0
0	0	0	0	0	0	0	0	0	0	0	577680				1	1	1	16.3	16.3	16.3	10.281	0.0092166	6.4066	2283600	0	0	0	0	0	0	0	0	0	0	642520	1112000	529030	0	0	0	0	0	0	0	0	0	0	0	0
0	0	0	0	0	0	355370	366500	289710	0	433370	356580				2	2	2	0.9	0.9	0.9	312.25	0	12.628	1649500	2	0	0	0	0	0	0	350910	314490	225580	0	447180	311330	0	0	0	0	0	0	0	0	0	0	1	1
0	0	0	14764000	53363000	53194000	61763000	55097000	29423000	102910000	73752000	93608000				9	9	9	19.8	19.8	19.8	67.16	0	105.01	468440000	19	0	0	0	3380800	42125000	37069000	68198000	50322000	52533000	7203300	88681000	118930000	0	0	0	2	1	0	2	3	1	2	5	3
3041500	0	0	3417100	1744600	0	24922000	21731000	9242700	0	13484000	21435000				2	2	2	3.5	3.5	3.5	112.24	0	12.148	94535000	4	1940200	0	0	2550700	1714900	0	33425000	14379000	10303000	0	11625000	18599000	0	0	0	0	1	0	0	1	1	0	0	1
0	0	0	1047100	3333200	4242500	1264600	2702200	1903500	337950	2184200	3702900				2	2	2	12	12	12	27.89	0	84.735	18800000	10	0	0	0	1457200	3415600	3655700	1607400	1067300	2030100	76290	1878400	3611800	0	0	0	1	1	1	1	1	1	0	2	2
0	0	0	158280	261500	489850	1199500	1078800	1235500	197740	1997800	5654900				3	3	3	13.1	13.1	13.1	24.967	0	33.079	11114000	13	0	0	0	103480	149280	230140	726590	550620	1584300	25123	2219700	5525200	0	0	0	1	2	1	2	1	1	0	1	4
0	0	0	224780	237350	662090	0	0	0	0	0	0				1	1	1	1.4	1.4	1.4	124.95	0	28.111	1008900	4	0	0	0	249360	222380	537120	0	0	0	0	0	0	0	0	0	2	1	1	0	0	0	0	0	0
0	0	0	483530	0	0	0	4696700	0	0	0	0				7	1	0	11.8	2	0	59.035	0	8.7252	4671500	1	0	0	0	544240	0	0	0	4127300	0	0	0	0	0	0	0	0	0	0	0	1	0	0	0	0
0	0	0	0	0	0	0	1080600	0	0	0	20177				1	1	1	1.4	1.4	1.4	86.527	0.0090909	6.2807	968030	1	0	0	0	0	0	0	0	949550	0	0	0	18478	0	0	0	0	0	0	0	1	0	0	0	0
0	0	0	1810800	1103200	1976100	0	0	0	0	0	0				1	1	1	2.3	2.3	2.3	76.608	0	8.581	4763700	1	0	0	0	1851800	947480	1964500	0	0	0	0	0	0	0	0	0	1	0	0	0	0	0	0	0	0
0	0	0	0	0	0	2164500	0	1941300	13472000	2289300	3595100				3	3	3	4.8	4.8	4.8	79.972	0	55.337	18269000	4	0	0	0	1411100	1746200	0	3452800	0	1894200	2382300	2281800	5100100	0	0	0	0	0	0	0	0	1	1	0	2
0	0	97066	0	0	0	0	0	0	0	0	0				2	2	2	3.9	3.9	3.9	70.258	0	17.765	111600	2	0	0	111600	0	0	0	0	0	0	0	0	0	0	0	1	0	0	1	0	0	0	0	0	0
0	0	313320	551650	4102000	1302100	0	2860400	1357500	1042700	12396000	0				1	1	1	1.1	1.1	1.1	79.934	0	6.6081	20228000	2	0	0	258010	590060	2859000	1509600	0	5439300	2041400	297990	7232400	0	0	0	0	0	1	0	0	0	0	0	1	0
0	0	0	0	522440	0	388440	697020	917310	1088400	503480	591080				3	3	3	6.5	6.5	6.5	50.133	0	25.125	3381200	4	0	0	0	0	341360	0	413990	543300	1080200	329770	265380	407170	0	0	0	0	0	0	1	0	1	0	1	1
0	0	0	0	0	0	0	0	0	0	0	0				21	1	1	19.7	1.2	1.2	129.53	0	84.451	0	1	0	0	0	0	0	0	0	0	0	0	0	0	0	0	0	1	0	0	0	0	0	0	0	0
0	0	0	0	0	0	0	0	0	0	0	0				2	2	1	2	2	2	72.082	0	9.3467	0	1	0	0	0	0	0	0	0	0	0	0	0	0	0	0	0	0	0	0	0	0	0	0	0	1
0	0	0	221120	1021300	857440	594230	432570	494440	0	677630	902800				3	3	3	4	4	4	104.54	0	32.177	4619300	4	0	0	0	33257	478680	1719300	768950	181330	99659	0	130400	1207600	0	0	0	0	1	0	2	0	0	0	0	1
0	0	0	162560	0	0	351670	372270	292330	0	1357100	294290				3	3	3	4.9	4.9	4.9	67.974	0	16.11	2486100	2	0	0	0	26884	0	0	476840	540270	55153	0	1336200	50745	0	0	0	0	0	0	0	0	0	0	2	0
0	0	0	1321100	3990500	4712100	5539300	8335500	6834200	7150400	3903200	4110000				2	2	2	8.9	8.9	8.9	26.399	0	16.146	43741000	2	0	0	0	9957400	147350	3025300	8428000	6648600	4750100	105300	4779700	5899600	0	0	0	1	0	0	1	0	0	0	0	0
4473800	3196700	1275200	35825000	46944000	30663000	11893000	46457000	27709000	2451500	45888000	41374000				5	5	5	9.3	9.3	9.3	70.993	0	47.266	276620000	12	7261500	7371100	80559	50688000	66316000	38466000	9786800	22528000	17212000	348990	30285000	26277000	0	0	0	4	1	1	0	2	2	1	0	1
0	0	0	0	0	0	0	0	0	0	0	0				2	1	1	5	2.7	2.7	49.67	0	9.76	0	1	0	0	0	0	0	0	0	0	0	0	0	0	0	0	0	0	0	1	0	0	0	0	0	0
837970	0	0	0	1068300	2991600	1029500	1309800	0	0	1611300	0				3	3	3	16.4	16.4	16.4	40.463	0	22.19	7518600	5	329730	0	0	0	526640	2996900	519040	1462300	0	0	1684100	0	0	0	0	1	0	2	0	0	0	0	1	1
0	0	0	0	0	321010	484330	1117100	558180	0	556350	539340				1	1	1	3	3	3	44.859	0.0093897	6.4594	3280900	2	0	0	0	0	0	221450	539000	899700	645050	0	419490	556210	0	0	0	0	0	0	0	1	0	0	1	0
691720000	879089984	722960000	3935800064	3046400000	2733100032	986430016	459390016	911219968	1366800000	546790016	995609984			+	81	81	81	57.1	57.1	57.1	187.25	0	323.31	16206000000	373	395220000	251790000	458600000	3948600000	3953600000	3507400000	869700000	565050000	992690000	84381000	344440000	834540000	11	18	18	72	69	55	26	14	27	17	18	28
3064200	0	0	43906000	13517000	12754000	69669000	21512000	47505000	98464000	21904000	47262000				4	4	4	27.5	27.5	27.5	21.401	0	103.97	319040000	24	383750	0	0	54576000	7489000	15394000	107630000	18448000	49812000	16343000	18905000	30059000	1	0	0	2	3	0	2	4	3	2	3	4
0	0	0	1903400	1400800	7247600	0	0	926200	0	0	1114400				1	1	1	1.4	1.4	1.4	75.782	0	6.7126	11720000	1	0	0	0	3680800	1740700	4491000	0	0	781110	0	0	1026600	0	0	0	0	0	1	0	0	0	0	0	0
0	0	0	172950	213140	792480	284160	0	332970	107550	0	341490				1	1	1	5	5	5	29.677	0	7.4735	2082700	1	0	0	0	144560	191690	435300	361560	0	480190	10864	0	458530	0	0	0	0	0	1	0	0	0	0	0	0
0	0	0	0	0	0	0	0	0	0	0	206310				2	2	2	6.9	6.9	6.9	47.637	0	11.726	188930	2	0	0	0	0	0	0	0	0	0	0	0	188930	0	0	0	0	1	0	0	0	0	0	0	1
0	0	0	0	0	0	1284300	0	0	0	1640600	1425800				2	1	1	2.6	1.6	1.6	105.97	0	69.87	3994800	3	0	0	0	0	0	0	1339400	0	0	0	1349600	1305800	0	0	0	0	0	0	0	1	0	0	1	1
0	0	0	3164800	4908000	10228000	3041100	0	1217200	0	7094900	2225300				3	3	3	9.1	9.1	9.1	51.272	0	58.887	27946000	7	0	0	0	3719100	4531500	12719000	1424800	0	283880	0	4422500	844820	0	0	0	1	1	3	1	0	0	0	1	0
0	0	0	0	0	0	0	0	0	0	1231000	0				1	1	1	1.6	1.6	1.6	82.905	0	9.3048	1012700	1	0	0	0	0	0	0	0	0	0	0	1012700	0	0	0	0	0	0	0	0	0	0	0	1	0
0	0	0	1029600	0	1303100	246190	0	0	0	0	0				2	1	1	9.8	5.7	5.7	27.764	0	56.614	2450400	2	0	0	0	1158900	0	1034700	256740	0	0	0	0	0	0	0	0	1	0	1	0	0	0	0	0	0
0	0	0	314820	58410	484080	306140	83173	172070	0	69294	294730				2	2	2	11.6	11.6	11.6	35.706	0	13.123	1661900	5	0	0	0	315190	51060	493900	283980	60462	172200	0	45053	240080	0	0	0	2	1	0	1	0	0	0	0	1
1248400	885320	1354000	0	895800	0	1489500	2873700	1326300	5268400	6046800	3622800				4	4	4	15.1	15.1	15.1	27.878	0	27.814	19553000	5	51454	17861	69591	1920000	1877500	0	2221900	2791900	2887600	1763100	1880200	4072400	0	0	0	0	0	0	1	0	1	0	2	1
0	0	0	0	0	0	0	0	0	0	0	269370				2	2	2	4.1	4.1	4.1	35.686	0	10.757	1051800	1	0	0	0	283680	107450	108410	138380	0	0	0	167200	246680	0	0	0	0	0	0	0	0	0	0	1	0
0	0	0	111130	68687	349200	200610	205910	113600	0	70049	211940				1	1	1	7	7	7	22.426	0	11.87	1226300	7	0	0	0	125080	67504	277290	209210	180940	114590	0	57627	194090	0	0	0	1	1	0	1	1	1	0	1	1
0	0	0	77049	133570	200640	190010	325600	175880	0	0	0				2	2	2	5.3	5.3	5.3	62.481	0	11.519	1020700	2	0	0	0	32365	84930	118620	182380	451230	151150	0	0	0	0	0	0	0	0	1	1	0	0	0	0	0
0	0	0	8662700	28910000	5544800	52955000	26763000	0	0	0	13573000				1	1	1	2.5	2.5	2.5	40.786	0	6.8897	136820000	4	0	0	0	7245000	22351000	2819500	75030000	18501000	0	0	1090100	9778200	0	0	0	0	1	0	0	1	0	0	1	1
450070	0	0	1932200	0	3322500	1878000	0	1684600	620970	0	4826600				1	1	1	4.8	4.8	4.8	26.689	0	28.876	13420000	1	113240	0	0	2349200	0	4900400	2056100	0	1600300	47150	0	2353500	0	0	0	0	0	0	0	0	0	0	0	1
2907900	3026200	0	6131300	3673400	4597200	2816500	5800000	3092000	953520	0	2552700				3	3	3	9.3	9.3	9.3	36.723	0	31.717	32184000	4	2485200	1954900	0	6696900	2920200	9089700	1427100	5099500	1663600	34307	0	812780	0	0	0	2	2	0	0	0	0	0	0	0
0	0	0	2366200	2404600	0	2306000	2073900	1979000	2077200	3443800	2156400				2	2	2	8.6	8.6	8.6	25.802	0	14.081	17065000	3	0	0	0	3323300	1729200	0	2139000	1881900	2342000	309010	2719100	2621500	0	0	0	0	0	0	1	1	0	0	1	0
0	0	0	0	966000	1550300	1078800	798020	0	401250	523820	1229800				1	1	1	8.4	8.4	8.4	18.518	0	8.0593	5749600	1	0	0	0	0	929960	1935300	1230700	567480	0	35712	228900	821620	0	0	0	0	0	0	0	0	0	0	0	1
0	504170	804950	3586200	11909000	8426900	35283000	40398000	19234000	905200	10874000	6107400				8	8	8	17.2	17.2	17.2	62.44	0	186.86	127980000	19	0	191080	526930	5451100	18243000	24656000	26176000	29310000	14089000	300500	6748000	2292300	0	0	0	1	1	2	4	4	2	0	4	1
0	0	0	56867	0	120180	66991	0	82250	0	0	86641				2	2	2	4.3	4.3	4.3	47.231	0	11.737	381400	2	0	0	0	39724	0	125160	67021	0	74475	0	0	75024	0	0	0	0	0	0	1	1	0	0	0	0
148960	152540	166650	777920	725290	2409800	2487500	0	753520	0	441610	0				2	2	2	4.2	4.2	4.2	69.871	0	41.496	7699600	5	19762	14079	26391	2541600	2288500	2319000	247970	0	173110	0	69240	0	0	0	0	2	0	2	1	0	0	0	0	0
0	625680	0	503090	0	912310	0	0	0	0	0	704370				1	1	1	1.4	1.4	1.4	87.466	0	6.7162	2377700	1	0	349770	0	584140	0	855570	0	0	0	0	0	588170	0	0	0	1	0	0	0	0	0	0	0	0
0	0	1763400	3098100	0	0	0	0	0	0	0	1330900				1	1	1	1.5	1.5	1.5	84.73	0	15.062	6769900	1	0	0	2413500	3261200	0	0	0	0	0	0	0	1095100	0	0	0	1	0	0	0	0	0	0	0	0
1378200064	1208499968	1456700032	471960000	310969984	443300000	207310000	274169984	307040000	455289984	373609984	214350000			+	58	58	58	53.8	53.8	53.8	167.57	0	323.31	6588300000	205	1423500000	1171400000	1438000000	522550000	469400000	515230000	119390000	266100000	256500000	28634000	222790000	154790000	26	24	36	20	15	7	12	12	17	7	16	13
0	0	12246	0	11816	0	23880	3032000	59199	0	47751	35607				3	3	3	5.2	5.2	5.2	81.82	0	38.429	2847800	4	0	0	20460	0	9365.1	0	28550	2569900	79658	0	94284	45648	0	0	0	0	0	0	0	3	1	0	0	0
0	0	1170500	4118200	1951200	2763400	5827000	5192200	3393600	21999000	18984000	30075000				5	5	5	35.3	35.3	35.3	21.063	0	220.45	67750000	9	0	0	328780	4310500	604790	823640	7804800	1281200	5488000	6401100	13018000	27689000	0	0	0	0	0	0	2	0	0	0	3	4
0	0	0	960410	0	395030	0	0	0	0	0	0				1	1	1	4.3	4.3	4.3	39.666	0	7.6846	1394700	1	0	0	0	1081000	0	313680	0	0	0	0	0	0	0	0	0	1	0	0	0	0	0	0	0	0
[truncated: 4 more columns]

## Sheet: table3
Table 3. Data transformed by log2
LFQ intensity DMEM_1	LFQ intensity DMEM_2	LFQ intensity DMEM_3	LFQ intensity NUAD_1	LFQ intensity NUAD_2	LFQ intensity NUAD_3	LFQ intensity ZFD_1	LFQ intensity ZFD_2	LFQ intensity ZFD_3	LFQ intensity ZWD_1	LFQ intensity ZWD_2	LFQ intensity ZWD_3	Only identified by site	Reverse	Potential contaminant	Peptides	Razor + unique peptides	Unique peptides	Sequence coverage [%]	Unique + razor sequence coverage [%]	Unique sequence coverage [%]	Mol. weight [kDa]	Q-value	Score	Intensity	MS/MS count	Intensity DMEM_1	Intensity DMEM_2	Intensity DMEM_3	Intensity NUAD_1	Intensity NUAD_2	Intensity NUAD_3	Intensity ZFD_1	Intensity ZFD_2	Intensity ZFD_3	Intensity ZWD_1	Intensity ZWD_2	Intensity ZWD_3	MS/MS count DMEM_1	MS/MS count DMEM_2	MS/MS count DMEM_3	MS/MS count NUAD_1	MS/MS count NUAD_2	MS/MS count NUAD_3	MS/MS count ZFD_1	MS/MS count ZFD_2	MS/MS count ZFD_3	MS/MS count ZWD_1	MS/MS count ZWD_2	MS/MS count ZWD_3
#!{Type}E	E	E	E	E	E	E	E	E	E	E	E	C	C	C	N	N	N	N	N	N	N	N	N	N	N	N	N	N	N	N	N	N	N	N	N	N	N	N	N	N	N	N	N	N	N	N	N	N	N
NaN	NaN	19.8049	NaN	NaN	NaN	NaN	NaN	NaN	NaN	NaN	NaN				1	1	1	22.5	22.5	22.5	13.988	0	38.188	1053100	1	0	0	1053100	0	0	0	0	0	0	0	0	0	0	0	1	0	0	0	0	0	0	0	0	0
NaN	NaN	19.7347	NaN	NaN	NaN	NaN	NaN	NaN	NaN	NaN	NaN				11	1	0	29.2	2.9	0	46.236	0	7.736	1003100	1	0	0	1003100	0	0	0	0	0	0	0	0	0	0	0	1	0	0	0	0	0	0	0	0	0
21.3958	23.0873	21.0097	18.297	NaN	NaN	NaN	NaN	18.7562	NaN	NaN	NaN			+	9	3	3	22.9	10.9	10.9	46.397	0	72.443	14013000	5	5335600	2861700	5733300	30771	0	0	0	0	52120	0	0	0	1	2	2	0	0	0	0	0	0	0	0	0
22.7822	24.0956	24.9129	21.4181	NaN	21.407	21.1799	NaN	21.4692	23.0431	NaN	NaN			+	3	1	1	4.8	2.4	2.4	46.941	0	44.206	72036000	3	16155000	12150000	33838000	3488600	0	1647700	1579600	0	2281700	895050	0	0	0	1	2	0	0	0	0	0	0	0	0	0
NaN	NaN	NaN	NaN	NaN	NaN	NaN	NaN	NaN	NaN	NaN	NaN				17	1	1	27.4	3.9	3.9	53.989	0	50.014	0	1	0	0	0	0	0	0	0	0	0	0	0	0	0	0	0	0	0	0	0	1	0	0	0	0
NaN	NaN	NaN	NaN	NaN	NaN	16.75	NaN	NaN	NaN	NaN	NaN				2	2	2	1.9	1.9	1.9	79.812	0	10.927	1070600	1	0	0	0	0	955620	0	114940	0	0	0	0	0	0	1	0	0	0	0	0	0	0	0	0	0
NaN	NaN	NaN	18.2995	17.8493	20.3477	19.03	24.8401	NaN	17.9252	19.1756	19.8038				2	2	2	30.1	30.1	30.1	15.328	0	55.454	31726000	2	0	0	2073800	480910	224950	5803300	1226600	17528000	0	55622	1184100	3148700	0	0	1	0	0	0	0	1	0	0	0	0
NaN	NaN	NaN	NaN	NaN	NaN	NaN	NaN	NaN	28.9379	NaN	NaN				1	1	1	5.8	5.8	5.8	38.133	0.0091743	6.3923	112480000	0	0	0	0	0	0	0	0	0	0	112480000	0	0	0	0	0	0	0	0	0	0	0	0	0	0
NaN	NaN	NaN	14.9029	16.1586	NaN	16.2563	16.7963	NaN	NaN	18.3121	16.2496				1	1	1	1.5	1.5	1.5	81.75	0	20.71	631930	1	0	0	0	15831	78810	0	95760	170600	0	0	187620	83313	0	0	0	0	0	0	0	0	0	0	1	0
21.1564	21.3623	21.7264	NaN	NaN	NaN	NaN	NaN	NaN	NaN	NaN	NaN				3	1	1	6.5	2.2	2.2	46.963	0	6.7298	8187300	2	2337300	1860600	3989400	0	0	0	0	0	0	0	0	0	0	1	1	0	0	0	0	0	0	0	0	0
NaN	NaN	NaN	NaN	19.5491	19.9799	NaN	18.7996	19.5677	NaN	18.1604	18.0465				2	2	2	16.5	16.5	16.5	56.854	0	11.631	3318200	3	0	0	0	0	378050	478040	0	465810	1198900	0	179780	617650	0	0	0	0	0	0	0	0	2	0	0	1
NaN	NaN	NaN	NaN	NaN	NaN	NaN	NaN	NaN	NaN	NaN	NaN			+	12	1	0	28.8	3.6	0	47.117	0.0093458	6.4353	0	1	0	0	0	0	0	0	0	0	0	0	0	0	0	0	0	1	0	0	0	0	0	0	0	0
26.9351	27.6662	27.5529	29.9083	29.5283	28.9219	30.9537	29.7823	30.2454	31.3311	29.6673	30.3479			+	68	68	14	49.5	49.5	11.7	192.99	0	323.31	10029000000	335	53658000	87451000	70155000	914620000	671590000	441620000	2408500000	890240000	1291700000	437090000	1055300000	1707100000	3	2	5	24	41	20	50	25	45	40	36	44
22.0068	22.3717	21.8147	20.9327	21.9132	20.5596	21.7303	NaN	21.6807	21.7133	22.6919	23.4658			+	3	3	3	38.9	38.9	38.9	11.756	0	64.376	42505000	6	6435500	6524000	9642500	2596500	3589900	958180	1216500	0	1371300	1158600	2931600	6080200	0	0	1	0	0	1	1	0	0	1	0	2
23.4769	23.5992	22.893	24.5065	24.9807	25.7022	23.3325	23.4419	23.6259	22.1476	24.0498	23.7298			+	8	8	8	14.6	14.6	14.6	77.456	0	323.31	192850000	26	14012000	12884000	9244400	40182000	27570000	39660000	6717200	10989000	13795000	1969600	9778100	6047800	4	2	2	1	3	2	3	2	3	2	2	0
20.4311	19.6279	19.8003	NaN	NaN	NaN	18.8428	NaN	19.471	20.5563	NaN	NaN			+	14	1	1	39.8	2.7	2.7	53.661	0	43.336	4377500	2	1585300	518160	972730	0	0	0	317030	0	589330	394930	0	0	0	1	1	0	0	0	0	0	0	0	0	0
23.7313	22.1068	23.793	26.0869	25.1673	26.6562	25.6634	24.7539	24.9866	26.5949	25.1752	24.7556			+	17	17	17	47.2	47.2	47.2	55.207	0	197.91	468740000	47	12610000	7775700	17998000	64683000	53218000	95808000	63570000	40023000	51867000	8205600	39255000	13728000	2	1	4	6	5	6	5	3	3	1	5	6
19.7423	19.5103	18.6631	19.4044	20.4526	21.1836	20.2231	19.7961	19.3095	18.3423	18.9203	20.3209			+	3	3	3	5.8	5.8	5.8	67.703	0	75.519	10653000	12	1751600	1708100	1558000	1883900	597100	902400	677960	354620	346220	25901	261720	585440	1	1	0	2	2	1	1	0	0	1	1	2
NaN	19.9922	NaN	21.3916	NaN	NaN	18.8641	NaN	NaN	NaN	NaN	NaN			+	2	2	2	7.7	7.7	7.7	45.102	0	47.264	4628200	2	0	227680	0	3950900	0	0	449620	0	0	0	0	0	0	0	0	1	0	0	1	0	0	0	0	0
22.0937	21.659	21.8328	21.0874	21.1023	20.8198	21.6226	21.6618	20.5335	26.307	23.8175	23.5991			+	5	5	1	17.4	17.4	3.8	46.543	0	129.87	91258000	12	8778200	8230500	13427000	1358300	2913800	1233600	6616700	1762400	7150200	11071000	7383900	21332000	1	2	1	1	0	0	0	0	0	3	2	2
NaN	NaN	NaN	19.9795	NaN	NaN	NaN	NaN	NaN	19.4117	NaN	NaN			+	4	4	3	10.6	10.6	8.8	59.299	0	62.069	1399300	3	0	83114	0	1163700	0	0	0	0	0	152550	0	0	0	0	0	3	0	0	0	0	0	0	0	0
22.1099	19.8957	23.272	26.1833	27.9584	27.1536	29.4889	29.0123	28.0099	28.9193	29.7644	27.3822			+	44	44	44	57.6	57.6	57.6	92.273	0	323.31	3186100000	163	4334100	2656200	6321000	143510000	220580000	97666000	948170000	503320000	348040000	80751000	577200000	253590000	0	0	1	9	15	7	31	24	16	8	33	19
19.2188	NaN	19.3935	20.3814	NaN	NaN	NaN	NaN	NaN	NaN	20.1443	NaN			+	2	2	2	10.1	10.1	10.1	22.336	0	38.965	4032800	3	1164000	0	297770	2215000	0	0	0	0	0	0	356070	0	1	0	0	1	0	0	0	0	0	0	1	0
NaN	NaN	NaN	21.7004	20.3523	20.0946	20.5724	19.4027	NaN	20.5703	19.6666	20.8053			+	2	2	2	4.8	4.8	4.8	65.19	0	25.881	10065000	4	0	0	0	3966200	1217300	298200	1752500	214470	0	660370	994910	960800	0	0	0	2	1	1	0	0	0	0	0	0
22.9352	23.0401	23.4463	NaN	21.992	NaN	23.091	21.818	24.6494	NaN	21.6431	22.6161			+	2	1	1	27.5	15	15	8.5787	0	38.178	78871000	3	851880	680020	1136000	0	8791800	0	10659000	4704100	37137000	0	3671400	11240000	0	0	1	0	0	0	1	0	1	0	0	0
15.4589	18.0991	16.8008	24.0728	19.1077	14.5726	16.664	30.5013	23.1034	18.8719	26.0923	21.963			+	30	30	4	58.8	58.8	13.6	53.5	0	323.31	1468500000	61	32271	865700	3177800	39888000	7861600	173450	2056400	1209000000	42882000	2026400	144520000	16037000	0	0	0	6	0	0	0	37	3	0	12	3
NaN	NaN	NaN	NaN	NaN	NaN	NaN	21.0655	NaN	NaN	NaN	NaN			+	16	1	1	41.6	3	3	44.689	0.0093023	6.4336	1928500	1	0	0	0	0	0	0	0	1928500	0	0	0	0	0	0	0	0	0	0	0	1	0	0	0	0
NaN	NaN	NaN	NaN	NaN	NaN	NaN	27.9847	19.5782	NaN	20.5784	NaN			+	10	7	6	21	15.6	14.1	52.247	0	54.713	235400000	8	0	0	0	0	0	0	0	230790000	1207800	0	3405600	0	0	0	0	0	0	0	0	8	0	0	0	0
22.4028	23.8319	24.113	26.1705	26.1944	26.7694	25.8141	26.2815	24.9635	22.7052	24.8469	24.9686			+	12	12	12	16.8	16.8	16.8	70.505	0	227.25	499290000	37	29729000	4650500	8721600	49537000	103720000	63712000	36810000	101750000	34823000	3952100	27238000	34644000	1	2	0	4	5	7	5	5	2	3	2	1
27.4012	27.11	27.7842	29.2169	29.5502	28.1574	30.8823	30.42	30.1322	31.0123	30.7772	30.7551			+	4	4	4	25.1	25.1	25.1	24.409	0	126.46	11555000000	62	172840000	144820000	299800000	782000000	751250000	418610000	1191600000	806600000	1987000000	86385000	2264700000	2649500000	1	2	2	6	4	2	11	3	7	4	8	12
21.6446	21.6748	21.4588	22.4014	21.3343	22.3987	20.4998	22.355	21.1266	22.0638	21.7615	NaN			+	6	6	6	23.3	23.3	23.3	39.234	0	135.15	32649000	15	2651200	4673600	2224100	13406000	980740	1657200	1646600	970070	1959000	1878800	601890	0	3	2	1	4	1	1	0	1	0	1	1	0
21.1096	21.8456	20.7515	24.1814	24.4123	23.8836	25.5138	22.9952	25.0565	24.685	23.5641	25.6465			+	63	10	5	46.4	8.8	3	192.79	0	137.12	224080000	14	1930400	3719800	1627400	38916000	24778000	16956000	39163000	8690500	31425000	4445000	13318000	39112000	0	0	0	4	1	0	2	0	3	2	0	2
21.6645	22.8342	22.6272	21.3981	21.0896	21.6427	21.4978	23.4737	23.6447	23.5777	24.1564	23.7599			+	21	2	0	37.5	6.3	0	68.889	0	70.295	77276000	13	2277400	3281600	6059800	2075600	3000300	752990	3073300	10727000	11267000	4075400	16894000	13792000	0	2	2	0	1	1	0	1	1	1	1	3
24.3181	25.259	24.0816	22.7477	23.6296	23.301	23.9772	24.9306	25.5578	24.6916	26.4769	25.9648			+	16	3	3	29.6	6.1	6.1	68.709	0	108.18	345030000	22	27856000	16695000	27487000	9602400	1495600	5542300	12043000	30590000	61270000	5283500	68679000	78485000	1	1	0	0	1	0	1	3	2	1	7	5
28.8457	28.1036	27.6928	31.2512	28.6054	29.4674	29.8632	28.9371	29.5335	29.3957	28.4179	29.5781			+	9	9	9	90.8	90.8	90.8	15.184	0	266.3	8273000000	186	612010000	228520000	232030000	2408800000	581300000	1229600000	1007800000	307790000	699770000	99372000	286050000	580030000	7	1	1	28	22	28	18	15	24	11	7	24
23.9932	23.8249	23.6177	26.4134	24.0978	24.561	23.9562	NaN	23.7428	22.0953	22.1449	24.4386			+	5	1	1	32.4	8.3	8.3	15.954	0	11.788	232640000	3	20839000	11555000	17561000	78573000	24696000	29793000	13956000	0	16168000	672410	2662700	16162000	0	0	0	1	0	0	1	0	0	0	0	1
24.2864	25.0329	21.3203	19.2034	20.056	18.9485	21.1034	27.1101	22.6231	21.7916	20.8123	22.8171			+	13	10	6	30.5	25.6	16.3	51.621	0	197.35	192090000	18	15756000	23632000	829320	669600	1114800	358510	3237000	126610000	8111100	1257800	5600000	4910200	0	0	0	0	0	0	2	9	2	2	2	1
23.9049	23.5956	24.6408	25.0126	25.5366	25.8917	24.7359	26.0135	24.4191	23.6006	24.3196	24.394			+	7	7	7	11.9	11.9	11.9	67.011	0	90.48	344060000	11	9124000	6162600	18081000	47260000	79062000	86421000	16428000	26717000	18565000	623960	14475000	21136000	0	0	1	1	3	0	2	3	0	0	0	1
22.2179	23.4559	22.1822	25.6655	26.4612	26.4127	24.351	23.1514	25.1679	23.3814	24.8667	24.6024			+	10	10	10	19.9	19.9	19.9	53.339	0	117.24	365930000	29	2044200	3994700	10716000	78261000	76122000	58223000	37136000	10652000	34712000	2857300	23559000	27649000	0	1	2	4	3	3	3	0	5	0	5	3
24.6066	25.1581	26.3477	23.8	25.1374	26.0606	29.5905	28.2954	28.1168	26.7242	28.1071	28.4961			+	35	30	30	62.2	56	56	69.366	0	323.31	2279600000	112	12335000	15944000	26037000	13999000	420330000	19510000	671380000	442830000	267760000	29049000	122060000	238380000	3	0	4	3	5	4	16	18	22	2	12	23
34.7542	34.7506	34.5236	30.9408	30.6516	30.7511	31.1654	30.893	32.4909	32.1387	31.4825	31.5677			+	59	59	54	79.9	79.9	73.6	69.293	0	323.31	99299000000	875	25094000000	24220000000	28682000000	1575500000	1442900000	1334100000	2649000000	1731500000	5636600000	628200000	3169700000	3135100000	134	132	144	48	51	52	44	44	78	36	56	56
NaN	NaN	NaN	22.6599	NaN	22.2681	23.6261	22.3516	23.5711	24.1817	23.9567	24.2678			+	3	3	3	15.7	15.7	15.7	24.241	0	78.129	75009000	7	0	0	0	7628300	0	2316600	16154000	3702200	10231000	5404500	11398000	18173000	0	0	0	1	1	0	0	1	0	0	1	3
18.436	18.3778	17.9938	17.5234	NaN	18.7059	19.3225	18.8499	19.7618	18.6972	NaN	19.4107			+	3	3	3	2.2	2.2	2.2	138.44	0	17.597	2951200	2	52783	1369300	32876	16767	0	60936	188140	82334	110040	298210	0	739820	0	0	0	0	0	0	0	0	1	1	0	0
20.0332	21.9355	22.0965	24.3949	25.0898	22.2851	27.4515	24.864	26.3152	29.0061	27.2397	27.0535			+	24	24	15	44.3	44.3	31.7	66.017	0	323.31	732270000	68	1084600	1048800	3484300	22939000	23599000	2995800	165980000	58122000	67328000	122160000	119960000	143570000	1	2	0	2	4	0	8	3	10	19	10	9
25.6445	26.3714	25.4407	27.1822	27.5243	28.2353	26.9932	25.7879	26.5796	26.6573	26.5284	27.3489			+	29	29	29	35.8	35.8	35.8	91.215	0	323.31	1376100000	99	29856000	29767000	47399000	235830000	331690000	187120000	96113000	20421000	89966000	17896000	108490000	181570000	4	4	3	14	15	6	10	3	12	10	9	9
NaN	NaN	NaN	NaN	NaN	NaN	NaN	21.5895	19.1025	NaN	NaN	NaN			+	8	1	1	16.9	2.7	2.7	51.267	0	26.17	3340900	1	0	0	0	0	0	0	0	2773000	567820	0	0	0	0	0	0	0	0	0	0	1	0	0	0	0
30.8955	31.5722	32.1921	29.1677	27.6719	28.6672	29.7979	28.4905	29.9241	30.411	29.3497	29.6287			+	17	17	17	53.5	53.5	53.5	38.418	0	323.31	15691000000	445	2670300000	1686500000	4464300000	1042100000	339130000	674210000	1033600000	532870000	1507500000	136750000	877380000	726480000	47	54	54	44	26	33	31	21	36	25	35	39
21.683	24.2624	23.4184	24.1905	25.5125	23.8975	27.9227	26.4135	26.4903	25.2864	26.8187	26.6555			+	19	17	16	32	29.7	28.2	59.51	0	314.26	739590000	36	284820	9184400	6517400	31152000	54554000	7785200	160590000	138270000	94264000	13061000	117320000	106610000	0	1	0	3	1	1	7	5	2	3	3	10
NaN	19.9797	19.9784	20.0816	21.3226	19.7355	21.5609	25.7666	23.7492	22.4392	23.9725	22.274			+	11	6	2	16.3	10	3.6	62.378	0	71.359	87089000	8	0	7712.4	591730	116390	1298400	324710	6250000	53772000	8988600	3299100	8498000	3941500	0	0	0	1	1	0	0	3	1	1	1	0
28.435	27.2533	29.2173	31.0194	30.0775	29.5273	30.8348	29.5799	30.1521	31.4885	28.8948	29.5524			+	25	25	25	69.1	69.1	69.1	30.276	0	323.31	12074000000	317	218580000	242050000	419500000	2518000000	1542400000	1404400000	2079900000	840880000	1279200000	305740000	244740000	979200000	14	8	7	45	55	40	36	23	27	20	21	21
24.6094	23.0958	23.4571	23.4262	23.8105	24.2902	22.3645	23.3081	22.7554	25.596	22.2071	24.148			+	8	8	8	33.6	33.6	33.6	38.252	0	61.432	159360000	14	15588000	8687300	22471000	21486000	21289000	35699000	2181900	18640000	1643500	5307700	154930	6207400	1	1	1	0	1	0	1	0	4	4	0	1
NaN	22.3725	22.8523	24.946	21.7787	23.8681	21.6946	19.6792	21.0096	21.5661	20.5562	20.1002			+	7	7	7	15.9	15.9	15.9	51.113	0	186.31	72290000	14	0	271840	607230	31848000	7491300	11135000	11696000	1094100	2848300	1208100	1712800	2376900	1	0	1	5	0	2	2	1	1	0	1	0
NaN	NaN	NaN	NaN	NaN	NaN	NaN	23.5674	18.9298	NaN	18.3322	NaN			+	2	1	1	3	1.5	1.5	63.91	0.0047393	6.5349	11754000	1	0	0	0	0	0	0	0	10444000	965960	0	344010	0	0	0	0	0	0	0	0	1	0	0	0	0
26.1554	26.0419	25.1781	23.6782	23.9514	23.2847	24.0719	23.6313	23.2771	22.0203	23.34	23.9127			+	11	11	11	34.1	34.1	34.1	54.71	0	181.12	268640000	18	50619000	37529000	65717000	14783000	9292600	12440000	10604000	22185000	16172000	1987900	18996000	8317100	5	3	5	2	0	0	1	0	1	0	1	0
31.9959	31.6711	31.7995	28.7422	29.0844	30.5481	28.4514	28.0744	30.2655	28.6473	28.1737	28.8538			+	23	23	23	50.5	50.5	50.5	46.103	0	323.31	15815000000	476	3221800000	2029300000	4182400000	501590000	813580000	2204200000	565780000	273840000	1008700000	123620000	261460000	628750000	71	75	72	42	46	61	13	10	44	8	7	27
NaN	17.3015	NaN	23.2455	25.2059	23.047	25.5989	25.9918	25.3485	28.2217	26.3321	26.3941			+	19	19	18	44.6	44.6	43.5	62.129	0	323.31	293630000	69	0	12112	0	5888300	20590000	3418200	23434000	27078000	31348000	111790000	43515000	26556000	0	1	0	1	6	3	6	6	7	18	11	10
20.1758	22.0244	20.1981	22.7312	23.3199	21.9443	26.1815	25.407	25.5933	23.8829	25.1995	24.8976			+	18	15	11	34.9	30.7	24	65.865	0	167.28	234640000	32	464110	3907200	458600	8995700	11239000	2345600	38884000	46317000	46108000	9360100	36524000	30038000	0	3	0	2	2	0	4	2	5	5	5	4
26.2699	26.3792	25.8098	25.3573	26.7208	25.9325	24.9456	26.4704	25.6755	25.9482	26.2477	25.3425			+	19	19	19	45.2	45.2	45.2	52.347	0	323.31	744710000	63	90284000	66232000	98476000	42977000	139100000	48800000	33085000	53502000	70072000	5051500	50097000	47033000	7	4	5	3	5	7	3	7	7	2	6	7
23.2186	24.1709	24.3859	25.8064	25.2837	26.1444	25.7695	24.6884	25.5049	25.2248	24.9944	25.8147			+	12	12	12	28.6	28.6	28.6	51.723	0	239.04	412330000	37	16475000	5818800	32023000	96437000	29214000	28031000	55559000	9286800	47176000	20211000	21940000	50156000	3	2	2	3	6	2	3	2	4	4	3	3
15.3878	14.6331	NaN	NaN	NaN	NaN	17.985	NaN	15.8667	NaN	16.8341	18.3342			+	1	1	1	19.7	19.7	19.7	6.0282	0	9.7963	777310	2	47674	15012	0	0	0	0	216680	0	79130	0	176430	242390	0	0	0	0	0	0	1	0	0	0	0	1
NaN	NaN	NaN	18.9707	17.8553	17.0165	17.9348	29.5301	23.5412	17.0936	23.3964	18.8412			+	28	13	8	53.6	29.2	19.3	55.802	0	209.34	706550000	17	0	0	0	7212900	962670	92470	1286100	632270000	30204000	165430	30898000	3454500	0	0	0	0	0	0	0	15	1	0	1	0
22.2155	23.1498	23.174	26.0523	25.574	23.1808	21.5717	23.3266	22.4379	20.0776	20.5297	22.1807			+	5	5	5	50	50	50	11.202	0	166.4	185760000	31	5884500	2965500	8486700	82682000	40510000	3209000	22277000	8368900	7803500	103490	1775300	1691400	2	2	4	6	4	1	3	5	1	0	2	1
20.8408	20.4839	20.7375	25.0805	25.2798	24.8695	26.4519	27.1076	24.4912	25.3922	27.4275	26.1798			+	8	8	8	31.3	31.3	31.3	35.979	0	286.04	588150000	31	6822600	2705200	3849700	35182000	44167000	41999000	87797000	113370000	38304000	7653800	144900000	61393000	0	0	0	5	2	3	3	3	2	4	5	4
18.9357	18.9902	18.5981	21.401	18.8305	21.1823	NaN	NaN	NaN	NaN	NaN	18.9396			+	3	3	3	10.5	10.5	10.5	38.756	0	17.284	7101900	2	30616	734240	844020	3043200	26006	1979800	0	0	0	0	0	443990	0	0	0	1	0	1	0	0	0	0	0	0
30.5358	31.4294	30.8265	23.0401	20.3119	21.736	22.9604	16.932	27.1226	27.0879	21.3801	23.0843			+	41	41	38	67.9	67.9	64.4	75.829	0	323.31	6028000000	145	894690000	2169900000	2720300000	43439000	4559800	6281000	15741000	883980	142810000	10093000	5032400	14291000	42	32	36	4	3	2	3	0	14	3	3	3
24.507	24.8231	24.8425	26.6854	24.3921	26.58	25.7058	23.2939	24.9122	25.4743	23.1587	24.9128			+	17	17	17	22.2	22.2	22.2	99.55	0	224.33	447670000	37	17998000	17167000	25506000	92683000	16072000	124200000	61823000	10503000	43648000	6062800	5588700	26422000	4	3	5	5	3	3	4	1	3	2	1	3
23.6891	24.9453	24.7651	26.1788	24.8077	23.9842	24.2685	24.2307	24.367	24.8556	23.3901	23.3998			+	12	12	12	16.9	16.9	16.9	101.24	0	195.58	280590000	19	19293000	14198000	16124000	42326000	15603000	56024000	63971000	13150000	25299000	4016600	8075700	2507400	0	1	0	5	4	2	3	0	0	0	2	2
22.2722	23.0127	23.9283	25.6048	23.4028	24.7685	NaN	30.4915	25.6709	23.4807	26.6664	26.0054			+	24	24	6	67.1	67.1	17.1	46.213	0	323.31	1641000000	45	748830	2415700	3978400	51160000	24070000	5972900	0	1334000000	46465000	5733300	119780000	46640000	0	1	0	2	0	0	0	34	2	0	4	2
NaN	NaN	NaN	NaN	NaN	NaN	NaN	23.011	NaN	NaN	NaN	NaN			+	27	2	1	45	4.6	1.8	54.971	0	39.877	7588600	1	0	0	0	0	0	0	0	7427800	0	0	160860	0	0	0	0	0	0	0	0	1	0	0	0	0
NaN	NaN	NaN	19.33	NaN	NaN	19.2613	27.6349	21.074	20.8178	21.6909	NaN			+	22	8	2	62.5	23.8	5.5	47.237	0	250.81	188330000	14	0	0	0	1462000	0	0	1231600	170220000	6612200	1107400	7696500	0	0	0	0	1	0	0	0	10	1	0	2	0
24.1729	23.9032	22.1781	25.7348	25.9544	25.5043	25.4994	23.7463	23.3166	25.0167	23.1789	24.1427			+	21	21	21	17.9	17.9	17.9	188.74	0	323.31	323130000	35	5615000	5271400	2807100	87217000	83145000	51327000	28752000	12754000	12765000	1843500	12857000	18778000	0	1	1	7	6	2	8	2	2	1	1	4
NaN	NaN	NaN	NaN	NaN	NaN	NaN	NaN	22.5852	NaN	NaN	22.8186			+	2	2	2	4	4	4	65.056	0	16.534	57164000	3	2079200	1683000	5798900	5201100	2828900	3382200	11008000	4313400	6122100	265480	7502400	6979300	0	1	0	0	0	0	1	0	0	0	0	1
22.9253	23.2451	22.797	23.8414	24.5404	24.1157	24.3295	24.6126	23.2244	23.3176	25.839	25.8081			+	3	3	3	19.2	19.2	19.2	24.536	0	125.67	237530000	13	8333400	5901500	10675000	18836000	20862000	13265000	20521000	26750000	9051900	2857700	50362000	50119000	2	0	1	1	1	1	1	2	2	2	0	0
NaN	NaN	21.7038	21.0367	NaN	NaN	20.9193	NaN	20.7558	21.3265	20.9206	21.0156			+	3	3	3	4.9	4.9	4.9	68.886	0	20.789	14423000	8	0	0	3811300	2349700	0	0	2502300	0	1733300	558180	1584500	1884000	0	0	1	1	0	1	1	0	1	1	1	1
24.6327	24.9502	24.3609	27.6092	28.0164	26.6165	28.3674	27.7096	28.3176	28.6505	28.7177	28.2676			+	34	34	34	35.8	35.8	35.8	140.37	0	323.31	2234400000	120	10899000	21673000	25195000	251700000	187910000	80810000	334070000	179510000	343570000	112280000	365020000	321800000	1	0	0	10	12	3	16	16	16	11	16	19
21.7045	20.5166	20.7787	24.8267	25.7893	23.8987	24.3113	26.0978	24.7168	22.1384	26.0777	25.2149			+	16	16	16	8.3	8.3	8.3	248.98	0	165.4	317350000	31	6061700	1033400	3410100	27212000	85332000	26028000	19113000	50982000	16371000	677440	49614000	31511000	0	1	1	4	3	2	1	10	3	0	4	2
22.1674	22.8592	21.8981	25.9585	26.9858	26.2935	25.9741	27.332	25.5789	27.8799	27.6751	26.7351			+	22	22	2	20.7	20.7	2.2	129.39	0	323.31	933230000	62	3320800	2617300	3550800	73539000	111280000	75994000	102300000	171610000	47633000	39952000	143150000	158300000	0	2	0	4	4	4	4	11	7	3	12	11
21.6916	21.2496	23.314	25.3774	25.8354	24.8065	24.194	23.2073	23.1765	24.9452	25.8966	24.8115			+	17	17	17	24.8	24.8	24.8	93.089	0	215.27	284120000	37	1920000	2385900	6135600	59044000	78595000	24772000	16582000	12408000	12756000	4083000	37518000	27917000	0	1	0	7	8	5	2	1	3	2	5	3
NaN	20.6892	NaN	NaN	NaN	NaN	NaN	NaN	NaN	NaN	NaN	NaN			+	4	2	1	5.5	3.1	1.9	69.182	0	9.2278	1166900	1	0	1166900	0	0	0	0	0	0	0	0	0	0	0	1	0	0	0	0	0	0	0	0	0	0
22.825	NaN	20.1899	24.2584	NaN	22.6296	22.6865	NaN	22.3113	21.2616	NaN	20.9258			+	5	5	5	15.6	15.6	15.6	38.348	0	50.844	51132000	11	7763000	0	943160	21314000	0	3744700	8592900	0	5035700	601850	0	3136400	0	0	0	5	1	2	1	0	2	0	0	0
NaN	21.2136	NaN	22.0481	22.781	23.3889	22.3165	NaN	22.0268	NaN	23.0249	NaN			+	3	3	3	8.7	8.7	8.7	48.821	0	17.689	38265000	2	0	539920	0	4011000	6779700	12703000	3763800	25456	2469100	0	7973000	0	0	0	0	2	0	0	0	0	0	0	0	0
18.553	20.0776	NaN	22.0052	24.208	23.8369	22.6905	23.2708	21.6848	20.6805	21.6294	21.8089			+	3	3	3	12	12	12	29.091	0	35.533	65118000	4	111920	258030	0	6089800	18423000	7756500	14591000	7780900	3500700	188620	2643800	3774300	0	0	0	0	2	1	0	1	0	0	0	0
23.8328	23.5922	24.7998	26.2875	26.504	27.2061	28.0477	27.589	27.9224	29.4207	28.0638	27.611			+	8	8	8	49	49	49	22.144	0	287.93	1920500000	42	9606100	5423700	7686800	87958000	162700000	119970000	359800000	243820000	261670000	79372000	218390000	364130000	0	2	1	2	2	2	6	4	5	6	8	4
26.2933	26.4442	26.8971	25.0068	27.4344	26.4786	27.1959	28.5064	28.0579	26.9122	29.6794	29.6781			+	22	22	3	38.2	38.2	6.9	68.964	0	323.31	2837800000	104	82345000	136930000	199630000	47040000	239870000	103770000	94688000	386550000	364430000	34151000	837180000	311180000	2	5	7	3	8	5	7	16	13	7	22	9
NaN	NaN	NaN	NaN	NaN	NaN	NaN	NaN	19.3576	NaN	19.3814	20.5279			+	4	4	4	6	6	6	86.858	0	42.307	2760200	3	0	0	0	0	0	0	0	137770	712020	0	604340	1306000	0	0	0	1	0	0	0	0	0	0	0	2
24.1159	24.806	23.3551	22.8937	21.5603	22.4835	22.2835	NaN	21.9788	23.5117	21.5304	22.173			+	9	9	9	24.1	24.1	24.1	53.553	0	108.43	93370000	18	27677000	16674000	26187000	9427500	646950	4032900	2182400	0	4104900	1836100	98241	502640	3	3	2	1	0	1	3	0	3	2	0	0
NaN	NaN	18.8868	23.321	21.3674	23.6273	22.16	22.652	21.0207	NaN	23.3661	22.9984			+	5	5	5	10.3	10.3	10.3	75.166	0	39.251	56810000	9	0	0	448750	14816000	12011000	11187000	6000200	6612400	2439500	178570	2105800	1010100	0	0	0	1	2	2	1	1	1	0	1	0
21.7529	21.884	22.0716	26.142	26.7488	26.8383	25.918	23.3554	25.2555	23.1207	24.9042	26.0821			+	12	12	11	19.9	19.9	19.7	68.932	0	216.05	518380000	46	4387700	1546400	4458000	115920000	137860000	95397000	54781000	23734000	27473000	1459200	15977000	35390000	1	1	3	8	7	6	6	1	4	1	4	4
21.0037	21.2955	21.3312	23.388	23.8485	23.7851	22.5797	23.3012	22.7968	20.8334	22.5158	23.046			+	6	6	6	17.9	17.9	17.9	43.017	0	56.02	85019000	8	724380	190610	1446900	15176000	19271000	7698200	12538000	1952900	11663000	445310	1520200	12393000	0	0	0	1	2	0	1	0	1	1	1	1
26.399	25.6295	26.2566	28.8392	28.402	28.3579	27.9577	27.3532	27.5741	28.3138	28.3925	27.9753			+	28	28	28	34.1	34.1	34.1	85.411	0	323.31	2725000000	108	39427000	24046000	32470000	776850000	234530000	559090000	214380000	124150000	262380000	34208000	176000000	247430000	4	4	3	18	16	12	11	4	6	9	12	9
NaN	NaN	21.0031	22.2859	NaN	22.2595	21.1674	NaN	20.8694	NaN	NaN	21.6474			+	2	2	2	3.5	3.5	3.5	57.407	0	11.894	20062000	2	0	0	1608500	9322000	0	2996900	1832000	0	1172400	0	0	3129900	0	0	0	0	0	1	1	0	0	0	0	0
24.2969	24.7866	NaN	24.5956	24.9656	23.9482	23.7286	23.7493	23.8476	23.6372	22.6554	23.3934			+	5	5	5	10	10	10	61.998	0	37.969	183290000	10	2062700	2806600	0	31435000	48218000	31513000	19887000	11481000	15645000	1221300	6586400	12436000	0	0	0	3	2	0	1	2	1	0	1	0
28.4497	28.745	28.9497	25.604	24.4478	25.4149	24.2376	23.3265	26.3466	22.7979	23.7837	24.7988			+	15	15	2	40.9	40.9	3.8	53.341	0	273.03	1512700000	44	397110000	356120000	521530000	44663000	7365500	32364000	31808000	4745500	73609000	2503600	4860500	36006000	7	9	12	3	1	1	1	0	6	3	1	0
23.8331	24.5699	24.9815	28.403	29.5335	28.9077	29.7634	30.1278	29.6468	30.7002	31.1303	30.68			+	31	31	2	43.7	43.7	2.3	85.686	0	323.31	9136900000	178	18045000	12456000	19318000	625750000	1442900000	848600000	852290000	1319800000	745850000	154650000	1313100000	1784100000	1	2	1	16	21	14	20	25	15	10	29	24
29.3651	29.4319	28.6982	27.7155	25.6819	28.6021	26.7266	23.062	26.8341	27.6713	24.1357	26.0382			+	24	24	24	47.5	47.5	47.5	68.587	0	323.31	2833700000	82	645150000	517540000	557870000	403350000	64846000	335260000	81973000	4786700	134260000	9187100	8070500	71360000	18	16	14	11	2	3	7	0	5	4	1	1
24.7173	23.8363	26.5603	NaN	NaN	NaN	NaN	NaN	21.3052	NaN	NaN	NaN			+	7	7	7	34.7	34.7	34.7	23.182	0	53.961	148070000	12	24308000	20889000	102300000	0	0	0	0	0	568010	0	0	0	0	4	8	0	0	0	0	0	0	0	0	0
27.1882	27.0845	28.2597	24.8258	24.7148	25.8827	24.0393	23.1092	25.0982	21.63	23.52	23.7524			+	9	9	9	22.2	22.2	22.2	52.209	0	68.519	763700000	16	144000000	141470000	190620000	48965000	39522000	85944000	19023000	10528000	43157000	570560	11796000	28111000	3	5	2	1	1	1	1	0	0	1	0	1
26.5246	26.22	26.6724	27.5011	27.8708	28.2862	26.5866	25.3845	26.5203	26.4439	26.1408	26.5841			+	26	26	26	36.1	36.1	36.1	101.51	0	323.31	1407500000	102	46132000	36464000	70090000	183670000	171130000	280360000	181950000	55271000	105040000	13398000	99120000	164850000	8	4	9	15	12	12	7	5	7	4	10	9
22.4541	24.03	23.9379	21.5354	NaN	23.3853	21.2219	NaN	22.2277	20.7216	22.384	21.1507			+	3	3	3	14.2	14.2	14.2	26.133	0	83.241	69233000	7	3728000	4038500	22704000	12295000	0	8252200	3746900	0	8212400	103050	2133500	4019900	1	2	1	1	0	0	0	0	1	0	0	1
22.8289	22.4931	23.2045	24.5529	25.3832	22.4884	23.5916	24.8923	23.8417	24.7052	24.6184	23.7049			+	8	8	8	21.1	21.1	21.1	54.099	0	149.05	204160000	42	3180800	2148900	6631800	37806000	70677000	12167000	10193000	18935000	8729600	3480700	22169000	8039800	1	2	2	5	11	5	2	5	3	0	4	2
29.4829	29.5315	29.2875	27.8748	24.6836	28.5935	25.3035	23.438	25.9201	23.6309	22.6196	21.7914			+	11	11	11	42.9	42.9	42.9	42.663	0	239.49	2775700000	41	674800000	559240000	742230000	224460000	68810000	297500000	80887000	31046000	71390000	3098900	17544000	4734900	8	7	11	3	1	6	2	0	2	1	0	0
NaN	NaN	NaN	NaN	NaN	NaN	NaN	15.4664	NaN	NaN	NaN	NaN			+	24	1	1	41.2	3.7	3.7	54.195	0	7.0754	39786	1	0	0	0	0	0	0	0	39786	0	0	0	0	0	0	0	0	0	0	0	1	0	0	0	0
NaN	NaN	19.6968	NaN	NaN	NaN	NaN	NaN	NaN	NaN	NaN	NaN			+	2	2	2	8.5	8.5	8.5	43.315	0	21.478	977090	2	0	0	977090	0	0	0	0	0	0	0	0	0	0	0	2	0	0	0	0	0	0	0	0	0
NaN	NaN	NaN	NaN	NaN	NaN	NaN	NaN	NaN	21.1481	19.9167	19.2028			+	2	2	2	3.4	3.4	3.4	282.39	0	11.514	2849300	3	0	0	0	0	0	0	0	0	0	171490	1689900	987900	0	0	0	0	0	0	0	0	0	1	1	1
NaN	NaN	NaN	NaN	15.2096	NaN	NaN	24.0722	NaN	NaN	20.2343	NaN			+	16	3	0	37.6	7.1	0	49.411	0	19.261	16286000	6	0	0	0	0	13407	0	0	11409000	0	0	4863500	0	0	0	0	0	0	0	0	3	1	0	2	0
23.8718	24.4676	23.9371	26.7897	27.5533	25.0743	25.3583	27.2337	25.4238	27.6399	27.9738	26.185			+	18	18	18	58.4	58.4	58.4	46.228	0	323.31	1026000000	120	33678000	11623000	15170000	161520000	200990000	92043000	44083000	142860000	45612000	27290000	186060000	65018000	2	3	4	10	25	11	5	17	7	6	21	9
21.0712	21.3047	21.3057	22.1904	NaN	21.4998	21.0449	NaN	21.1486	20.6367	NaN	20.9776			+	4	4	4	12.9	12.9	12.9	52.129	0	26.668	22412000	3	1371400	1308500	2182800	8667500	0	2164800	2773100	0	1540100	263760	0	2139700	0	0	0	1	0	1	0	0	0	0	0	1
NaN	NaN	NaN	13.7227	NaN	NaN	NaN	24.9462	19.4131	NaN	20.0646	15.7004			+	9	9	6	66.8	66.8	42.9	21.825	0	100.31	30103000	15	0	0	0	17411	0	0	0	28408000	812810	0	774570	90590	0	0	0	1	0	0	0	8	3	0	3	0
NaN	NaN	NaN	NaN	NaN	NaN	NaN	23.6301	NaN	NaN	NaN	NaN			+	2	2	2	16.4	16.4	16.4	15.241	0	17.236	11409000	2	0	0	0	0	0	0	0	11409000	0	0	0	0	0	0	0	0	0	0	0	2	0	0	0	0
NaN	NaN	NaN	NaN	NaN	NaN	NaN	25.7251	19.49	NaN	NaN	NaN			+	6	3	3	32.4	16.2	16.2	22.406	0	26.207	49465000	4	0	0	0	0	0	0	0	48859000	605940	0	0	0	0	0	0	0	0	0	0	3	1	0	0	0
NaN	NaN	NaN	19.0506	NaN	NaN	NaN	26.2908	19.9252	NaN	22.8518	20.5995			+	6	6	6	50	50	50	13.48	0	84.343	81406000	6	0	0	0	308930	0	0	0	77324000	95395	0	3341800	336230	0	0	0	0	0	0	0	4	0	0	2	0
22.1886	22.2896	22.2102	24.7955	25.9817	24.2528	24.0972	24.1983	23.8693	26.2552	25.3735	25.0098			+	14	14	14	48	48	48	45.296	0	285.64	243790000	43	423790	995510	4865800	27018000	43385000	8743900	18621000	17011000	24694000	23524000	33477000	41031000	1	0	0	4	8	1	5	3	5	2	7	7
NaN	NaN	NaN	NaN	NaN	17.6073	NaN	27.8359	21.6298	NaN	20.6511	NaN			+	19	18	18	32.2	31	31	64.895	0	323.31	217880000	22	0	0	0	0	0	58169	0	209440000	4691000	0	3688500	0	0	0	0	0	0	0	0	19	2	0	1	0
28.1298	28.0202	27.5721	28.2966	27.8254	28.4827	26.841	24.3196	26.2911	25.8907	24.639	25.9691			+	22	22	22	26.5	26.5	26.5	106.19	0	323.31	1986700000	89	179390000	145720000	217600000	356110000	316100000	235840000	219020000	49372000	134810000	6311900	34987000	91453000	8	6	4	16	16	14	6	1	7	4	2	5
22.2318	19.2934	21.4067	23.5938	NaN	22.4498	20.3086	NaN	20.6794	21.1667	NaN	21.2958			+	5	5	5	17.5	17.5	17.5	46.017	0	44.98	34221000	12	5681300	515940	1723400	17421000	0	5883100	1049200	0	913320	226700	0	807370	2	2	1	4	0	0	2	0	1	0	0	0
26.8466	26.29	26.7804	24.0012	24.6794	25.7568	23.8008	24.0178	26.3479	22.1626	22.8217	24.0434			+	11	11	1	29.2	29.2	2.9	46.236	0	251.26	536900000	20	171500000	85893000	143380000	8495600	10699000	18419000	7803600	8035800	66768000	416870	6909800	8574900	5	3	6	0	1	1	0	0	3	0	1	0
24.7341	25.301	25.6838	21.9739	NaN	NaN	NaN	NaN	22.6521	NaN	NaN	21.9618			+	5	5	2	9.4	9.4	4.6	46.897	0	51.996	134340000	11	41054000	25124000	57966000	2138200	0	0	0	0	6244800	0	0	1812900	1	4	4	1	0	0	0	0	1	0	0	0
24.826	24.0182	23.6136	23.1491	21.8911	24.5189	21.0802	NaN	21.5735	NaN	NaN	20.0624			+	10	10	10	22.7	22.7	22.7	69.561	0	123.45	96732000	18	38160000	18097000	16123000	10561000	1802000	6584400	2458400	0	2530900	0	0	416450	9	2	4	1	0	2	0	0	0	0	0	0
NaN	NaN	NaN	NaN	NaN	NaN	NaN	NaN	NaN	NaN	NaN	NaN				1	1	1	2.6	2.6	2.6	56.775	0	8.1494	0	1	0	0	0	0	0	0	0	0	0	0	0	0	0	0	0	0	0	0	0	0	0	0	1	0
26.2185	25.4707	24.4359	21.5946	NaN	23.8198	21.7921	NaN	22.6498	NaN	21.4764	23.4209				6	6	6	61.9	61.9	61.9	15.727	0	90.988	208590000	10	50060000	16942000	50069000	20615000	24771000	20310000	6041400	0	2716900	274860	6052500	10736000	4	3	1	1	0	1	0	0	0	0	0	0
NaN	NaN	NaN	NaN	NaN	NaN	20.1478	NaN	18.2245	20.1383	19.8688	19.7766				2	2	2	11.3	11.3	11.3	16.32	0	10.944	3355200	2	0	0	0	0	0	0	1305900	0	393590	270350	699790	685530	0	0	0	0	0	0	0	1	1	0	0	0
NaN	NaN	NaN	NaN	NaN	NaN	NaN	NaN	NaN	NaN	NaN	NaN				1	1	1	2.5	2.5	2.5	59.915	0	22.73	0	1	0	0	0	0	0	0	0	0	0	0	0	0	0	0	0	0	0	0	0	0	1	0	0	0
NaN	NaN	NaN	20.0511	19.1008	NaN	NaN	NaN	NaN	NaN	NaN	NaN				2	2	2	6.1	6.1	6.1	52.045	0	18.382	1797400	2	0	0	0	1397100	400360	0	0	0	0	0	0	0	0	0	0	2	0	0	0	0	0	0	0	0
NaN	NaN	NaN	21.2468	20.4787	23.1663	22.2949	19.2633	21.1097	20.6118	NaN	21.9276				2	2	2	6.7	6.7	6.7	54.51	0	16.894	25777000	4	0	0	0	9460500	423830	6189200	4303700	123240	2811600	176790	0	2288400	0	0	0	0	0	1	2	0	0	0	0	1
NaN	NaN	19.7918	21.5036	NaN	20.4072	NaN	NaN	NaN	NaN	NaN	NaN				2	2	2	4.4	4.4	4.4	51.297	0	17.858	5553900	4	0	0	902090	3697400	0	954410	0	0	0	0	0	0	0	0	0	2	0	1	0	0	1	0	0	0
25.0768	25.0718	24.5218	27.3329	22.7663	24.8345	25.7512	22.7849	24.8956	26.8003	22.3008	24.7258			+	23	23	23	70.2	70.2	70.2	51.424	0	323.31	466870000	79	25358000	36358000	49569000	163800000	9680900	37271000	52156000	3572200	36208000	22084000	1458900	29355000	2	2	6	18	1	9	11	3	8	6	1	12
NaN	NaN	NaN	NaN	NaN	NaN	19.7823	NaN	NaN	NaN	NaN	NaN				27	1	1	44.8	2.5	2.5	101.55	0	9.0456	940340	1	0	0	0	0	0	0	940340	0	0	0	0	0	0	0	0	0	0	0	1	0	0	0	0	0
22.6922	20.6021	NaN	21.7154	21.052	NaN	21.7049	21.3354	20.932	23.4645	21.3097	23.3079				3	3	3	31.1	31.1	31.1	16.265	0	29.549	44261000	4	18383000	699930	0	5342300	1859400	0	4877900	377540	1957100	411100	2772300	7580700	0	0	0	0	0	0	0	0	1	1	1	1
29.885	29.2686	28.3942	31.9885	29.4278	30.0833	30.7203	27.9889	29.6355	31.2469	28.0834	30.0852			+	14	14	10	90.3	90.3	66.2	15.859	0	323.31	14066000000	266	938840000	669110000	604650000	3992600000	907290000	2096100000	1707100000	299010000	892720000	116120000	186060000	1656200000	13	19	10	51	23	40	25	12	18	17	11	27
20.1084	19.8226	NaN	21.9916	21.8132	22.3913	22.0649	NaN	NaN	19.7175	NaN	20.7155				6	6	6	6.4	6.4	6.4	138.94	0	100.93	22072000	9	281800	276050	0	4244200	4903100	8205700	1973500	471830	1190000	41054	0	485130	0	1	1	1	0	2	1	2	1	0	0	0
NaN	NaN	NaN	21.2234	23.1075	21.1242	21.071	20.2856	19.8439	21.4377	21.55	21.8945				2	2	2	1.4	1.4	1.4	141.83	0	12.595	24456000	2	0	0	0	3338700	1152600	662850	6186700	1866800	1776500	713160	3134100	5624000	0	0	0	1	1	0	0	0	0	0	0	0
NaN	NaN	20.3845	21.054	19.4477	20.3742	20.0074	19.3759	22.7041	NaN	19.2365	19.2951				4	4	4	3.9	3.9	3.9	129.06	0	25.816	15858000	4	0	0	1771300	4899800	2212900	1206100	1867900	127790	2824800	0	98624	849030	0	0	0	0	0	0	1	0	2	0	1	0
NaN	19.0161	NaN	20.0189	NaN	20.9507	20.0716	NaN	19.8427	NaN	NaN	19.9525				1	1	1	3.3	3.3	3.3	33.886	0	7.1919	6054600	1	0	147590	0	966490	0	2481200	963320	0	778820	0	0	717120	0	0	0	0	0	0	0	0	1	0	0	0
NaN	NaN	NaN	20.5604	NaN	19.6064	20.6912	20.7983	21.0869	21.0172	21.541	20.8728				2	2	1	8.9	8.9	5	19.681	0	16.121	12535000	4	0	0	0	1826300	0	563720	1677100	1752200	2134100	527210	2384200	1670300	0	0	0	0	0	0	1	0	1	0	1	1
19.8216	18.9543	21.6342	23.6772	26.08	25.0866	24.762	26.6954	24.9026	24.5921	26.4178	24.9983				23	23	23	13.6	13.6	13.6	272.15	0	323.31	392530000	49	854640	804640	2617500	35427000	125710000	35914000	32710000	54592000	25107000	6497500	45822000	26473000	0	0	0	3	8	2	5	7	3	6	12	3
NaN	NaN	NaN	NaN	NaN	NaN	19.2716	20.397	NaN	19.102	20.2963	NaN				1	1	1	0.9	0.9	0.9	148.31	0	7.716	3051800	2	0	0	0	0	0	0	734240	1168400	0	129110	1020100	0	0	0	0	0	0	0	0	1	0	0	1	0
21.637	NaN	NaN	24.1492	23.3632	23.4555	21.8609	22.7715	21.8697	21.4391	22.933	22.6299				2	2	2	8.1	8.1	8.1	35.868	0	11.685	69533000	6	1046300	0	0	12614000	10712000	15739000	4563200	6603200	4809000	339140	6535200	6572300	0	0	0	1	1	0	0	2	0	1	1	0
NaN	21.9891	21.4515	24.053	24.2569	25.4751	24.067	23.6941	24.215	24.5706	23.3538	24.0041				9	9	9	20	20	20	50.243	0	82.717	181260000	18	0	2451300	2287600	36706000	26010000	31308000	16664000	13998000	16428000	355880	16760000	18287000	1	1	0	2	1	6	3	1	2	0	1	0
13.8725	NaN	NaN	14.7099	15.2555	16.9808	17.6332	NaN	16.1006	NaN	17.6007	17.8668				2	2	2	8.4	8.4	8.4	27.931	0	25.559	856280	5	13254	0	0	30821	43174	73361	151430	0	92160	0	116790	335290	0	0	0	0	0	1	1	0	0	0	1	2
22.5234	21.6117	23.0573	25.4673	25.4127	25.481	27.2718	26.4332	27.1742	26.3661	26.0615	26.3215				11	11	11	44.2	44.2	44.2	34.015	0	143.98	713250000	39	3252400	3715500	6354900	52954000	73256000	40257000	84259000	78164000	113640000	11032000	97315000	149050000	0	0	0	2	2	2	5	7	6	1	6	8
17.1832	NaN	16.6644	NaN	NaN	NaN	17.467	19.0386	NaN	NaN	NaN	NaN				2	2	2	0.9	0.9	0.9	242.48	0	12.237	979590	2	118350	0	283850	0	0	0	278610	298780	0	0	0	0	1	0	0	0	0	0	0	1	0	0	0	0
NaN	NaN	NaN	NaN	NaN	NaN	22.3396	22.789	NaN	20.9512	21.8529	21.839				2	2	2	21.8	21.8	21.8	16.938	0	48.523	17582000	4	0	0	0	0	0	0	5212300	1972400	0	875170	3883100	5639100	0	0	0	0	0	0	0	0	0	2	1	1
NaN	NaN	19.0926	17.801	20.1071	20.3544	19.6273	18.6518	NaN	NaN	18.2552	18.812				2	2	2	4.6	4.6	4.6	41.06	0	12.324	5168400	5	0	0	1253900	140790	1786600	583070	561760	203310	0	0	134980	503960	0	0	0	1	2	1	0	0	0	0	0	1
22.4986	23.8319	23.9599	21.6527	22.2124	NaN	22.0654	NaN	22.368	NaN	22.0425	22.0674				2	2	2	11.5	11.5	11.5	21.068	0	18.616	60475000	2	17161000	12872000	18897000	2687300	1941300	0	1680300	0	2472500	0	1284000	1479500	0	0	1	1	0	0	0	0	0	0	0	0
NaN	NaN	NaN	20.454	NaN	NaN	21.4803	NaN	20.8474	21.5838	20.4926	NaN				1	1	1	16.7	16.7	16.7	10.692	0	93.541	8618600	3	0	0	0	1558300	0	0	3587200	0	1797000	662710	1013400	0	0	0	0	1	0	0	0	0	0	1	0	1
NaN	NaN	NaN	21.6909	22.3715	23.2055	22.943	23.0315	23.2348	20.7439	23.0338	23.6177				3	3	3	10	10	10	31.57	0	19.546	62266000	7	0	0	0	3719700	6439200	4690800	16074000	4212100	11432000	760790	9019800	5918000	0	0	0	1	1	0	1	1	2	1	0	0
NaN	NaN	NaN	19.6248	NaN	20.3144	19.0896	NaN	NaN	NaN	NaN	19.174				1	1	1	7.7	7.7	7.7	17.6	0	9.3026	3071300	2	0	0	0	882880	0	1004600	604390	0	0	0	0	579450	0	0	0	1	0	1	0	0	0	0	0	0
23.7408	23.0988	24.1055	20.2744	22.2355	23.0922	21.2639	22.8642	22.6386	20.0967	22.7834	22.2956				3	3	3	11.3	11.3	11.3	37.994	0	96.854	78264000	14	21016000	17582000	13432000	2307300	2705300	3920500	1540000	3532200	4705100	55429	4746300	2722000	2	1	0	1	2	0	1	1	3	1	2	0
NaN	NaN	NaN	NaN	15.3348	15.5781	16.5363	16.1918	16.2049	NaN	15.4298	16.4699				1	1	1	6.5	6.5	6.5	28.794	0	7.4198	441460	3	0	0	0	0	41197	39403	106010	64968	75491	0	30076	84316	0	0	0	0	1	1	0	0	0	0	0	1
NaN	NaN	NaN	NaN	NaN	NaN	NaN	NaN	17.6743	NaN	NaN	NaN				1	1	1	13.5	13.5	13.5	17.114	0	7.5869	211000	1	0	0	0	0	0	0	0	0	211000	0	0	0	0	0	0	0	0	0	0	0	1	0	0	0
18.0719	19.5971	19.336	22.0376	22.6186	21.2221	24.3645	23.7489	25.0861	20.0028	26.2615	26.3733				7	7	7	23	23	23	44.47	0	134.17	227480000	20	554780	606140	31628	7878800	9180900	4844800	24785000	11185000	42867000	4108800	70864000	50571000	0	0	0	0	1	0	3	1	4	2	5	4
18.0597	18.0319	18.7844	24.3259	26.91	26.2939	26.2247	25.8109	24.2004	23.8506	25.066	25.1524			+	15	15	14	23.7	23.7	22.4	82.362	0	215.41	421520000	70	3979500	31524	6922400	60356000	71484000	76780000	66191000	49483000	18278000	7203300	33852000	26958000	1	1	0	10	13	5	8	6	8	3	7	8
NaN	NaN	NaN	NaN	NaN	NaN	NaN	NaN	NaN	NaN	NaN	18.3801				1	1	1	5.4	5.4	5.4	18.45	0.0091324	6.3415	1156900	0	0	7732.3	0	15743	33832	23878	331660	0	0	30129	401540	312430	0	0	0	0	0	0	0	0	0	0	0	0
NaN	NaN	NaN	NaN	NaN	NaN	NaN	21.3529	NaN	NaN	NaN	NaN				1	1	1	9.1	9.1	9.1	14.678	0	9.231	2353600	2	0	0	0	0	0	0	0	2353600	0	0	0	0	0	0	0	0	0	0	0	2	0	0	0	0
NaN	NaN	NaN	16.2365	NaN	NaN	16.602	16.5118	18.5535	NaN	NaN	16.3602				4	3	3	8.8	7.3	7.3	53.727	0	23.689	6818100	1	0	0	5692700	88857	0	42999	136650	101620	322440	346960	0	85823	0	0	0	0	0	0	0	0	1	0	0	0
NaN	NaN	NaN	NaN	NaN	NaN	21.7867	21.5476	21.2836	19.9031	22.4489	21.9284				1	1	1	2.2	2.2	2.2	45.487	0	6.6495	17623000	3	0	0	0	0	0	0	3947100	2666700	2398400	215240	4727000	3668400	0	0	0	0	0	0	0	0	0	1	1	1
NaN	24.7834	24.5666	22.6531	22.8069	NaN	23.0446	NaN	NaN	NaN	23.1248	NaN				2	2	2	2.6	2.6	2.6	94.602	0	11.734	81919000	3	0	27888000	34398000	2372700	5252100	0	3782500	2639600	183780	0	3334700	2067700	0	0	0	0	1	0	0	1	0	0	0	1
NaN	NaN	NaN	19.3689	20.3654	20.4788	20.4697	20.5649	20.2117	NaN	NaN	NaN				1	1	1	1.3	1.3	1.3	128.93	0.0092593	6.4315	7254100	1	0	0	0	390230	1194400	1282400	1663200	1598900	1125000	0	0	0	0	0	0	0	1	0	0	0	0	0	0	0
NaN	NaN	NaN	18.5354	19.0487	NaN	19.8402	19.7225	19.7838	NaN	19.6988	20.2505				1	1	1	1.3	1.3	1.3	88.093	0.009434	6.4765	5431400	1	0	0	0	212900	378680	0	1203900	861690	1076900	0	780590	916850	0	0	0	0	0	0	0	0	0	0	0	1
NaN	NaN	NaN	20.2808	NaN	NaN	20.6703	NaN	NaN	19.6971	20.521	19.7392				3	3	3	7.3	7.3	7.3	74.407	0	25.633	5813000	5	0	0	0	1604000	0	0	2429400	138500	0	138770	1157300	345060	0	0	0	0	0	0	1	1	0	0	1	2
24.7543	23.9852	25.413	27.8531	25.8914	27.0711	27.9074	24.5585	26.4269	24.905	23.7496	25.7348				13	13	13	42.4	42.4	42.4	41.792	0	177.83	936480000	28	27979000	23133000	43387000	260960000	75932000	215400000	136550000	25015000	59028000	8432300	7900100	52762000	2	1	3	7	2	1	6	1	1	3	1	0
NaN	NaN	NaN	20.4443	NaN	NaN	NaN	NaN	NaN	NaN	NaN	NaN				1	1	1	6.5	6.5	6.5	20.987	0	12.349	1605900	1	0	0	0	1605900	0	0	0	0	0	0	0	0	0	0	0	1	0	0	0	0	0	0	0	0
NaN	NaN	NaN	NaN	NaN	14.5665	NaN	16.6857	NaN	NaN	NaN	NaN				2	2	2	19.4	19.4	19.4	11.367	0	12.965	13616000	1	0	0	13504000	0	0	19267	0	92632	0	0	0	0	0	0	0	0	0	0	0	1	0	0	0	0
NaN	NaN	NaN	NaN	19.4028	NaN	NaN	NaN	20.2572	NaN	NaN	NaN				2	2	2	12.2	12.2	12.2	17.869	0	13.309	1945300	4	0	0	0	0	681190	0	0	0	1264100	0	0	0	0	0	0	2	0	1	0	0	1	0	0	0
NaN	NaN	20.0725	21.5739	NaN	22.7732	20.1092	22.5038	20.3636	NaN	NaN	NaN				3	3	2	14.7	14.7	10.6	27.745	0	100.48	18532000	6	0	0	1357600	3639100	0	5852600	1271200	4882800	1271500	0	0	257240	0	0	0	1	0	1	1	1	1	0	0	1
26.2746	26.388	26.4684	25.7121	26.5662	25.8635	22.5551	25.2759	23.7801	NaN	25.3429	24.5567				5	5	5	13.4	13.4	13.4	50.14	0	31.109	606610000	8	57652000	46570000	86717000	238020000	84888000	25893000	8603000	18966000	6538700	0	20705000	12065000	0	0	0	1	0	0	2	1	1	0	2	1
19.5408	19.0508	NaN	19.1403	20	20.3208	19.4601	NaN	18.2303	NaN	NaN	NaN				1	1	1	1.1	1.1	1.1	92.601	0	6.756	4873600	3	814000	400020	0	530170	1024700	1113600	660100	0	331070	0	0	0	1	1	0	0	0	0	0	0	1	0	0	0
NaN	NaN	NaN	NaN	NaN	NaN	NaN	NaN	NaN	NaN	NaN	17.2017				1	1	1	1.2	1.2	1.2	261.89	0	6.5696	138040	0	0	0	0	0	0	0	0	0	0	0	0	138040	0	0	0	0	0	0	0	0	0	0	0	0
NaN	NaN	NaN	22.6867	20.1549	NaN	NaN	NaN	NaN	NaN	NaN	NaN				1	1	1	3.1	3.1	3.1	49.924	0	7.9361	8746100	1	0	0	0	7598900	1147200	0	0	0	0	0	0	0	0	0	0	1	0	0	0	0	0	0	0	0
NaN	NaN	NaN	NaN	NaN	NaN	NaN	NaN	NaN	NaN	NaN	19.1399				1	1	1	16.3	16.3	16.3	10.281	0.0092166	6.4066	2283600	0	0	0	0	0	0	0	0	0	0	642520	1112000	529030	0	0	0	0	0	0	0	0	0	0	0	0
NaN	NaN	NaN	NaN	NaN	NaN	18.439	18.4835	18.1443	NaN	18.7252	18.4439				2	2	2	0.9	0.9	0.9	312.25	0	12.628	1649500	2	0	0	0	0	0	0	350910	314490	225580	0	447180	311330	0	0	0	0	0	0	0	0	0	0	1	1
NaN	NaN	NaN	23.8156	25.6693	25.6648	25.8802	25.7155	24.8104	26.6168	26.1362	26.4801				9	9	9	19.8	19.8	19.8	67.16	0	105.01	468440000	19	0	0	0	3380800	42125000	37069000	68198000	50322000	52533000	7203300	88681000	118930000	0	0	0	2	1	0	2	3	1	2	5	3
21.5364	NaN	NaN	21.7043	20.7345	NaN	24.5709	24.3733	23.1399	NaN	23.6847	24.3535				2	2	2	3.5	3.5	3.5	112.24	0	12.148	94535000	4	1940200	0	0	2550700	1714900	0	33425000	14379000	10303000	0	11625000	18599000	0	0	0	0	1	0	0	1	1	0	0	1
NaN	NaN	NaN	19.998	21.6685	22.0165	20.2703	21.3657	20.8602	18.3664	21.0587	21.8202				2	2	2	12	12	12	27.89	0	84.735	18800000	10	0	0	0	1457200	3415600	3655700	1607400	1067300	2030100	76290	1878400	3611800	0	0	0	1	1	1	1	1	1	0	2	2
NaN	NaN	NaN	17.2721	17.9965	18.902	20.194	20.041	20.2367	17.5932	20.93	22.4311				3	3	3	13.1	13.1	13.1	24.967	0	33.079	11114000	13	0	0	0	103480	149280	230140	726590	550620	1584300	25123	2219700	5525200	0	0	0	1	2	1	2	1	1	0	1	4
NaN	NaN	NaN	17.7782	17.8567	19.3367	NaN	NaN	NaN	NaN	NaN	NaN				1	1	1	1.4	1.4	1.4	124.95	0	28.111	1008900	4	0	0	0	249360	222380	537120	0	0	0	0	0	0	0	0	0	2	1	1	0	0	0	0	0	0
NaN	NaN	NaN	18.8832	NaN	NaN	NaN	22.1632	NaN	NaN	NaN	NaN				7	1	0	11.8	2	0	59.035	0	8.7252	4671500	1	0	0	0	544240	0	0	0	4127300	0	0	0	0	0	0	0	0	0	0	0	1	0	0	0	0
NaN	NaN	NaN	NaN	NaN	NaN	NaN	20.0434	NaN	NaN	NaN	14.3004				1	1	1	1.4	1.4	1.4	86.527	0.0090909	6.2807	968030	1	0	0	0	0	0	0	0	949550	0	0	0	18478	0	0	0	0	0	0	0	1	0	0	0	0
NaN	NaN	NaN	20.7882	20.0733	20.9142	NaN	NaN	NaN	NaN	NaN	NaN				1	1	1	2.3	2.3	2.3	76.608	0	8.581	4763700	1	0	0	0	1851800	947480	1964500	0	0	0	0	0	0	0	0	0	1	0	0	0	0	0	0	0	0
NaN	NaN	NaN	NaN	NaN	NaN	21.0456	NaN	20.8886	23.6835	21.1265	21.7776				3	3	3	4.8	4.8	4.8	79.972	0	55.337	18269000	4	0	0	0	1411100	1746200	0	3452800	0	1894200	2382300	2281800	5100100	0	0	0	0	0	0	0	0	1	1	0	2
NaN	NaN	16.5667	NaN	NaN	NaN	NaN	NaN	NaN	NaN	NaN	NaN				2	2	2	3.9	3.9	3.9	70.258	0	17.765	111600	2	0	0	111600	0	0	0	0	0	0	0	0	0	0	0	1	0	0	1	0	0	0	0	0	0
NaN	NaN	18.2573	19.0734	21.9679	20.3124	NaN	21.4478	20.3725	19.9919	23.5634	NaN				1	1	1	1.1	1.1	1.1	79.934	0	6.6081	20228000	2	0	0	258010	590060	2859000	1509600	0	5439300	2041400	297990	7232400	0	0	0	0	0	1	0	0	0	0	0	1	0
NaN	NaN	NaN	NaN	18.9949	NaN	18.5673	19.4108	19.8071	20.0538	18.9416	19.173				3	3	3	6.5	6.5	6.5	50.133	0	25.125	3381200	4	0	0	0	0	341360	0	413990	543300	1080200	329770	265380	407170	0	0	0	0	0	0	1	0	1	0	1	1
NaN	NaN	NaN	NaN	NaN	NaN	NaN	NaN	NaN	NaN	NaN	NaN				21	1	1	19.7	1.2	1.2	129.53	0	84.451	0	1	0	0	0	0	0	0	0	0	0	0	0	0	0	0	0	1	0	0	0	0	0	0	0	0
NaN	NaN	NaN	NaN	NaN	NaN	NaN	NaN	NaN	NaN	NaN	NaN				2	2	1	2	2	2	72.082	0	9.3467	0	1	0	0	0	0	0	0	0	0	0	0	0	0	0	0	0	0	0	0	0	0	0	0	0	1
NaN	NaN	NaN	17.7545	19.962	19.7097	19.1807	18.7226	18.9154	NaN	19.3701	19.784				3	3	3	4	4	4	104.54	0	32.177	4619300	4	0	0	0	33257	478680	1719300	768950	181330	99659	0	130400	1207600	0	0	0	0	1	0	2	0	0	0	0	1
NaN	NaN	NaN	17.3106	NaN	NaN	18.4239	18.506	18.1572	NaN	20.3721	18.1669				3	3	3	4.9	4.9	4.9	67.974	0	16.11	2486100	2	0	0	0	26884	0	0	476840	540270	55153	0	1336200	50745	0	0	0	0	0	0	0	0	0	0	2	0
NaN	NaN	NaN	20.3333	21.9281	22.1679	22.4013	22.9908	22.7043	22.7696	21.8962	21.9707				2	2	2	8.9	8.9	8.9	26.399	0	16.146	43741000	2	0	0	0	9957400	147350	3025300	8428000	6648600	4750100	105300	4779700	5899600	0	0	0	1	0	0	1	0	0	0	0	0
22.0931	21.6082	20.2823	25.0945	25.4844	24.87	23.5036	25.4694	24.7239	21.2252	25.4516	25.3022				5	5	5	9.3	9.3	9.3	70.993	0	47.266	276620000	12	7261500	7371100	80559	50688000	66316000	38466000	9786800	22528000	17212000	348990	30285000	26277000	0	0	0	4	1	1	0	2	2	1	0	1
NaN	NaN	NaN	NaN	NaN	NaN	NaN	NaN	NaN	NaN	NaN	NaN				2	1	1	5	2.7	2.7	49.67	0	9.76	0	1	0	0	0	0	0	0	0	0	0	0	0	0	0	0	0	0	0	1	0	0	0	0	0	0
19.6765	NaN	NaN	NaN	20.0269	21.5125	19.9735	20.3209	NaN	NaN	20.6198	NaN				3	3	3	16.4	16.4	16.4	40.463	0	22.19	7518600	5	329730	0	0	0	526640	2996900	519040	1462300	0	0	1684100	0	0	0	0	1	0	2	0	0	0	0	1	1
NaN	NaN	NaN	NaN	NaN	18.2923	18.8856	20.0913	19.0904	NaN	19.0856	19.0408				1	1	1	3	3	3	44.859	0.0093897	6.4594	3280900	2	0	0	0	0	0	221450	539000	899700	645050	0	419490	556210	0	0	0	0	0	0	0	1	0	0	1	0
29.3656	29.7114	29.4293	31.874	31.5045	31.3479	29.8776	28.7751	29.7632	30.3482	29.0264	29.891			+	81	81	81	57.1	57.1	57.1	187.25	0	323.31	16206000000	373	395220000	251790000	458600000	3948600000	3953600000	3507400000	869700000	565050000	992690000	84381000	344440000	834540000	11	18	18	72	69	55	26	14	27	17	18	28
21.5471	NaN	NaN	25.3879	23.6883	23.6044	26.054	24.3586	25.5016	26.5531	24.3847	25.4942				4	4	4	27.5	27.5	27.5	21.401	0	103.97	319040000	24	383750	0	0	54576000	7489000	15394000	107630000	18448000	49812000	16343000	18905000	30059000	1	0	0	2	3	0	2	4	3	2	3	4
NaN	NaN	NaN	20.8601	20.4178	22.7891	NaN	NaN	19.821	NaN	NaN	20.0878				1	1	1	1.4	1.4	1.4	75.782	0	6.7126	11720000	1	0	0	0	3680800	1740700	4491000	0	0	781110	0	0	1026600	0	0	0	0	0	1	0	0	0	0	0	0
NaN	NaN	NaN	17.4	17.7014	19.596	18.1163	NaN	18.345	16.7146	NaN	18.3815				1	1	1	5	5	5	29.677	0	7.4735	2082700	1	0	0	0	144560	191690	435300	361560	0	480190	10864	0	458530	0	0	0	0	0	1	0	0	0	0	0	0
NaN	NaN	NaN	NaN	NaN	NaN	NaN	NaN	NaN	NaN	NaN	17.6545				2	2	2	6.9	6.9	6.9	47.637	0	11.726	188930	2	0	0	0	0	0	0	0	0	0	0	0	188930	0	0	0	0	1	0	0	0	0	0	0	1
NaN	NaN	NaN	NaN	NaN	NaN	20.2926	NaN	NaN	NaN	20.6458	20.4433				2	1	1	2.6	1.6	1.6	105.97	0	69.87	3994800	3	0	0	0	0	0	0	1339400	0	0	0	1349600	1305800	0	0	0	0	0	0	0	1	0	0	1	1
NaN	NaN	NaN	21.5937	22.2267	23.286	21.5362	NaN	20.2151	NaN	22.7584	21.0856				3	3	3	9.1	9.1	9.1	51.272	0	58.887	27946000	7	0	0	0	3719100	4531500	12719000	1424800	0	283880	0	4422500	844820	0	0	0	1	1	3	1	0	0	0	1	0
NaN	NaN	NaN	NaN	NaN	NaN	NaN	NaN	NaN	NaN	20.2314	NaN				1	1	1	1.6	1.6	1.6	82.905	0	9.3048	1012700	1	0	0	0	0	0	0	0	0	0	0	1012700	0	0	0	0	0	0	0	0	0	0	0	1	0
NaN	NaN	NaN	19.9737	NaN	20.3135	17.9094	NaN	NaN	NaN	NaN	NaN				2	1	1	9.8	5.7	5.7	27.764	0	56.614	2450400	2	0	0	0	1158900	0	1034700	256740	0	0	0	0	0	0	0	0	1	0	1	0	0	0	0	0	0
NaN	NaN	NaN	18.2642	15.8339	18.8849	18.2238	16.3438	17.3926	NaN	16.0804	18.169				2	2	2	11.6	11.6	11.6	35.706	0	13.123	1661900	5	0	0	0	315190	51060	493900	283980	60462	172200	0	45053	240080	0	0	0	2	1	0	1	0	0	0	0	1
20.2516	19.7558	20.3688	NaN	19.7728	NaN	20.5064	21.4545	20.339	22.3289	22.5277	21.7887				4	4	4	15.1	15.1	15.1	27.878	0	27.814	19553000	5	51454	17861	69591	1920000	1877500	0	2221900	2791900	2887600	1763100	1880200	4072400	0	0	0	0	0	0	1	0	1	0	2	1
NaN	NaN	NaN	NaN	NaN	NaN	NaN	NaN	NaN	NaN	NaN	18.0392				2	2	2	4.1	4.1	4.1	35.686	0	10.757	1051800	1	0	0	0	283680	107450	108410	138380	0	0	0	167200	246680	0	0	0	0	0	0	0	0	0	0	1	0
NaN	NaN	NaN	16.7619	16.0677	18.4137	17.614	17.6517	16.7936	NaN	16.0961	17.6933				1	1	1	7	7	7	22.426	0	11.87	1226300	7	0	0	0	125080	67504	277290	209210	180940	114590	0	57627	194090	0	0	0	1	1	0	1	1	1	0	1	1
NaN	NaN	NaN	16.2335	17.0272	17.6143	17.5357	18.3127	17.4242	NaN	NaN	NaN				2	2	2	5.3	5.3	5.3	62.481	0	11.519	1020700	2	0	0	0	32365	84930	118620	182380	451230	151150	0	0	0	0	0	0	0	0	1	1	0	0	0	0	0
NaN	NaN	NaN	23.0464	24.7851	22.4027	25.6583	24.6737	NaN	NaN	NaN	23.6942				1	1	1	2.5	2.5	2.5	40.786	0	6.8897	136820000	4	0	0	0	7245000	22351000	2819500	75030000	18501000	0	0	1090100	9778200	0	0	0	0	1	0	0	1	0	0	1	1
18.7798	NaN	NaN	20.8818	NaN	21.6638	20.8408	NaN	20.684	19.2442	NaN	22.2026				1	1	1	4.8	4.8	4.8	26.689	0	28.876	13420000	1	113240	0	0	2349200	0	4900400	2056100	0	1600300	47150	0	2353500	0	0	0	0	0	0	0	0	0	0	0	1
21.4715	21.5291	NaN	22.5478	21.8087	22.1323	21.4255	22.4676	21.5601	19.8629	NaN	21.2836				3	3	3	9.3	9.3	9.3	36.723	0	31.717	32184000	4	2485200	1954900	0	6696900	2920200	9089700	1427100	5099500	1663600	34307	0	812780	0	0	0	2	2	0	0	0	0	0	0	0
NaN	NaN	NaN	21.1741	21.1974	NaN	21.137	20.9839	20.9163	20.9862	21.7156	21.0402				2	2	2	8.6	8.6	8.6	25.802	0	14.081	17065000	3	0	0	0	3323300	1729200	0	2139000	1881900	2342000	309010	2719100	2621500	0	0	0	0	0	0	1	1	0	0	1	0
NaN	NaN	NaN	NaN	19.8817	20.5641	20.041	19.6061	NaN	18.6141	18.9987	20.23				1	1	1	8.4	8.4	8.4	18.518	0	8.0593	5749600	1	0	0	0	0	929960	1935300	1230700	567480	0	35712	228900	821620	0	0	0	0	0	0	0	0	0	0	0	1
NaN	18.9436	19.6185	21.774	23.5055	23.0066	25.0725	25.2678	24.1972	19.7879	23.3744	22.5421				8	8	8	17.2	17.2	17.2	62.44	0	186.86	127980000	19	0	191080	526930	5451100	18243000	24656000	26176000	29310000	14089000	300500	6748000	2292300	0	0	0	1	1	2	4	4	2	0	4	1
NaN	NaN	NaN	15.7953	NaN	16.8748	16.0317	NaN	16.3277	NaN	NaN	16.4028				2	2	2	4.3	4.3	4.3	47.231	0	11.737	381400	2	0	0	0	39724	0	125160	67021	0	74475	0	0	75024	0	0	0	0	0	0	1	1	0	0	0	0
17.1846	17.2188	17.3465	19.5693	19.4682	21.2005	21.2463	NaN	19.5233	NaN	18.7524	NaN				2	2	2	4.2	4.2	4.2	69.871	0	41.496	7699600	5	19762	14079	26391	2541600	2288500	2319000	247970	0	173110	0	69240	0	0	0	0	2	0	2	1	0	0	0	0	0
NaN	19.2551	NaN	18.9405	NaN	19.7992	NaN	NaN	NaN	NaN	NaN	19.426				1	1	1	1.4	1.4	1.4	87.466	0	6.7162	2377700	1	0	349770	0	584140	0	855570	0	0	0	0	0	588170	0	0	0	1	0	0	0	0	0	0	0	0
NaN	NaN	20.7499	21.563	NaN	NaN	NaN	NaN	NaN	NaN	NaN	20.344				1	1	1	1.5	1.5	1.5	84.73	0	15.062	6769900	1	0	0	2413500	3261200	0	0	0	0	0	0	0	1095100	0	0	0	1	0	0	0	0	0	0	0	0
30.3601	30.1706	30.4401	28.8141	28.2122	28.7237	27.6272	28.0305	28.1939	28.7622	28.477	27.6754			+	58	58	58	53.8	53.8	53.8	167.57	0	323.31	6588300000	205	1423500000	1171400000	1438000000	522550000	469400000	515230000	119390000	266100000	256500000	28634000	222790000	154790000	26	24	36	20	15	7	12	12	17	7	16	13
NaN	NaN	13.58	NaN	13.5285	NaN	14.5435	21.5318	15.8533	NaN	15.5432	15.1199				3	3	3	5.2	5.2	5.2	81.82	0	38.429	2847800	4	0	0	20460	0	9365.1	0	28550	2569900	79658	0	94284	45648	0	0	0	0	0	0	0	3	1	0	0	0
NaN	NaN	20.1587	21.9736	20.8959	21.398	22.4743	22.3079	21.6944	24.3909	24.1783	24.8421				5	5	5	35.3	35.3	35.3	21.063	0	220.45	67750000	9	0	0	328780	4310500	604790	823640	7804800	1281200	5488000	6401100	13018000	27689000	0	0	0	0	0	0	2	0	0	0	3	4
NaN	NaN	NaN	19.8733	NaN	18.5916	NaN	NaN	NaN	NaN	NaN	NaN				1	1	1	4.3	4.3	4.3	39.666	0	7.6846	1394700	1	0	0	0	1081000	0	313680	0	0	0	0	0	0	0	0	0	1	0	0	0	0	0	0	0	0
[truncated: 4 more columns]

## Sheet: table4
Table 4. Proteins identified after valid value filter (1vv in total)
DMEM_1	DMEM_2	DMEM_3	NUAD_1	NUAD_2	NUAD_3	ZFD_1	ZFD_2	ZFD_3	ZWD_1	ZWD_2	ZWD_3	Only identified by site	Reverse	Potential contaminant	Peptides	Razor + unique peptides	Unique peptides	Sequence coverage [%]	Unique + razor sequence coverage [%]	Unique sequence coverage [%]	Mol. weight [kDa]	Q-value	Score	Intensity	MS/MS count	Intensity DMEM_1	Intensity DMEM_2	Intensity DMEM_3	Intensity NUAD_1	Intensity NUAD_2	Intensity NUAD_3	Intensity ZFD_1	Intensity ZFD_2	Intensity ZFD_3	Intensity ZWD_1	Intensity ZWD_2	Intensity ZWD_3	MS/MS count DMEM_1	MS/MS count DMEM_2	MS/MS count DMEM_3	MS/MS count NUAD_1	MS/MS count NUAD_2	MS/MS count NUAD_3	MS/MS count ZFD_1	MS/MS count ZFD_2	MS/MS count ZFD_3	MS/MS count ZWD_1	MS/MS count ZWD_2	MS/MS count ZWD_3
#!{Type}E	E	E	E	E	E	E	E	E	E	E	E	C	C	C	N	N	N	N	N	N	N	N	N	N	N	N	N	N	N	N	N	N	N	N	N	N	N	N	N	N	N	N	N	N	N	N	N	N	N
#!{C:Group1}DMEM	DMEM	DMEM	NUAD	NUAD	NUAD	ZFD	ZFD	ZFD	ZWD	ZWD	ZWD
NaN	NaN	19.8049	NaN	NaN	NaN	NaN	NaN	NaN	NaN	NaN	NaN				1	1	1	22.5	22.5	22.5	13.988	0	38.188	1053100	1	0	0	1053100	0	0	0	0	0	0	0	0	0	0	0	1	0	0	0	0	0	0	0	0	0
NaN	NaN	19.7347	NaN	NaN	NaN	NaN	NaN	NaN	NaN	NaN	NaN				11	1	0	29.2	2.9	0	46.236	0	7.736	1003100	1	0	0	1003100	0	0	0	0	0	0	0	0	0	0	0	1	0	0	0	0	0	0	0	0	0
21.3958	23.0873	21.0097	18.297	NaN	NaN	NaN	NaN	18.7562	NaN	NaN	NaN			+	9	3	3	22.9	10.9	10.9	46.397	0	72.443	14013000	5	5335600	2861700	5733300	30771	0	0	0	0	52120	0	0	0	1	2	2	0	0	0	0	0	0	0	0	0
22.7822	24.0956	24.9129	21.4181	NaN	21.407	21.1799	NaN	21.4692	23.0431	NaN	NaN			+	3	1	1	4.8	2.4	2.4	46.941	0	44.206	72036000	3	16155000	12150000	33838000	3488600	0	1647700	1579600	0	2281700	895050	0	0	0	1	2	0	0	0	0	0	0	0	0	0
NaN	NaN	NaN	NaN	NaN	NaN	16.75	NaN	NaN	NaN	NaN	NaN				2	2	2	1.9	1.9	1.9	79.812	0	10.927	1070600	1	0	0	0	0	955620	0	114940	0	0	0	0	0	0	1	0	0	0	0	0	0	0	0	0	0
NaN	NaN	NaN	18.2995	17.8493	20.3477	19.03	24.8401	NaN	17.9252	19.1756	19.8038				2	2	2	30.1	30.1	30.1	15.328	0	55.454	31726000	2	0	0	2073800	480910	224950	5803300	1226600	17528000	0	55622	1184100	3148700	0	0	1	0	0	0	0	1	0	0	0	0
NaN	NaN	NaN	NaN	NaN	NaN	NaN	NaN	NaN	28.9379	NaN	NaN				1	1	1	5.8	5.8	5.8	38.133	0.0091743	6.3923	112480000	0	0	0	0	0	0	0	0	0	0	112480000	0	0	0	0	0	0	0	0	0	0	0	0	0	0
NaN	NaN	NaN	14.9029	16.1586	NaN	16.2563	16.7963	NaN	NaN	18.3121	16.2496				1	1	1	1.5	1.5	1.5	81.75	0	20.71	631930	1	0	0	0	15831	78810	0	95760	170600	0	0	187620	83313	0	0	0	0	0	0	0	0	0	0	1	0
21.1564	21.3623	21.7264	NaN	NaN	NaN	NaN	NaN	NaN	NaN	NaN	NaN				3	1	1	6.5	2.2	2.2	46.963	0	6.7298	8187300	2	2337300	1860600	3989400	0	0	0	0	0	0	0	0	0	0	1	1	0	0	0	0	0	0	0	0	0
NaN	NaN	NaN	NaN	19.5491	19.9799	NaN	18.7996	19.5677	NaN	18.1604	18.0465				2	2	2	16.5	16.5	16.5	56.854	0	11.631	3318200	3	0	0	0	0	378050	478040	0	465810	1198900	0	179780	617650	0	0	0	0	0	0	0	0	2	0	0	1
26.9351	27.6662	27.5529	29.9083	29.5283	28.9219	30.9537	29.7823	30.2454	31.3311	29.6673	30.3479			+	68	68	14	49.5	49.5	11.7	192.99	0	323.31	10029000000	335	53658000	87451000	70155000	914620000	671590000	441620000	2408500000	890240000	1291700000	437090000	1055300000	1707100000	3	2	5	24	41	20	50	25	45	40	36	44
22.0068	22.3717	21.8147	20.9327	21.9132	20.5596	21.7303	NaN	21.6807	21.7133	22.6919	23.4658			+	3	3	3	38.9	38.9	38.9	11.756	0	64.376	42505000	6	6435500	6524000	9642500	2596500	3589900	958180	1216500	0	1371300	1158600	2931600	6080200	0	0	1	0	0	1	1	0	0	1	0	2
23.4769	23.5992	22.893	24.5065	24.9807	25.7022	23.3325	23.4419	23.6259	22.1476	24.0498	23.7298			+	8	8	8	14.6	14.6	14.6	77.456	0	323.31	192850000	26	14012000	12884000	9244400	40182000	27570000	39660000	6717200	10989000	13795000	1969600	9778100	6047800	4	2	2	1	3	2	3	2	3	2	2	0
20.4311	19.6279	19.8003	NaN	NaN	NaN	18.8428	NaN	19.471	20.5563	NaN	NaN			+	14	1	1	39.8	2.7	2.7	53.661	0	43.336	4377500	2	1585300	518160	972730	0	0	0	317030	0	589330	394930	0	0	0	1	1	0	0	0	0	0	0	0	0	0
23.7313	22.1068	23.793	26.0869	25.1673	26.6562	25.6634	24.7539	24.9866	26.5949	25.1752	24.7556			+	17	17	17	47.2	47.2	47.2	55.207	0	197.91	468740000	47	12610000	7775700	17998000	64683000	53218000	95808000	63570000	40023000	51867000	8205600	39255000	13728000	2	1	4	6	5	6	5	3	3	1	5	6
19.7423	19.5103	18.6631	19.4044	20.4526	21.1836	20.2231	19.7961	19.3095	18.3423	18.9203	20.3209			+	3	3	3	5.8	5.8	5.8	67.703	0	75.519	10653000	12	1751600	1708100	1558000	1883900	597100	902400	677960	354620	346220	25901	261720	585440	1	1	0	2	2	1	1	0	0	1	1	2
NaN	19.9922	NaN	21.3916	NaN	NaN	18.8641	NaN	NaN	NaN	NaN	NaN			+	2	2	2	7.7	7.7	7.7	45.102	0	47.264	4628200	2	0	227680	0	3950900	0	0	449620	0	0	0	0	0	0	0	0	1	0	0	1	0	0	0	0	0
22.0937	21.659	21.8328	21.0874	21.1023	20.8198	21.6226	21.6618	20.5335	26.307	23.8175	23.5991			+	5	5	1	17.4	17.4	3.8	46.543	0	129.87	91258000	12	8778200	8230500	13427000	1358300	2913800	1233600	6616700	1762400	7150200	11071000	7383900	21332000	1	2	1	1	0	0	0	0	0	3	2	2
NaN	NaN	NaN	19.9795	NaN	NaN	NaN	NaN	NaN	19.4117	NaN	NaN			+	4	4	3	10.6	10.6	8.8	59.299	0	62.069	1399300	3	0	83114	0	1163700	0	0	0	0	0	152550	0	0	0	0	0	3	0	0	0	0	0	0	0	0
22.1099	19.8957	23.272	26.1833	27.9584	27.1536	29.4889	29.0123	28.0099	28.9193	29.7644	27.3822			+	44	44	44	57.6	57.6	57.6	92.273	0	323.31	3186100000	163	4334100	2656200	6321000	143510000	220580000	97666000	948170000	503320000	348040000	80751000	577200000	253590000	0	0	1	9	15	7	31	24	16	8	33	19
19.2188	NaN	19.3935	20.3814	NaN	NaN	NaN	NaN	NaN	NaN	20.1443	NaN			+	2	2	2	10.1	10.1	10.1	22.336	0	38.965	4032800	3	1164000	0	297770	2215000	0	0	0	0	0	0	356070	0	1	0	0	1	0	0	0	0	0	0	1	0
NaN	NaN	NaN	21.7004	20.3523	20.0946	20.5724	19.4027	NaN	20.5703	19.6666	20.8053			+	2	2	2	4.8	4.8	4.8	65.19	0	25.881	10065000	4	0	0	0	3966200	1217300	298200	1752500	214470	0	660370	994910	960800	0	0	0	2	1	1	0	0	0	0	0	0
22.9352	23.0401	23.4463	NaN	21.992	NaN	23.091	21.818	24.6494	NaN	21.6431	22.6161			+	2	1	1	27.5	15	15	8.5787	0	38.178	78871000	3	851880	680020	1136000	0	8791800	0	10659000	4704100	37137000	0	3671400	11240000	0	0	1	0	0	0	1	0	1	0	0	0
15.4589	18.0991	16.8008	24.0728	19.1077	14.5726	16.664	30.5013	23.1034	18.8719	26.0923	21.963			+	30	30	4	58.8	58.8	13.6	53.5	0	323.31	1468500000	61	32271	865700	3177800	39888000	7861600	173450	2056400	1209000000	42882000	2026400	144520000	16037000	0	0	0	6	0	0	0	37	3	0	12	3
NaN	NaN	NaN	NaN	NaN	NaN	NaN	21.0655	NaN	NaN	NaN	NaN			+	16	1	1	41.6	3	3	44.689	0.0093023	6.4336	1928500	1	0	0	0	0	0	0	0	1928500	0	0	0	0	0	0	0	0	0	0	0	1	0	0	0	0
NaN	NaN	NaN	NaN	NaN	NaN	NaN	27.9847	19.5782	NaN	20.5784	NaN			+	10	7	6	21	15.6	14.1	52.247	0	54.713	235400000	8	0	0	0	0	0	0	0	230790000	1207800	0	3405600	0	0	0	0	0	0	0	0	8	0	0	0	0
22.4028	23.8319	24.113	26.1705	26.1944	26.7694	25.8141	26.2815	24.9635	22.7052	24.8469	24.9686			+	12	12	12	16.8	16.8	16.8	70.505	0	227.25	499290000	37	29729000	4650500	8721600	49537000	103720000	63712000	36810000	101750000	34823000	3952100	27238000	34644000	1	2	0	4	5	7	5	5	2	3	2	1
27.4012	27.11	27.7842	29.2169	29.5502	28.1574	30.8823	30.42	30.1322	31.0123	30.7772	30.7551			+	4	4	4	25.1	25.1	25.1	24.409	0	126.46	11555000000	62	172840000	144820000	299800000	782000000	751250000	418610000	1191600000	806600000	1987000000	86385000	2264700000	2649500000	1	2	2	6	4	2	11	3	7	4	8	12
21.6446	21.6748	21.4588	22.4014	21.3343	22.3987	20.4998	22.355	21.1266	22.0638	21.7615	NaN			+	6	6	6	23.3	23.3	23.3	39.234	0	135.15	32649000	15	2651200	4673600	2224100	13406000	980740	1657200	1646600	970070	1959000	1878800	601890	0	3	2	1	4	1	1	0	1	0	1	1	0
21.1096	21.8456	20.7515	24.1814	24.4123	23.8836	25.5138	22.9952	25.0565	24.685	23.5641	25.6465			+	63	10	5	46.4	8.8	3	192.79	0	137.12	224080000	14	1930400	3719800	1627400	38916000	24778000	16956000	39163000	8690500	31425000	4445000	13318000	39112000	0	0	0	4	1	0	2	0	3	2	0	2
21.6645	22.8342	22.6272	21.3981	21.0896	21.6427	21.4978	23.4737	23.6447	23.5777	24.1564	23.7599			+	21	2	0	37.5	6.3	0	68.889	0	70.295	77276000	13	2277400	3281600	6059800	2075600	3000300	752990	3073300	10727000	11267000	4075400	16894000	13792000	0	2	2	0	1	1	0	1	1	1	1	3
24.3181	25.259	24.0816	22.7477	23.6296	23.301	23.9772	24.9306	25.5578	24.6916	26.4769	25.9648			+	16	3	3	29.6	6.1	6.1	68.709	0	108.18	345030000	22	27856000	16695000	27487000	9602400	1495600	5542300	12043000	30590000	61270000	5283500	68679000	78485000	1	1	0	0	1	0	1	3	2	1	7	5
28.8457	28.1036	27.6928	31.2512	28.6054	29.4674	29.8632	28.9371	29.5335	29.3957	28.4179	29.5781			+	9	9	9	90.8	90.8	90.8	15.184	0	266.3	8273000000	186	612010000	228520000	232030000	2408800000	581300000	1229600000	1007800000	307790000	699770000	99372000	286050000	580030000	7	1	1	28	22	28	18	15	24	11	7	24
23.9932	23.8249	23.6177	26.4134	24.0978	24.561	23.9562	NaN	23.7428	22.0953	22.1449	24.4386			+	5	1	1	32.4	8.3	8.3	15.954	0	11.788	232640000	3	20839000	11555000	17561000	78573000	24696000	29793000	13956000	0	16168000	672410	2662700	16162000	0	0	0	1	0	0	1	0	0	0	0	1
24.2864	25.0329	21.3203	19.2034	20.056	18.9485	21.1034	27.1101	22.6231	21.7916	20.8123	22.8171			+	13	10	6	30.5	25.6	16.3	51.621	0	197.35	192090000	18	15756000	23632000	829320	669600	1114800	358510	3237000	126610000	8111100	1257800	5600000	4910200	0	0	0	0	0	0	2	9	2	2	2	1
23.9049	23.5956	24.6408	25.0126	25.5366	25.8917	24.7359	26.0135	24.4191	23.6006	24.3196	24.394			+	7	7	7	11.9	11.9	11.9	67.011	0	90.48	344060000	11	9124000	6162600	18081000	47260000	79062000	86421000	16428000	26717000	18565000	623960	14475000	21136000	0	0	1	1	3	0	2	3	0	0	0	1
22.2179	23.4559	22.1822	25.6655	26.4612	26.4127	24.351	23.1514	25.1679	23.3814	24.8667	24.6024			+	10	10	10	19.9	19.9	19.9	53.339	0	117.24	365930000	29	2044200	3994700	10716000	78261000	76122000	58223000	37136000	10652000	34712000	2857300	23559000	27649000	0	1	2	4	3	3	3	0	5	0	5	3
24.6066	25.1581	26.3477	23.8	25.1374	26.0606	29.5905	28.2954	28.1168	26.7242	28.1071	28.4961			+	35	30	30	62.2	56	56	69.366	0	323.31	2279600000	112	12335000	15944000	26037000	13999000	420330000	19510000	671380000	442830000	267760000	29049000	122060000	238380000	3	0	4	3	5	4	16	18	22	2	12	23
34.7542	34.7506	34.5236	30.9408	30.6516	30.7511	31.1654	30.893	32.4909	32.1387	31.4825	31.5677			+	59	59	54	79.9	79.9	73.6	69.293	0	323.31	99299000000	875	25094000000	24220000000	28682000000	1575500000	1442900000	1334100000	2649000000	1731500000	5636600000	628200000	3169700000	3135100000	134	132	144	48	51	52	44	44	78	36	56	56
NaN	NaN	NaN	22.6599	NaN	22.2681	23.6261	22.3516	23.5711	24.1817	23.9567	24.2678			+	3	3	3	15.7	15.7	15.7	24.241	0	78.129	75009000	7	0	0	0	7628300	0	2316600	16154000	3702200	10231000	5404500	11398000	18173000	0	0	0	1	1	0	0	1	0	0	1	3
18.436	18.3778	17.9938	17.5234	NaN	18.7059	19.3225	18.8499	19.7618	18.6972	NaN	19.4107			+	3	3	3	2.2	2.2	2.2	138.44	0	17.597	2951200	2	52783	1369300	32876	16767	0	60936	188140	82334	110040	298210	0	739820	0	0	0	0	0	0	0	0	1	1	0	0
20.0332	21.9355	22.0965	24.3949	25.0898	22.2851	27.4515	24.864	26.3152	29.0061	27.2397	27.0535			+	24	24	15	44.3	44.3	31.7	66.017	0	323.31	732270000	68	1084600	1048800	3484300	22939000	23599000	2995800	165980000	58122000	67328000	122160000	119960000	143570000	1	2	0	2	4	0	8	3	10	19	10	9
25.6445	26.3714	25.4407	27.1822	27.5243	28.2353	26.9932	25.7879	26.5796	26.6573	26.5284	27.3489			+	29	29	29	35.8	35.8	35.8	91.215	0	323.31	1376100000	99	29856000	29767000	47399000	235830000	331690000	187120000	96113000	20421000	89966000	17896000	108490000	181570000	4	4	3	14	15	6	10	3	12	10	9	9
NaN	NaN	NaN	NaN	NaN	NaN	NaN	21.5895	19.1025	NaN	NaN	NaN			+	8	1	1	16.9	2.7	2.7	51.267	0	26.17	3340900	1	0	0	0	0	0	0	0	2773000	567820	0	0	0	0	0	0	0	0	0	0	1	0	0	0	0
30.8955	31.5722	32.1921	29.1677	27.6719	28.6672	29.7979	28.4905	29.9241	30.411	29.3497	29.6287			+	17	17	17	53.5	53.5	53.5	38.418	0	323.31	15691000000	445	2670300000	1686500000	4464300000	1042100000	339130000	674210000	1033600000	532870000	1507500000	136750000	877380000	726480000	47	54	54	44	26	33	31	21	36	25	35	39
21.683	24.2624	23.4184	24.1905	25.5125	23.8975	27.9227	26.4135	26.4903	25.2864	26.8187	26.6555			+	19	17	16	32	29.7	28.2	59.51	0	314.26	739590000	36	284820	9184400	6517400	31152000	54554000	7785200	160590000	138270000	94264000	13061000	117320000	106610000	0	1	0	3	1	1	7	5	2	3	3	10
NaN	19.9797	19.9784	20.0816	21.3226	19.7355	21.5609	25.7666	23.7492	22.4392	23.9725	22.274			+	11	6	2	16.3	10	3.6	62.378	0	71.359	87089000	8	0	7712.4	591730	116390	1298400	324710	6250000	53772000	8988600	3299100	8498000	3941500	0	0	0	1	1	0	0	3	1	1	1	0
28.435	27.2533	29.2173	31.0194	30.0775	29.5273	30.8348	29.5799	30.1521	31.4885	28.8948	29.5524			+	25	25	25	69.1	69.1	69.1	30.276	0	323.31	12074000000	317	218580000	242050000	419500000	2518000000	1542400000	1404400000	2079900000	840880000	1279200000	305740000	244740000	979200000	14	8	7	45	55	40	36	23	27	20	21	21
24.6094	23.0958	23.4571	23.4262	23.8105	24.2902	22.3645	23.3081	22.7554	25.596	22.2071	24.148			+	8	8	8	33.6	33.6	33.6	38.252	0	61.432	159360000	14	15588000	8687300	22471000	21486000	21289000	35699000	2181900	18640000	1643500	5307700	154930	6207400	1	1	1	0	1	0	1	0	4	4	0	1
NaN	22.3725	22.8523	24.946	21.7787	23.8681	21.6946	19.6792	21.0096	21.5661	20.5562	20.1002			+	7	7	7	15.9	15.9	15.9	51.113	0	186.31	72290000	14	0	271840	607230	31848000	7491300	11135000	11696000	1094100	2848300	1208100	1712800	2376900	1	0	1	5	0	2	2	1	1	0	1	0
NaN	NaN	NaN	NaN	NaN	NaN	NaN	23.5674	18.9298	NaN	18.3322	NaN			+	2	1	1	3	1.5	1.5	63.91	0.0047393	6.5349	11754000	1	0	0	0	0	0	0	0	10444000	965960	0	344010	0	0	0	0	0	0	0	0	1	0	0	0	0
26.1554	26.0419	25.1781	23.6782	23.9514	23.2847	24.0719	23.6313	23.2771	22.0203	23.34	23.9127			+	11	11	11	34.1	34.1	34.1	54.71	0	181.12	268640000	18	50619000	37529000	65717000	14783000	9292600	12440000	10604000	22185000	16172000	1987900	18996000	8317100	5	3	5	2	0	0	1	0	1	0	1	0
31.9959	31.6711	31.7995	28.7422	29.0844	30.5481	28.4514	28.0744	30.2655	28.6473	28.1737	28.8538			+	23	23	23	50.5	50.5	50.5	46.103	0	323.31	15815000000	476	3221800000	2029300000	4182400000	501590000	813580000	2204200000	565780000	273840000	1008700000	123620000	261460000	628750000	71	75	72	42	46	61	13	10	44	8	7	27
NaN	17.3015	NaN	23.2455	25.2059	23.047	25.5989	25.9918	25.3485	28.2217	26.3321	26.3941			+	19	19	18	44.6	44.6	43.5	62.129	0	323.31	293630000	69	0	12112	0	5888300	20590000	3418200	23434000	27078000	31348000	111790000	43515000	26556000	0	1	0	1	6	3	6	6	7	18	11	10
20.1758	22.0244	20.1981	22.7312	23.3199	21.9443	26.1815	25.407	25.5933	23.8829	25.1995	24.8976			+	18	15	11	34.9	30.7	24	65.865	0	167.28	234640000	32	464110	3907200	458600	8995700	11239000	2345600	38884000	46317000	46108000	9360100	36524000	30038000	0	3	0	2	2	0	4	2	5	5	5	4
26.2699	26.3792	25.8098	25.3573	26.7208	25.9325	24.9456	26.4704	25.6755	25.9482	26.2477	25.3425			+	19	19	19	45.2	45.2	45.2	52.347	0	323.31	744710000	63	90284000	66232000	98476000	42977000	139100000	48800000	33085000	53502000	70072000	5051500	50097000	47033000	7	4	5	3	5	7	3	7	7	2	6	7
23.2186	24.1709	24.3859	25.8064	25.2837	26.1444	25.7695	24.6884	25.5049	25.2248	24.9944	25.8147			+	12	12	12	28.6	28.6	28.6	51.723	0	239.04	412330000	37	16475000	5818800	32023000	96437000	29214000	28031000	55559000	9286800	47176000	20211000	21940000	50156000	3	2	2	3	6	2	3	2	4	4	3	3
15.3878	14.6331	NaN	NaN	NaN	NaN	17.985	NaN	15.8667	NaN	16.8341	18.3342			+	1	1	1	19.7	19.7	19.7	6.0282	0	9.7963	777310	2	47674	15012	0	0	0	0	216680	0	79130	0	176430	242390	0	0	0	0	0	0	1	0	0	0	0	1
NaN	NaN	NaN	18.9707	17.8553	17.0165	17.9348	29.5301	23.5412	17.0936	23.3964	18.8412			+	28	13	8	53.6	29.2	19.3	55.802	0	209.34	706550000	17	0	0	0	7212900	962670	92470	1286100	632270000	30204000	165430	30898000	3454500	0	0	0	0	0	0	0	15	1	0	1	0
22.2155	23.1498	23.174	26.0523	25.574	23.1808	21.5717	23.3266	22.4379	20.0776	20.5297	22.1807			+	5	5	5	50	50	50	11.202	0	166.4	185760000	31	5884500	2965500	8486700	82682000	40510000	3209000	22277000	8368900	7803500	103490	1775300	1691400	2	2	4	6	4	1	3	5	1	0	2	1
20.8408	20.4839	20.7375	25.0805	25.2798	24.8695	26.4519	27.1076	24.4912	25.3922	27.4275	26.1798			+	8	8	8	31.3	31.3	31.3	35.979	0	286.04	588150000	31	6822600	2705200	3849700	35182000	44167000	41999000	87797000	113370000	38304000	7653800	144900000	61393000	0	0	0	5	2	3	3	3	2	4	5	4
18.9357	18.9902	18.5981	21.401	18.8305	21.1823	NaN	NaN	NaN	NaN	NaN	18.9396			+	3	3	3	10.5	10.5	10.5	38.756	0	17.284	7101900	2	30616	734240	844020	3043200	26006	1979800	0	0	0	0	0	443990	0	0	0	1	0	1	0	0	0	0	0	0
30.5358	31.4294	30.8265	23.0401	20.3119	21.736	22.9604	16.932	27.1226	27.0879	21.3801	23.0843			+	41	41	38	67.9	67.9	64.4	75.829	0	323.31	6028000000	145	894690000	2169900000	2720300000	43439000	4559800	6281000	15741000	883980	142810000	10093000	5032400	14291000	42	32	36	4	3	2	3	0	14	3	3	3
24.507	24.8231	24.8425	26.6854	24.3921	26.58	25.7058	23.2939	24.9122	25.4743	23.1587	24.9128			+	17	17	17	22.2	22.2	22.2	99.55	0	224.33	447670000	37	17998000	17167000	25506000	92683000	16072000	124200000	61823000	10503000	43648000	6062800	5588700	26422000	4	3	5	5	3	3	4	1	3	2	1	3
23.6891	24.9453	24.7651	26.1788	24.8077	23.9842	24.2685	24.2307	24.367	24.8556	23.3901	23.3998			+	12	12	12	16.9	16.9	16.9	101.24	0	195.58	280590000	19	19293000	14198000	16124000	42326000	15603000	56024000	63971000	13150000	25299000	4016600	8075700	2507400	0	1	0	5	4	2	3	0	0	0	2	2
22.2722	23.0127	23.9283	25.6048	23.4028	24.7685	NaN	30.4915	25.6709	23.4807	26.6664	26.0054			+	24	24	6	67.1	67.1	17.1	46.213	0	323.31	1641000000	45	748830	2415700	3978400	51160000	24070000	5972900	0	1334000000	46465000	5733300	119780000	46640000	0	1	0	2	0	0	0	34	2	0	4	2
NaN	NaN	NaN	NaN	NaN	NaN	NaN	23.011	NaN	NaN	NaN	NaN			+	27	2	1	45	4.6	1.8	54.971	0	39.877	7588600	1	0	0	0	0	0	0	0	7427800	0	0	160860	0	0	0	0	0	0	0	0	1	0	0	0	0
NaN	NaN	NaN	19.33	NaN	NaN	19.2613	27.6349	21.074	20.8178	21.6909	NaN			+	22	8	2	62.5	23.8	5.5	47.237	0	250.81	188330000	14	0	0	0	1462000	0	0	1231600	170220000	6612200	1107400	7696500	0	0	0	0	1	0	0	0	10	1	0	2	0
24.1729	23.9032	22.1781	25.7348	25.9544	25.5043	25.4994	23.7463	23.3166	25.0167	23.1789	24.1427			+	21	21	21	17.9	17.9	17.9	188.74	0	323.31	323130000	35	5615000	5271400	2807100	87217000	83145000	51327000	28752000	12754000	12765000	1843500	12857000	18778000	0	1	1	7	6	2	8	2	2	1	1	4
NaN	NaN	NaN	NaN	NaN	NaN	NaN	NaN	22.5852	NaN	NaN	22.8186			+	2	2	2	4	4	4	65.056	0	16.534	57164000	3	2079200	1683000	5798900	5201100	2828900	3382200	11008000	4313400	6122100	265480	7502400	6979300	0	1	0	0	0	0	1	0	0	0	0	1
22.9253	23.2451	22.797	23.8414	24.5404	24.1157	24.3295	24.6126	23.2244	23.3176	25.839	25.8081			+	3	3	3	19.2	19.2	19.2	24.536	0	125.67	237530000	13	8333400	5901500	10675000	18836000	20862000	13265000	20521000	26750000	9051900	2857700	50362000	50119000	2	0	1	1	1	1	1	2	2	2	0	0
NaN	NaN	21.7038	21.0367	NaN	NaN	20.9193	NaN	20.7558	21.3265	20.9206	21.0156			+	3	3	3	4.9	4.9	4.9	68.886	0	20.789	14423000	8	0	0	3811300	2349700	0	0	2502300	0	1733300	558180	1584500	1884000	0	0	1	1	0	1	1	0	1	1	1	1
24.6327	24.9502	24.3609	27.6092	28.0164	26.6165	28.3674	27.7096	28.3176	28.6505	28.7177	28.2676			+	34	34	34	35.8	35.8	35.8	140.37	0	323.31	2234400000	120	10899000	21673000	25195000	251700000	187910000	80810000	334070000	179510000	343570000	112280000	365020000	321800000	1	0	0	10	12	3	16	16	16	11	16	19
21.7045	20.5166	20.7787	24.8267	25.7893	23.8987	24.3113	26.0978	24.7168	22.1384	26.0777	25.2149			+	16	16	16	8.3	8.3	8.3	248.98	0	165.4	317350000	31	6061700	1033400	3410100	27212000	85332000	26028000	19113000	50982000	16371000	677440	49614000	31511000	0	1	1	4	3	2	1	10	3	0	4	2
22.1674	22.8592	21.8981	25.9585	26.9858	26.2935	25.9741	27.332	25.5789	27.8799	27.6751	26.7351			+	22	22	2	20.7	20.7	2.2	129.39	0	323.31	933230000	62	3320800	2617300	3550800	73539000	111280000	75994000	102300000	171610000	47633000	39952000	143150000	158300000	0	2	0	4	4	4	4	11	7	3	12	11
21.6916	21.2496	23.314	25.3774	25.8354	24.8065	24.194	23.2073	23.1765	24.9452	25.8966	24.8115			+	17	17	17	24.8	24.8	24.8	93.089	0	215.27	284120000	37	1920000	2385900	6135600	59044000	78595000	24772000	16582000	12408000	12756000	4083000	37518000	27917000	0	1	0	7	8	5	2	1	3	2	5	3
NaN	20.6892	NaN	NaN	NaN	NaN	NaN	NaN	NaN	NaN	NaN	NaN			+	4	2	1	5.5	3.1	1.9	69.182	0	9.2278	1166900	1	0	1166900	0	0	0	0	0	0	0	0	0	0	0	1	0	0	0	0	0	0	0	0	0	0
22.825	NaN	20.1899	24.2584	NaN	22.6296	22.6865	NaN	22.3113	21.2616	NaN	20.9258			+	5	5	5	15.6	15.6	15.6	38.348	0	50.844	51132000	11	7763000	0	943160	21314000	0	3744700	8592900	0	5035700	601850	0	3136400	0	0	0	5	1	2	1	0	2	0	0	0
NaN	21.2136	NaN	22.0481	22.781	23.3889	22.3165	NaN	22.0268	NaN	23.0249	NaN			+	3	3	3	8.7	8.7	8.7	48.821	0	17.689	38265000	2	0	539920	0	4011000	6779700	12703000	3763800	25456	2469100	0	7973000	0	0	0	0	2	0	0	0	0	0	0	0	0
18.553	20.0776	NaN	22.0052	24.208	23.8369	22.6905	23.2708	21.6848	20.6805	21.6294	21.8089			+	3	3	3	12	12	12	29.091	0	35.533	65118000	4	111920	258030	0	6089800	18423000	7756500	14591000	7780900	3500700	188620	2643800	3774300	0	0	0	0	2	1	0	1	0	0	0	0
23.8328	23.5922	24.7998	26.2875	26.504	27.2061	28.0477	27.589	27.9224	29.4207	28.0638	27.611			+	8	8	8	49	49	49	22.144	0	287.93	1920500000	42	9606100	5423700	7686800	87958000	162700000	119970000	359800000	243820000	261670000	79372000	218390000	364130000	0	2	1	2	2	2	6	4	5	6	8	4
26.2933	26.4442	26.8971	25.0068	27.4344	26.4786	27.1959	28.5064	28.0579	26.9122	29.6794	29.6781			+	22	22	3	38.2	38.2	6.9	68.964	0	323.31	2837800000	104	82345000	136930000	199630000	47040000	239870000	103770000	94688000	386550000	364430000	34151000	837180000	311180000	2	5	7	3	8	5	7	16	13	7	22	9
NaN	NaN	NaN	NaN	NaN	NaN	NaN	NaN	19.3576	NaN	19.3814	20.5279			+	4	4	4	6	6	6	86.858	0	42.307	2760200	3	0	0	0	0	0	0	0	137770	712020	0	604340	1306000	0	0	0	1	0	0	0	0	0	0	0	2
24.1159	24.806	23.3551	22.8937	21.5603	22.4835	22.2835	NaN	21.9788	23.5117	21.5304	22.173			+	9	9	9	24.1	24.1	24.1	53.553	0	108.43	93370000	18	27677000	16674000	26187000	9427500	646950	4032900	2182400	0	4104900	1836100	98241	502640	3	3	2	1	0	1	3	0	3	2	0	0
NaN	NaN	18.8868	23.321	21.3674	23.6273	22.16	22.652	21.0207	NaN	23.3661	22.9984			+	5	5	5	10.3	10.3	10.3	75.166	0	39.251	56810000	9	0	0	448750	14816000	12011000	11187000	6000200	6612400	2439500	178570	2105800	1010100	0	0	0	1	2	2	1	1	1	0	1	0
21.7529	21.884	22.0716	26.142	26.7488	26.8383	25.918	23.3554	25.2555	23.1207	24.9042	26.0821			+	12	12	11	19.9	19.9	19.7	68.932	0	216.05	518380000	46	4387700	1546400	4458000	115920000	137860000	95397000	54781000	23734000	27473000	1459200	15977000	35390000	1	1	3	8	7	6	6	1	4	1	4	4
21.0037	21.2955	21.3312	23.388	23.8485	23.7851	22.5797	23.3012	22.7968	20.8334	22.5158	23.046			+	6	6	6	17.9	17.9	17.9	43.017	0	56.02	85019000	8	724380	190610	1446900	15176000	19271000	7698200	12538000	1952900	11663000	445310	1520200	12393000	0	0	0	1	2	0	1	0	1	1	1	1
26.399	25.6295	26.2566	28.8392	28.402	28.3579	27.9577	27.3532	27.5741	28.3138	28.3925	27.9753			+	28	28	28	34.1	34.1	34.1	85.411	0	323.31	2725000000	108	39427000	24046000	32470000	776850000	234530000	559090000	214380000	124150000	262380000	34208000	176000000	247430000	4	4	3	18	16	12	11	4	6	9	12	9
NaN	NaN	21.0031	22.2859	NaN	22.2595	21.1674	NaN	20.8694	NaN	NaN	21.6474			+	2	2	2	3.5	3.5	3.5	57.407	0	11.894	20062000	2	0	0	1608500	9322000	0	2996900	1832000	0	1172400	0	0	3129900	0	0	0	0	0	1	1	0	0	0	0	0
24.2969	24.7866	NaN	24.5956	24.9656	23.9482	23.7286	23.7493	23.8476	23.6372	22.6554	23.3934			+	5	5	5	10	10	10	61.998	0	37.969	183290000	10	2062700	2806600	0	31435000	48218000	31513000	19887000	11481000	15645000	1221300	6586400	12436000	0	0	0	3	2	0	1	2	1	0	1	0
28.4497	28.745	28.9497	25.604	24.4478	25.4149	24.2376	23.3265	26.3466	22.7979	23.7837	24.7988			+	15	15	2	40.9	40.9	3.8	53.341	0	273.03	1512700000	44	397110000	356120000	521530000	44663000	7365500	32364000	31808000	4745500	73609000	2503600	4860500	36006000	7	9	12	3	1	1	1	0	6	3	1	0
23.8331	24.5699	24.9815	28.403	29.5335	28.9077	29.7634	30.1278	29.6468	30.7002	31.1303	30.68			+	31	31	2	43.7	43.7	2.3	85.686	0	323.31	9136900000	178	18045000	12456000	19318000	625750000	1442900000	848600000	852290000	1319800000	745850000	154650000	1313100000	1784100000	1	2	1	16	21	14	20	25	15	10	29	24
29.3651	29.4319	28.6982	27.7155	25.6819	28.6021	26.7266	23.062	26.8341	27.6713	24.1357	26.0382			+	24	24	24	47.5	47.5	47.5	68.587	0	323.31	2833700000	82	645150000	517540000	557870000	403350000	64846000	335260000	81973000	4786700	134260000	9187100	8070500	71360000	18	16	14	11	2	3	7	0	5	4	1	1
24.7173	23.8363	26.5603	NaN	NaN	NaN	NaN	NaN	21.3052	NaN	NaN	NaN			+	7	7	7	34.7	34.7	34.7	23.182	0	53.961	148070000	12	24308000	20889000	102300000	0	0	0	0	0	568010	0	0	0	0	4	8	0	0	0	0	0	0	0	0	0
27.1882	27.0845	28.2597	24.8258	24.7148	25.8827	24.0393	23.1092	25.0982	21.63	23.52	23.7524			+	9	9	9	22.2	22.2	22.2	52.209	0	68.519	763700000	16	144000000	141470000	190620000	48965000	39522000	85944000	19023000	10528000	43157000	570560	11796000	28111000	3	5	2	1	1	1	1	0	0	1	0	1
26.5246	26.22	26.6724	27.5011	27.8708	28.2862	26.5866	25.3845	26.5203	26.4439	26.1408	26.5841			+	26	26	26	36.1	36.1	36.1	101.51	0	323.31	1407500000	102	46132000	36464000	70090000	183670000	171130000	280360000	181950000	55271000	105040000	13398000	99120000	164850000	8	4	9	15	12	12	7	5	7	4	10	9
22.4541	24.03	23.9379	21.5354	NaN	23.3853	21.2219	NaN	22.2277	20.7216	22.384	21.1507			+	3	3	3	14.2	14.2	14.2	26.133	0	83.241	69233000	7	3728000	4038500	22704000	12295000	0	8252200	3746900	0	8212400	103050	2133500	4019900	1	2	1	1	0	0	0	0	1	0	0	1
22.8289	22.4931	23.2045	24.5529	25.3832	22.4884	23.5916	24.8923	23.8417	24.7052	24.6184	23.7049			+	8	8	8	21.1	21.1	21.1	54.099	0	149.05	204160000	42	3180800	2148900	6631800	37806000	70677000	12167000	10193000	18935000	8729600	3480700	22169000	8039800	1	2	2	5	11	5	2	5	3	0	4	2
29.4829	29.5315	29.2875	27.8748	24.6836	28.5935	25.3035	23.438	25.9201	23.6309	22.6196	21.7914			+	11	11	11	42.9	42.9	42.9	42.663	0	239.49	2775700000	41	674800000	559240000	742230000	224460000	68810000	297500000	80887000	31046000	71390000	3098900	17544000	4734900	8	7	11	3	1	6	2	0	2	1	0	0
NaN	NaN	NaN	NaN	NaN	NaN	NaN	15.4664	NaN	NaN	NaN	NaN			+	24	1	1	41.2	3.7	3.7	54.195	0	7.0754	39786	1	0	0	0	0	0	0	0	39786	0	0	0	0	0	0	0	0	0	0	0	1	0	0	0	0
NaN	NaN	19.6968	NaN	NaN	NaN	NaN	NaN	NaN	NaN	NaN	NaN			+	2	2	2	8.5	8.5	8.5	43.315	0	21.478	977090	2	0	0	977090	0	0	0	0	0	0	0	0	0	0	0	2	0	0	0	0	0	0	0	0	0
NaN	NaN	NaN	NaN	NaN	NaN	NaN	NaN	NaN	21.1481	19.9167	19.2028			+	2	2	2	3.4	3.4	3.4	282.39	0	11.514	2849300	3	0	0	0	0	0	0	0	0	0	171490	1689900	987900	0	0	0	0	0	0	0	0	0	1	1	1
NaN	NaN	NaN	NaN	15.2096	NaN	NaN	24.0722	NaN	NaN	20.2343	NaN			+	16	3	0	37.6	7.1	0	49.411	0	19.261	16286000	6	0	0	0	0	13407	0	0	11409000	0	0	4863500	0	0	0	0	0	0	0	0	3	1	0	2	0
23.8718	24.4676	23.9371	26.7897	27.5533	25.0743	25.3583	27.2337	25.4238	27.6399	27.9738	26.185			+	18	18	18	58.4	58.4	58.4	46.228	0	323.31	1026000000	120	33678000	11623000	15170000	161520000	200990000	92043000	44083000	142860000	45612000	27290000	186060000	65018000	2	3	4	10	25	11	5	17	7	6	21	9
21.0712	21.3047	21.3057	22.1904	NaN	21.4998	21.0449	NaN	21.1486	20.6367	NaN	20.9776			+	4	4	4	12.9	12.9	12.9	52.129	0	26.668	22412000	3	1371400	1308500	2182800	8667500	0	2164800	2773100	0	1540100	263760	0	2139700	0	0	0	1	0	1	0	0	0	0	0	1
NaN	NaN	NaN	13.7227	NaN	NaN	NaN	24.9462	19.4131	NaN	20.0646	15.7004			+	9	9	6	66.8	66.8	42.9	21.825	0	100.31	30103000	15	0	0	0	17411	0	0	0	28408000	812810	0	774570	90590	0	0	0	1	0	0	0	8	3	0	3	0
NaN	NaN	NaN	NaN	NaN	NaN	NaN	23.6301	NaN	NaN	NaN	NaN			+	2	2	2	16.4	16.4	16.4	15.241	0	17.236	11409000	2	0	0	0	0	0	0	0	11409000	0	0	0	0	0	0	0	0	0	0	0	2	0	0	0	0
NaN	NaN	NaN	NaN	NaN	NaN	NaN	25.7251	19.49	NaN	NaN	NaN			+	6	3	3	32.4	16.2	16.2	22.406	0	26.207	49465000	4	0	0	0	0	0	0	0	48859000	605940	0	0	0	0	0	0	0	0	0	0	3	1	0	0	0
NaN	NaN	NaN	19.0506	NaN	NaN	NaN	26.2908	19.9252	NaN	22.8518	20.5995			+	6	6	6	50	50	50	13.48	0	84.343	81406000	6	0	0	0	308930	0	0	0	77324000	95395	0	3341800	336230	0	0	0	0	0	0	0	4	0	0	2	0
22.1886	22.2896	22.2102	24.7955	25.9817	24.2528	24.0972	24.1983	23.8693	26.2552	25.3735	25.0098			+	14	14	14	48	48	48	45.296	0	285.64	243790000	43	423790	995510	4865800	27018000	43385000	8743900	18621000	17011000	24694000	23524000	33477000	41031000	1	0	0	4	8	1	5	3	5	2	7	7
NaN	NaN	NaN	NaN	NaN	17.6073	NaN	27.8359	21.6298	NaN	20.6511	NaN			+	19	18	18	32.2	31	31	64.895	0	323.31	217880000	22	0	0	0	0	0	58169	0	209440000	4691000	0	3688500	0	0	0	0	0	0	0	0	19	2	0	1	0
28.1298	28.0202	27.5721	28.2966	27.8254	28.4827	26.841	24.3196	26.2911	25.8907	24.639	25.9691			+	22	22	22	26.5	26.5	26.5	106.19	0	323.31	1986700000	89	179390000	145720000	217600000	356110000	316100000	235840000	219020000	49372000	134810000	6311900	34987000	91453000	8	6	4	16	16	14	6	1	7	4	2	5
22.2318	19.2934	21.4067	23.5938	NaN	22.4498	20.3086	NaN	20.6794	21.1667	NaN	21.2958			+	5	5	5	17.5	17.5	17.5	46.017	0	44.98	34221000	12	5681300	515940	1723400	17421000	0	5883100	1049200	0	913320	226700	0	807370	2	2	1	4	0	0	2	0	1	0	0	0
26.8466	26.29	26.7804	24.0012	24.6794	25.7568	23.8008	24.0178	26.3479	22.1626	22.8217	24.0434			+	11	11	1	29.2	29.2	2.9	46.236	0	251.26	536900000	20	171500000	85893000	143380000	8495600	10699000	18419000	7803600	8035800	66768000	416870	6909800	8574900	5	3	6	0	1	1	0	0	3	0	1	0
24.7341	25.301	25.6838	21.9739	NaN	NaN	NaN	NaN	22.6521	NaN	NaN	21.9618			+	5	5	2	9.4	9.4	4.6	46.897	0	51.996	134340000	11	41054000	25124000	57966000	2138200	0	0	0	0	6244800	0	0	1812900	1	4	4	1	0	0	0	0	1	0	0	0
24.826	24.0182	23.6136	23.1491	21.8911	24.5189	21.0802	NaN	21.5735	NaN	NaN	20.0624			+	10	10	10	22.7	22.7	22.7	69.561	0	123.45	96732000	18	38160000	18097000	16123000	10561000	1802000	6584400	2458400	0	2530900	0	0	416450	9	2	4	1	0	2	0	0	0	0	0	0
26.2185	25.4707	24.4359	21.5946	NaN	23.8198	21.7921	NaN	22.6498	NaN	21.4764	23.4209				6	6	6	61.9	61.9	61.9	15.727	0	90.988	208590000	10	50060000	16942000	50069000	20615000	24771000	20310000	6041400	0	2716900	274860	6052500	10736000	4	3	1	1	0	1	0	0	0	0	0	0
NaN	NaN	NaN	NaN	NaN	NaN	20.1478	NaN	18.2245	20.1383	19.8688	19.7766				2	2	2	11.3	11.3	11.3	16.32	0	10.944	3355200	2	0	0	0	0	0	0	1305900	0	393590	270350	699790	685530	0	0	0	0	0	0	0	1	1	0	0	0
NaN	NaN	NaN	20.0511	19.1008	NaN	NaN	NaN	NaN	NaN	NaN	NaN				2	2	2	6.1	6.1	6.1	52.045	0	18.382	1797400	2	0	0	0	1397100	400360	0	0	0	0	0	0	0	0	0	0	2	0	0	0	0	0	0	0	0
NaN	NaN	NaN	21.2468	20.4787	23.1663	22.2949	19.2633	21.1097	20.6118	NaN	21.9276				2	2	2	6.7	6.7	6.7	54.51	0	16.894	25777000	4	0	0	0	9460500	423830	6189200	4303700	123240	2811600	176790	0	2288400	0	0	0	0	0	1	2	0	0	0	0	1
NaN	NaN	19.7918	21.5036	NaN	20.4072	NaN	NaN	NaN	NaN	NaN	NaN				2	2	2	4.4	4.4	4.4	51.297	0	17.858	5553900	4	0	0	902090	3697400	0	954410	0	0	0	0	0	0	0	0	0	2	0	1	0	0	1	0	0	0
25.0768	25.0718	24.5218	27.3329	22.7663	24.8345	25.7512	22.7849	24.8956	26.8003	22.3008	24.7258			+	23	23	23	70.2	70.2	70.2	51.424	0	323.31	466870000	79	25358000	36358000	49569000	163800000	9680900	37271000	52156000	3572200	36208000	22084000	1458900	29355000	2	2	6	18	1	9	11	3	8	6	1	12
NaN	NaN	NaN	NaN	NaN	NaN	19.7823	NaN	NaN	NaN	NaN	NaN				27	1	1	44.8	2.5	2.5	101.55	0	9.0456	940340	1	0	0	0	0	0	0	940340	0	0	0	0	0	0	0	0	0	0	0	1	0	0	0	0	0
22.6922	20.6021	NaN	21.7154	21.052	NaN	21.7049	21.3354	20.932	23.4645	21.3097	23.3079				3	3	3	31.1	31.1	31.1	16.265	0	29.549	44261000	4	18383000	699930	0	5342300	1859400	0	4877900	377540	1957100	411100	2772300	7580700	0	0	0	0	0	0	0	0	1	1	1	1
29.885	29.2686	28.3942	31.9885	29.4278	30.0833	30.7203	27.9889	29.6355	31.2469	28.0834	30.0852			+	14	14	10	90.3	90.3	66.2	15.859	0	323.31	14066000000	266	938840000	669110000	604650000	3992600000	907290000	2096100000	1707100000	299010000	892720000	116120000	186060000	1656200000	13	19	10	51	23	40	25	12	18	17	11	27
20.1084	19.8226	NaN	21.9916	21.8132	22.3913	22.0649	NaN	NaN	19.7175	NaN	20.7155				6	6	6	6.4	6.4	6.4	138.94	0	100.93	22072000	9	281800	276050	0	4244200	4903100	8205700	1973500	471830	1190000	41054	0	485130	0	1	1	1	0	2	1	2	1	0	0	0
NaN	NaN	NaN	21.2234	23.1075	21.1242	21.071	20.2856	19.8439	21.4377	21.55	21.8945				2	2	2	1.4	1.4	1.4	141.83	0	12.595	24456000	2	0	0	0	3338700	1152600	662850	6186700	1866800	1776500	713160	3134100	5624000	0	0	0	1	1	0	0	0	0	0	0	0
NaN	NaN	20.3845	21.054	19.4477	20.3742	20.0074	19.3759	22.7041	NaN	19.2365	19.2951				4	4	4	3.9	3.9	3.9	129.06	0	25.816	15858000	4	0	0	1771300	4899800	2212900	1206100	1867900	127790	2824800	0	98624	849030	0	0	0	0	0	0	1	0	2	0	1	0
NaN	19.0161	NaN	20.0189	NaN	20.9507	20.0716	NaN	19.8427	NaN	NaN	19.9525				1	1	1	3.3	3.3	3.3	33.886	0	7.1919	6054600	1	0	147590	0	966490	0	2481200	963320	0	778820	0	0	717120	0	0	0	0	0	0	0	0	1	0	0	0
NaN	NaN	NaN	20.5604	NaN	19.6064	20.6912	20.7983	21.0869	21.0172	21.541	20.8728				2	2	1	8.9	8.9	5	19.681	0	16.121	12535000	4	0	0	0	1826300	0	563720	1677100	1752200	2134100	527210	2384200	1670300	0	0	0	0	0	0	1	0	1	0	1	1
19.8216	18.9543	21.6342	23.6772	26.08	25.0866	24.762	26.6954	24.9026	24.5921	26.4178	24.9983				23	23	23	13.6	13.6	13.6	272.15	0	323.31	392530000	49	854640	804640	2617500	35427000	125710000	35914000	32710000	54592000	25107000	6497500	45822000	26473000	0	0	0	3	8	2	5	7	3	6	12	3
NaN	NaN	NaN	NaN	NaN	NaN	19.2716	20.397	NaN	19.102	20.2963	NaN				1	1	1	0.9	0.9	0.9	148.31	0	7.716	3051800	2	0	0	0	0	0	0	734240	1168400	0	129110	1020100	0	0	0	0	0	0	0	0	1	0	0	1	0
21.637	NaN	NaN	24.1492	23.3632	23.4555	21.8609	22.7715	21.8697	21.4391	22.933	22.6299				2	2	2	8.1	8.1	8.1	35.868	0	11.685	69533000	6	1046300	0	0	12614000	10712000	15739000	4563200	6603200	4809000	339140	6535200	6572300	0	0	0	1	1	0	0	2	0	1	1	0
NaN	21.9891	21.4515	24.053	24.2569	25.4751	24.067	23.6941	24.215	24.5706	23.3538	24.0041				9	9	9	20	20	20	50.243	0	82.717	181260000	18	0	2451300	2287600	36706000	26010000	31308000	16664000	13998000	16428000	355880	16760000	18287000	1	1	0	2	1	6	3	1	2	0	1	0
13.8725	NaN	NaN	14.7099	15.2555	16.9808	17.6332	NaN	16.1006	NaN	17.6007	17.8668				2	2	2	8.4	8.4	8.4	27.931	0	25.559	856280	5	13254	0	0	30821	43174	73361	151430	0	92160	0	116790	335290	0	0	0	0	0	1	1	0	0	0	1	2
22.5234	21.6117	23.0573	25.4673	25.4127	25.481	27.2718	26.4332	27.1742	26.3661	26.0615	26.3215				11	11	11	44.2	44.2	44.2	34.015	0	143.98	713250000	39	3252400	3715500	6354900	52954000	73256000	40257000	84259000	78164000	113640000	11032000	97315000	149050000	0	0	0	2	2	2	5	7	6	1	6	8
17.1832	NaN	16.6644	NaN	NaN	NaN	17.467	19.0386	NaN	NaN	NaN	NaN				2	2	2	0.9	0.9	0.9	242.48	0	12.237	979590	2	118350	0	283850	0	0	0	278610	298780	0	0	0	0	1	0	0	0	0	0	0	1	0	0	0	0
NaN	NaN	NaN	NaN	NaN	NaN	22.3396	22.789	NaN	20.9512	21.8529	21.839				2	2	2	21.8	21.8	21.8	16.938	0	48.523	17582000	4	0	0	0	0	0	0	5212300	1972400	0	875170	3883100	5639100	0	0	0	0	0	0	0	0	0	2	1	1
NaN	NaN	19.0926	17.801	20.1071	20.3544	19.6273	18.6518	NaN	NaN	18.2552	18.812				2	2	2	4.6	4.6	4.6	41.06	0	12.324	5168400	5	0	0	1253900	140790	1786600	583070	561760	203310	0	0	134980	503960	0	0	0	1	2	1	0	0	0	0	0	1
22.4986	23.8319	23.9599	21.6527	22.2124	NaN	22.0654	NaN	22.368	NaN	22.0425	22.0674				2	2	2	11.5	11.5	11.5	21.068	0	18.616	60475000	2	17161000	12872000	18897000	2687300	1941300	0	1680300	0	2472500	0	1284000	1479500	0	0	1	1	0	0	0	0	0	0	0	0
NaN	NaN	NaN	20.454	NaN	NaN	21.4803	NaN	20.8474	21.5838	20.4926	NaN				1	1	1	16.7	16.7	16.7	10.692	0	93.541	8618600	3	0	0	0	1558300	0	0	3587200	0	1797000	662710	1013400	0	0	0	0	1	0	0	0	0	0	1	0	1
NaN	NaN	NaN	21.6909	22.3715	23.2055	22.943	23.0315	23.2348	20.7439	23.0338	23.6177				3	3	3	10	10	10	31.57	0	19.546	62266000	7	0	0	0	3719700	6439200	4690800	16074000	4212100	11432000	760790	9019800	5918000	0	0	0	1	1	0	1	1	2	1	0	0
NaN	NaN	NaN	19.6248	NaN	20.3144	19.0896	NaN	NaN	NaN	NaN	19.174				1	1	1	7.7	7.7	7.7	17.6	0	9.3026	3071300	2	0	0	0	882880	0	1004600	604390	0	0	0	0	579450	0	0	0	1	0	1	0	0	0	0	0	0
23.7408	23.0988	24.1055	20.2744	22.2355	23.0922	21.2639	22.8642	22.6386	20.0967	22.7834	22.2956				3	3	3	11.3	11.3	11.3	37.994	0	96.854	78264000	14	21016000	17582000	13432000	2307300	2705300	3920500	1540000	3532200	4705100	55429	4746300	2722000	2	1	0	1	2	0	1	1	3	1	2	0
NaN	NaN	NaN	NaN	15.3348	15.5781	16.5363	16.1918	16.2049	NaN	15.4298	16.4699				1	1	1	6.5	6.5	6.5	28.794	0	7.4198	441460	3	0	0	0	0	41197	39403	106010	64968	75491	0	30076	84316	0	0	0	0	1	1	0	0	0	0	0	1
NaN	NaN	NaN	NaN	NaN	NaN	NaN	NaN	17.6743	NaN	NaN	NaN				1	1	1	13.5	13.5	13.5	17.114	0	7.5869	211000	1	0	0	0	0	0	0	0	0	211000	0	0	0	0	0	0	0	0	0	0	0	1	0	0	0
18.0719	19.5971	19.336	22.0376	22.6186	21.2221	24.3645	23.7489	25.0861	20.0028	26.2615	26.3733				7	7	7	23	23	23	44.47	0	134.17	227480000	20	554780	606140	31628	7878800	9180900	4844800	24785000	11185000	42867000	4108800	70864000	50571000	0	0	0	0	1	0	3	1	4	2	5	4
18.0597	18.0319	18.7844	24.3259	26.91	26.2939	26.2247	25.8109	24.2004	23.8506	25.066	25.1524			+	15	15	14	23.7	23.7	22.4	82.362	0	215.41	421520000	70	3979500	31524	6922400	60356000	71484000	76780000	66191000	49483000	18278000	7203300	33852000	26958000	1	1	0	10	13	5	8	6	8	3	7	8
NaN	NaN	NaN	NaN	NaN	NaN	NaN	NaN	NaN	NaN	NaN	18.3801				1	1	1	5.4	5.4	5.4	18.45	0.0091324	6.3415	1156900	0	0	7732.3	0	15743	33832	23878	331660	0	0	30129	401540	312430	0	0	0	0	0	0	0	0	0	0	0	0
NaN	NaN	NaN	NaN	NaN	NaN	NaN	21.3529	NaN	NaN	NaN	NaN				1	1	1	9.1	9.1	9.1	14.678	0	9.231	2353600	2	0	0	0	0	0	0	0	2353600	0	0	0	0	0	0	0	0	0	0	0	2	0	0	0	0
NaN	NaN	NaN	16.2365	NaN	NaN	16.602	16.5118	18.5535	NaN	NaN	16.3602				4	3	3	8.8	7.3	7.3	53.727	0	23.689	6818100	1	0	0	5692700	88857	0	42999	136650	101620	322440	346960	0	85823	0	0	0	0	0	0	0	0	1	0	0	0
NaN	NaN	NaN	NaN	NaN	NaN	21.7867	21.5476	21.2836	19.9031	22.4489	21.9284				1	1	1	2.2	2.2	2.2	45.487	0	6.6495	17623000	3	0	0	0	0	0	0	3947100	2666700	2398400	215240	4727000	3668400	0	0	0	0	0	0	0	0	0	1	1	1
NaN	24.7834	24.5666	22.6531	22.8069	NaN	23.0446	NaN	NaN	NaN	23.1248	NaN				2	2	2	2.6	2.6	2.6	94.602	0	11.734	81919000	3	0	27888000	34398000	2372700	5252100	0	3782500	2639600	183780	0	3334700	2067700	0	0	0	0	1	0	0	1	0	0	0	1
NaN	NaN	NaN	19.3689	20.3654	20.4788	20.4697	20.5649	20.2117	NaN	NaN	NaN				1	1	1	1.3	1.3	1.3	128.93	0.0092593	6.4315	7254100	1	0	0	0	390230	1194400	1282400	1663200	1598900	1125000	0	0	0	0	0	0	0	1	0	0	0	0	0	0	0
NaN	NaN	NaN	18.5354	19.0487	NaN	19.8402	19.7225	19.7838	NaN	19.6988	20.2505				1	1	1	1.3	1.3	1.3	88.093	0.009434	6.4765	5431400	1	0	0	0	212900	378680	0	1203900	861690	1076900	0	780590	916850	0	0	0	0	0	0	0	0	0	0	0	1
NaN	NaN	NaN	20.2808	NaN	NaN	20.6703	NaN	NaN	19.6971	20.521	19.7392				3	3	3	7.3	7.3	7.3	74.407	0	25.633	5813000	5	0	0	0	1604000	0	0	2429400	138500	0	138770	1157300	345060	0	0	0	0	0	0	1	1	0	0	1	2
24.7543	23.9852	25.413	27.8531	25.8914	27.0711	27.9074	24.5585	26.4269	24.905	23.7496	25.7348				13	13	13	42.4	42.4	42.4	41.792	0	177.83	936480000	28	27979000	23133000	43387000	260960000	75932000	215400000	136550000	25015000	59028000	8432300	7900100	52762000	2	1	3	7	2	1	6	1	1	3	1	0
NaN	NaN	NaN	20.4443	NaN	NaN	NaN	NaN	NaN	NaN	NaN	NaN				1	1	1	6.5	6.5	6.5	20.987	0	12.349	1605900	1	0	0	0	1605900	0	0	0	0	0	0	0	0	0	0	0	1	0	0	0	0	0	0	0	0
NaN	NaN	NaN	NaN	NaN	14.5665	NaN	16.6857	NaN	NaN	NaN	NaN				2	2	2	19.4	19.4	19.4	11.367	0	12.965	13616000	1	0	0	13504000	0	0	19267	0	92632	0	0	0	0	0	0	0	0	0	0	0	1	0	0	0	0
NaN	NaN	NaN	NaN	19.4028	NaN	NaN	NaN	20.2572	NaN	NaN	NaN				2	2	2	12.2	12.2	12.2	17.869	0	13.309	1945300	4	0	0	0	0	681190	0	0	0	1264100	0	0	0	0	0	0	2	0	1	0	0	1	0	0	0
NaN	NaN	20.0725	21.5739	NaN	22.7732	20.1092	22.5038	20.3636	NaN	NaN	NaN				3	3	2	14.7	14.7	10.6	27.745	0	100.48	18532000	6	0	0	1357600	3639100	0	5852600	1271200	4882800	1271500	0	0	257240	0	0	0	1	0	1	1	1	1	0	0	1
26.2746	26.388	26.4684	25.7121	26.5662	25.8635	22.5551	25.2759	23.7801	NaN	25.3429	24.5567				5	5	5	13.4	13.4	13.4	50.14	0	31.109	606610000	8	57652000	46570000	86717000	238020000	84888000	25893000	8603000	18966000	6538700	0	20705000	12065000	0	0	0	1	0	0	2	1	1	0	2	1
19.5408	19.0508	NaN	19.1403	20	20.3208	19.4601	NaN	18.2303	NaN	NaN	NaN				1	1	1	1.1	1.1	1.1	92.601	0	6.756	4873600	3	814000	400020	0	530170	1024700	1113600	660100	0	331070	0	0	0	1	1	0	0	0	0	0	0	1	0	0	0
NaN	NaN	NaN	NaN	NaN	NaN	NaN	NaN	NaN	NaN	NaN	17.2017				1	1	1	1.2	1.2	1.2	261.89	0	6.5696	138040	0	0	0	0	0	0	0	0	0	0	0	0	138040	0	0	0	0	0	0	0	0	0	0	0	0
NaN	NaN	NaN	22.6867	20.1549	NaN	NaN	NaN	NaN	NaN	NaN	NaN				1	1	1	3.1	3.1	3.1	49.924	0	7.9361	8746100	1	0	0	0	7598900	1147200	0	0	0	0	0	0	0	0	0	0	1	0	0	0	0	0	0	0	0
NaN	NaN	NaN	NaN	NaN	NaN	NaN	NaN	NaN	NaN	NaN	19.1399				1	1	1	16.3	16.3	16.3	10.281	0.0092166	6.4066	2283600	0	0	0	0	0	0	0	0	0	0	642520	1112000	529030	0	0	0	0	0	0	0	0	0	0	0	0
NaN	NaN	NaN	NaN	NaN	NaN	18.439	18.4835	18.1443	NaN	18.7252	18.4439				2	2	2	0.9	0.9	0.9	312.25	0	12.628	1649500	2	0	0	0	0	0	0	350910	314490	225580	0	447180	311330	0	0	0	0	0	0	0	0	0	0	1	1
NaN	NaN	NaN	23.8156	25.6693	25.6648	25.8802	25.7155	24.8104	26.6168	26.1362	26.4801				9	9	9	19.8	19.8	19.8	67.16	0	105.01	468440000	19	0	0	0	3380800	42125000	37069000	68198000	50322000	52533000	7203300	88681000	118930000	0	0	0	2	1	0	2	3	1	2	5	3
21.5364	NaN	NaN	21.7043	20.7345	NaN	24.5709	24.3733	23.1399	NaN	23.6847	24.3535				2	2	2	3.5	3.5	3.5	112.24	0	12.148	94535000	4	1940200	0	0	2550700	1714900	0	33425000	14379000	10303000	0	11625000	18599000	0	0	0	0	1	0	0	1	1	0	0	1
NaN	NaN	NaN	19.998	21.6685	22.0165	20.2703	21.3657	20.8602	18.3664	21.0587	21.8202				2	2	2	12	12	12	27.89	0	84.735	18800000	10	0	0	0	1457200	3415600	3655700	1607400	1067300	2030100	76290	1878400	3611800	0	0	0	1	1	1	1	1	1	0	2	2
NaN	NaN	NaN	17.2721	17.9965	18.902	20.194	20.041	20.2367	17.5932	20.93	22.4311				3	3	3	13.1	13.1	13.1	24.967	0	33.079	11114000	13	0	0	0	103480	149280	230140	726590	550620	1584300	25123	2219700	5525200	0	0	0	1	2	1	2	1	1	0	1	4
NaN	NaN	NaN	17.7782	17.8567	19.3367	NaN	NaN	NaN	NaN	NaN	NaN				1	1	1	1.4	1.4	1.4	124.95	0	28.111	1008900	4	0	0	0	249360	222380	537120	0	0	0	0	0	0	0	0	0	2	1	1	0	0	0	0	0	0
NaN	NaN	NaN	18.8832	NaN	NaN	NaN	22.1632	NaN	NaN	NaN	NaN				7	1	0	11.8	2	0	59.035	0	8.7252	4671500	1	0	0	0	544240	0	0	0	4127300	0	0	0	0	0	0	0	0	0	0	0	1	0	0	0	0
NaN	NaN	NaN	NaN	NaN	NaN	NaN	20.0434	NaN	NaN	NaN	14.3004				1	1	1	1.4	1.4	1.4	86.527	0.0090909	6.2807	968030	1	0	0	0	0	0	0	0	949550	0	0	0	18478	0	0	0	0	0	0	0	1	0	0	0	0
NaN	NaN	NaN	20.7882	20.0733	20.9142	NaN	NaN	NaN	NaN	NaN	NaN				1	1	1	2.3	2.3	2.3	76.608	0	8.581	4763700	1	0	0	0	1851800	947480	1964500	0	0	0	0	0	0	0	0	0	1	0	0	0	0	0	0	0	0
NaN	NaN	NaN	NaN	NaN	NaN	21.0456	NaN	20.8886	23.6835	21.1265	21.7776				3	3	3	4.8	4.8	4.8	79.972	0	55.337	18269000	4	0	0	0	1411100	1746200	0	3452800	0	1894200	2382300	2281800	5100100	0	0	0	0	0	0	0	0	1	1	0	2
NaN	NaN	16.5667	NaN	NaN	NaN	NaN	NaN	NaN	NaN	NaN	NaN				2	2	2	3.9	3.9	3.9	70.258	0	17.765	111600	2	0	0	111600	0	0	0	0	0	0	0	0	0	0	0	1	0	0	1	0	0	0	0	0	0
NaN	NaN	18.2573	19.0734	21.9679	20.3124	NaN	21.4478	20.3725	19.9919	23.5634	NaN				1	1	1	1.1	1.1	1.1	79.934	0	6.6081	20228000	2	0	0	258010	590060	2859000	1509600	0	5439300	2041400	297990	7232400	0	0	0	0	0	1	0	0	0	0	0	1	0
NaN	NaN	NaN	NaN	18.9949	NaN	18.5673	19.4108	19.8071	20.0538	18.9416	19.173				3	3	3	6.5	6.5	6.5	50.133	0	25.125	3381200	4	0	0	0	0	341360	0	413990	543300	1080200	329770	265380	407170	0	0	0	0	0	0	1	0	1	0	1	1
NaN	NaN	NaN	17.7545	19.962	19.7097	19.1807	18.7226	18.9154	NaN	19.3701	19.784				3	3	3	4	4	4	104.54	0	32.177	4619300	4	0	0	0	33257	478680	1719300	768950	181330	99659	0	130400	1207600	0	0	0	0	1	0	2	0	0	0	0	1
NaN	NaN	NaN	17.3106	NaN	NaN	18.4239	18.506	18.1572	NaN	20.3721	18.1669				3	3	3	4.9	4.9	4.9	67.974	0	16.11	2486100	2	0	0	0	26884	0	0	476840	540270	55153	0	1336200	50745	0	0	0	0	0	0	0	0	0	0	2	0
NaN	NaN	NaN	20.3333	21.9281	22.1679	22.4013	22.9908	22.7043	22.7696	21.8962	21.9707				2	2	2	8.9	8.9	8.9	26.399	0	16.146	43741000	2	0	0	0	9957400	147350	3025300	8428000	6648600	4750100	105300	4779700	5899600	0	0	0	1	0	0	1	0	0	0	0	0
22.0931	21.6082	20.2823	25.0945	25.4844	24.87	23.5036	25.4694	24.7239	21.2252	25.4516	25.3022				5	5	5	9.3	9.3	9.3	70.993	0	47.266	276620000	12	7261500	7371100	80559	50688000	66316000	38466000	9786800	22528000	17212000	348990	30285000	26277000	0	0	0	4	1	1	0	2	2	1	0	1
19.6765	NaN	NaN	NaN	20.0269	21.5125	19.9735	20.3209	NaN	NaN	20.6198	NaN				3	3	3	16.4	16.4	16.4	40.463	0	22.19	7518600	5	329730	0	0	0	526640	2996900	519040	1462300	0	0	1684100	0	0	0	0	1	0	2	0	0	0	0	1	1
NaN	NaN	NaN	NaN	NaN	18.2923	18.8856	20.0913	19.0904	NaN	19.0856	19.0408				1	1	1	3	3	3	44.859	0.0093897	6.4594	3280900	2	0	0	0	0	0	221450	539000	899700	645050	0	419490	556210	0	0	0	0	0	0	0	1	0	0	1	0
29.3656	29.7114	29.4293	31.874	31.5045	31.3479	29.8776	28.7751	29.7632	30.3482	29.0264	29.891			+	81	81	81	57.1	57.1	57.1	187.25	0	323.31	16206000000	373	395220000	251790000	458600000	3948600000	3953600000	3507400000	869700000	565050000	992690000	84381000	344440000	834540000	11	18	18	72	69	55	26	14	27	17	18	28
21.5471	NaN	NaN	25.3879	23.6883	23.6044	26.054	24.3586	25.5016	26.5531	24.3847	25.4942				4	4	4	27.5	27.5	27.5	21.401	0	103.97	319040000	24	383750	0	0	54576000	7489000	15394000	107630000	18448000	49812000	16343000	18905000	30059000	1	0	0	2	3	0	2	4	3	2	3	4
NaN	NaN	NaN	20.8601	20.4178	22.7891	NaN	NaN	19.821	NaN	NaN	20.0878				1	1	1	1.4	1.4	1.4	75.782	0	6.7126	11720000	1	0	0	0	3680800	1740700	4491000	0	0	781110	0	0	1026600	0	0	0	0	0	1	0	0	0	0	0	0
NaN	NaN	NaN	17.4	17.7014	19.596	18.1163	NaN	18.345	16.7146	NaN	18.3815				1	1	1	5	5	5	29.677	0	7.4735	2082700	1	0	0	0	144560	191690	435300	361560	0	480190	10864	0	458530	0	0	0	0	0	1	0	0	0	0	0	0
NaN	NaN	NaN	NaN	NaN	NaN	NaN	NaN	NaN	NaN	NaN	17.6545				2	2	2	6.9	6.9	6.9	47.637	0	11.726	188930	2	0	0	0	0	0	0	0	0	0	0	0	188930	0	0	0	0	1	0	0	0	0	0	0	1
NaN	NaN	NaN	NaN	NaN	NaN	20.2926	NaN	NaN	NaN	20.6458	20.4433				2	1	1	2.6	1.6	1.6	105.97	0	69.87	3994800	3	0	0	0	0	0	0	1339400	0	0	0	1349600	1305800	0	0	0	0	0	0	0	1	0	0	1	1
NaN	NaN	NaN	21.5937	22.2267	23.286	21.5362	NaN	20.2151	NaN	22.7584	21.0856				3	3	3	9.1	9.1	9.1	51.272	0	58.887	27946000	7	0	0	0	3719100	4531500	12719000	1424800	0	283880	0	4422500	844820	0	0	0	1	1	3	1	0	0	0	1	0
NaN	NaN	NaN	NaN	NaN	NaN	NaN	NaN	NaN	NaN	20.2314	NaN				1	1	1	1.6	1.6	1.6	82.905	0	9.3048	1012700	1	0	0	0	0	0	0	0	0	0	0	1012700	0	0	0	0	0	0	0	0	0	0	0	1	0
NaN	NaN	NaN	19.9737	NaN	20.3135	17.9094	NaN	NaN	NaN	NaN	NaN				2	1	1	9.8	5.7	5.7	27.764	0	56.614	2450400	2	0	0	0	1158900	0	1034700	256740	0	0	0	0	0	0	0	0	1	0	1	0	0	0	0	0	0
NaN	NaN	NaN	18.2642	15.8339	18.8849	18.2238	16.3438	17.3926	NaN	16.0804	18.169				2	2	2	11.6	11.6	11.6	35.706	0	13.123	1661900	5	0	0	0	315190	51060	493900	283980	60462	172200	0	45053	240080	0	0	0	2	1	0	1	0	0	0	0	1
20.2516	19.7558	20.3688	NaN	19.7728	NaN	20.5064	21.4545	20.339	22.3289	22.5277	21.7887				4	4	4	15.1	15.1	15.1	27.878	0	27.814	19553000	5	51454	17861	69591	1920000	1877500	0	2221900	2791900	2887600	1763100	1880200	4072400	0	0	0	0	0	0	1	0	1	0	2	1
NaN	NaN	NaN	NaN	NaN	NaN	NaN	NaN	NaN	NaN	NaN	18.0392				2	2	2	4.1	4.1	4.1	35.686	0	10.757	1051800	1	0	0	0	283680	107450	108410	138380	0	0	0	167200	246680	0	0	0	0	0	0	0	0	0	0	1	0
NaN	NaN	NaN	16.7619	16.0677	18.4137	17.614	17.6517	16.7936	NaN	16.0961	17.6933				1	1	1	7	7	7	22.426	0	11.87	1226300	7	0	0	0	125080	67504	277290	209210	180940	114590	0	57627	194090	0	0	0	1	1	0	1	1	1	0	1	1
NaN	NaN	NaN	16.2335	17.0272	17.6143	17.5357	18.3127	17.4242	NaN	NaN	NaN				2	2	2	5.3	5.3	5.3	62.481	0	11.519	1020700	2	0	0	0	32365	84930	118620	182380	451230	151150	0	0	0	0	0	0	0	0	1	1	0	0	0	0	0
NaN	NaN	NaN	23.0464	24.7851	22.4027	25.6583	24.6737	NaN	NaN	NaN	23.6942				1	1	1	2.5	2.5	2.5	40.786	0	6.8897	136820000	4	0	0	0	7245000	22351000	2819500	75030000	18501000	0	0	1090100	9778200	0	0	0	0	1	0	0	1	0	0	1	1
18.7798	NaN	NaN	20.8818	NaN	21.6638	20.8408	NaN	20.684	19.2442	NaN	22.2026				1	1	1	4.8	4.8	4.8	26.689	0	28.876	13420000	1	113240	0	0	2349200	0	4900400	2056100	0	1600300	47150	0	2353500	0	0	0	0	0	0	0	0	0	0	0	1
21.4715	21.5291	NaN	22.5478	21.8087	22.1323	21.4255	22.4676	21.5601	19.8629	NaN	21.2836				3	3	3	9.3	9.3	9.3	36.723	0	31.717	32184000	4	2485200	1954900	0	6696900	2920200	9089700	1427100	5099500	1663600	34307	0	812780	0	0	0	2	2	0	0	0	0	0	0	0
NaN	NaN	NaN	21.1741	21.1974	NaN	21.137	20.9839	20.9163	20.9862	21.7156	21.0402				2	2	2	8.6	8.6	8.6	25.802	0	14.081	17065000	3	0	0	0	3323300	1729200	0	2139000	1881900	2342000	309010	2719100	2621500	0	0	0	0	0	0	1	1	0	0	1	0
NaN	NaN	NaN	NaN	19.8817	20.5641	20.041	19.6061	NaN	18.6141	18.9987	20.23				1	1	1	8.4	8.4	8.4	18.518	0	8.0593	5749600	1	0	0	0	0	929960	1935300	1230700	567480	0	35712	228900	821620	0	0	0	0	0	0	0	0	0	0	0	1
NaN	18.9436	19.6185	21.774	23.5055	23.0066	25.0725	25.2678	24.1972	19.7879	23.3744	22.5421				8	8	8	17.2	17.2	17.2	62.44	0	186.86	127980000	19	0	191080	526930	5451100	18243000	24656000	26176000	29310000	14089000	300500	6748000	2292300	0	0	0	1	1	2	4	4	2	0	4	1
NaN	NaN	NaN	15.7953	NaN	16.8748	16.0317	NaN	16.3277	NaN	NaN	16.4028				2	2	2	4.3	4.3	4.3	47.231	0	11.737	381400	2	0	0	0	39724	0	125160	67021	0	74475	0	0	75024	0	0	0	0	0	0	1	1	0	0	0	0
17.1846	17.2188	17.3465	19.5693	19.4682	21.2005	21.2463	NaN	19.5233	NaN	18.7524	NaN				2	2	2	4.2	4.2	4.2	69.871	0	41.496	7699600	5	19762	14079	26391	2541600	2288500	2319000	247970	0	173110	0	69240	0	0	0	0	2	0	2	1	0	0	0	0	0
NaN	19.2551	NaN	18.9405	NaN	19.7992	NaN	NaN	NaN	NaN	NaN	19.426				1	1	1	1.4	1.4	1.4	87.466	0	6.7162	2377700	1	0	349770	0	584140	0	855570	0	0	0	0	0	588170	0	0	0	1	0	0	0	0	0	0	0	0
NaN	NaN	20.7499	21.563	NaN	NaN	NaN	NaN	NaN	NaN	NaN	20.344				1	1	1	1.5	1.5	1.5	84.73	0	15.062	6769900	1	0	0	2413500	3261200	0	0	0	0	0	0	0	1095100	0	0	0	1	0	0	0	0	0	0	0	0
30.3601	30.1706	30.4401	28.8141	28.2122	28.7237	27.6272	28.0305	28.1939	28.7622	28.477	27.6754			+	58	58	58	53.8	53.8	53.8	167.57	0	323.31	6588300000	205	1423500000	1171400000	1438000000	522550000	469400000	515230000	119390000	266100000	256500000	28634000	222790000	154790000	26	24	36	20	15	7	12	12	17	7	16	13
NaN	NaN	13.58	NaN	13.5285	NaN	14.5435	21.5318	15.8533	NaN	15.5432	15.1199				3	3	3	5.2	5.2	5.2	81.82	0	38.429	2847800	4	0	0	20460	0	9365.1	0	28550	2569900	79658	0	94284	45648	0	0	0	0	0	0	0	3	1	0	0	0
NaN	NaN	20.1587	21.9736	20.8959	21.398	22.4743	22.3079	21.6944	24.3909	24.1783	24.8421				5	5	5	35.3	35.3	35.3	21.063	0	220.45	67750000	9	0	0	328780	4310500	604790	823640	7804800	1281200	5488000	6401100	13018000	27689000	0	0	0	0	0	0	2	0	0	0	3	4
NaN	NaN	NaN	19.8733	NaN	18.5916	NaN	NaN	NaN	NaN	NaN	NaN				1	1	1	4.3	4.3	4.3	39.666	0	7.6846	1394700	1	0	0	0	1081000	0	313680	0	0	0	0	0	0	0	0	0	1	0	0	0	0	0	0	0	0
[truncated: 4 more columns]

## Sheet: table5
Table 5. Pearson correlation
DMEM_1	DMEM_2	DMEM_3	NUAD_1	NUAD_2	NUAD_3	ZFD_1	ZFD_2	ZFD_3	ZWD_1	ZWD_2	ZWD_3	Group1	Name
#!{Type}E	E	E	E	E	E	E	E	E	E	E	E	C	T
#!{C:Group1}DMEM	DMEM	DMEM	NUAD	NUAD	NUAD	ZFD	ZFD	ZFD	ZWD	ZWD	ZWD
NaN	0.96432	0.958954	0.704352	0.627863	0.748887	0.6456	0.333072	0.717007	0.645635	0.472443	0.592586	DMEM	DMEM_1
0.96432	NaN	0.952035	0.660214	0.548463	0.680243	0.59498	0.274091	0.693956	0.592134	0.402438	0.574578	DMEM	DMEM_2
0.958954	0.952035	NaN	0.716798	0.677668	0.760158	0.689792	0.431163	0.750115	0.678779	0.527471	0.644904	DMEM	DMEM_3
0.704352	0.660214	0.716798	NaN	0.91606	0.908104	0.886847	0.667851	0.884409	0.815554	0.784914	0.867093	NUAD	NUAD_1
0.627863	0.548463	0.677668	0.91606	NaN	0.919462	0.921313	0.733807	0.885167	0.809849	0.869246	0.905745	NUAD	NUAD_2
0.748887	0.680243	0.760158	0.908104	0.919462	NaN	0.893021	0.613487	0.834801	0.768837	0.736574	0.831336	NUAD	NUAD_3
0.6456	0.59498	0.689792	0.886847	0.921313	0.893021	NaN	0.760547	0.937055	0.887683	0.885702	0.952894	ZFD	ZFD_1
0.333072	0.274091	0.431163	0.667851	0.733807	0.613487	0.760547	NaN	0.747329	0.603381	0.822071	0.784447	ZFD	ZFD_2
0.717007	0.693956	0.750115	0.884409	0.885167	0.834801	0.937055	0.747329	NaN	0.843918	0.901338	0.930164	ZFD	ZFD_3
0.645635	0.592134	0.678779	0.815554	0.809849	0.768837	0.887683	0.603381	0.843918	NaN	0.81105	0.887814	ZWD	ZWD_1
0.472443	0.402438	0.527471	0.784914	0.869246	0.736574	0.885702	0.822071	0.901338	0.81105	NaN	0.937968	ZWD	ZWD_2
0.592586	0.574578	0.644904	0.867093	0.905745	0.831336	0.952894	0.784447	0.930164	0.887814	0.937968	NaN	ZWD	ZWD_3

## Sheet: table6
Table 6. Differencial abundant proteins - ANOVA - significance level: 5%
Corrected p-value: Benjamini Hockberg
Posthoc test
DMEM_1	DMEM_2	DMEM_3	NUAD_1	NUAD_2	NUAD_3	ZFD_1	ZFD_2	ZFD_3	ZWD_1	ZWD_2	ZWD_3	ANOVA p value	corrected p-value	Protein IDs	Majority protein IDs	Significant pairs	Fasta headers
DMEM	DMEM	DMEM	NUAD	NUAD	NUAD	ZFD	ZFD	ZFD	ZWD	ZWD	ZWD		Benjamini Hockberg
23.8331	24.5699	24.9815	28.403	29.5335	28.9077	29.7634	30.1278	29.6468	30.7002	31.1303	30.68	5.29486e-07	0.000112781	CON__Q3SX14	CON__Q3SX14	NUAD_DMEM;ZFD_DMEM;ZWD_DMEM;ZWD_NUAD
22.5234	21.6117	23.0573	25.4673	25.4127	25.481	27.2718	26.4332	27.1742	26.3661	26.0615	26.3215	6.73969e-06	0.000717777	P13384	P13384	NUAD_DMEM;ZWD_DMEM;ZFD_DMEM;ZFD_NUAD	sp|P13384|IBP2_BOVIN Insulin-like growth factor-binding protein 2 OS=Bos taurus OX=9913 GN=IGFBP2 PE=1 SV=2
24.6327	24.9502	24.3609	27.6092	28.0164	26.6165	28.3674	27.7096	28.3176	28.6505	28.7177	28.2676	2.1235e-05	0.00150769	Q28085;CON__Q28085	Q28085;CON__Q28085	NUAD_DMEM;ZFD_DMEM;ZWD_DMEM	sp|Q28085|CFAH_BOVIN Complement factor H OS=Bos taurus OX=9913 GN=CFH PE=1 SV=3;
18.0597	18.0319	18.7844	24.3259	26.91	26.2939	26.2247	25.8109	24.2004	23.8506	25.066	25.1524	3.3453e-05	0.00155464	P35445;CON__ENSEMBL:ENSBTAP00000006074	P35445;CON__ENSEMBL:ENSBTAP00000006074	ZWD_DMEM;ZFD_DMEM;NUAD_DMEM	sp|P35445|COMP_BOVIN Cartilage oligomeric matrix protein OS=Bos taurus OX=9913 GN=COMP PE=1 SV=2;
34.7542	34.7506	34.5236	30.9408	30.6516	30.7511	31.1654	30.893	32.4909	32.1387	31.4825	31.5677	3.88089e-05	0.00155464	P02769;CON__P02769	P02769;CON__P02769	DMEM_NUAD;DMEM_ZFD;DMEM_ZWD	sp|P02769|ALBU_BOVIN Albumin OS=Bos taurus OX=9913 GN=ALB PE=1 SV=4;
26.399	25.6295	26.2566	28.8392	28.402	28.3579	27.9577	27.3532	27.5741	28.3138	28.3925	27.9753	4.87527e-05	0.00155464	CON__Q3KUS7;P81187	CON__Q3KUS7;P81187	ZFD_DMEM;ZWD_DMEM;NUAD_DMEM;NUAD_ZFD	;sp|P81187|CFAB_BOVIN Complement factor B OS=Bos taurus OX=9913 GN=CFB PE=1 SV=2
27.4012	27.11	27.7842	29.2169	29.5502	28.1574	30.8823	30.42	30.1322	31.0123	30.7772	30.7551	5.27837e-05	0.00155464	CON__P00761	CON__P00761	NUAD_DMEM;ZFD_DMEM;ZWD_DMEM;ZFD_NUAD;ZWD_NUAD
22.1674	22.8592	21.8981	25.9585	26.9858	26.2935	25.9741	27.332	25.5789	27.8799	27.6751	26.7351	5.83904e-05	0.00155464	CON__Q28194	CON__Q28194	ZFD_DMEM;NUAD_DMEM;ZWD_DMEM
23.8328	23.5922	24.7998	26.2875	26.504	27.2061	28.0477	27.589	27.9224	29.4207	28.0638	27.611	0.000139671	0.00307276	Q2KIS7;CON__Q2KIS7	Q2KIS7;CON__Q2KIS7	NUAD_DMEM;ZFD_DMEM;ZWD_DMEM;ZWD_NUAD	sp|Q2KIS7|TETN_BOVIN Tetranectin OS=Bos taurus OX=9913 GN=CLEC3B PE=2 SV=1;
20.8408	20.4839	20.7375	25.0805	25.2798	24.8695	26.4519	27.1076	24.4912	25.3922	27.4275	26.1798	0.000144261	0.00307276	Q03247;CON__Q03247	Q03247;CON__Q03247	NUAD_DMEM;ZFD_DMEM;ZWD_DMEM	sp|Q03247|APOE_BOVIN Apolipoprotein E OS=Bos taurus OX=9913 GN=APOE PE=1 SV=1;
20.1758	22.0244	20.1981	22.7312	23.3199	21.9443	26.1815	25.407	25.5933	23.8829	25.1995	24.8976	0.000189851	0.00346682	CON__P35908;CON__Q6NXH9;P04262;P04260;Q148H8;CON__Q7RTS7;A7YWK3	CON__P35908	ZWD_DMEM;ZFD_DMEM;ZWD_NUAD;ZFD_NUAD
30.3601	30.1706	30.4401	28.8141	28.2122	28.7237	27.6272	28.0305	28.1939	28.7622	28.477	27.6754	0.000195314	0.00346682	Q7SIH1;CON__ENSEMBL:ENSBTAP00000024146	Q7SIH1;CON__ENSEMBL:ENSBTAP00000024146	DMEM_ZFD;DMEM_ZWD;DMEM_NUAD	sp|Q7SIH1|A2MG_BOVIN Alpha-2-macroglobulin OS=Bos taurus OX=9913 GN=A2M PE=1 SV=2;
22.1099	19.8957	23.272	26.1833	27.9584	27.1536	29.4889	29.0123	28.0099	28.9193	29.7644	27.3822	0.000276779	0.00453491	CON__ENSEMBL:ENSBTAP00000032840	CON__ENSEMBL:ENSBTAP00000032840	NUAD_DMEM;ZWD_DMEM;ZFD_DMEM
NaN	NaN	20.1587	21.9736	20.8959	21.398	22.4743	22.3079	21.6944	24.3909	24.1783	24.8421	0.000348551	0.00530296	Q8SPP7	Q8SPP7	ZFD_DMEM;ZFD_NUAD	sp|Q8SPP7|PGRP1_BOVIN Peptidoglycan recognition protein 1 OS=Bos taurus OX=9913 GN=PGLYRP1 PE=1 SV=1
22.1886	22.2896	22.2102	24.7955	25.9817	24.2528	24.0972	24.1983	23.8693	26.2552	25.3735	25.0098	0.000388712	0.00551971	Q9N2I2;CON__Q9N2I2	Q9N2I2;CON__Q9N2I2	ZFD_DMEM;NUAD_DMEM;ZWD_DMEM;ZWD_ZFD	sp|Q9N2I2|IPSP_BOVIN Plasma serine protease inhibitor OS=Bos taurus OX=9913 GN=SERPINA5 PE=1 SV=1;
26.9351	27.6662	27.5529	29.9083	29.5283	28.9219	30.9537	29.7823	30.2454	31.3311	29.6673	30.3479	0.000848991	0.0113022	CON__ENSEMBL:ENSBTAP00000007350	CON__ENSEMBL:ENSBTAP00000007350	NUAD_DMEM;ZFD_DMEM;ZWD_DMEM
20.0332	21.9355	22.0965	24.3949	25.0898	22.2851	27.4515	24.864	26.3152	29.0061	27.2397	27.0535	0.00122831	0.0140148	CON__P04264;CON__Q6IFZ6;CON__H-INV:HIT000016045;CON__Q7Z794;CON__Q9H552;CON__Q9R0H5	CON__P04264	ZFD_DMEM;ZWD_DMEM;ZWD_NUAD
29.4829	29.5315	29.2875	27.8748	24.6836	28.5935	25.3035	23.438	25.9201	23.6309	22.6196	21.7914	0.00129546	0.0140148	Q58D62;CON__Q58D62	Q58D62;CON__Q58D62	NUAD_ZWD;DMEM_ZWD;DMEM_ZFD	sp|Q58D62|FETUB_BOVIN Fetuin-B OS=Bos taurus OX=9913 GN=FETUB PE=1 SV=1;
28.4497	28.745	28.9497	25.604	24.4478	25.4149	24.2376	23.3265	26.3466	22.7979	23.7837	24.7988	0.00129799	0.0140148	Q3MHN5;CON__Q3MHN5	Q3MHN5;CON__Q3MHN5	DMEM_ZWD;DMEM_ZFD;DMEM_NUAD	sp|Q3MHN5|VTDB_BOVIN Vitamin D-binding protein OS=Bos taurus OX=9913 GN=GC PE=2 SV=1;
19.8216	18.9543	21.6342	23.6772	26.08	25.0866	24.762	26.6954	24.9026	24.5921	26.4178	24.9983	0.00131594	0.0140148	P07589	P07589	NUAD_DMEM;ZWD_DMEM;ZFD_DMEM	sp|P07589|FINC_BOVIN Fibronectin OS=Bos taurus OX=9913 GN=FN1 PE=1 SV=4
27.1882	27.0845	28.2597	24.8258	24.7148	25.8827	24.0393	23.1092	25.0982	21.63	23.52	23.7524	0.0014495	0.0147021	Q3SZV7;CON__Q3SZV7	Q3SZV7;CON__Q3SZV7	DMEM_ZWD;DMEM_ZFD;DMEM_NUAD	sp|Q3SZV7|HEMO_BOVIN Hemopexin OS=Bos taurus OX=9913 GN=HPX PE=2 SV=1;
21.6916	21.2496	23.314	25.3774	25.8354	24.8065	24.194	23.2073	23.1765	24.9452	25.8966	24.8115	0.00172348	0.0166864	Q29RQ1;CON__Q29RQ1	Q29RQ1;CON__Q29RQ1	ZWD_DMEM;NUAD_DMEM	sp|Q29RQ1|CO7_BOVIN Complement component C7 OS=Bos taurus OX=9913 GN=C7 PE=2 SV=1;
29.3656	29.7114	29.4293	31.874	31.5045	31.3479	29.8776	28.7751	29.7632	30.3482	29.0264	29.891	0.00183989	0.017039	Q2UVX4;CON__Q2UVX4	Q2UVX4;CON__Q2UVX4	NUAD_ZFD;NUAD_DMEM;NUAD_ZWD	sp|Q2UVX4|CO3_BOVIN Complement C3 OS=Bos taurus OX=9913 GN=C3 PE=1 SV=2;
22.0937	21.659	21.8328	21.0874	21.1023	20.8198	21.6226	21.6618	20.5335	26.307	23.8175	23.5991	0.00268366	0.0238175	CON__ENSEMBL:ENSBTAP00000024462	CON__ENSEMBL:ENSBTAP00000024462	ZWD_NUAD;ZWD_ZFD;ZWD_DMEM
26.1554	26.0419	25.1781	23.6782	23.9514	23.2847	24.0719	23.6313	23.2771	22.0203	23.34	23.9127	0.00291618	0.0248459	P28800;CON__P28800	P28800;CON__P28800	DMEM_ZWD;DMEM_NUAD;DMEM_ZFD	sp|P28800|A2AP_BOVIN Alpha-2-antiplasmin OS=Bos taurus OX=9913 GN=SERPINF2 PE=1 SV=2;
20.2516	19.7558	20.3688	NaN	19.7728	NaN	20.5064	21.4545	20.339	22.3289	22.5277	21.7887	0.00347953	0.026257	Q3T0A3	Q3T0A3	ZFD_DMEM;ZFD_NUAD	sp|Q3T0A3|CFAD_BOVIN Complement factor D OS=Bos taurus OX=9913 GN=CFD PE=2 SV=1
21.7529	21.884	22.0716	26.142	26.7488	26.8383	25.918	23.3554	25.2555	23.1207	24.9042	26.0821	0.00349131	0.026257	CON__Q32PI4	CON__Q32PI4	ZWD_DMEM;ZFD_DMEM;NUAD_DMEM
24.6066	25.1581	26.3477	23.8	25.1374	26.0606	29.5905	28.2954	28.1168	26.7242	28.1071	28.4961	0.00350013	0.026257	CON__P02768-1	CON__P02768-1	ZWD_NUAD;ZFD_NUAD;ZFD_DMEM
22.2179	23.4559	22.1822	25.6655	26.4612	26.4127	24.351	23.1514	25.1679	23.3814	24.8667	24.6024	0.00358506	0.026257	P02676;CON__P02676	P02676;CON__P02676	NUAD_DMEM	sp|P02676|FIBB_BOVIN Fibrinogen beta chain OS=Bos taurus OX=9913 GN=FGB PE=1 SV=2;
31.9959	31.6711	31.7995	28.7422	29.0844	30.5481	28.4514	28.0744	30.2655	28.6473	28.1737	28.8538	0.00369816	0.026257	P34955;CON__P34955	P34955;CON__P34955	DMEM_ZWD;DMEM_ZFD;DMEM_NUAD	sp|P34955|A1AT_BOVIN Alpha-1-antiproteinase OS=Bos taurus OX=9913 GN=SERPINA1 PE=1 SV=1;
26.5246	26.22	26.6724	27.5011	27.8708	28.2862	26.5866	25.3845	26.5203	26.4439	26.1408	26.5841	0.00404267	0.027777	Q3T052;CON__Q3T052	Q3T052;CON__Q3T052	NUAD_ZFD;NUAD_ZWD;NUAD_DMEM	sp|Q3T052|ITIH4_BOVIN Inter-alpha-trypsin inhibitor heavy chain H4 OS=Bos taurus OX=9913 GN=ITIH4 PE=1 SV=1;
30.8955	31.5722	32.1921	29.1677	27.6719	28.6672	29.7979	28.4905	29.9241	30.411	29.3497	29.6287	0.0041869	0.027869	P12763;CON__P12763	P12763;CON__P12763	DMEM_NUAD;DMEM_ZFD	sp|P12763|FETUA_BOVIN Alpha-2-HS-glycoprotein OS=Bos taurus OX=9913 GN=AHSG PE=1 SV=2;
NaN	21.9891	21.4515	24.053	24.2569	25.4751	24.067	23.6941	24.215	24.5706	23.3538	24.0041	0.0045032	0.0290547	P12799	P12799	ZWD_DMEM;ZFD_DMEM;NUAD_DMEM	sp|P12799|FIBG_BOVIN Fibrinogen gamma-B chain OS=Bos taurus OX=9913 GN=FGG PE=1 SV=1
NaN	24.7834	24.5666	22.6531	22.8069	NaN	23.0446	NaN	NaN	NaN	23.1248	NaN	0.00463785	0.0290547	P51186	P51186	DMEM_NUAD	sp|P51186|CAN3_BOVIN Calpain-3 OS=Bos taurus OX=9913 GN=CAPN3 PE=2 SV=2
21.1096	21.8456	20.7515	24.1814	24.4123	23.8836	25.5138	22.9952	25.0565	24.685	23.5641	25.6465	0.00505446	0.03076	CON__P01030	CON__P01030	NUAD_DMEM;ZFD_DMEM;ZWD_DMEM
28.1298	28.0202	27.5721	28.2966	27.8254	28.4827	26.841	24.3196	26.2911	25.8907	24.639	25.9691	0.00554788	0.032825	CON__Q9TRI1	CON__Q9TRI1	DMEM_ZWD;NUAD_ZWD;DMEM_ZFD;NUAD_ZFD
21.683	24.2624	23.4184	24.1905	25.5125	23.8975	27.9227	26.4135	26.4903	25.2864	26.8187	26.6555	0.00580078	0.0333937	CON__P13645;P06394;CON__P02535-1;CON__P05784;Q148H6;CON__Q148H6;CON__Q7Z3Y7;Q0P5J4;CON__Q7Z3Z0;CON__Q7Z3Y8;Q0P5J6;CON__Q7Z3Y9;CON__Q2M2I5	CON__P13645	ZWD_DMEM;ZFD_DMEM
21.0037	21.2955	21.3312	23.388	23.8485	23.7851	22.5797	23.3012	22.7968	20.8334	22.5158	23.046	0.00718837	0.0402927	Q32PJ2;CON__Q32PJ2	Q32PJ2;CON__Q32PJ2	ZFD_DMEM;NUAD_DMEM	sp|Q32PJ2|APOA4_BOVIN Apolipoprotein A-IV OS=Bos taurus OX=9913 GN=APOA4 PE=2 SV=1;
NaN	18.9436	19.6185	21.774	23.5055	23.0066	25.0725	25.2678	24.1972	19.7879	23.3744	22.5421	0.00741566	0.0405009	Q5E9Z2	Q5E9Z2	ZFD_DMEM	sp|Q5E9Z2|HABP2_BOVIN Hyaluronan-binding protein 2 OS=Bos taurus OX=9913 GN=HABP2 PE=2 SV=1
20.1084	19.8226	NaN	21.9916	21.8132	22.3913	22.0649	NaN	NaN	19.7175	NaN	20.7155	0.00916269	0.0487913	P02453;CON__Q862S4	P02453	NUAD_DMEM;NUAD_ZFD	sp|P02453|CO1A1_BOVIN Collagen alpha-1(I) chain OS=Bos taurus OX=9913 GN=COL1A1 PE=1 SV=3
18.553	20.0776	NaN	22.0052	24.208	23.8369	22.6905	23.2708	21.6848	20.6805	21.6294	21.8089	0.00983725	0.0511057	CON__Q2KIH2	CON__Q2KIH2	ZFD_DMEM;NUAD_DMEM
22.4028	23.8319	24.113	26.1705	26.1944	26.7694	25.8141	26.2815	24.9635	22.7052	24.8469	24.9686	0.0116702	0.0584316	P00735;CON__P00735	P00735;CON__P00735	NUAD_DMEM	sp|P00735|THRB_BOVIN Prothrombin OS=Bos taurus OX=9913 GN=F2 PE=1 SV=2;
23.2186	24.1709	24.3859	25.8064	25.2837	26.1444	25.7695	24.6884	25.5049	25.2248	24.9944	25.8147	0.0120259	0.0584316	P50448;CON__P50448	P50448;CON__P50448	ZFD_DMEM;ZWD_DMEM;NUAD_DMEM	sp|P50448|F12AI_BOVIN Factor XIIa inhibitor OS=Bos taurus OX=9913 PE=1 SV=1;
17.1846	17.2188	17.3465	19.5693	19.4682	21.2005	21.2463	NaN	19.5233	NaN	18.7524	NaN	0.0120704	0.0584316	Q5NTB3	Q5NTB3	NUAD_DMEM;ZFD_DMEM	sp|Q5NTB3|FA11_BOVIN Coagulation factor XI OS=Bos taurus OX=9913 GN=F11 PE=1 SV=1
22.2155	23.1498	23.174	26.0523	25.574	23.1808	21.5717	23.3266	22.4379	20.0776	20.5297	22.1807	0.0124451	0.0587711	P81644;CON__P81644	P81644;CON__P81644	NUAD_ZWD	sp|P81644|APOA2_BOVIN Apolipoprotein A-II OS=Bos taurus OX=9913 GN=APOA2 PE=1 SV=2;
26.8466	26.29	26.7804	24.0012	24.6794	25.7568	23.8008	24.0178	26.3479	22.1626	22.8217	24.0434	0.0126924	0.0587711	Q9TTE1;CON__Q9TTE1	Q9TTE1;CON__Q9TTE1	DMEM_ZWD	sp|Q9TTE1|SPA31_BOVIN Serpin A3-1 OS=Bos taurus OX=9913 GN=SERPINA3-1 PE=1 SV=3;
21.7045	20.5166	20.7787	24.8267	25.7893	23.8987	24.3113	26.0978	24.7168	22.1384	26.0777	25.2149	0.0138026	0.0615116	Q28107;CON__Q28107	Q28107;CON__Q28107	ZWD_DMEM;NUAD_DMEM;ZFD_DMEM	sp|Q28107|FA5_BOVIN Coagulation factor V OS=Bos taurus OX=9913 GN=F5 PE=1 SV=1;
NaN	NaN	21.0031	22.2859	NaN	22.2595	21.1674	NaN	20.8694	NaN	NaN	21.6474	0.0139233	0.0615116	CON__Q3MHH8	CON__Q3MHH8	DMEM_NUAD
23.7313	22.1068	23.793	26.0869	25.1673	26.6562	25.6634	24.7539	24.9866	26.5949	25.1752	24.7556	0.0141505	0.0615116	CON__ENSEMBL:ENSBTAP00000018574	CON__ENSEMBL:ENSBTAP00000018574	ZWD_DMEM;NUAD_DMEM
25.6445	26.3714	25.4407	27.1822	27.5243	28.2353	26.9932	25.7879	26.5796	26.6573	26.5284	27.3489	0.0161319	0.0687221	P06868;CON__P06868	P06868;CON__P06868	NUAD_DMEM	sp|P06868|PLMN_BOVIN Plasminogen OS=Bos taurus OX=9913 GN=PLG PE=1 SV=2;
21.6645	22.8342	22.6272	21.3981	21.0896	21.6427	21.4978	23.4737	23.6447	23.5777	24.1564	23.7599	0.0164935	0.0688848	P01044;CON__P01044-1;P01044-2	P01044;CON__P01044-1;P01044-2	ZWD_NUAD	sp|P01044|KNG1_BOVIN Kininogen-1 OS=Bos taurus OX=9913 GN=KNG1 PE=1 SV=1;;sp|P01044-2|KNG1_BOVIN Isoform LMW of Kininogen-1 OS=Bos taurus OX=9913 GN=KNG1
24.3181	25.259	24.0816	22.7477	23.6296	23.301	23.9772	24.9306	25.5578	24.6916	26.4769	25.9648	0.0179752	0.0734513	P01045;CON__P01045-1;P01045-2	P01045;CON__P01045-1;P01045-2	ZWD_NUAD	sp|P01045|KNG2_BOVIN Kininogen-2 OS=Bos taurus OX=9913 GN=KNG2 PE=1 SV=1;;sp|P01045-2|KNG2_BOVIN Isoform LMW of Kininogen-2 OS=Bos taurus OX=9913 GN=KNG2
NaN	17.3015	NaN	23.2455	25.2059	23.047	25.5989	25.9918	25.3485	28.2217	26.3321	26.3941	0.0182766	0.0734513	CON__P35527	CON__P35527	ZFD_DMEM
24.2969	24.7866	NaN	24.5956	24.9656	23.9482	23.7286	23.7493	23.8476	23.6372	22.6554	23.3934	0.0199648	0.0778876	Q3MHN2;CON__Q3MHN2	Q3MHN2;CON__Q3MHN2	NUAD_ZWD;DMEM_ZWD	sp|Q3MHN2|CO9_BOVIN Complement component C9 OS=Bos taurus OX=9913 GN=C9 PE=2 SV=1;
30.5358	31.4294	30.8265	23.0401	20.3119	21.736	22.9604	16.932	27.1226	27.0879	21.3801	23.0843	0.0203024	0.0778876	CON__Q29443;Q29443;CON__Q0IIK2	CON__Q29443;Q29443;CON__Q0IIK2	DMEM_NUAD;DMEM_ZFD	;sp|Q29443|TRFE_BOVIN Serotransferrin OS=Bos taurus OX=9913 GN=TF PE=2 SV=1;
23.8718	24.4676	23.9371	26.7897	27.5533	25.0743	25.3583	27.2337	25.4238	27.6399	27.9738	26.185	0.0208017	0.0778876	Q95121;CON__Q95121	Q95121;CON__Q95121	ZWD_DMEM	sp|Q95121|PEDF_BOVINc OS=Bos taurus OX=9913 GN=SERPINF1 PE=1 SV=1;
21.5364	NaN	NaN	21.7043	20.7345	NaN	24.5709	24.3733	23.1399	NaN	23.6847	24.3535	0.0208432	0.0778876	Q03763	Q03763	ZFD_DMEM;NUAD_DMEM	sp|Q03763|DSG1_BOVIN Desmoglein-1 OS=Bos taurus OX=9913 GN=DSG1 PE=1 SV=1
NaN	NaN	NaN	18.5354	19.0487	NaN	19.8402	19.7225	19.7838	NaN	19.6988	20.2505	0.0219771	0.080709	P53712	P53712	NUAD_DMEM;ZFD_DMEM	sp|P53712|ITB1_BOVIN Integrin beta-1 OS=Bos taurus OX=9913 GN=ITGB1 PE=1 SV=3
23.4769	23.5992	22.893	24.5065	24.9807	25.7022	23.3325	23.4419	23.6259	22.1476	24.0498	23.7298	0.0233598	0.0839733	CON__ENSEMBL:ENSBTAP00000016046	CON__ENSEMBL:ENSBTAP00000016046	NUAD_ZWD;NUAD_DMEM
26.2746	26.388	26.4684	25.7121	26.5662	25.8635	22.5551	25.2759	23.7801	NaN	25.3429	24.5567	0.0236545	0.0839733	P68103;Q32PH8	P68103;Q32PH8	NUAD_ZFD;DMEM_ZFD	sp|P68103|EF1A1_BOVIN Elongation factor 1-alpha 1 OS=Bos taurus OX=9913 GN=EEF1A1 PE=1 SV=1;sp|Q32PH8|EF1A2_BOVIN Elongation factor 1-alpha 2 OS=Bos taurus OX=9913 GN=EEF1A2 PE=2 SV=1
18.0719	19.5971	19.336	22.0376	22.6186	21.2221	24.3645	23.7489	25.0861	20.0028	26.2615	26.3733	0.0289929	0.101238	P33433	P33433	ZWD_DMEM;ZFD_DMEM	sp|P33433|HRG_BOVIN Histidine-rich glycoprotein (Fragment) OS=Bos taurus OX=9913 GN=HRG PE=1 SV=1
22.7822	24.0956	24.9129	21.4181	NaN	21.407	21.1799	NaN	21.4692	23.0431	NaN	NaN	0.0298837	0.102665	CON__A2I7N3;A2I7N3	CON__A2I7N3;A2I7N3	DMEM_ZFD;DMEM_NUAD	;sp|A2I7N3|SPA37_BOVIN Serpin A3-7 OS=Bos taurus OX=9913 GN=SERPINA3-7 PE=3 SV=1
NaN	NaN	NaN	22.6599	NaN	22.2681	23.6261	22.3516	23.5711	24.1817	23.9567	24.2678	0.0311885	0.105447	CON__P02777	CON__P02777	ZFD_DMEM
NaN	19.9797	19.9784	20.0816	21.3226	19.7355	21.5609	25.7666	23.7492	22.4392	23.9725	22.274	0.0329924	0.109803	CON__P13647	CON__P13647
22.0931	21.6082	20.2823	25.0945	25.4844	24.87	23.5036	25.4694	24.7239	21.2252	25.4516	25.3022	0.040885	0.133977	Q2KJ63	Q2KJ63	NUAD_DMEM	sp|Q2KJ63|KLKB1_BOVIN Plasma kallikrein OS=Bos taurus OX=9913 GN=KLKB1 PE=2 SV=1
NaN	NaN	NaN	NaN	19.5491	19.9799	NaN	18.7996	19.5677	NaN	18.1604	18.0465	0.0425194	0.135322	A6QQF6	A6QQF6	DMEM_ZFD	sp|A6QQF6|SBSN_BOVIN Suprabasin OS=Bos taurus OX=9913 GN=SBSN PE=2 SV=1
23.9049	23.5956	24.6408	25.0126	25.5366	25.8917	24.7359	26.0135	24.4191	23.6006	24.3196	24.394	0.0425661	0.135322	P02672;CON__P02672	P02672;CON__P02672		sp|P02672|FIBA_BOVIN Fibrinogen alpha chain OS=Bos taurus OX=9913 GN=FGA PE=1 SV=5;
21.637	NaN	NaN	24.1492	23.3632	23.4555	21.8609	22.7715	21.8697	21.4391	22.933	22.6299	0.0434481	0.136095	P10096	P10096		sp|P10096|G3P_BOVIN Glyceraldehyde-3-phosphate dehydrogenase OS=Bos taurus OX=9913 GN=GAPDH PE=1 SV=4
NaN	22.3725	22.8523	24.946	21.7787	23.8681	21.6946	19.6792	21.0096	21.5661	20.5562	20.1002	0.0450169	0.138965	P17697;CON__P17697	P17697;CON__P17697		sp|P17697|CLUS_BOVIN Clusterin OS=Bos taurus OX=9913 GN=CLU PE=1 SV=1;
21.0712	21.3047	21.3057	22.1904	NaN	21.4998	21.0449	NaN	21.1486	20.6367	NaN	20.9776	0.046052	0.14013	Q95M17;CON__Q95M17	Q95M17;CON__Q95M17	NUAD_ZWD	sp|Q95M17|CHIA_BOVIN Acidic mammalian chitinase OS=Bos taurus OX=9913 GN=CHIA PE=1 SV=1;
24.826	24.0182	23.6136	23.1491	21.8911	24.5189	21.0802	NaN	21.5735	NaN	NaN	20.0624	0.0537426	0.161228	G3MYZ3;CON__REFSEQ:XP_585019	G3MYZ3;CON__REFSEQ:XP_585019	DMEM_ZFD	sp|G3MYZ3|AFAM_BOVIN Afamin OS=Bos taurus OX=9913 GN=AFM PE=1 SV=1;
24.1159	24.806	23.3551	22.8937	21.5603	22.4835	22.2835	NaN	21.9788	23.5117	21.5304	22.173	0.0579284	0.171372	Q2KJF1;CON__Q2KJF1	Q2KJF1;CON__Q2KJF1		sp|Q2KJF1|A1BG_BOVIN Alpha-1B-glycoprotein OS=Bos taurus OX=9913 GN=A1BG PE=1 SV=1;
26.2185	25.4707	24.4359	21.5946	NaN	23.8198	21.7921	NaN	22.6498	NaN	21.4764	23.4209	0.068505	0.19789	O46375	O46375		sp|O46375|TTHY_BOVIN Transthyretin OS=Bos taurus OX=9913 GN=TTR PE=1 SV=1
26.2933	26.4442	26.8971	25.0068	27.4344	26.4786	27.1959	28.5064	28.0579	26.9122	29.6794	29.6781	0.0687506	0.19789	CON__Q2KJ62	CON__Q2KJ62
24.1729	23.9032	22.1781	25.7348	25.9544	25.5043	25.4994	23.7463	23.3166	25.0167	23.1789	24.1427	0.0757706	0.215189	CON__Q1A7A4;P12082	CON__Q1A7A4
NaN	NaN	NaN	20.5604	NaN	19.6064	20.6912	20.7983	21.0869	21.0172	21.541	20.8728	0.0788425	0.21818	P07456	P07456		sp|P07456|IGF2_BOVIN Insulin-like growth factor II OS=Bos taurus OX=9913 GN=IGF2 PE=1 SV=4
22.4986	23.8319	23.9599	21.6527	22.2124	NaN	22.0654	NaN	22.368	NaN	22.0425	22.0674	0.0788725	0.21818	P18902	P18902		sp|P18902|RET4_BOVIN Retinol-binding protein 4 OS=Bos taurus OX=9913 GN=RBP4 PE=1 SV=1
22.2722	23.0127	23.9283	25.6048	23.4028	24.7685	NaN	30.4915	25.6709	23.4807	26.6664	26.0054	0.0810758	0.221399	CON__Q14525;Q0P5J7;CON__Q497I4;A7YWM2;CON__Q6IFU5	CON__Q14525
29.3651	29.4319	28.6982	27.7155	25.6819	28.6021	26.7266	23.062	26.8341	27.6713	24.1357	26.0382	0.0854847	0.230484	Q3SZ57;CON__Q3SZ57	Q3SZ57;CON__Q3SZ57		sp|Q3SZ57|FETA_BOVIN Alpha-fetoprotein OS=Bos taurus OX=9913 GN=AFP PE=2 SV=1;
24.2864	25.0329	21.3203	19.2034	20.056	18.9485	21.1034	27.1101	22.6231	21.7916	20.8123	22.8171	0.0868698	0.231291	CON__P02533;CON__Q04695;CON__Q9QWL7;A1L595;CON__Q6IFX2;CON__A2A4G1;CON__P08727;CON__P19001;CON__P19012;P05785;CON__Q61782;CON__P08730-1;CON__Q9Z2K1;CON__Q3ZAW8	CON__P02533;CON__Q04695;CON__Q9QWL7;A1L595		;;;sp|A1L595|K1C17_BOVIN Keratin, type I cytoskeletal 17 OS=Bos taurus OX=9913 GN=KRT17 PE=2 SV=1
18.436	18.3778	17.9938	17.5234	NaN	18.7059	19.3225	18.8499	19.7618	18.6972	NaN	19.4107	0.0887105	0.233276	CON__P04258;P04258	CON__P04258
NaN	NaN	NaN	NaN	NaN	NaN	22.3396	22.789	NaN	20.9512	21.8529	21.839	0.0940887	0.244401	P15467	P15467		sp|P15467|RNAS4_BOVIN Ribonuclease 4 OS=Bos taurus OX=9913 GN=RNASE4 PE=1 SV=5
21.4715	21.5291	NaN	22.5478	21.8087	22.1323	21.4255	22.4676	21.5601	19.8629	NaN	21.2836	0.0972983	0.249693	Q5E9B1;P19858	Q5E9B1		sp|Q5E9B1|LDHB_BOVIN L-lactate dehydrogenase B chain OS=Bos taurus OX=9913 GN=LDHB PE=2 SV=4
22.0068	22.3717	21.8147	20.9327	21.9132	20.5596	21.7303	NaN	21.6807	21.7133	22.6919	23.4658	0.102646	0.258769	CON__ENSEMBL:ENSBTAP00000014147	CON__ENSEMBL:ENSBTAP00000014147
22.9253	23.2451	22.797	23.8414	24.5404	24.1157	24.3295	24.6126	23.2244	23.3176	25.839	25.8081	0.103265	0.258769	CON__Q1RMN8	CON__Q1RMN8
24.7543	23.9852	25.413	27.8531	25.8914	27.0711	27.9074	24.5585	26.4269	24.905	23.7496	25.7348	0.11055	0.273805	P63258;P60712;Q3ZC07;P68138;Q5E9B5;P62739	P63258;P60712;Q3ZC07;P68138;Q5E9B5;P62739		sp|P63258|ACTG_BOVIN Actin, cytoplasmic 2 OS=Bos taurus OX=9913 GN=ACTG1 PE=1 SV=1;sp|P60712|ACTB_BOVIN Actin, cytoplasmic 1 OS=Bos taurus OX=9913 GN=ACTB PE=1 SV=1;sp|Q3ZC07|ACTC_BOVIN Actin, alpha cardiac muscle 1 OS=Bos taurus OX=9913 GN=ACTC1 PE=2 SV=1
NaN	NaN	NaN	21.2234	23.1075	21.1242	21.071	20.2856	19.8439	21.4377	21.55	21.8945	0.11602	0.283691	P02459	P02459		sp|P02459|CO2A1_BOVIN Collagen alpha-1(II) chain OS=Bos taurus OX=9913 GN=COL2A1 PE=1 SV=4
28.435	27.2533	29.2173	31.0194	30.0775	29.5273	30.8348	29.5799	30.1521	31.4885	28.8948	29.5524	0.117206	0.283691	P15497;CON__P15497	P15497;CON__P15497		sp|P15497|APOA1_BOVIN Apolipoprotein A-I OS=Bos taurus OX=9913 GN=APOA1 PE=1 SV=3;
18.9357	18.9902	18.5981	21.401	18.8305	21.1823	NaN	NaN	NaN	NaN	NaN	18.9396	0.121656	0.291153	Q05443;CON__Q05443	Q05443;CON__Q05443		sp|Q05443|LUM_BOVIN Lumican OS=Bos taurus OX=9913 GN=LUM PE=1 SV=1;
NaN	NaN	NaN	23.8156	25.6693	25.6648	25.8802	25.7155	24.8104	26.6168	26.1362	26.4801	0.134989	0.317073	P98140	P98140		sp|P98140|FA12_BOVIN Coagulation factor XII OS=Bos taurus OX=9913 GN=F12 PE=1 SV=2
20.4311	19.6279	19.8003	NaN	NaN	NaN	18.8428	NaN	19.471	20.5563	NaN	NaN	0.135623	0.317073	CON__ENSEMBL:ENSBTAP00000018229	CON__ENSEMBL:ENSBTAP00000018229
22.4541	24.03	23.9379	21.5354	NaN	23.3853	21.2219	NaN	22.2277	20.7216	22.384	21.1507	0.136952	0.317073	Q3Y5Z3;CON__Q3Y5Z3	Q3Y5Z3;CON__Q3Y5Z3		sp|Q3Y5Z3|ADIPO_BOVIN Adiponectin OS=Bos taurus OX=9913 GN=ADIPOQ PE=1 SV=1;
23.9932	23.8249	23.6177	26.4134	24.0978	24.561	23.9562	NaN	23.7428	22.0953	22.1449	24.4386	0.153766	0.350194	P02070;CON__P02070	P02070;CON__P02070		sp|P02070|HBB_BOVIN Hemoglobin subunit beta OS=Bos taurus OX=9913 GN=HBB PE=1 SV=1;
NaN	NaN	NaN	20.3333	21.9281	22.1679	22.4013	22.9908	22.7043	22.7696	21.8962	21.9707	0.154546	0.350194	Q2KIV9	Q2KIV9		sp|Q2KIV9|C1QB_BOVIN Complement C1q subcomponent subunit B OS=Bos taurus OX=9913 GN=C1QB PE=1 SV=1
NaN	NaN	NaN	23.0464	24.7851	22.4027	25.6583	24.6737	NaN	NaN	NaN	23.6942	0.174189	0.39055	Q58CZ2	Q58CZ2		sp|Q58CZ2|PCMD2_BOVIN Protein-L-isoaspartate O-methyltransferase domain-containing protein 2 OS=Bos taurus OX=9913 GN=PCMTD2 PE=2 SV=1
NaN	NaN	NaN	16.2335	17.0272	17.6143	17.5357	18.3127	17.4242	NaN	NaN	NaN	0.176816	0.392311	Q3ZBZ8	Q3ZBZ8		sp|Q3ZBZ8|STIP1_BOVIN Stress-induced-phosphoprotein 1 OS=Bos taurus OX=9913 GN=STIP1 PE=2 SV=1
NaN	NaN	NaN	NaN	15.3348	15.5781	16.5363	16.1918	16.2049	NaN	15.4298	16.4699	0.180183	0.393555	P24591	P24591		sp|P24591|IBP1_BOVIN Insulin-like growth factor-binding protein 1 OS=Bos taurus OX=9913 GN=IGFBP1 PE=2 SV=2
13.8725	NaN	NaN	14.7099	15.2555	16.9808	17.6332	NaN	16.1006	NaN	17.6007	17.8668	0.181072	0.393555	P13135	P13135		sp|P13135|CPNS1_BOVIN Calpain small subunit 1 OS=Bos taurus OX=9913 GN=CAPNS1 PE=2 SV=1
22.2318	19.2934	21.4067	23.5938	NaN	22.4498	20.3086	NaN	20.6794	21.1667	NaN	21.2958	0.189728	0.408202	Q9TT36;CON__Q9TT36	Q9TT36;CON__Q9TT36		sp|Q9TT36|THBG_BOVIN Thyroxine-binding globulin OS=Bos taurus OX=9913 GN=SERPINA7 PE=2 SV=1;
15.3878	14.6331	NaN	NaN	NaN	NaN	17.985	NaN	15.8667	NaN	16.8341	18.3342	0.196638	0.418839	P68301;P67983;P58280;P55943;P55942;CON__P67983	P68301;P67983;P58280;P55943;P55942;CON__P67983		sp|P68301|MT2_BOVIN Metallothionein-2 OS=Bos taurus OX=9913 GN=MT2A PE=1 SV=1;sp|P67983|MT1A_BOVIN Metallothionein-1A OS=Bos taurus OX=9913 GN=MT1A PE=1 SV=1;sp|P58280|MT1_BOVIN Metallothionein-1 OS=Bos taurus OX=9913 GN=MT1 PE=1 SV=1;sp|P55943|MT2H_BOVIN
28.8457	28.1036	27.6928	31.2512	28.6054	29.4674	29.8632	28.9371	29.5335	29.3957	28.4179	29.5781	0.199799	0.421358	P01966;CON__P01966	P01966;CON__P01966		sp|P01966|HBA_BOVIN Hemoglobin subunit alpha OS=Bos taurus OX=9913 GN=HBA PE=1 SV=2;
NaN	NaN	NaN	17.2721	17.9965	18.902	20.194	20.041	20.2367	17.5932	20.93	22.4311	0.203079	0.424078	Q05718	Q05718		sp|Q05718|IBP6_BOVIN Insulin-like growth factor-binding protein 6 OS=Bos taurus OX=9913 GN=IGFBP6 PE=2 SV=2
22.8289	22.4931	23.2045	24.5529	25.3832	22.4884	23.5916	24.8923	23.8417	24.7052	24.6184	23.7049	0.224875	0.460853	CON__Q3ZBS7	CON__Q3ZBS7
23.7408	23.0988	24.1055	20.2744	22.2355	23.0922	21.2639	22.8642	22.6386	20.0967	22.7834	22.2956	0.225017	0.460853	P23805;P42916	P23805		sp|P23805|CONG_BOVIN Conglutinin OS=Bos taurus OX=9913 GN=CGN1 PE=1 SV=2
NaN	NaN	21.7038	21.0367	NaN	NaN	20.9193	NaN	20.7558	21.3265	20.9206	21.0156	0.236846	0.480459	Q28065;CON__Q28065	Q28065;CON__Q28065		sp|Q28065|C4BPA_BOVIN C4b-binding protein alpha chain OS=Bos taurus OX=9913 GN=C4BPA PE=2 SV=1;
17.1832	NaN	16.6644	NaN	NaN	NaN	17.467	19.0386	NaN	NaN	NaN	NaN	0.249508	0.50137	P13608-2;P13608	P13608-2;P13608		sp|P13608-2|PGCA_BOVIN Isoform 2 of Aggrecan core protein OS=Bos taurus OX=9913 GN=ACAN;sp|P13608|PGCA_BOVIN Aggrecan core protein OS=Bos taurus OX=9913 GN=ACAN PE=1 SV=3
NaN	NaN	NaN	18.9707	17.8553	17.0165	17.9348	29.5301	23.5412	17.0936	23.3964	18.8412	0.25991	0.517391	CON__P78386;CON__Q9NSB4	CON__P78386
NaN	NaN	NaN	NaN	NaN	NaN	18.439	18.4835	18.1443	NaN	18.7252	18.4439	0.277086	0.546475	P98133	P98133		sp|P98133|FBN1_BOVIN Fibrillin-1 OS=Bos taurus OX=9913 GN=FBN1 PE=1 SV=2
22.825	NaN	20.1899	24.2584	NaN	22.6296	22.6865	NaN	22.3113	21.2616	NaN	20.9258	0.286704	0.560256	CON__Q2KIF2	CON__Q2KIF2
NaN	NaN	NaN	18.2995	17.8493	20.3477	19.03	24.8401	NaN	17.9252	19.1756	19.8038	0.298424	0.577858	Q5E9F8;A5PK61;Q3SZB8;P84227;P68432	Q5E9F8;A5PK61;Q3SZB8;P84227;P68432		sp|Q5E9F8|H33_BOVIN Histone H3.3 OS=Bos taurus OX=9913 GN=H3-3B PE=1 SV=3;sp|A5PK61|H3C_BOVIN Histone H3.3C OS=Bos taurus OX=9913 GN=H3-5 PE=2 SV=1;sp|Q3SZB8|H3CL_BOVIN Histone H3.3C-like OS=Bos taurus OX=9913 PE=2 SV=3;sp|P84227|H32_BOVIN Histone H3.2 OS=
NaN	NaN	NaN	NaN	NaN	NaN	21.0456	NaN	20.8886	23.6835	21.1265	21.7776	0.303623	0.582628	Q24K22	Q24K22		sp|Q24K22|HGFL_BOVIN Hepatocyte growth factor-like protein OS=Bos taurus OX=9913 GN=MST1 PE=2 SV=1
19.7423	19.5103	18.6631	19.4044	20.4526	21.1836	20.2231	19.7961	19.3095	18.3423	18.9203	20.3209	0.312111	0.593569	CON__ENSEMBL:ENSBTAP00000023055	CON__ENSEMBL:ENSBTAP00000023055
21.5471	NaN	NaN	25.3879	23.6883	23.6044	26.054	24.3586	25.5016	26.5531	24.3847	25.4942	0.31533	0.594383	Q32KY0	Q32KY0		sp|Q32KY0|APOD_BOVIN Apolipoprotein D OS=Bos taurus OX=9913 GN=APOD PE=2 SV=1
NaN	NaN	NaN	21.5937	22.2267	23.286	21.5362	NaN	20.2151	NaN	22.7584	21.0856	0.335999	0.626224	Q3SYV4	Q3SYV4		sp|Q3SYV4|CAP1_BOVIN Adenylyl cyclase-associated protein 1 OS=Bos taurus OX=9913 GN=CAP1 PE=2 SV=3
19.5408	19.0508	NaN	19.1403	20	20.3208	19.4601	NaN	18.2303	NaN	NaN	NaN	0.338102	0.626224	P80109	P80109		sp|P80109|PHLD_BOVIN Phosphatidylinositol-glycan-specific phospholipase D OS=Bos taurus OX=9913 GN=GPLD1 PE=1 SV=1
NaN	NaN	NaN	13.7227	NaN	NaN	NaN	24.9462	19.4131	NaN	20.0646	15.7004	0.346935	0.626355	CON__Q9BYQ5;CON__Q9BYR4	CON__Q9BYQ5
15.4589	18.0991	16.8008	24.0728	19.1077	14.5726	16.664	30.5013	23.1034	18.8719	26.0923	21.963	0.347737	0.626355	CON__O43790	CON__O43790
NaN	21.2136	NaN	22.0481	22.781	23.3889	22.3165	NaN	22.0268	NaN	23.0249	NaN	0.348394	0.626355	Q2KIG3;CON__Q2KIG3	Q2KIG3;CON__Q2KIG3		sp|Q2KIG3|CBPB2_BOVIN Carboxypeptidase B2 OS=Bos taurus OX=9913 GN=CPB2 PE=1 SV=1;
NaN	NaN	NaN	14.9029	16.1586	NaN	16.2563	16.7963	NaN	NaN	18.3121	16.2496	0.351738	0.626355	A6QP79	A6QP79		sp|A6QP79|COL12_BOVIN Collectin-12 OS=Bos taurus OX=9913 GN=COLEC12 PE=2 SV=1
NaN	NaN	20.0725	21.5739	NaN	22.7732	20.1092	22.5038	20.3636	NaN	NaN	NaN	0.352994	0.626355	P63103	P63103		sp|P63103|1433Z_BOVIN 14-3-3 protein zeta/delta OS=Bos taurus OX=9913 GN=YWHAZ PE=1 SV=1
NaN	NaN	NaN	17.3106	NaN	NaN	18.4239	18.506	18.1572	NaN	20.3721	18.1669	0.355817	0.626355	Q2HJ49	Q2HJ49		sp|Q2HJ49|MOES_BOVIN Moesin OS=Bos taurus OX=9913 GN=MSN PE=2 SV=3
22.6922	20.6021	NaN	21.7154	21.052	NaN	21.7049	21.3354	20.932	23.4645	21.3097	23.3079	0.37446	0.6518	P01035	P01035		sp|P01035|CYTC_BOVIN Cystatin-C OS=Bos taurus OX=9913 GN=CST3 PE=1 SV=2
NaN	NaN	NaN	NaN	19.8817	20.5641	20.041	19.6061	NaN	18.6141	18.9987	20.23	0.376392	0.6518	Q5E9F7	Q5E9F7		sp|Q5E9F7|COF1_BOVIN Cofilin-1 OS=Bos taurus OX=9913 GN=CFL1 PE=2 SV=3
NaN	NaN	NaN	NaN	NaN	NaN	20.1478	NaN	18.2245	20.1383	19.8688	19.7766	0.384592	0.657882	O62644	O62644		sp|O62644|LECT2_BOVIN Leukocyte cell-derived chemotaxin-2 OS=Bos taurus OX=9913 GN=LECT2 PE=1 SV=1
NaN	19.0161	NaN	20.0189	NaN	20.9507	20.0716	NaN	19.8427	NaN	NaN	19.9525	0.386081	0.657882	P05689	P05689		sp|P05689|CATZ_BOVIN Cathepsin Z OS=Bos taurus OX=9913 GN=CTSZ PE=2 SV=2
NaN	NaN	18.8868	23.321	21.3674	23.6273	22.16	22.652	21.0207	NaN	23.3661	22.9984	0.389952	0.659205	CON__Q2TBQ1	CON__Q2TBQ1
NaN	NaN	NaN	19.3689	20.3654	20.4788	20.4697	20.5649	20.2117	NaN	NaN	NaN	0.402385	0.674867	P53710	P53710		sp|P53710|ITA2_BOVIN Integrin alpha-2 (Fragment) OS=Bos taurus OX=9913 GN=ITGA2 PE=2 SV=1
23.6891	24.9453	24.7651	26.1788	24.8077	23.9842	24.2685	24.2307	24.367	24.8556	23.3901	23.3998	0.42083	0.700287	Q0VCM5;CON__Q0VCM5	Q0VCM5;CON__Q0VCM5		sp|Q0VCM5|ITIH1_BOVIN Inter-alpha-trypsin inhibitor heavy chain H1 OS=Bos taurus OX=9913 GN=ITIH1 PE=1 SV=1;
24.507	24.8231	24.8425	26.6854	24.3921	26.58	25.7058	23.2939	24.9122	25.4743	23.1587	24.9128	0.427017	0.705075	P56652;CON__Q0V8M9	P56652;CON__Q0V8M9		sp|P56652|ITIH3_BOVIN Inter-alpha-trypsin inhibitor heavy chain H3 OS=Bos taurus OX=9913 GN=ITIH3 PE=1 SV=2;
22.9352	23.0401	23.4463	NaN	21.992	NaN	23.091	21.818	24.6494	NaN	21.6431	22.6161	0.475727	0.77946	CON__ENSEMBL:ENSBTAP00000038329	CON__ENSEMBL:ENSBTAP00000038329
NaN	NaN	20.3845	21.054	19.4477	20.3742	20.0074	19.3759	22.7041	NaN	19.2365	19.2951	0.488385	0.794092	P02465	P02465		sp|P02465|CO1A2_BOVIN Collagen alpha-2(I) chain OS=Bos taurus OX=9913 GN=COL1A2 PE=1 SV=2
24.6094	23.0958	23.4571	23.4262	23.8105	24.2902	22.3645	23.3081	22.7554	25.596	22.2071	24.148	0.49978	0.801122	P17690;CON__P17690	P17690;CON__P17690		sp|P17690|APOH_BOVIN Beta-2-glycoprotein 1 OS=Bos taurus OX=9913 GN=APOH PE=1 SV=4;
19.6765	NaN	NaN	NaN	20.0269	21.5125	19.9735	20.3209	NaN	NaN	20.6198	NaN	0.500231	0.801122	Q2TA49	Q2TA49		sp|Q2TA49|VASP_BOVIN Vasodilator-stimulated phosphoprotein OS=Bos taurus OX=9913 GN=VASP PE=2 SV=3
NaN	NaN	13.58	NaN	13.5285	NaN	14.5435	21.5318	15.8533	NaN	15.5432	15.1199	0.527186	0.837275	Q8SPJ1	Q8SPJ1		sp|Q8SPJ1|PLAK_BOVIN Junction plakoglobin OS=Bos taurus OX=9913 GN=JUP PE=2 SV=1
21.6446	21.6748	21.4588	22.4014	21.3343	22.3987	20.4998	22.355	21.1266	22.0638	21.7615	NaN	0.530667	0.837275	P00978;CON__P00978	P00978;CON__P00978		sp|P00978|AMBP_BOVIN Protein AMBP OS=Bos taurus OX=9913 GN=AMBP PE=1 SV=2;
NaN	NaN	NaN	21.1741	21.1974	NaN	21.137	20.9839	20.9163	20.9862	21.7156	21.0402	0.577529	0.904513	Q5E9E3	Q5E9E3		sp|Q5E9E3|C1QA_BOVIN Complement C1q subcomponent subunit A OS=Bos taurus OX=9913 GN=C1QA PE=2 SV=1
NaN	NaN	NaN	NaN	NaN	18.2923	18.8856	20.0913	19.0904	NaN	19.0856	19.0408	0.586143	0.911303	Q2TBU0	Q2TBU0		sp|Q2TBU0|HPT_BOVIN Haptoglobin OS=Bos taurus OX=9913 GN=HP PE=2 SV=1
NaN	NaN	NaN	21.7004	20.3523	20.0946	20.5724	19.4027	NaN	20.5703	19.6666	20.8053	0.603694	0.931788	CON__ENSEMBL:ENSBTAP00000037665	CON__ENSEMBL:ENSBTAP00000037665
29.885	29.2686	28.3942	31.9885	29.4278	30.0833	30.7203	27.9889	29.6355	31.2469	28.0834	30.0852	0.64656	0.990772	P02081;CON__Q3SX09;P06643;P06642	P02081;CON__Q3SX09		sp|P02081|HBBF_BOVIN Hemoglobin fetal subunit beta OS=Bos taurus OX=9913 PE=1 SV=1;
NaN	NaN	NaN	21.6909	22.3715	23.2055	22.943	23.0315	23.2348	20.7439	23.0338	23.6177	0.683405	1	P20959	P20959		sp|P20959|IBP3_BOVIN Insulin-like growth factor-binding protein 3 OS=Bos taurus OX=9913 GN=IGFBP3 PE=1 SV=3
NaN	NaN	19.0926	17.801	20.1071	20.3544	19.6273	18.6518	NaN	NaN	18.2552	18.812	0.686226	1	P15781	P15781		sp|P15781|PSPB_BOVIN Pulmonary surfactant-associated protein B OS=Bos taurus OX=9913 GN=SFTPB PE=1 SV=3
NaN	NaN	NaN	17.7545	19.962	19.7097	19.1807	18.7226	18.9154	NaN	19.3701	19.784	0.692354	1	Q29RU4	Q29RU4		sp|Q29RU4|CO6_BOVIN Complement component C6 OS=Bos taurus OX=9913 GN=C6 PE=2 SV=1
NaN	NaN	NaN	19.33	NaN	NaN	19.2613	27.6349	21.074	20.8178	21.6909	NaN	0.699471	1	CON__Q9UE12;CON__Q15323;CON__Q92764	CON__Q9UE12;CON__Q15323		;
NaN	NaN	18.2573	19.0734	21.9679	20.3124	NaN	21.4478	20.3725	19.9919	23.5634	NaN	0.706642	1	Q27971	Q27971		sp|Q27971|CAN2_BOVIN Calpain-2 catalytic subunit OS=Bos taurus OX=9913 GN=CAPN2 PE=2 SV=2
NaN	NaN	NaN	19.0506	NaN	NaN	NaN	26.2908	19.9252	NaN	22.8518	20.5995	0.72191	1	CON__Q9BYR9	CON__Q9BYR9
NaN	NaN	NaN	19.998	21.6685	22.0165	20.2703	21.3657	20.8602	18.3664	21.0587	21.8202	0.742982	1	Q05716	Q05716		sp|Q05716|IBP4_BOVIN Insulin-like growth factor-binding protein 4 OS=Bos taurus OX=9913 GN=IGFBP4 PE=2 SV=1
NaN	NaN	NaN	17.4	17.7014	19.596	18.1163	NaN	18.345	16.7146	NaN	18.3815	0.746839	1	Q3B7M5	Q3B7M5		sp|Q3B7M5|LASP1_BOVIN LIM and SH3 domain protein 1 OS=Bos taurus OX=9913 GN=LASP1 PE=2 SV=1
26.2699	26.3792	25.8098	25.3573	26.7208	25.9325	24.9456	26.4704	25.6755	25.9482	26.2477	25.3425	0.794923	1	P41361;CON__P41361	P41361;CON__P41361		sp|P41361|ANT3_BOVIN Antithrombin-III OS=Bos taurus OX=9913 GN=SERPINC1 PE=1 SV=2;
NaN	NaN	NaN	15.7953	NaN	16.8748	16.0317	NaN	16.3277	NaN	NaN	16.4028	0.807388	1	Q5EA01	Q5EA01		sp|Q5EA01|B4GA1_BOVIN Beta-1,4-glucuronyltransferase 1 OS=Bos taurus OX=9913 GN=B4GAT1 PE=2 SV=2
NaN	NaN	NaN	21.2468	20.4787	23.1663	22.2949	19.2633	21.1097	20.6118	NaN	21.9276	0.809846	1	P00743	P00743		sp|P00743|FA10_BOVIN Coagulation factor X OS=Bos taurus OX=9913 GN=F10 PE=1 SV=1
NaN	NaN	NaN	NaN	18.9949	NaN	18.5673	19.4108	19.8071	20.0538	18.9416	19.173	0.810417	1	Q28017	Q28017		sp|Q28017|PAFA_BOVIN Platelet-activating factor acetylhydrolase OS=Bos taurus OX=9913 GN=PLA2G7 PE=2 SV=1
NaN	NaN	NaN	20.454	NaN	NaN	21.4803	NaN	20.8474	21.5838	20.4926	NaN	0.860512	1	P19035	P19035		sp|P19035|APOC3_BOVIN Apolipoprotein C-III OS=Bos taurus OX=9913 GN=APOC3 PE=1 SV=2
NaN	NaN	NaN	16.7619	16.0677	18.4137	17.614	17.6517	16.7936	NaN	16.0961	17.6933	0.869781	1	Q5E9F5;Q3ZBY2	Q5E9F5;Q3ZBY2		sp|Q5E9F5|TAGL2_BOVIN Transgelin-2 OS=Bos taurus OX=9913 GN=TAGLN2 PE=2 SV=3;sp|Q3ZBY2|TAGL3_BOVIN Transgelin-3 OS=Bos taurus OX=9913 GN=TAGLN3 PE=2 SV=1
NaN	NaN	NaN	NaN	NaN	NaN	19.2716	20.397	NaN	19.102	20.2963	NaN	0.884292	1	P08487	P08487		sp|P08487|PLCG1_BOVIN 1-phosphatidylinositol 4,5-bisphosphate phosphodiesterase gamma-1 OS=Bos taurus OX=9913 GN=PLCG1 PE=1 SV=1
18.7798	NaN	NaN	20.8818	NaN	21.6638	20.8408	NaN	20.684	19.2442	NaN	22.2026	0.890852	1	Q5E956	Q5E956		sp|Q5E956|TPIS_BOVIN Triosephosphate isomerase OS=Bos taurus OX=9913 GN=TPI1 PE=2 SV=3
NaN	NaN	NaN	NaN	NaN	NaN	21.7867	21.5476	21.2836	19.9031	22.4489	21.9284	0.893678	1	P49907	P49907		sp|P49907|SEPP1_BOVIN Selenoprotein P OS=Bos taurus OX=9913 GN=SELENOP PE=2 SV=2
NaN	NaN	NaN	18.2642	15.8339	18.8849	18.2238	16.3438	17.3926	NaN	16.0804	18.169	0.904512	1	Q3SZJ4	Q3SZJ4		sp|Q3SZJ4|PTGR1_BOVIN Prostaglandin reductase 1 OS=Bos taurus OX=9913 GN=PTGR1 PE=2 SV=1
25.0768	25.0718	24.5218	27.3329	22.7663	24.8345	25.7512	22.7849	24.8956	26.8003	22.3008	24.7258	0.98326	1	P01017;CON__Q3SZH5	P01017;CON__Q3SZH5		sp|P01017|ANGT_BOVIN Angiotensinogen OS=Bos taurus OX=9913 GN=AGT PE=1 SV=2;
NaN	NaN	19.8049	NaN	NaN	NaN	NaN	NaN	NaN	NaN	NaN	NaN	1	1	A1A4R1	A1A4R1		sp|A1A4R1|H2A2C_BOVIN Histone H2A type 2-C OS=Bos taurus OX=9913 GN=H2AC20 PE=2 SV=1
NaN	NaN	19.7347	NaN	NaN	NaN	NaN	NaN	NaN	NaN	NaN	NaN	1	1	A2I7M9	A2I7M9		sp|A2I7M9|SPA32_BOVIN Serpin A3-2 OS=Bos taurus OX=9913 GN=SERPINA3-2 PE=3 SV=1
21.3958	23.0873	21.0097	18.297	NaN	NaN	NaN	NaN	18.7562	NaN	NaN	NaN	1	1	CON__A2I7N1;A2I7N1;Q3ZEJ6;CON__A2I7N0;A2I7N0;A2I7N2	CON__A2I7N1;A2I7N1;Q3ZEJ6;CON__A2I7N0;A2I7N0;A2I7N2		;sp|A2I7N1|SPA35_BOVIN Serpin A3-5 OS=Bos taurus OX=9913 GN=SERPINA3-5 PE=3 SV=1;sp|Q3ZEJ6|SPA33_BOVIN Serpin A3-3 OS=Bos taurus OX=9913 GN=SERPINA3-3 PE=1 SV=2;;sp|A2I7N0|SPA34_BOVIN Serpin A3-4 OS=Bos taurus OX=9913 GN=SERPINA3-4 PE=3 SV=1;sp|A2I7N2|SPA3
NaN	NaN	NaN	NaN	NaN	NaN	16.75	NaN	NaN	NaN	NaN	NaN	1	1	A5D7C2	A5D7C2		sp|A5D7C2|SDA1_BOVIN Protein SDA1 homolog OS=Bos taurus OX=9913 GN=SDAD1 PE=2 SV=1
NaN	NaN	NaN	NaN	NaN	NaN	NaN	NaN	NaN	28.9379	NaN	NaN	1	1	A6H6W9	A6H6W9		sp|A6H6W9|SDS3_BOVIN Sin3 histone deacetylase corepressor complex component SDS3 OS=Bos taurus OX=9913 GN=SUDS3 PE=2 SV=1
21.1564	21.3623	21.7264	NaN	NaN	NaN	NaN	NaN	NaN	NaN	NaN	NaN	1	1	A6QPQ2	A6QPQ2		sp|A6QPQ2|SPA38_BOVIN Serpin A3-8 OS=Bos taurus OX=9913 GN=SERPINA3-8 PE=2 SV=1
NaN	19.9922	NaN	21.3916	NaN	NaN	18.8641	NaN	NaN	NaN	NaN	NaN	1	1	E1BF81;CON__ENSEMBL:ENSBTAP00000023402	E1BF81;CON__ENSEMBL:ENSBTAP00000023402		sp|E1BF81|CBG_BOVIN Corticosteroid-binding globulin OS=Bos taurus OX=9913 GN=SERPINA6 PE=3 SV=1;
NaN	NaN	NaN	19.9795	NaN	NaN	NaN	NaN	NaN	19.4117	NaN	NaN	1	1	CON__ENSEMBL:ENSBTAP00000025008;Q3ZBU7;Q2HJ81;Q2T9S0	CON__ENSEMBL:ENSBTAP00000025008
19.2188	NaN	19.3935	20.3814	NaN	NaN	NaN	NaN	NaN	NaN	20.1443	NaN	1	1	CON__ENSEMBL:ENSBTAP00000034412	CON__ENSEMBL:ENSBTAP00000034412
NaN	NaN	NaN	NaN	NaN	NaN	NaN	21.0655	NaN	NaN	NaN	NaN	1	1	CON__O76011	CON__O76011
NaN	NaN	NaN	NaN	NaN	NaN	NaN	27.9847	19.5782	NaN	20.5784	NaN	1	1	CON__O76013;CON__O76015;CON__A2AB72;CON__A2VCT4	CON__O76013
NaN	NaN	NaN	NaN	NaN	NaN	NaN	21.5895	19.1025	NaN	NaN	NaN	1	1	CON__P08779	CON__P08779
NaN	NaN	NaN	NaN	NaN	NaN	NaN	23.5674	18.9298	NaN	18.3322	NaN	1	1	CON__P19013	CON__P19013
NaN	NaN	NaN	NaN	NaN	NaN	NaN	23.011	NaN	NaN	NaN	NaN	1	1	CON__Q14533	CON__Q14533
NaN	NaN	NaN	NaN	NaN	NaN	NaN	NaN	22.5852	NaN	NaN	22.8186	1	1	CON__Q1RMK2	CON__Q1RMK2
NaN	20.6892	NaN	NaN	NaN	NaN	NaN	NaN	NaN	NaN	NaN	NaN	1	1	CON__Q2HJF0	CON__Q2HJF0
NaN	NaN	NaN	NaN	NaN	NaN	NaN	NaN	19.3576	NaN	19.3814	20.5279	1	1	CON__Q2KJC7	CON__Q2KJC7
24.7173	23.8363	26.5603	NaN	NaN	NaN	NaN	NaN	21.3052	NaN	NaN	NaN	1	1	Q3SZR3;CON__Q3SZR3	Q3SZR3;CON__Q3SZR3		sp|Q3SZR3|A1AG_BOVIN Alpha-1-acid glycoprotein OS=Bos taurus OX=9913 GN=ORM1 PE=2 SV=1;
NaN	NaN	NaN	NaN	NaN	NaN	NaN	15.4664	NaN	NaN	NaN	NaN	1	1	CON__Q6NT21;CON__P78385	CON__Q6NT21;CON__P78385		;
NaN	NaN	19.6968	NaN	NaN	NaN	NaN	NaN	NaN	NaN	NaN	NaN	1	1	CON__Q6T181	CON__Q6T181
NaN	NaN	NaN	NaN	NaN	NaN	NaN	NaN	NaN	21.1481	19.9167	19.2028	1	1	CON__Q86YZ3	CON__Q86YZ3
NaN	NaN	NaN	NaN	15.2096	NaN	NaN	24.0722	NaN	NaN	20.2343	NaN	1	1	CON__Q8IUT8	CON__Q8IUT8
NaN	NaN	NaN	NaN	NaN	NaN	NaN	23.6301	NaN	NaN	NaN	NaN	1	1	CON__Q9BYQ7	CON__Q9BYQ7
NaN	NaN	NaN	NaN	NaN	NaN	NaN	25.7251	19.49	NaN	NaN	NaN	1	1	CON__Q9BYQ8	CON__Q9BYQ8
NaN	NaN	NaN	NaN	NaN	17.6073	NaN	27.8359	21.6298	NaN	20.6511	NaN	1	1	CON__Q9NSB2;CON__Q6ISB0	CON__Q9NSB2;CON__Q6ISB0		;
24.7341	25.301	25.6838	21.9739	NaN	NaN	NaN	NaN	22.6521	NaN	NaN	21.9618	1	1	CON__REFSEQ:XP_001252647	CON__REFSEQ:XP_001252647
NaN	NaN	NaN	20.0511	19.1008	NaN	NaN	NaN	NaN	NaN	NaN	NaN	1	1	P00741	P00741		sp|P00741|FA9_BOVIN Coagulation factor IX OS=Bos taurus OX=9913 GN=F9 PE=1 SV=2
NaN	NaN	19.7918	21.5036	NaN	20.4072	NaN	NaN	NaN	NaN	NaN	NaN	1	1	P00745	P00745		sp|P00745|PROC_BOVIN Vitamin K-dependent protein C (Fragment) OS=Bos taurus OX=9913 GN=PROC PE=1 SV=1
NaN	NaN	NaN	NaN	NaN	NaN	19.7823	NaN	NaN	NaN	NaN	NaN	1	1	P01030	P01030		sp|P01030|CO4_BOVIN Complement C4 (Fragment) OS=Bos taurus OX=9913 GN=C4 PE=1 SV=2
NaN	NaN	NaN	19.6248	NaN	20.3144	19.0896	NaN	NaN	NaN	NaN	19.174	1	1	P22226	P22226		sp|P22226|CTHL1_BOVIN Cathelicidin-1 OS=Bos taurus OX=9913 GN=CATHL1 PE=1 SV=2
NaN	NaN	NaN	NaN	NaN	NaN	NaN	NaN	17.6743	NaN	NaN	NaN	1	1	P28783	P28783		sp|P28783|S10A9_BOVIN Protein S100-A9 OS=Bos taurus OX=9913 GN=S100A9 PE=1 SV=3
NaN	NaN	NaN	NaN	NaN	NaN	NaN	NaN	NaN	NaN	NaN	18.3801	1	1	P39873	P39873		sp|P39873|RNBR_BOVIN Brain ribonuclease OS=Bos taurus OX=9913 GN=BRN PE=1 SV=3
NaN	NaN	NaN	NaN	NaN	NaN	NaN	21.3529	NaN	NaN	NaN	NaN	1	1	P48035	P48035		sp|P48035|FABP4_BOVIN Fatty acid-binding protein, adipocyte OS=Bos taurus OX=9913 GN=FABP4 PE=2 SV=2
NaN	NaN	NaN	16.2365	NaN	NaN	16.602	16.5118	18.5535	NaN	NaN	16.3602	1	1	P48616	P48616		sp|P48616|VIME_BOVIN Vimentin OS=Bos taurus OX=9913 GN=VIM PE=1 SV=3
NaN	NaN	NaN	20.2808	NaN	NaN	20.6703	NaN	NaN	19.6971	20.521	19.7392	1	1	P55906	P55906		sp|P55906|BGH3_BOVIN Transforming growth factor-beta-induced protein ig-h3 OS=Bos taurus OX=9913 GN=TGFBI PE=1 SV=2
NaN	NaN	NaN	20.4443	NaN	NaN	NaN	NaN	NaN	NaN	NaN	NaN	1	1	P62833;P61223	P62833;P61223		sp|P62833|RAP1A_BOVIN Ras-related protein Rap-1A OS=Bos taurus OX=9913 GN=RAP1A PE=1 SV=1;sp|P61223|RAP1B_BOVIN Ras-related protein Rap-1b OS=Bos taurus OX=9913 GN=RAP1B PE=2 SV=1
NaN	NaN	NaN	NaN	NaN	14.5665	NaN	16.6857	NaN	NaN	NaN	NaN	1	1	P62803	P62803		sp|P62803|H4_BOVIN Histone H4 OS=Bos taurus OX=9913 PE=1 SV=2
NaN	NaN	NaN	NaN	19.4028	NaN	NaN	NaN	20.2572	NaN	NaN	NaN	1	1	P62935;A4FV72	P62935;A4FV72		sp|P62935|PPIA_BOVIN Peptidyl-prolyl cis-trans isomerase A OS=Bos taurus OX=9913 GN=PPIA PE=1 SV=2;sp|A4FV72|PPIE_BOVIN Peptidyl-prolyl cis-trans isomerase E OS=Bos taurus OX=9913 GN=PPIE PE=2 SV=1
NaN	NaN	NaN	NaN	NaN	NaN	NaN	NaN	NaN	NaN	NaN	17.2017	1	1	P81282-2;P81282	P81282-2;P81282		sp|P81282-2|CSPG2_BOVIN Isoform V1 of Versican core protein OS=Bos taurus OX=9913 GN=VCAN;sp|P81282|CSPG2_BOVIN Versican core protein OS=Bos taurus OX=9913 GN=VCAN PE=1 SV=2
NaN	NaN	NaN	22.6867	20.1549	NaN	NaN	NaN	NaN	NaN	NaN	NaN	1	1	P81948;Q3ZCJ7;Q2HJB8;Q32KN8;P81947;Q2HJ86	P81948;Q3ZCJ7;Q2HJB8;Q32KN8;P81947;Q2HJ86		sp|P81948|TBA4A_BOVIN Tubulin alpha-4A chain OS=Bos taurus OX=9913 GN=TUBA4A PE=1 SV=2;sp|Q3ZCJ7|TBA1C_BOVIN Tubulin alpha-1C chain OS=Bos taurus OX=9913 GN=TUBA1C PE=1 SV=1;sp|Q2HJB8|TBA8_BOVIN Tubulin alpha-8 chain OS=Bos taurus OX=9913 GN=TUBA8 PE=2 SV=
NaN	NaN	NaN	NaN	NaN	NaN	NaN	NaN	NaN	NaN	NaN	19.1399	1	1	P82943	P82943		sp|P82943|REG1_BOVIN Regakine-1 OS=Bos taurus OX=9913 PE=1 SV=2
NaN	NaN	NaN	17.7782	17.8567	19.3367	NaN	NaN	NaN	NaN	NaN	NaN	1	1	Q06805	Q06805		sp|Q06805|TIE1_BOVIN Tyrosine-protein kinase receptor Tie-1 OS=Bos taurus OX=9913 GN=TIE1 PE=2 SV=1
NaN	NaN	NaN	18.8832	NaN	NaN	NaN	22.1632	NaN	NaN	NaN	NaN	1	1	Q08D91;Q29S21;P05786	Q08D91		sp|Q08D91|K2C75_BOVIN Keratin, type II cytoskeletal 75 OS=Bos taurus OX=9913 GN=KRT75 PE=2 SV=1
NaN	NaN	NaN	NaN	NaN	NaN	NaN	20.0434	NaN	NaN	NaN	14.3004	1	1	Q08DQ0	Q08DQ0		sp|Q08DQ0|PKP3_BOVIN Plakophilin-3 OS=Bos taurus OX=9913 GN=PKP3 PE=2 SV=1
NaN	NaN	NaN	20.7882	20.0733	20.9142	NaN	NaN	NaN	NaN	NaN	NaN	1	1	Q0VCX1	Q0VCX1		sp|Q0VCX1|C1S_BOVIN Complement C1s subcomponent OS=Bos taurus OX=9913 GN=C1S PE=2 SV=2
NaN	NaN	16.5667	NaN	NaN	NaN	NaN	NaN	NaN	NaN	NaN	NaN	1	1	Q27975;Q27965;P0CB32	Q27975;Q27965;P0CB32		sp|Q27975|HS71A_BOVIN Heat shock 70 kDa protein 1A OS=Bos taurus OX=9913 GN=HSPA1A PE=1 SV=2;sp|Q27965|HS71B_BOVIN Heat shock 70 kDa protein 1B OS=Bos taurus OX=9913 GN=HSPA1B PE=2 SV=1;sp|P0CB32|HS71L_BOVIN Heat shock 70 kDa protein 1-like OS=Bos taurus O
NaN	NaN	NaN	20.8601	20.4178	22.7891	NaN	NaN	19.821	NaN	NaN	20.0878	1	1	Q32LP0	Q32LP0		sp|Q32LP0|URP2_BOVIN Fermitin family homolog 3 OS=Bos taurus OX=9913 GN=FERMT3 PE=2 SV=1
NaN	NaN	NaN	NaN	NaN	NaN	NaN	NaN	NaN	NaN	NaN	17.6545	1	1	Q3MHL4	Q3MHL4		sp|Q3MHL4|SAHH_BOVIN Adenosylhomocysteinase OS=Bos taurus OX=9913 GN=AHCY PE=2 SV=3
NaN	NaN	NaN	NaN	NaN	NaN	20.2926	NaN	NaN	NaN	20.6458	20.4433	1	1	Q3SWW8	Q3SWW8		sp|Q3SWW8|TSP4_BOVIN Thrombospondin-4 OS=Bos taurus OX=9913 GN=THBS4 PE=2 SV=1
NaN	NaN	NaN	NaN	NaN	NaN	NaN	NaN	NaN	NaN	20.2314	NaN	1	1	Q3SYW2	Q3SYW2		sp|Q3SYW2|CO2_BOVIN Complement C2 OS=Bos taurus OX=9913 GN=C2 PE=2 SV=1
NaN	NaN	NaN	19.9737	NaN	20.3135	17.9094	NaN	NaN	NaN	NaN	NaN	1	1	Q3SZI4;P68509;P68252;Q0VC36;P62261	Q3SZI4;P68509;P68252;Q0VC36;P62261		sp|Q3SZI4|1433T_BOVIN 14-3-3 protein theta OS=Bos taurus OX=9913 GN=YWHAQ PE=1 SV=1;sp|P68509|1433F_BOVIN 14-3-3 protein eta OS=Bos taurus OX=9913 GN=YWHAH PE=1 SV=2;sp|P68252|1433G_BOVIN 14-3-3 protein gamma OS=Bos taurus OX=9913 GN=YWHAG PE=1 SV=2;sp|Q0V
NaN	NaN	NaN	NaN	NaN	NaN	NaN	NaN	NaN	NaN	NaN	18.0392	1	1	Q3T124-2;Q3T124	Q3T124-2;Q3T124		sp|Q3T124-2|OSTA_BOVIN Isoform 2 of Organic solute transporter subunit alpha OS=Bos taurus OX=9913 GN=SLC51A;sp|Q3T124|OSTA_BOVIN Organic solute transporter subunit alpha OS=Bos taurus OX=9913 GN=SLC51A PE=2 SV=1
NaN	19.2551	NaN	18.9405	NaN	19.7992	NaN	NaN	NaN	NaN	NaN	19.426	1	1	Q6URK6	Q6URK6		sp|Q6URK6|CADH5_BOVIN Cadherin-5 OS=Bos taurus OX=9913 GN=CDH5 PE=2 SV=1
NaN	NaN	20.7499	21.563	NaN	NaN	NaN	NaN	NaN	NaN	NaN	20.344	1	1	Q76LV2	Q76LV2		sp|Q76LV2|HS90A_BOVIN Heat shock protein HSP 90-alpha OS=Bos taurus OX=9913 GN=HSP90AA1 PE=1 SV=3
NaN	NaN	NaN	19.8733	NaN	18.5916	NaN	NaN	NaN	NaN	NaN	NaN	1	1	Q95122	Q95122		sp|Q95122|CD14_BOVIN Monocyte differentiation antigen CD14 OS=Bos taurus OX=9913 GN=CD14 PE=2 SV=2

## Sheet: table7
Table 7. Ratio analysis with differencial abundant proteins
DMEM_1	DMEM_2	DMEM_3		NUAD_1	NUAD_2	NUAD_3		ZFD_1	ZFD_2	ZFD_3		ZWD_1	ZWD_2	ZWD_3		ANOVA p value	corrected p-value	Protein IDs	Majority protein IDs				Ratio
DMEM	DMEM	DMEM	Média	NUAD	NUAD	NUAD	Média	ZFD	ZFD	ZFD	Média	ZWD	ZWD	ZWD	Média		Benjamini Hockberg						DMEM x NUD	Log2	DMEM x ZFD	Log2	DMEM x ZWD	Log2	NUAD x ZFD	Log2	NUAD x ZWD	Log2	ZFD x ZWD	Log2
1.4944e+07	2.4904e+07	3.3126e+07	2.43247e+07	3.5493e+08	7.7708e+08	5.0361e+08	5.45207e+08	9.1131e+08	1.1732e+09	8.4059e+08	9.75033e+08	1.7445e+09	2.3505e+09	1.7203e+09	1.93843e+09	5.29486e-07	0.000112781	CON__Q3SX14	CON__Q3SX14				0.0446155	-4.48631	0.0249475	-5.32496	0.0125486	-6.31633	0.559167	-0.838649	0.281261	-1.83002	0.503001	-0.991368
6.0287e+06	3.2046e+06	8.7283e+06	5.9872e+06	4.6389e+07	4.4667e+07	4.6833e+07	4.5963e+07	1.6204e+08	9.0609e+07	1.5144e+08	1.34696e+08	8.6496e+07	7.0031e+07	8.3861e+07	8.01294e+07	6.73969e-06	0.000717777	P13384	P13384				0.130261	-2.94052	0.0444496	-4.49169	0.0747192	-3.74238	0.341234	-1.55117	0.57361	-0.801858	1.68099	0.749308
2.6012e+07	3.2415e+07	2.1546e+07	2.66577e+07	2.0474e+08	2.7151e+08	1.0289e+08	1.93047e+08	3.4629e+08	2.195e+08	3.3453e+08	3.00107e+08	4.2137e+08	4.4146e+08	3.2314e+08	3.95323e+08	2.1235e-05	0.00150769	Q28085;CON__Q28085	Q28085;CON__Q28085				0.138089	-2.85633	0.0888273	-3.49285	0.0674326	-3.89041	0.64326	-0.636525	0.488326	-1.03408	0.759142	-0.397558
273220	268000	451510	330910	2.103e+07	1.261e+08	8.2274e+07	7.6468e+07	7.842e+07	5.8865e+07	1.9277e+07	5.21873e+07	1.5127e+07	3.5126e+07	3.7293e+07	2.9182e+07	3.3453e-05	0.00155464	P35445;CON__ENSEMBL:ENSBTAP00000006074	P35445;CON__ENSEMBL:ENSBTAP00000006074				0.00432743	-7.85227	0.00634081	-7.30112	0.0113395	-6.4625	1.46526	0.551156	2.62038	1.38978	1.78834	0.838621
2.8977e+10	2.8906e+10	2.4697e+10	2.75267e+10	2.0612e+09	1.6867e+09	1.8072e+09	1.8517e+09	2.4083e+09	1.994e+09	6.03571e+09	3.47933e+09	4.7283e+09	3.0004e+09	3.1829e+09	3.6372e+09	3.88089e-05	0.00155464	P02769;CON__P02769	P02769;CON__P02769				14.8656	3.89391	7.91147	2.98395	7.56808	2.91993	0.532199	-0.909961	0.5091	-0.973979	0.956597	-0.0640175
8.8488e+07	5.191e+07	8.0173e+07	7.35237e+07	4.8024e+08	3.5469e+08	3.4402e+08	3.92983e+08	2.6068e+08	1.7145e+08	1.9982e+08	2.1065e+08	3.3365e+08	3.5237e+08	2.6387e+08	3.1663e+08	4.87527e-05	0.00155464	CON__Q3KUS7;P81187	CON__Q3KUS7;P81187				0.187091	-2.41819	0.349032	-1.51857	0.232207	-2.10652	1.86558	0.89962	1.24114	0.31167	0.665287	-0.58795
1.7725e+08	1.4485e+08	2.3114e+08	1.84413e+08	6.2396e+08	7.8612e+08	2.9937e+08	5.69817e+08	1.9792e+09	1.4366e+09	1.1768e+09	1.53087e+09	2.1658e+09	1.8402e+09	1.8122e+09	1.9394e+09	5.27837e-05	0.00155464	CON__P00761	CON__P00761				0.323636	-1.62756	0.120463	-3.05333	0.0950878	-3.3946	0.372218	-1.42578	0.293811	-1.76704	0.789351	-0.341262
4.7103e+06	7.6085e+06	3.9084e+06	5.40907e+06	6.5208e+07	1.329e+08	8.2252e+07	9.34533e+07	6.5917e+07	1.6895e+08	5.012e+07	9.49957e+07	2.4699e+08	2.143e+08	1.117e+08	1.90997e+08	5.83904e-05	0.00155464	CON__Q28194	CON__Q28194				0.0578799	-4.11079	0.0569401	-4.13441	0.0283202	-5.14202	0.983764	-0.0236163	0.489293	-1.03123	0.497368	-1.00761
1.4941e+07	1.2646e+07	2.9206e+07	1.8931e+07	8.1907e+07	9.5167e+07	1.5483e+08	1.10635e+08	2.7745e+08	2.0189e+08	2.5438e+08	2.44573e+08	7.1864e+08	2.8057e+08	2.0499e+08	4.014e+08	0.000139671	0.00307276	Q2KIS7;CON__Q2KIS7	Q2KIS7;CON__Q2KIS7				0.171113	-2.54698	0.0774042	-3.69144	0.0471624	-4.40622	0.452358	-1.14446	0.275622	-1.85924	0.609301	-0.714774
1.8781e+06	1.4665e+06	1.7483e+06	1.69763e+06	3.548e+07	4.0736e+07	3.0652e+07	3.56227e+07	9.1797e+07	1.4461e+08	2.3583e+07	8.66633e+07	4.4038e+07	1.8051e+08	7.6017e+07	1.00188e+08	0.000144261	0.00307276	Q03247;CON__Q03247	Q03247;CON__Q03247				0.047656	-4.3912	0.0195888	-5.67382	0.0169444	-5.88305	0.411047	-1.28263	0.355557	-1.49185	0.865004	-0.209221
1.1845e+06	4.2658e+06	1.2029e+06	2.21773e+06	6.9628e+06	1.0471e+07	4.0355e+06	7.15644e+06	7.6104e+07	4.449e+07	5.0624e+07	5.70727e+07	1.5469e+07	3.8531e+07	3.1256e+07	2.84187e+07	0.000189851	0.00346682	CON__P35908;CON__Q6NXH9;P04262;P04260;Q148H8;CON__Q7RTS7;A7YWK3	CON__P35908				0.309894	-1.69015	0.0388581	-4.68564	0.0780379	-3.67968	0.125392	-2.99549	0.251822	-1.98953	2.00828	1.00596
1.3782e+09	1.2085e+09	1.4567e+09	1.3478e+09	4.7196e+08	3.1097e+08	4.433e+08	4.08743e+08	2.0731e+08	2.7417e+08	3.0704e+08	2.6284e+08	4.5529e+08	3.7361e+08	2.1435e+08	3.4775e+08	0.000195314	0.00346682	Q7SIH1;CON__ENSEMBL:ENSBTAP00000024146	Q7SIH1;CON__ENSEMBL:ENSBTAP00000024146				3.29742	1.72134	5.12783	2.35835	3.87577	1.95448	1.5551	0.63701	1.17539	0.233144	0.75583	-0.403866
4.5264e+06	975420	1.0129e+07	5.21027e+06	7.6203e+07	2.6081e+08	1.493e+08	1.62104e+08	7.5341e+08	5.4147e+08	2.7029e+08	5.21723e+08	5.0766e+08	9.11971e+08	1.7493e+08	5.3152e+08	0.000276779	0.00453491	CON__ENSEMBL:ENSBTAP00000032840	CON__ENSEMBL:ENSBTAP00000032840				0.0321415	-4.95942	0.00998666	-6.64578	0.00980259	-6.67262	0.310709	-1.68636	0.304982	-1.7132	0.981568	-0.0268395
		1.1705e+06	1.1705e+06	4.1182e+06	1.9512e+06	2.7634e+06	2.94427e+06	5.827e+06	5.1922e+06	3.3936e+06	4.80427e+06	2.1999e+07	1.8984e+07	3.0075e+07	2.3686e+07	0.000348551	0.00530296	Q8SPP7	Q8SPP7				0.397552	-1.33078	0.243638	-2.03719	0.0494174	-4.33884	0.612844	-0.706408	0.124304	-3.00805	0.202832	-2.30165
4.7801e+06	5.1266e+06	4.8523e+06	4.91967e+06	2.912e+07	6.6262e+07	1.9991e+07	3.84577e+07	1.7947e+07	1.9249e+07	1.5324e+07	1.75067e+07	8.0095e+07	4.3468e+07	3.3783e+07	5.24487e+07	0.000388712	0.00551971	Q9N2I2;CON__Q9N2I2	Q9N2I2;CON__Q9N2I2				0.127924	-2.96664	0.281017	-1.83127	0.0937997	-3.41427	2.19674	1.13537	0.733244	-0.447635	0.333787	-1.583
1.2831e+08	2.1299e+08	1.969e+08	1.794e+08	1.0076e+09	7.74301e+08	5.0858e+08	7.63493e+08	2.0797e+09	9.2332e+08	1.2728e+09	1.42527e+09	2.7014e+09	8.5258e+08	1.3666e+09	1.64019e+09	0.000848991	0.0113022	CON__ENSEMBL:ENSBTAP00000007350	CON__ENSEMBL:ENSBTAP00000007350				0.234972	-2.08944	0.125871	-2.98999	0.109377	-3.19261	0.535682	-0.900551	0.46549	-1.10318	0.868967	-0.202627
1.073e+06	4.011e+06	4.4845e+06	3.1895e+06	2.206e+07	3.571e+07	5.1109e+06	2.09603e+07	1.8354e+08	3.0535e+07	8.3493e+07	9.91893e+07	5.3913e+08	1.5848e+08	1.3929e+08	2.78967e+08	0.00122831	0.0140148	CON__P04264;CON__Q6IFZ6;CON__H-INV:HIT000016045;CON__Q7Z794;CON__Q9H552;CON__Q9R0H5	CON__P04264				0.152169	-2.71626	0.0321557	-4.95878	0.0114333	-6.45062	0.211316	-2.24253	0.0751355	-3.73436	0.35556	-1.49184
7.5028e+08	7.7602e+08	6.5526e+08	7.27187e+08	2.4612e+08	2.6947e+07	4.0505e+08	2.26039e+08	4.1411e+07	1.1364e+07	6.3492e+07	3.87557e+07	1.299e+07	6.4445e+06	3.6296e+06	7.68803e+06	0.00129546	0.0140148	Q58D62;CON__Q58D62	Q58D62;CON__Q58D62				3.21708	1.68575	18.7634	4.22985	94.5868	6.56357	5.83241	2.54409	29.4014	4.87781	5.04104	2.33372
3.6663e+08	4.499e+08	5.1846e+08	4.44997e+08	5.1002e+07	2.2884e+07	4.4734e+07	3.954e+07	1.9781e+07	1.0519e+07	8.5332e+07	3.8544e+07	7.292e+06	1.4441e+07	2.9187e+07	1.69733e+07	0.00129799	0.0140148	Q3MHN5;CON__Q3MHN5	Q3MHN5;CON__Q3MHN5				11.2543	3.49241	11.5452	3.52922	26.2174	4.71245	1.02584	0.036806	2.32954	1.22004	2.27086	1.18324
926609	507940	3.255e+06	1.56318e+06	1.3414e+07	7.0934e+07	3.563e+07	3.99927e+07	2.8451e+07	1.0867e+08	3.1363e+07	5.61613e+07	2.5291e+07	8.965e+07	3.3515e+07	4.94854e+07	0.00131594	0.0140148	P07589	P07589				0.0390867	-4.67718	0.0278338	-5.16702	0.0315888	-4.98444	0.712103	-0.489842	0.808172	-0.307266	1.13491	0.182576
1.5292e+08	1.4231e+08	3.2137e+08	2.05533e+08	2.9738e+07	2.7536e+07	6.1868e+07	3.9714e+07	1.724e+07	9.04811e+06	3.5919e+07	2.07357e+07	3.2454e+06	1.2029e+07	1.4131e+07	9.8018e+06	0.0014495	0.0147021	Q3SZV7;CON__Q3SZV7	Q3SZV7;CON__Q3SZV7				5.17534	2.37165	9.91205	3.30918	20.9689	4.39018	1.91525	0.937531	4.05171	2.01853	2.1155	1.081
3.3871e+06	2.4933e+06	1.0428e+07	5.43613e+06	4.3587e+07	5.9873e+07	2.9343e+07	4.42676e+07	1.9192e+07	9.68511e+06	9.48049e+06	1.27859e+07	3.2304e+07	6.2468e+07	2.9444e+07	4.14053e+07	0.00172348	0.0166864	Q29RQ1;CON__Q29RQ1	Q29RQ1;CON__Q29RQ1				0.122801	-3.0256	0.425167	-1.2339	0.131291	-2.92916	3.46223	1.7917	1.06913	0.0964361	0.308798	-1.69527
6.9172e+08	8.7909e+08	7.2296e+08	7.6459e+08	3.9358e+09	3.0464e+09	2.7331e+09	3.23843e+09	9.8643e+08	4.5939e+08	9.1122e+08	7.8568e+08	1.3668e+09	5.4679e+08	9.95609e+08	9.69733e+08	0.00183989	0.017039	Q2UVX4;CON__Q2UVX4	Q2UVX4;CON__Q2UVX4				0.236099	-2.08254	0.973157	-0.0392559	0.788454	-0.342901	4.12182	2.04328	3.33951	1.73964	0.810203	-0.303645
4.4758e+06	3.3114e+06	3.7352e+06	3.8408e+06	2.2281e+06	2.2512e+06	1.8509e+06	2.11007e+06	3.2289e+06	3.3178e+06	1.5177e+06	2.68813e+06	8.302e+07	1.4784e+07	1.2707e+07	3.6837e+07	0.00268366	0.0238175	CON__ENSEMBL:ENSBTAP00000024462	CON__ENSEMBL:ENSBTAP00000024462				1.82023	0.864118	1.4288	0.514802	0.104265	-3.26168	0.784956	-0.349316	0.0572812	-4.12579	0.0729737	-3.77648
7.474e+07	6.9087e+07	3.7964e+07	6.0597e+07	1.3423e+07	1.6222e+07	1.0219e+07	1.3288e+07	1.7634e+07	1.2994e+07	1.0165e+07	1.35977e+07	4.2538e+06	1.0618e+07	1.5792e+07	1.02213e+07	0.00291618	0.0248459	P28800;CON__P28800	P28800;CON__P28800				4.56028	2.18912	4.45643	2.15589	5.92852	2.56767	0.977227	-0.033235	1.30003	0.37855	1.33033	0.411785
1.2484e+06	885320	1.354e+06	1.16257e+06		895800		895800	1.4895e+06	2.8737e+06	1.3263e+06	1.8965e+06	5.2684e+06	6.0468e+06	3.6228e+06	4.97933e+06	0.00347953	0.026257	Q3T0A3	Q3T0A3				1.2978	0.376072	0.61301	-0.706018	0.23348	-2.09863	0.472344	-1.08209	0.179904	-2.4747	0.380874	-1.39261
3.5341e+06	3.8702e+06	4.4077e+06	3.93733e+06	7.4049e+07	1.1277e+08	1.1999e+08	1.0227e+08	6.3401e+07	1.0732e+07	4.0055e+07	3.80627e+07	9.12041e+06	3.1398e+07	7.1039e+07	3.71858e+07	0.00349131	0.026257	CON__Q32PI4	CON__Q32PI4				0.0384995	-4.69902	0.103443	-3.27309	0.105883	-3.23946	2.68687	1.42593	2.75023	1.45955	1.02358	0.0336258
2.5546e+07	3.7441e+07	8.54e+07	4.94623e+07	1.4605e+07	3.6907e+07	6.9988e+07	4.05e+07	8.0839e+08	3.2944e+08	2.9108e+08	4.76303e+08	1.1086e+08	2.8912e+08	3.7859e+08	2.59523e+08	0.00350013	0.026257	CON__P02768-1	CON__P02768-1				1.22129	0.288408	0.103846	-3.26748	0.190589	-2.39146	0.0850298	-3.55589	0.156055	-2.67987	1.8353	0.876017
4.8782e+06	1.1506e+07	4.7588e+06	7.04767e+06	5.3222e+07	9.239e+07	8.9333e+07	7.8315e+07	2.1399e+07	9.317e+06	3.7697e+07	2.28043e+07	1.0927e+07	3.0594e+07	2.5471e+07	2.23307e+07	0.00358506	0.026257	P02676;CON__P02676	P02676;CON__P02676				0.0899913	-3.47407	0.30905	-1.69409	0.315605	-1.66381	3.43422	1.77998	3.50706	1.81026	1.02121	0.0302817
4.2828e+09	3.4195e+09	3.7376e+09	3.8133e+09	4.4902e+08	5.692e+08	1.57e+09	8.6274e+08	3.6704e+08	2.8265e+08	1.2907e+09	6.46797e+08	4.2044e+08	3.0279e+08	4.8512e+08	4.02783e+08	0.00369816	0.026257	P34955;CON__P34955	P34955;CON__P34955				4.41999	2.14404	5.89567	2.55966	9.46737	3.24296	1.33387	0.415613	2.14195	1.09892	1.60582	0.683309
9.6538e+07	7.8163e+07	1.0695e+08	9.38837e+07	1.8996e+08	2.4544e+08	3.2734e+08	2.54247e+08	1.0078e+08	4.3802e+07	9.625e+07	8.02773e+07	9.1288e+07	7.3987e+07	1.006e+08	8.8625e+07	0.00404267	0.027777	Q3T052;CON__Q3T052	Q3T052;CON__Q3T052				0.369262	-1.43728	1.16949	0.225882	1.05934	0.0831604	3.1671	1.66316	2.86879	1.52044	0.905809	-0.142721
1.9974e+09	3.1929e+09	4.9068e+09	3.3657e+09	6.0306e+08	2.1383e+08	4.2626e+08	4.14383e+08	9.3338e+08	3.7713e+08	1.0187e+09	7.76403e+08	1.4277e+09	6.8414e+08	8.3012e+08	9.80653e+08	0.0041869	0.027869	P12763;CON__P12763	P12763;CON__P12763				8.12219	3.02187	4.33499	2.11603	3.4321	1.77909	0.533722	-0.90584	0.422559	-1.24278	0.791721	-0.336936
	4.1627e+06	2.8678e+06	3.51525e+06	1.7405e+07	2.0047e+07	4.6641e+07	2.8031e+07	1.7575e+07	1.3572e+07	1.9474e+07	1.68737e+07	2.4917e+07	1.072e+07	1.6825e+07	1.74873e+07	0.0045032	0.0290547	P12799	P12799				0.125406	-2.99532	0.208328	-2.26307	0.201017	-2.31461	1.66123	0.73225	1.60293	0.680713	0.964908	-0.0515371
	2.8877e+07	2.4847e+07	2.6862e+07	6.5957e+06	7.3376e+06		6.96665e+06	8.6517e+06			8.6517e+06		9.14629e+06		9.14629e+06	0.00463785	0.0290547	P51186	P51186				3.8558	1.94703	3.10482	1.63451	2.93693	1.55431	0.805235	-0.312518	0.761691	-0.392722	0.945924	-0.080204
2.2627e+06	3.7685e+06	1.7653e+06	2.59883e+06	1.9025e+07	2.2327e+07	1.5477e+07	1.8943e+07	4.791e+07	8.3608e+06	3.4894e+07	3.03883e+07	2.6973e+07	1.2402e+07	5.2526e+07	3.06337e+07	0.00505446	0.03076	CON__P01030	CON__P01030				0.137192	-2.86573	0.0855209	-3.54758	0.0848358	-3.55918	0.623366	-0.681849	0.618372	-0.693453	0.991989	-0.0116039
2.937e+08	2.7222e+08	1.9954e+08	2.55153e+08	3.297e+08	2.3784e+08	3.7511e+08	3.14217e+08	1.2021e+08	2.0937e+07	8.211e+07	7.4419e+07	6.2211e+07	2.6127e+07	6.5687e+07	5.13417e+07	0.00554788	0.032825	CON__Q9TRI1	CON__Q9TRI1				0.81203	-0.300396	3.4286	1.77762	4.96971	2.31316	4.22226	2.07802	6.12011	2.61356	1.44949	0.535541
3.367e+06	2.0124e+07	1.1211e+07	1.15673e+07	1.9146e+07	4.7865e+07	1.5627e+07	2.7546e+07	2.5443e+08	8.9382e+07	9.4272e+07	1.46028e+08	4.0924e+07	1.1837e+08	1.0571e+08	8.83346e+07	0.00580078	0.0333937	CON__P13645;P06394;CON__P02535-1;CON__P05784;Q148H6;CON__Q148H6;CON__Q7Z3Y7;Q0P5J4;CON__Q7Z3Z0;CON__Q7Z3Y8;Q0P5J6;CON__Q7Z3Y9;CON__Q2M2I5	CON__P13645				0.419928	-1.25179	0.0792131	-3.65812	0.130949	-2.93292	0.188635	-2.40633	0.311837	-1.68114	1.65312	0.725193
2.1026e+06	2.5738e+06	2.6383e+06	2.43823e+06	1.0977e+07	1.5105e+07	1.4455e+07	1.35123e+07	6.2684e+06	1.0336e+07	7.2864e+06	7.9636e+06	1.8684e+06	5.9971e+06	8.6602e+06	5.50857e+06	0.00718837	0.0402927	Q32PJ2;CON__Q32PJ2	Q32PJ2;CON__Q32PJ2				0.180445	-2.47037	0.306172	-1.70758	0.442626	-1.17584	1.69676	0.762784	2.45297	1.29453	1.44568	0.531744
	504170	804950	654560	3.5862e+06	1.1909e+07	8.4269e+06	7.97403e+06	3.5283e+07	4.0398e+07	1.9234e+07	3.16383e+07	905199	1.0874e+07	6.1074e+06	5.9622e+06	0.00741566	0.0405009	Q5E9Z2	Q5E9Z2				0.0820864	-3.60671	0.0206888	-5.595	0.109785	-3.18725	0.252037	-1.98829	1.33743	0.419464	5.30648	2.40776
1.1304e+06	927230		1.02881e+06	4.1701e+06	3.685e+06	5.5013e+06	4.45213e+06	4.3873e+06			4.3873e+06	862120		1.7218e+06	1.29196e+06	0.00916269	0.0487913	P02453;CON__Q862S4	P02453				0.231084	-2.11351	0.234499	-2.09235	0.796321	-0.328578	1.01478	0.0211631	3.44603	1.78493	3.39585	1.76377
384590	1.1065e+06		745545	4.2094e+06	1.9379e+07	1.4984e+07	1.28575e+07	6.7691e+06	1.0121e+07	3.3712e+06	6.75377e+06	1.6805e+06	3.2442e+06	3.6739e+06	2.8662e+06	0.00983725	0.0511057	CON__Q2KIH2	CON__Q2KIH2				0.0579854	-4.10817	0.110389	-3.17933	0.260116	-1.94277	1.90375	0.928842	4.48589	2.16539	2.35635	1.23655
5.545e+06	1.4932e+07	1.8144e+07	1.28737e+07	7.5526e+07	7.6789e+07	1.1439e+08	8.89017e+07	5.8997e+07	8.1568e+07	3.2716e+07	5.77603e+07	6.8381e+06	3.0175e+07	3.2831e+07	2.32814e+07	0.0116702	0.0584316	P00735;CON__P00735	P00735;CON__P00735				0.144808	-2.78779	0.222881	-2.16566	0.55296	-0.854753	1.53915	0.622132	3.81858	1.93303	2.48097	1.3109
9.76081e+06	1.8887e+07	2.1923e+07	1.68569e+07	5.8681e+07	4.0845e+07	7.4171e+07	5.7899e+07	5.72e+07	2.7037e+07	4.7615e+07	4.39507e+07	3.9211e+07	3.3424e+07	5.9018e+07	4.38843e+07	0.0120259	0.0584316	P50448;CON__P50448	P50448;CON__P50448				0.291144	-1.7802	0.383542	-1.38254	0.384122	-1.38036	1.31736	0.397653	1.31936	0.399833	1.00151	0.00217995
148960	152540	166650	156050	777920	725290	2.4098e+06	1.30434e+06	2.4875e+06		753520	1.62051e+06		441610		441610	0.0120704	0.0584316	Q5NTB3	Q5NTB3				0.119639	-3.06324	0.0962968	-3.37637	0.353366	-1.50076	0.804892	-0.313132	2.95359	1.56247	3.66955	1.8756
4.87e+06	9.3062e+06	9.464e+06	7.88007e+06	6.9588e+07	4.9951e+07	9.5083e+06	4.30158e+07	3.117e+06	1.052e+07	5.6816e+06	6.43953e+06	1.1065e+06	1.5138e+06	4.7541e+06	2.45813e+06	0.0124451	0.0587711	P81644;CON__P81644	P81644;CON__P81644				0.18319	-2.44859	1.2237	0.291252	3.20571	1.68065	6.67995	2.73984	17.4994	4.12923	2.61969	1.38939
1.2068e+08	8.2051e+07	1.1527e+08	1.06e+08	1.6791e+07	2.6868e+07	5.6697e+07	3.3452e+07	1.4614e+07	1.6986e+07	8.54111e+07	3.90037e+07	4.6947e+06	7.4132e+06	1.729e+07	9.7993e+06	0.0126924	0.0587711	Q9TTE1;CON__Q9TTE1	Q9TTE1;CON__Q9TTE1				3.16873	1.6639	2.7177	1.44239	10.8171	3.43525	0.857663	-0.221518	3.41371	1.77134	3.98025	1.99286
3.4174e+06	1.5001e+06	1.7989e+06	2.2388e+06	2.9756e+07	5.799e+07	1.564e+07	3.4462e+07	2.0817e+07	7.1817e+07	2.7574e+07	4.00693e+07	4.6165e+06	7.0824e+07	3.8943e+07	3.81279e+07	0.0138026	0.0615116	Q28107;CON__Q28107	Q28107;CON__Q28107				0.0649643	-3.94421	0.0558731	-4.1617	0.0587182	-4.09005	0.860059	-0.217492	0.903854	-0.145839	1.05092	0.0716531
		2.1016e+06	2.1016e+06	5.1135e+06		5.021e+06	5.06725e+06	2.3551e+06		1.9156e+06	2.13535e+06			3.2849e+06	3.2849e+06	0.0139233	0.0615116	CON__Q3MHH8	CON__Q3MHH8				0.414742	-1.26971	0.984195	-0.0229838	0.639777	-0.64436	2.37303	1.24673	1.54259	0.625354	0.650051	-0.621376
1.3926e+07	4.5167e+06	1.4535e+07	1.09926e+07	7.1277e+07	3.7679e+07	1.0576e+08	7.1572e+07	5.3143e+07	2.8293e+07	3.3244e+07	3.82267e+07	1.0136e+08	3.7886e+07	2.8325e+07	5.5857e+07	0.0141505	0.0615116	CON__ENSEMBL:ENSBTAP00000018574	CON__ENSEMBL:ENSBTAP00000018574				0.153588	-2.70287	0.287563	-1.79805	0.196798	-2.34521	1.87231	0.904816	1.28134	0.357657	0.684367	-0.547159
5.2452e+07	8.6812e+07	4.5542e+07	6.1602e+07	1.5228e+08	1.9303e+08	3.1599e+08	2.20433e+08	1.3359e+08	5.7932e+07	1.0029e+08	9.72707e+07	1.0584e+08	9.6795e+07	1.7094e+08	1.24525e+08	0.0161319	0.0687221	P06868;CON__P06868	P06868;CON__P06868				0.279459	-1.83929	0.633305	-0.659027	0.494696	-1.01539	2.26619	1.18027	1.77019	0.823907	0.781134	-0.356359
3.3241e+06	7.4778e+06	6.4785e+06	5.76013e+06	2.7636e+06	2.2315e+06	3.2741e+06	2.7564e+06	2.9612e+06	1.1649e+07	1.3115e+07	9.24174e+06	1.252e+07	1.8698e+07	1.4205e+07	1.5141e+07	0.0164935	0.0688848	P01044;CON__P01044-1;P01044-2	P01044;CON__P01044-1;P01044-2				2.08973	1.06332	0.623274	-0.682062	0.380433	-1.39429	0.298256	-1.74538	0.182049	-2.4576	0.610378	-0.712225
2.0916e+07	4.0154e+07	1.7754e+07	2.62747e+07	7.0428e+06	1.2978e+07	1.0335e+07	1.01186e+07	1.6514e+07	3.1979e+07	4.9393e+07	3.26287e+07	2.7096e+07	9.34e+07	6.549e+07	6.19953e+07	0.0179752	0.0734513	P01045;CON__P01045-1;P01045-2	P01045;CON__P01045-1;P01045-2				2.59667	1.37666	0.805263	-0.312468	0.423817	-1.23849	0.310114	-1.68913	0.163215	-2.61515	0.526309	-0.926019
	161540		161540	9.9449e+06	3.8701e+07	8.6662e+06	1.9104e+07	5.0822e+07	6.673e+07	4.2724e+07	5.34253e+07	3.1302e+08	8.4481e+07	8.819e+07	1.61897e+08	0.0182766	0.0734513	CON__P35527	CON__P35527				0.00845581	-6.88584	0.00302366	-8.36949	0.000997796	-9.96897	0.357584	-1.48365	0.118001	-3.08313	0.329996	-1.59948
2.0611e+07	2.894e+07		2.47755e+07	2.5352e+07	3.2764e+07	1.6186e+07	2.47673e+07	1.39e+07	1.4101e+07	1.5095e+07	1.43653e+07	1.3047e+07	6.6064e+06	1.1018e+07	1.02238e+07	0.0199648	0.0778876	Q3MHN2;CON__Q3MHN2	Q3MHN2;CON__Q3MHN2				1.00033	0.000475459	1.72467	0.786323	2.42332	1.27698	1.7241	0.785847	2.42252	1.27651	1.40509	0.49066
1.5566e+09	2.8919e+09	1.9041e+09	2.11753e+09	8.6253e+06	1.3016e+06	3.4929e+06	4.47327e+06	8.1616e+06	125040	1.4612e+08	5.14689e+07	1.4265e+08	2.7293e+06	8.8934e+06	5.14242e+07	0.0203024	0.0778876	CON__Q29443;Q29443;CON__Q0IIK2	CON__Q29443;Q29443;CON__Q0IIK2				473.375	8.88684	41.142	5.36254	41.1778	5.36379	0.0869121	-3.5243	0.0869876	-3.52305	1.00087	0.00125182
1.5351e+07	2.32e+07	1.6062e+07	1.82043e+07	1.1601e+08	1.9696e+08	3.5328e+07	1.16099e+08	4.3015e+07	1.5782e+08	4.5013e+07	8.19494e+07	2.0914e+08	2.6361e+08	7.6289e+07	1.83013e+08	0.0208017	0.0778876	Q95121;CON__Q95121	Q95121;CON__Q95121				0.1568	-2.67301	0.222141	-2.17045	0.0994702	-3.32959	1.41672	0.502555	0.634378	-0.656586	0.447779	-1.15914
3.0415e+06			3.0415e+06	3.4171e+06	1.7446e+06		2.58085e+06	2.4922e+07	2.1731e+07	9.2427e+06	1.86319e+07		1.3484e+07	2.1435e+07	1.74595e+07	0.0208432	0.0778876	Q03763	Q03763				1.17849	0.236937	0.163242	-2.61492	0.174203	-2.52116	0.138518	-2.85186	0.147819	-2.75809	1.06715	0.0937619
			#DIV/0!	379950	542290		461120	938640	865090	902630	902120		850979	1.2474e+06	1.04919e+06	0.0219771	0.080709	P53712	P53712				#DIV/0!	#DIV/0!	#DIV/0!	#DIV/0!	#DIV/0!	#DIV/0!	0.511151	-0.968177	0.439501	-1.18606	0.859825	-0.217884
1.1675e+07	1.2708e+07	7.7887e+06	1.07239e+07	2.3834e+07	3.3109e+07	5.4594e+07	3.7179e+07	1.0563e+07	1.1395e+07	1.2945e+07	1.16343e+07	4.646e+06	1.7366e+07	1.3912e+07	1.19747e+07	0.0233598	0.0839733	CON__ENSEMBL:ENSBTAP00000016046	CON__ENSEMBL:ENSBTAP00000016046				0.28844	-1.79366	0.921746	-0.117558	0.895549	-0.159156	3.19563	1.6761	3.10481	1.6345	0.971579	-0.0415973
8.1177e+07	8.782e+07	9.28479e+07	8.72817e+07	5.497e+07	9.9362e+07	6.105e+07	7.1794e+07	6.1627e+06	4.0625e+07	1.4405e+07	2.03976e+07		4.2556e+07	2.4677e+07	3.36165e+07	0.0236545	0.0839733	P68103;Q32PH8	P68103;Q32PH8				1.21572	0.281816	4.27903	2.09728	2.59639	1.37651	3.51973	1.81547	2.13568	1.09469	0.606772	-0.720773
275540	793070	661770	576793	4.305e+06	6.44e+06	2.4461e+06	4.39703e+06	2.16e+07	1.4097e+07	3.5619e+07	2.3772e+07	1.0506e+06	8.0447e+07	8.6924e+07	5.61405e+07	0.0289929	0.101238	P33433	P33433				0.131178	-2.9304	0.0242635	-5.36507	0.0102741	-6.60485	0.184967	-2.43466	0.0783219	-3.67444	0.423437	-1.23978
7.2133e+06	1.7927e+07	3.1588e+07	1.89094e+07	2.8021e+06		2.7807e+06	2.7914e+06	2.3757e+06		2.9032e+06	2.63945e+06	8.643e+06			8.643e+06	0.0298837	0.102665	CON__A2I7N3;A2I7N3	CON__A2I7N3;A2I7N3				6.77417	2.76004	7.16415	2.8408	2.18783	1.1295	1.05757	0.0807519	0.322967	-1.63054	0.305386	-1.71129
			#DIV/0!	6.6267e+06		5.0507e+06	5.8387e+06	1.2947e+07	5.3518e+06	1.2463e+07	1.02539e+07	1.9029e+07	1.6281e+07	2.0199e+07	1.8503e+07	0.0311885	0.105447	CON__P02777	CON__P02777				#DIV/0!	#DIV/0!	#DIV/0!	#DIV/0!	#DIV/0!	#DIV/0!	0.569411	-0.812459	0.315554	-1.66404	0.554177	-0.851582
	1.0339e+06	1.033e+06	1.03345e+06	1.1096e+06	2.6227e+06	872910	1.53507e+06	3.0938e+06	5.7086e+07	1.41e+07	2.47599e+07	5.687e+06	1.6461e+07	5.0715e+06	9.07317e+06	0.0329924	0.109803	CON__P13647	CON__P13647				0.673227	-0.570836	0.0417388	-4.58247	0.113902	-3.13414	0.0619982	-4.01163	0.169188	-2.5633	2.72892	1.44833
4.4738e+06	3.1967e+06	1.2752e+06	2.9819e+06	3.5825e+07	4.6944e+07	3.0663e+07	3.78107e+07	1.1893e+07	4.6457e+07	2.7709e+07	2.86863e+07	2.4515e+06	4.5888e+07	4.1374e+07	2.99045e+07	0.040885	0.133977	Q2KJ63	Q2KJ63				0.078864	-3.66449	0.103948	-3.26606	0.0997141	-3.32606	1.31807	0.39843	1.26438	0.33843	0.959265	-0.0599993
			#DIV/0!		767140	1.0341e+06	900620		456280	777060	616670		292970	270740	281855	0.0425194	0.135322	A6QQF6	A6QQF6				#DIV/0!	#DIV/0!	#DIV/0!	#DIV/0!	#DIV/0!	#DIV/0!	1.46046	0.546419	3.19533	1.67597	2.1879	1.12955
1.5707e+07	1.2676e+07	2.6159e+07	1.81807e+07	3.3848e+07	4.8673e+07	6.2255e+07	4.82587e+07	2.7941e+07	6.774e+07	2.2432e+07	3.9371e+07	1.272e+07	2.0937e+07	2.2046e+07	1.85677e+07	0.0425661	0.135322	P02672;CON__P02672	P02672;CON__P02672				0.376734	-1.40838	0.461778	-1.11473	0.979157	-0.0303879	1.22574	0.293655	2.59907	1.378	2.1204	1.08434
3.2613e+06			3.2613e+06	1.8605e+07	1.079e+07	1.1503e+07	1.36327e+07	3.8088e+06	7.1601e+06	3.832e+06	4.93364e+06	2.8433e+06	8.0077e+06	6.4905e+06	5.7805e+06	0.0434481	0.136095	P10096	P10096				0.239227	-2.06355	0.661034	-0.597203	0.56419	-0.825747	2.76321	1.46634	2.35839	1.2378	0.853496	-0.228543
	5.4301e+06	7.5722e+06	6.50115e+06	3.2321e+07	3.5978e+06	1.5311e+07	1.70766e+07	3.3942e+06	839540	2.1112e+06	2.11498e+06	3.1049e+06	1.5418e+06	1.124e+06	1.92357e+06	0.0450169	0.138965	P17697;CON__P17697	P17697;CON__P17697				0.380705	-1.39325	3.07386	1.62005	3.37974	1.75691	8.07412	3.01331	8.87757	3.15017	1.09951	0.13686
2.2032e+06	2.5904e+06	2.5922e+06	2.46193e+06	4.7862e+06		2.9655e+06	3.87585e+06	2.1634e+06		2.3246e+06	2.244e+06	1.6303e+06		2.0648e+06	1.84755e+06	0.046052	0.14013	Q95M17;CON__Q95M17	Q95M17;CON__Q95M17				0.635198	-0.654721	1.09712	0.133719	1.33254	0.414178	1.72721	0.788439	2.09783	1.0689	1.21458	0.280459

## Sheet: table8
Table 8. Venn diagramn
Proteins exclisives: DMEM		Proteins exclisives: NUAD		Proteins exclisives: ZFD		Proteins exclisives: ZWD		Proteins identified: DMEM		Proteins identified: NUAD		Proteins identified: ZFD		Proteins identified: ZWD
A1A4R1		P00741		A5D7C2		A6H6W9		Protein IDs		Protein IDs		Protein IDs		Protein IDs
A2I7M9		P62833;P61223		CON__O76011		CON__Q86YZ3		A1A4R1		CON__A2I7N1;A2I7N1;Q3ZEJ6;CON__A2I7N0;A2I7N0;A2I7N2		CON__A2I7N1;A2I7N1;Q3ZEJ6;CON__A2I7N0;A2I7N0;A2I7N2		CON__A2I7N3;A2I7N3
A6QPQ2		P81948;Q3ZCJ7;Q2HJB8;Q32KN8;P81947;Q2HJ86		CON__P08779		P39873		A2I7M9		CON__A2I7N3;A2I7N3		CON__A2I7N3;A2I7N3		Q5E9F8;A5PK61;Q3SZB8;P84227;P68432
CON__Q2HJF0		Q06805		CON__Q14533		P81282-2;P81282		CON__A2I7N1;A2I7N1;Q3ZEJ6;CON__A2I7N0;A2I7N0;A2I7N2		Q5E9F8;A5PK61;Q3SZB8;P84227;P68432		A5D7C2		A6H6W9
CON__Q6T181		Q0VCX1		CON__Q6NT21;CON__P78385		P82943		CON__A2I7N3;A2I7N3		A6QP79		Q5E9F8;A5PK61;Q3SZB8;P84227;P68432		A6QP79
Q27975;Q27965;P0CB32		Q95122		CON__Q9BYQ7		Q3MHL4		A6QPQ2		A6QQF6		A6QP79		A6QQF6
				CON__Q9BYQ8		Q3SYW2		CON__ENSEMBL:ENSBTAP00000007350		CON__ENSEMBL:ENSBTAP00000007350		A6QQF6		CON__ENSEMBL:ENSBTAP00000007350
				P01030		Q3T124-2;Q3T124		CON__ENSEMBL:ENSBTAP00000014147		CON__ENSEMBL:ENSBTAP00000014147		CON__ENSEMBL:ENSBTAP00000007350		CON__ENSEMBL:ENSBTAP00000014147
				P28783				CON__ENSEMBL:ENSBTAP00000016046		CON__ENSEMBL:ENSBTAP00000016046		CON__ENSEMBL:ENSBTAP00000014147		CON__ENSEMBL:ENSBTAP00000016046
				P48035				CON__ENSEMBL:ENSBTAP00000018229		CON__ENSEMBL:ENSBTAP00000018574		CON__ENSEMBL:ENSBTAP00000016046		CON__ENSEMBL:ENSBTAP00000018229
								CON__ENSEMBL:ENSBTAP00000018574		CON__ENSEMBL:ENSBTAP00000023055		CON__ENSEMBL:ENSBTAP00000018229		CON__ENSEMBL:ENSBTAP00000018574
								CON__ENSEMBL:ENSBTAP00000023055		E1BF81;CON__ENSEMBL:ENSBTAP00000023402		CON__ENSEMBL:ENSBTAP00000018574		CON__ENSEMBL:ENSBTAP00000023055
								E1BF81;CON__ENSEMBL:ENSBTAP00000023402		CON__ENSEMBL:ENSBTAP00000024462		CON__ENSEMBL:ENSBTAP00000023055		CON__ENSEMBL:ENSBTAP00000024462
								CON__ENSEMBL:ENSBTAP00000024462		CON__ENSEMBL:ENSBTAP00000025008;Q3ZBU7;Q2HJ81;Q2T9S0		E1BF81;CON__ENSEMBL:ENSBTAP00000023402		CON__ENSEMBL:ENSBTAP00000025008;Q3ZBU7;Q2HJ81;Q2T9S0
								CON__ENSEMBL:ENSBTAP00000032840		CON__ENSEMBL:ENSBTAP00000032840		CON__ENSEMBL:ENSBTAP00000024462		CON__ENSEMBL:ENSBTAP00000032840
								CON__ENSEMBL:ENSBTAP00000034412		CON__ENSEMBL:ENSBTAP00000034412		CON__ENSEMBL:ENSBTAP00000032840		CON__ENSEMBL:ENSBTAP00000034412
								CON__ENSEMBL:ENSBTAP00000038329		CON__ENSEMBL:ENSBTAP00000037665		CON__ENSEMBL:ENSBTAP00000037665		CON__ENSEMBL:ENSBTAP00000037665
								CON__O43790		CON__ENSEMBL:ENSBTAP00000038329		CON__ENSEMBL:ENSBTAP00000038329		CON__ENSEMBL:ENSBTAP00000038329
								P00735;CON__P00735		CON__O43790		CON__O43790		CON__O43790
								CON__P00761		P00735;CON__P00735		CON__O76011		CON__O76013;CON__O76015;CON__A2AB72;CON__A2VCT4
								P00978;CON__P00978		CON__P00761		CON__O76013;CON__O76015;CON__A2AB72;CON__A2VCT4		P00735;CON__P00735
								CON__P01030		P00978;CON__P00978		P00735;CON__P00735		CON__P00761
								P01044;CON__P01044-1;P01044-2		CON__P01030		CON__P00761		P00978;CON__P00978
								P01045;CON__P01045-1;P01045-2		P01044;CON__P01044-1;P01044-2		P00978;CON__P00978		CON__P01030
								P01966;CON__P01966		P01045;CON__P01045-1;P01045-2		CON__P01030		P01044;CON__P01044-1;P01044-2
								P02070;CON__P02070		P01966;CON__P01966		P01044;CON__P01044-1;P01044-2		P01045;CON__P01045-1;P01045-2
								CON__P02533;CON__Q04695;CON__Q9QWL7;A1L595;CON__Q6IFX2;CON__A2A4G1;CON__P08727;CON__P19001;CON__P19012;P05785;CON__Q61782;CON__P08730-1;CON__Q9Z2K1;CON__Q3ZAW8		P02070;CON__P02070		P01045;CON__P01045-1;P01045-2		P01966;CON__P01966
								P02672;CON__P02672		CON__P02533;CON__Q04695;CON__Q9QWL7;A1L595;CON__Q6IFX2;CON__A2A4G1;CON__P08727;CON__P19001;CON__P19012;P05785;CON__Q61782;CON__P08730-1;CON__Q9Z2K1;CON__Q3ZAW8		P01966;CON__P01966		P02070;CON__P02070
								P02676;CON__P02676		P02672;CON__P02672		P02070;CON__P02070		CON__P02533;CON__Q04695;CON__Q9QWL7;A1L595;CON__Q6IFX2;CON__A2A4G1;CON__P08727;CON__P19001;CON__P19012;P05785;CON__Q61782;CON__P08730-1;CON__Q9Z2K1;CON__Q3ZAW8
								CON__P02768-1		P02676;CON__P02676		CON__P02533;CON__Q04695;CON__Q9QWL7;A1L595;CON__Q6IFX2;CON__A2A4G1;CON__P08727;CON__P19001;CON__P19012;P05785;CON__Q61782;CON__P08730-1;CON__Q9Z2K1;CON__Q3ZAW8		P02672;CON__P02672
								P02769;CON__P02769		CON__P02768-1		P02672;CON__P02672		P02676;CON__P02676
								CON__P04258;P04258		P02769;CON__P02769		P02676;CON__P02676		CON__P02768-1
								CON__P04264;CON__Q6IFZ6;CON__H-INV:HIT000016045;CON__Q7Z794;CON__Q9H552;CON__Q9R0H5		CON__P02777		CON__P02768-1		P02769;CON__P02769
								P06868;CON__P06868		CON__P04258;P04258		P02769;CON__P02769		CON__P02777
								P12763;CON__P12763		CON__P04264;CON__Q6IFZ6;CON__H-INV:HIT000016045;CON__Q7Z794;CON__Q9H552;CON__Q9R0H5		CON__P02777		CON__P04258;P04258
								CON__P13645;P06394;CON__P02535-1;CON__P05784;Q148H6;CON__Q148H6;CON__Q7Z3Y7;Q0P5J4;CON__Q7Z3Z0;CON__Q7Z3Y8;Q0P5J6;CON__Q7Z3Y9;CON__Q2M2I5		P06868;CON__P06868		CON__P04258;P04258		CON__P04264;CON__Q6IFZ6;CON__H-INV:HIT000016045;CON__Q7Z794;CON__Q9H552;CON__Q9R0H5
								CON__P13647		P12763;CON__P12763		CON__P04264;CON__Q6IFZ6;CON__H-INV:HIT000016045;CON__Q7Z794;CON__Q9H552;CON__Q9R0H5		P06868;CON__P06868
								P15497;CON__P15497		CON__P13645;P06394;CON__P02535-1;CON__P05784;Q148H6;CON__Q148H6;CON__Q7Z3Y7;Q0P5J4;CON__Q7Z3Z0;CON__Q7Z3Y8;Q0P5J6;CON__Q7Z3Y9;CON__Q2M2I5		P06868;CON__P06868		P12763;CON__P12763
								P17690;CON__P17690		CON__P13647		CON__P08779		CON__P13645;P06394;CON__P02535-1;CON__P05784;Q148H6;CON__Q148H6;CON__Q7Z3Y7;Q0P5J4;CON__Q7Z3Z0;CON__Q7Z3Y8;Q0P5J6;CON__Q7Z3Y9;CON__Q2M2I5
								P17697;CON__P17697		P15497;CON__P15497		P12763;CON__P12763		CON__P13647
								P28800;CON__P28800		P17690;CON__P17690		CON__P13645;P06394;CON__P02535-1;CON__P05784;Q148H6;CON__Q148H6;CON__Q7Z3Y7;Q0P5J4;CON__Q7Z3Z0;CON__Q7Z3Y8;Q0P5J6;CON__Q7Z3Y9;CON__Q2M2I5		P15497;CON__P15497
								P34955;CON__P34955		P17697;CON__P17697		CON__P13647		P17690;CON__P17690
								CON__P35527		P28800;CON__P28800		P15497;CON__P15497		P17697;CON__P17697
								CON__P35908;CON__Q6NXH9;P04262;P04260;Q148H8;CON__Q7RTS7;A7YWK3		P34955;CON__P34955		P17690;CON__P17690		CON__P19013
								P41361;CON__P41361		CON__P35527		P17697;CON__P17697		P28800;CON__P28800
								P50448;CON__P50448		CON__P35908;CON__Q6NXH9;P04262;P04260;Q148H8;CON__Q7RTS7;A7YWK3		CON__P19013		P34955;CON__P34955
								P68301;P67983;P58280;P55943;P55942;CON__P67983		P41361;CON__P41361		P28800;CON__P28800		CON__P35527
								P81644;CON__P81644		P50448;CON__P50448		P34955;CON__P34955		CON__P35908;CON__Q6NXH9;P04262;P04260;Q148H8;CON__Q7RTS7;A7YWK3
								Q03247;CON__Q03247		CON__P78386;CON__Q9NSB4		CON__P35527		P41361;CON__P41361
								Q05443;CON__Q05443		P81644;CON__P81644		CON__P35908;CON__Q6NXH9;P04262;P04260;Q148H8;CON__Q7RTS7;A7YWK3		P50448;CON__P50448
								CON__Q29443;Q29443;CON__Q0IIK2		Q03247;CON__Q03247		P41361;CON__P41361		P68301;P67983;P58280;P55943;P55942;CON__P67983
								P56652;CON__Q0V8M9		Q05443;CON__Q05443		P50448;CON__P50448		CON__P78386;CON__Q9NSB4
								Q0VCM5;CON__Q0VCM5		CON__Q29443;Q29443;CON__Q0IIK2		P68301;P67983;P58280;P55943;P55942;CON__P67983		P81644;CON__P81644
								CON__Q14525;Q0P5J7;CON__Q497I4;A7YWM2;CON__Q6IFU5		P56652;CON__Q0V8M9		CON__P78386;CON__Q9NSB4		Q03247;CON__Q03247
								CON__Q1A7A4;P12082		Q0VCM5;CON__Q0VCM5		P81644;CON__P81644		Q05443;CON__Q05443
								CON__Q1RMN8		CON__Q14525;Q0P5J7;CON__Q497I4;A7YWM2;CON__Q6IFU5		Q03247;CON__Q03247		CON__Q29443;Q29443;CON__Q0IIK2
								Q28065;CON__Q28065		CON__Q9UE12;CON__Q15323;CON__Q92764		CON__Q29443;Q29443;CON__Q0IIK2		P56652;CON__Q0V8M9
								Q28085;CON__Q28085		CON__Q1A7A4;P12082		P56652;CON__Q0V8M9		Q0VCM5;CON__Q0VCM5
								Q28107;CON__Q28107		CON__Q1RMN8		Q0VCM5;CON__Q0VCM5		CON__Q14525;Q0P5J7;CON__Q497I4;A7YWM2;CON__Q6IFU5
								CON__Q28194		Q28065;CON__Q28065		CON__Q14525;Q0P5J7;CON__Q497I4;A7YWM2;CON__Q6IFU5		CON__Q9UE12;CON__Q15323;CON__Q92764
								Q29RQ1;CON__Q29RQ1		Q28085;CON__Q28085		CON__Q14533		CON__Q1A7A4;P12082
								CON__Q2HJF0		Q28107;CON__Q28107		CON__Q9UE12;CON__Q15323;CON__Q92764		CON__Q1RMK2
								CON__Q2KIF2		CON__Q28194		CON__Q1A7A4;P12082		CON__Q1RMN8
								Q2KIG3;CON__Q2KIG3		Q29RQ1;CON__Q29RQ1		CON__Q1RMK2		Q28065;CON__Q28065
								CON__Q2KIH2		CON__Q2KIF2		CON__Q1RMN8		Q28085;CON__Q28085
								Q2KIS7;CON__Q2KIS7		Q2KIG3;CON__Q2KIG3		Q28065;CON__Q28065		Q28107;CON__Q28107
								CON__Q2KJ62		CON__Q2KIH2		Q28085;CON__Q28085		CON__Q28194
								Q2KJF1;CON__Q2KJF1		Q2KIS7;CON__Q2KIS7		Q28107;CON__Q28107		Q29RQ1;CON__Q29RQ1
								CON__Q2TBQ1		CON__Q2KJ62		CON__Q28194		CON__Q2KIF2
								CON__Q32PI4		Q2KJF1;CON__Q2KJF1		Q29RQ1;CON__Q29RQ1		Q2KIG3;CON__Q2KIG3
								Q32PJ2;CON__Q32PJ2		CON__Q2TBQ1		CON__Q2KIF2		CON__Q2KIH2
								CON__Q3KUS7;P81187		CON__Q32PI4		Q2KIG3;CON__Q2KIG3		Q2KIS7;CON__Q2KIS7
								CON__Q3MHH8		Q32PJ2;CON__Q32PJ2		CON__Q2KIH2		CON__Q2KJ62
								Q3MHN2;CON__Q3MHN2		CON__Q3KUS7;P81187		Q2KIS7;CON__Q2KIS7		CON__Q2KJC7
								Q3MHN5;CON__Q3MHN5		CON__Q3MHH8		CON__Q2KJ62		Q2KJF1;CON__Q2KJF1
								CON__Q3SX14		Q3MHN2;CON__Q3MHN2		CON__Q2KJC7		CON__Q2TBQ1
								Q3SZ57;CON__Q3SZ57		Q3MHN5;CON__Q3MHN5		Q2KJF1;CON__Q2KJF1		CON__Q32PI4
								Q3SZR3;CON__Q3SZR3		CON__Q3SX14		CON__Q2TBQ1		Q32PJ2;CON__Q32PJ2
								Q3SZV7;CON__Q3SZV7		Q3SZ57;CON__Q3SZ57		CON__Q32PI4		CON__Q3KUS7;P81187
								Q3T052;CON__Q3T052		Q3SZV7;CON__Q3SZV7		Q32PJ2;CON__Q32PJ2		CON__Q3MHH8
								Q3Y5Z3;CON__Q3Y5Z3		Q3T052;CON__Q3T052		CON__Q3KUS7;P81187		Q3MHN2;CON__Q3MHN2
								CON__Q3ZBS7		Q3Y5Z3;CON__Q3Y5Z3		CON__Q3MHH8		Q3MHN5;CON__Q3MHN5
								Q58D62;CON__Q58D62		CON__Q3ZBS7		Q3MHN2;CON__Q3MHN2		CON__Q3SX14
								CON__Q6T181		Q58D62;CON__Q58D62		Q3MHN5;CON__Q3MHN5		Q3SZ57;CON__Q3SZ57
								Q95121;CON__Q95121		CON__Q8IUT8		CON__Q3SX14		Q3SZV7;CON__Q3SZV7
								Q95M17;CON__Q95M17		Q95121;CON__Q95121		Q3SZ57;CON__Q3SZ57		Q3T052;CON__Q3T052
								Q9N2I2;CON__Q9N2I2		Q95M17;CON__Q95M17		Q3SZR3;CON__Q3SZR3		Q3Y5Z3;CON__Q3Y5Z3
								CON__Q9TRI1		CON__Q9BYQ5;CON__Q9BYR4		Q3SZV7;CON__Q3SZV7		CON__Q3ZBS7
								Q9TT36;CON__Q9TT36		CON__Q9BYR9		Q3T052;CON__Q3T052		Q58D62;CON__Q58D62
								Q9TTE1;CON__Q9TTE1		Q9N2I2;CON__Q9N2I2		Q3Y5Z3;CON__Q3Y5Z3		CON__Q86YZ3
								CON__REFSEQ:XP_001252647		CON__Q9NSB2;CON__Q6ISB0		CON__Q3ZBS7		CON__Q8IUT8
								G3MYZ3;CON__REFSEQ:XP_585019		CON__Q9TRI1		Q58D62;CON__Q58D62		Q95121;CON__Q95121
								O46375		Q9TT36;CON__Q9TT36		CON__Q6NT21;CON__P78385		Q95M17;CON__Q95M17
								P00745		Q9TTE1;CON__Q9TTE1		CON__Q8IUT8		CON__Q9BYQ5;CON__Q9BYR4
								P01017;CON__Q3SZH5		CON__REFSEQ:XP_001252647		Q95121;CON__Q95121		CON__Q9BYR9
								P01035		G3MYZ3;CON__REFSEQ:XP_585019		Q95M17;CON__Q95M17		Q9N2I2;CON__Q9N2I2
								P02081;CON__Q3SX09;P06643;P06642		O46375		CON__Q9BYQ5;CON__Q9BYR4		CON__Q9NSB2;CON__Q6ISB0
								P02453;CON__Q862S4		P00741		CON__Q9BYQ7		CON__Q9TRI1
								P02465		P00743		CON__Q9BYQ8		Q9TT36;CON__Q9TT36
								P05689		P00745		CON__Q9BYR9		Q9TTE1;CON__Q9TTE1
								P07589		P01017;CON__Q3SZH5		Q9N2I2;CON__Q9N2I2		CON__REFSEQ:XP_001252647
								P10096		P01035		CON__Q9NSB2;CON__Q6ISB0		G3MYZ3;CON__REFSEQ:XP_585019
								P12799		P02081;CON__Q3SX09;P06643;P06642		CON__Q9TRI1		O46375
								P13135		P02453;CON__Q862S4		Q9TT36;CON__Q9TT36		O62644
								P13384		P02459		Q9TTE1;CON__Q9TTE1		P00743
								P13608-2;P13608		P02465		CON__REFSEQ:XP_001252647		P01017;CON__Q3SZH5
								P15781		P05689		G3MYZ3;CON__REFSEQ:XP_585019		P01035
								P18902		P07456		O46375		P02081;CON__Q3SX09;P06643;P06642
								P23805;P42916		P07589		O62644		P02453;CON__Q862S4
								P33433		P10096		P00743		P02459
								P35445;CON__ENSEMBL:ENSBTAP00000006074		P12799		P01017;CON__Q3SZH5		P02465
								P51186		P13135		P01030		P05689
								P63258;P60712;Q3ZC07;P68138;Q5E9B5;P62739		P13384		P01035		P07456
								P63103		P15781		P02081;CON__Q3SX09;P06643;P06642		P07589
								P68103;Q32PH8		P18902		P02453;CON__Q862S4		P08487
								P80109		P19035		P02459		P10096
								Q03763		P20959		P02465		P12799
								Q27975;Q27965;P0CB32		P22226		P05689		P13135
								Q27971		P23805;P42916		P07456		P13384
								Q2KJ63		P24591		P07589		P15467
								Q2TA49		P33433		P08487		P15781
								Q2UVX4;CON__Q2UVX4		P35445;CON__ENSEMBL:ENSBTAP00000006074		P10096		P18902
								Q32KY0		P48616		P12799		P19035
								Q3T0A3		P51186		P13135		P20959
								Q5E956		P53710		P13384		P22226
								Q5E9B1;P19858		P53712		P13608-2;P13608		P23805;P42916
								Q5E9Z2		P55906		P15467		P24591
								Q5NTB3		P63258;P60712;Q3ZC07;P68138;Q5E9B5;P62739		P15781		P33433
								Q6URK6		P62833;P61223		P18902		P35445;CON__ENSEMBL:ENSBTAP00000006074
								Q76LV2		P62803		P19035		P39873
								Q7SIH1;CON__ENSEMBL:ENSBTAP00000024146		P62935;A4FV72		P20959		P48616
								Q8SPJ1		P63103		P22226		P49907
								Q8SPP7		P68103;Q32PH8		P23805;P42916		P51186
										P80109		P24591		P53712
										P81948;Q3ZCJ7;Q2HJB8;Q32KN8;P81947;Q2HJ86		P28783		P55906
										P98140		P33433		P63258;P60712;Q3ZC07;P68138;Q5E9B5;P62739
										Q03763		P35445;CON__ENSEMBL:ENSBTAP00000006074		P68103;Q32PH8
										Q05716		P48035		P81282-2;P81282
										Q05718		P48616		P82943
										Q06805		P49907		P98133
										Q08D91;Q29S21;P05786		P51186		P98140
										Q0VCX1		P53710		Q03763
										Q27971		P53712		Q05716
										Q28017		P55906		Q05718
										Q29RU4		P63258;P60712;Q3ZC07;P68138;Q5E9B5;P62739		Q08DQ0
										Q2HJ49		P62803		Q24K22
										Q2KIV9		P62935;A4FV72		Q27971
										Q2KJ63		P63103		Q28017
										Q2TA49		P68103;Q32PH8		Q29RU4
										Q2TBU0		P80109		Q2HJ49
										Q2UVX4;CON__Q2UVX4		P98133		Q2KIV9
										Q32KY0		P98140		Q2KJ63
										Q32LP0		Q03763		Q2TA49
										Q3B7M5		Q05716		Q2TBU0
										Q3SYV4		Q05718		Q2UVX4;CON__Q2UVX4
										Q3SZI4;P68509;P68252;Q0VC36;P62261		Q08D91;Q29S21;P05786		Q32KY0
										Q3SZJ4		Q08DQ0		Q32LP0
										Q3T0A3		Q24K22		Q3B7M5
										Q5E9F5;Q3ZBY2		Q27971		Q3MHL4
										Q3ZBZ8		Q28017		Q3SWW8
										Q58CZ2		Q29RU4		Q3SYV4
										Q5E956		Q2HJ49		Q3SYW2
										Q5E9B1;P19858		Q2KIV9		Q3SZJ4
										Q5E9E3		Q2KJ63		Q3T0A3
										Q5E9F7		Q2TA49		Q3T124-2;Q3T124
										Q5E9Z2		Q2TBU0		Q5E9F5;Q3ZBY2
										Q5EA01		Q2UVX4;CON__Q2UVX4		Q58CZ2
										Q5NTB3		Q32KY0		Q5E956
										Q6URK6		Q32LP0		Q5E9B1;P19858
										Q76LV2		Q3B7M5		Q5E9E3
										Q7SIH1;CON__ENSEMBL:ENSBTAP00000024146		Q3SWW8		Q5E9F7
										Q8SPJ1		Q3SYV4		Q5E9Z2
										Q8SPP7		Q3SZI4;P68509;P68252;Q0VC36;P62261		Q5EA01
										Q95122		Q3SZJ4		Q5NTB3
												Q3T0A3		Q6URK6
												Q5E9F5;Q3ZBY2		Q76LV2
												Q3ZBZ8		Q7SIH1;CON__ENSEMBL:ENSBTAP00000024146
												Q58CZ2		Q8SPJ1
												Q5E956		Q8SPP7
												Q5E9B1;P19858
												Q5E9E3
												Q5E9F7
												Q5E9Z2
												Q5EA01
												Q5NTB3
												Q7SIH1;CON__ENSEMBL:ENSBTAP00000024146
												Q8SPJ1
												Q8SPP7

## Sheet: table9
Table 9. Hierarchical clustering
Distance: Euclidian
Linkage: Average

## Sheet: 20-total
DMEM	20 Most abundant proteins (based on table 3)															SiO2NPs																							SiO2NPs-ZW
	Intensity DMEM_1	Intensity DMEM_2	Intensity DMEM_3	Average	Majority protein IDs	Fasta headers											Intensity NUAD_1	Intensity NUAD_2	Intensity NUAD_3	Average	Majority protein IDs	Fasta headers																		Intensity ZWD_1	Intensity ZWD_2	Intensity ZWD_3	Average	Majority protein IDs	Fasta headers
	N	N	N	#DIV/0!	T	T											N	N	N	#DIV/0!	T	T																		N	N	N	#DIV/0!	T	T
	25094000000	24220000000	28682000000	2.59987e+10	P02769;CON__P02769	sp|P02769|ALBU_BOVIN Albumin OS=Bos taurus OX=9913 GN=ALB PE=1 SV=4;							Serum albumin				3948600000	3953600000	3507400000	3803200000	Q2UVX4;CON__Q2UVX4	sp|Q2UVX4|CO3_BOVIN Complement C3 OS=Bos taurus OX=9913 GN=C3 PE=1 SV=2;											Complement							628200000	3169700000	3135100000	2311000000	P02769;CON__P02769	sp|P02769|ALBU_BOVIN Albumin OS=Bos taurus OX=9913 GN=ALB PE=1 SV=4;
	3221800000	2029300000	4182400000	3144500000	P34955;CON__P34955	sp|P34955|A1AT_BOVIN Alpha-1-antiproteinase OS=Bos taurus OX=9913 GN=SERPINA1 PE=1 SV=1;							Acute phase				3992600000	907290000	2096100000	2.332e+09	P02081;CON__Q3SX09	sp|P02081|HBBF_BOVIN Hemoglobin fetal subunit beta OS=Bos taurus OX=9913 PE=1 SV=1;											Others							86385000	2264700000	2649500000	1.66686e+09	CON__P00761	Trypsin
	2670300000	1686500000	4464300000	2.94037e+09	P12763;CON__P12763	sp|P12763|FETUA_BOVIN Alpha-2-HS-glycoprotein OS=Bos taurus OX=9913 GN=AHSG PE=1 SV=2;							Others				2518000000	1542400000	1404400000	1821600000	P15497;CON__P15497	sp|P15497|APOA1_BOVIN Apolipoprotein A-I OS=Bos taurus OX=9913 GN=APOA1 PE=1 SV=3;											Apoliprotein							154650000	1313100000	1784100000	1083950000	CON__Q3SX14	Gelsolin
	894690000	2169900000	2720300000	1.9283e+09	CON__Q29443;Q29443;CON__Q0IIK2	;sp|Q29443|TRFE_BOVIN Serotransferrin OS=Bos taurus OX=9913 GN=TF PE=2 SV=1;							Others				1575500000	1442900000	1334100000	1.45083e+09	P02769;CON__P02769	sp|P02769|ALBU_BOVIN Albumin OS=Bos taurus OX=9913 GN=ALB PE=1 SV=4;											Serum albumin							437090000	1055300000	1707100000	1.0665e+09	CON__ENSEMBL:ENSBTAP00000007350	Similar to complement C4-A precursor
	1423500000	1171400000	1438000000	1344300000	Q7SIH1;CON__ENSEMBL:ENSBTAP00000024146	sp|Q7SIH1|A2MG_BOVIN Alpha-2-macroglobulin OS=Bos taurus OX=9913 GN=A2M PE=1 SV=2;							Coagulation				2408800000	581300000	1229600000	1.40657e+09	P01966;CON__P01966	sp|P01966|HBA_BOVIN Hemoglobin subunit alpha OS=Bos taurus OX=9913 GN=HBA PE=1 SV=2;											Others							116120000	186060000	1656200000	6.52793e+08	P02081;CON__Q3SX09	sp|P02081|HBBF_BOVIN Hemoglobin fetal subunit beta OS=Bos taurus OX=9913 PE=1 SV=1;
	938840000	669110000	604650000	7.37533e+08	P02081;CON__Q3SX09	sp|P02081|HBBF_BOVIN Hemoglobin fetal subunit beta OS=Bos taurus OX=9913 PE=1 SV=1;							Others				501590000	813580000	2204200000	1.17312e+09	P34955;CON__P34955	sp|P34955|A1AT_BOVIN Alpha-1-antiproteinase OS=Bos taurus OX=9913 GN=SERPINA1 PE=1 SV=1;											Acute phase							136750000	877380000	726480000	5.80203e+08	P12763;CON__P12763	sp|P12763|FETUA_BOVIN Alpha-2-HS-glycoprotein OS=Bos taurus OX=9913 GN=AHSG PE=1 SV=2;
	674800000	559240000	742230000	6.58757e+08	Q58D62;CON__Q58D62	sp|Q58D62|FETUB_BOVIN Fetuin-B OS=Bos taurus OX=9913 GN=FETUB PE=1 SV=1;							Others				625750000	1442900000	848600000	9.72417e+08	CON__Q3SX14	Gelsolin											Tissue leakage							305740000	244740000	979200000	5.09893e+08	P15497;CON__P15497	sp|P15497|APOA1_BOVIN Apolipoprotein A-I OS=Bos taurus OX=9913 GN=APOA1 PE=1 SV=3;
	645150000	517540000	557870000	573520000	Q3SZ57;CON__Q3SZ57	sp|Q3SZ57|FETA_BOVIN Alpha-fetoprotein OS=Bos taurus OX=9913 GN=AFP PE=2 SV=1;							Others				1042100000	339130000	674210000	6.85147e+08	P12763;CON__P12763	sp|P12763|FETUA_BOVIN Alpha-2-HS-glycoprotein OS=Bos taurus OX=9913 GN=AHSG PE=1 SV=2;											Others							84381000	344440000	834540000	4.2112e+08	Q2UVX4;CON__Q2UVX4	sp|Q2UVX4|CO3_BOVIN Complement C3 OS=Bos taurus OX=9913 GN=C3 PE=1 SV=2;
	397110000	356120000	521530000	424920000	Q3MHN5;CON__Q3MHN5	sp|Q3MHN5|VTDB_BOVIN Vitamin D-binding protein OS=Bos taurus OX=9913 GN=GC PE=2 SV=1;							Others				914620000	671590000	441620000	6.75943e+08	CON__ENSEMBL:ENSBTAP00000007350	Similar to complement C4-A precursor											Complement							34151000	837180000	311180000	3.9417e+08	CON__Q2KJ62	Methanethiol oxidase
	395220000	251790000	458600000	3.68537e+08	Q2UVX4;CON__Q2UVX4	sp|Q2UVX4|CO3_BOVIN Complement C3 OS=Bos taurus OX=9913 GN=C3 PE=1 SV=2;							Complement				782000000	751250000	418610000	650620000	CON__P00761	Trypsin											Others							123620000	261460000	628750000	3.37943e+08	P34955;CON__P34955	sp|P34955|A1AT_BOVIN Alpha-1-antiproteinase OS=Bos taurus OX=9913 GN=SERPINA1 PE=1 SV=1;
	612010000	228520000	232030000	357520000	P01966;CON__P01966	sp|P01966|HBA_BOVIN Hemoglobin subunit alpha OS=Bos taurus OX=9913 GN=HBA PE=1 SV=2;							Others				776850000	234530000	559090000	523490000	CON__Q3KUS7;P81187	;sp|P81187|CFAB_BOVIN Complement factor B OS=Bos taurus OX=9913 GN=CFB PE=1 SV=2											Complement							99372000	286050000	580030000	3.21817e+08	P01966;CON__P01966	sp|P01966|HBA_BOVIN Hemoglobin subunit alpha OS=Bos taurus OX=9913 GN=HBA PE=1 SV=2;
	218580000	242050000	419500000	2.93377e+08	P15497;CON__P15497	sp|P15497|APOA1_BOVIN Apolipoprotein A-I OS=Bos taurus OX=9913 GN=APOA1 PE=1 SV=3;							Apoliprotein				522550000	469400000	515230000	5.02393e+08	Q7SIH1;CON__ENSEMBL:ENSBTAP00000024146	sp|Q7SIH1|A2MG_BOVIN Alpha-2-macroglobulin OS=Bos taurus OX=9913 GN=A2M PE=1 SV=2;											Acute phase							80751000	577200000	253590000	303847000	CON__ENSEMBL:ENSBTAP00000032840
	172840000	144820000	299800000	205820000	CON__P00761	Trypsin							Others				356110000	316100000	235840000	3.02683e+08	CON__Q9TRI1	Inter-alpha-trypsin inhibitor heavy chain H2											Others							112280000	365020000	321800000	2.66367e+08	Q28085;CON__Q28085	sp|Q28085|CFAH_BOVIN Complement factor H OS=Bos taurus OX=9913 GN=CFH PE=1 SV=3;
	179390000	145720000	217600000	1.80903e+08	CON__Q9TRI1	Inter-alpha-trypsin inhibitor heavy chain H2							Others				403350000	64846000	335260000	2.67819e+08	Q3SZ57;CON__Q3SZ57	sp|Q3SZ57|FETA_BOVIN Alpha-fetoprotein OS=Bos taurus OX=9913 GN=AFP PE=2 SV=1;											Others							79372000	218390000	364130000	2.20631e+08	Q2KIS7;CON__Q2KIS7	sp|Q2KIS7|TETN_BOVIN Tetranectin OS=Bos taurus OX=9913 GN=CLEC3B PE=2 SV=1;
	144000000	141470000	190620000	1.58697e+08	Q3SZV7;CON__Q3SZV7	sp|Q3SZV7|HEMO_BOVIN Hemopexin OS=Bos taurus OX=9913 GN=HPX PE=2 SV=1;							Others				235830000	331690000	187120000	2.51547e+08	P06868;CON__P06868	sp|P06868|PLMN_BOVIN Plasminogen OS=Bos taurus OX=9913 GN=PLG PE=1 SV=2;											Coagulation							34208000	176000000	247430000	152546000	CON__Q3KUS7;P81187	;sp|P81187|CFAB_BOVIN Complement factor B OS=Bos taurus OX=9913 GN=CFB PE=1 SV=2
	82345000	136930000	199630000	139635000	CON__Q2KJ62	Methanethiol oxidase							Others				183670000	171130000	280360000	211720000	Q3T052;CON__Q3T052	sp|Q3T052|ITIH4_BOVIN Inter-alpha-trypsin inhibitor heavy chain H4 OS=Bos taurus OX=9913 GN=ITIH4 PE=1 SV=1;											Others							28634000	222790000	154790000	1.35405e+08	Q7SIH1;CON__ENSEMBL:ENSBTAP00000024146	sp|Q7SIH1|A2MG_BOVIN Alpha-2-macroglobulin OS=Bos taurus OX=9913 GN=A2M PE=1 SV=2;
	171500000	85893000	143380000	133591000	Q9TTE1;CON__Q9TTE1	sp|Q9TTE1|SPA31_BOVIN Serpin A3-1 OS=Bos taurus OX=9913 GN=SERPINA3-1 PE=1 SV=3;							Acute phase				224460000	68810000	297500000	1.96923e+08	Q58D62;CON__Q58D62	sp|Q58D62|FETUB_BOVIN Fetuin-B OS=Bos taurus OX=9913 GN=FETUB PE=1 SV=1;											Others							29049000	122060000	238380000	1.2983e+08	CON__P02768-1	Albumin
	90284000	66232000	98476000	8.49973e+07	P41361;CON__P41361	sp|P41361|ANT3_BOVIN Antithrombin-III OS=Bos taurus OX=9913 GN=SERPINC1 PE=1 SV=2;							Coagulation				260960000	75932000	215400000	1.84097e+08	P63258;P60712;Q3ZC07;P68138;Q5E9B5;P62739	sp|P63258|ACTG_BOVIN Actin, cytoplasmic 2 OS=Bos taurus OX=9913 GN=ACTG1 PE=1 SV=1;sp|P60712|ACTB_BOVIN Actin, cytoplasmic 1 OS=Bos taurus OX=9913 GN=ACTB PE=1 SV=1;sp|Q3ZC07|ACTC_BOVIN Actin, alpha cardiac muscle 1 OS=Bos taurus OX=9913 GN=ACTC1 PE=2 SV=1											Tissue leakage							39952000	143150000	158300000	1.13801e+08	CON__Q28194	Thrombospondin-1
	53658000	87451000	70155000	7.04213e+07	CON__ENSEMBL:ENSBTAP00000007350	Similar to complement C4-A precursor							Complement				251700000	187910000	80810000	1.73473e+08	Q28085;CON__Q28085	sp|Q28085|CFAH_BOVIN Complement factor H OS=Bos taurus OX=9913 GN=CFH PE=1 SV=3;											Complement							17896000	108490000	181570000	102652000	P06868;CON__P06868	sp|P06868|PLMN_BOVIN Plasminogen OS=Bos taurus OX=9913 GN=PLG PE=1 SV=2;
	57652000	46570000	86717000	6.36463e+07	P68103;Q32PH8	sp|P68103|EF1A1_BOVIN Elongation factor 1-alpha 1 OS=Bos taurus OX=9913 GN=EEF1A1 PE=1 SV=1;sp|Q32PH8|EF1A2_BOVIN Elongation factor 1-alpha 2 OS=Bos taurus OX=9913 GN=EEF1A2 PE=2 SV=1							Others				143510000	220580000	97666000	1.53919e+08	CON__ENSEMBL:ENSBTAP00000032840												Others										9.27893e+07	Q95121;CON__Q95121	Pigment epithelium-derived factor
Total				3.9808e+10		Percentage in relation to the number of different proteins.										Total				1.77395e+10		Percentage in relation to the number of different proteins.																	Total				1.08641e+10		Percentage in relation to the number of different proteins.
						Complement	10	%														Complement	20	%																					Complement	20	%
						Coagulation	10	%														Coagulation	5	%																					Coagulation	10	%
						Acute phase	10	%														Acute phase	10	%																					Acute phase	15	%
						Tissue leakage	0	%														Tissue leakage	10	%																					Tissue leakage	10	%
						Serum albumin	5	%														Serum albumin	5	%																					Serum albumin	10	%
						Apoliprotein	5	%														Apoliprotein	5	%																					Apoliprotein	5	%
						Others	60	%														Others	45	%																					Others	30	%
						Percentage in relation to the total intensity of the 20 proteins.		%														Percentage in relation to the total intensity of the 20 proteins.		%																					Percentage in relation to the total intensity of the 20 proteins.		%
						Complement	438958000	1.10269														Complement	5.17611e+09	29.1784																					Complement	1640163000	15.0971
						Coagulation	1.4293e+09	3.59048														Coagulation	2.51547e+08	1.418																					Coagulation	2.16453e+08	1.99236
						Acute phase	3278091000	8.23475														Acute phase	1.67552e+09	9.44511																					Acute phase	5.66137e+08	5.21108
						Tissue leakage	0	0														Tissue leakage	1156514000	6.51942																					Tissue leakage	1.30458e+09	12.0082
						Serum albumin	2.59987e+10	65.3101														Serum albumin	1.45083e+09	8.17854																					Serum albumin	2.44083e+09	22.4669
						Apoliprotein	2.93377e+08	0.736979														Apoliprotein	1821600000	10.2686																					Apoliprotein	5.09893e+08	4.69337
						Others	8.36961e+09	21.025														Others	6.20739e+09	34.9919																					Others	4.18606e+09	38.5311

[truncated: 1 more sheets: Table-SI]
