# Supplementary material for: Dual-functionalized architecture enables stable and tumor cell-specific SiO2NPs in complex biological fluids
Source: Beilstein J Nanotechnol. 2024 Oct 7;15:1238–52. doi: 10.3762/bjnano.15.100 (PMC11472657; doi:10.3762/bjnano.15.100)
Supplement: File 3 — Mass spectrometry proteomic data (raw and processed data, plasma human). [file Beilstein_J_Nanotechnol-15-1238-s003.xlsx]

## Sheet: table1
Table 1. Proteins identified in 12 samples - complete (LFQ intensity, intensity, msmscount)
LFQ intensity Plasma1	LFQ intensity Plasma2	LFQ intensity Plasma3	LFQ intensity NUAP1	LFQ intensity NUAP2	LFQ intensity NUAP3	LFQ intensity ZFP1	LFQ intensity ZFP2	LFQ intensity ZFP3	LFQ intensity ZWP1	LFQ intensity ZWP2	LFQ intensity ZWP3	Only identified by site	Reverse	Potential contaminant	Peptides	Razor + unique peptides	Unique peptides	Sequence coverage [%]	Unique + razor sequence coverage [%]	Unique sequence coverage [%]	Mol. weight [kDa]	Q-value	Score	Intensity	MS/MS count	Intensity Plasma1	Intensity Plasma2	Intensity Plasma3	Intensity NUAP1	Intensity NUAP2	Intensity NUAP3	Intensity ZFP1	Intensity ZFP2	Intensity ZFP3	Intensity ZWP1	Intensity ZWP2	Intensity ZWP3	MS/MS count Plasma1	MS/MS count Plasma2	MS/MS count Plasma3	MS/MS count NUAP1	MS/MS count NUAP2	MS/MS count NUAP3	MS/MS count ZFP1	MS/MS count ZFP2	MS/MS count ZFP3	MS/MS count ZWP1	MS/MS count ZWP2	MS/MS count ZWP3
#!{Type}E	E	E	E	E	E	E	E	E	E	E	E	C	C	C	N	N	N	N	N	N	N	N	N	N	N	N	N	N	N	N	N	N	N	N	N	N	N	N	N	N	N	N	N	N	N	N	N	N	N
454340000	907369984	286940000	5052200	6082100	936160	2341600	761030	483770	714050	1497000	505630				25	25	25	61.7	61.7	61.7	46.708	0	323.31	2121200000	84	473680000	863930000	717700000	8373300	10076000	3632900	4405300	13647000	5756900	4313800	10399000	5290000	22	26	30	2	2	0	0	1	0	1	0	0
34951000	6915000	27678000	3807100	2377100	1657100	5669600	3755800	6838000	7529700	5782200	8739100				1	1	1	7.8	7.8	7.8	12.586	0	6.2754	139680000	2	23136000	14040000	26096000	2698200	1945500	718470	8398200	4831900	13440000	15980000	10175000	18223000	1	0	1	0	0	0	0	0	0	0	0	0
0	0	0	675430	0	873490	3302700	0	0	0	0	0				1	1	1	8.7	8.7	8.7	12.441	0	6.2085	4558800	2	0	0	0	431140	0	517020	3610600	0	0	0	0	0	0	0	0	0	0	1	1	0	0	0	0	0
14120000	7109000	15728000	3759200	0	3106900	1560000	1956000	2976100	2688700	1153100	3712900				1	1	1	13.9	13.9	13.9	12.332	0	90.908	68824000	3	10964000	15743000	17395000	1863200	0	2277600	1678800	2422200	4799200	4313100	1319800	6048900	1	0	1	1	0	0	0	0	0	0	0	0
0	0	0	0	0	0	0	0	516760	643790	1056700	0				1	1	1	9.3	9.3	9.3	12.891	0	6.3172	2922200	1	0	0	0	0	0	0	0	0	630440	1006900	1284900	0	0	0	0	0	0	0	0	0	0	0	1	0
0	0	0	0	0	0	0	0	0	0	0	1666500	+			2	1	1	18.8	9.4	9.4	12.874	1	-2	16386000	0	0	0	0	0	0	0	1761700	1209300	1473900	8427700	1447800	2065700	0	0	0	0	0	0	0	0	0	0	0	0
0	0	0	0	29540	0	33850	39079	32466	33017	241190	31979				1	1	1	11.1	11.1	11.1	13.012	0	6.5797	542560	1	0	0	0	0	31323	0	48196	68552	53569	57009	235140	48775	0	0	0	0	0	0	0	0	0	0	1	0
0	0	0	0	0	0	0	0	0	601040	0	0				1	1	1	7.8	7.8	7.8	12.534	0	7.0244	816890	1	0	0	0	0	0	0	0	0	0	816890	0	0	0	0	0	0	0	0	0	0	0	1	0	0
107380000	45702000	89125000	159590	0	159330	0	0	0	0	0	0				9	9	9	88.7	88.7	88.7	12.633	0	199.9	311470000	52	78972000	133640000	98629000	123930	0	99485	0	0	0	0	0	0	14	17	20	1	0	0	0	0	0	0	0	0
0	0	0	0	0	0	0	0	0	0	0	0	+			1	1	1	3.9	3.9	3.9	35.904	1	-2	0	1	0	0	0	0	0	0	0	0	0	0	0	0	0	0	0	0	0	1	0	0	0	0	0	0
698920	0	0	0	0	0	0	0	979720	922800	706920	0				1	1	1	5.1	5.1	5.1	18.118	0	6.8748	4204800	1	551470	0	0	0	0	0	0	0	1431300	1306600	915500	0	0	0	0	0	0	0	0	0	0	0	1	0
3165600	0	0	0	0	0	5818400	6237800	8817200	21866000	7897900	8721600				7	7	7	12.8	12.8	12.8	75.905	0	119.34	79427000	19	975830	0	0	0	0	0	6791700	8084100	14644000	26940000	8349600	13642000	0	0	0	0	0	0	3	3	2	5	3	3
0	0	0	1189700	0	2902900	58048	121930	49623	30274	50726	0	+			1	1	1	1	1	1	122.91	1	-2	3156700	2	0	0	0	664520	0	1503600	149050	484170	142330	69791	143220	0	0	0	0	1	0	1	0	0	0	0	0	0
3838700	7293600	9531900	83035000	168910000	242710000	52386000	208080000	90119000	26841000	79714000	32842000				3	3	3	20.2	20.2	20.2	23.353	0	22.462	970690000	17	2050300	5285800	7251400	52548000	164790000	150820000	58315000	227180000	123280000	35936000	100150000	43084000	1	1	1	3	3	2	0	0	2	1	1	2
0	6141500	0	0	0	0	0	0	0	0	0	0	+			1	1	1	12.1	12.1	12.1	11.576	1	-2	8333200	1	0	8333200	0	0	0	0	0	0	0	0	0	0	0	1	0	0	0	0	0	0	0	0	0	0
0	0	0	3464900	1579800	0	0	1610500	2197000	8828100	6864600	6009500				4	4	4	1.9	1.9	1.9	252.23	0	45.333	37830000	8	0	0	0	1308800	631840	0	0	2723400	576510	13497000	9513100	9578400	0	0	0	0	1	1	0	1	0	1	3	1
424969984	161640000	143650000	286740000	382409984	146150000	347400000	326950016	454040000	814830016	466329984	476209984				13	13	6	45.6	45.6	26.1	43.911	0	323.31	5029200000	207	199340000	103100000	99828000	136850000	424240000	210220000	511780000	581980000	767060000	531960000	720050000	742780000	9	5	4	14	17	9	25	21	19	32	24	28
0	0	0	0	0	0	0	0	0	0	0	0				1	1	1	3	3	3	47.428	0	6.4303	0	1	0	0	0	0	0	0	0	0	0	0	0	0	0	0	0	0	0	0	0	0	0	1	0	0
0	0	0	0	0	0	0	0	114910	210080	0	0				1	1	1	9.4	9.4	9.4	13.508	0	7.5957	437300	1	0	0	0	0	0	0	0	0	151770	285520	0	0	0	0	0	0	0	0	0	0	0	1	0	0
0	0	227580	0	0	0	1697300	0	393310	0	750700	368270				2	1	1	16.8	10.9	10.9	12.926	0	7.7281	4205800	1	0	0	182820	0	0	0	1304000	0	506360	0	1796000	416610	0	0	0	0	0	0	1	0	0	0	0	0
2377300	0	0	0	0	0	0	0	0	633850	1103500	0				3	2	2	28.2	18.8	18.8	12.839	0	11.025	4593500	2	2691600	0	0	0	0	0	0	0	0	1336200	565680	0	1	0	0	0	0	0	0	0	0	1	0	0
18255000	17977000	19846000	5426800	8711200	8436900	11098000	24041000	10066000	9783700	7946100	12898000				6	2	2	39.5	12.6	12.6	23.15	0	37.884	185370000	21	17175000	24947000	34820000	3331100	7814800	5040000	18131000	28481000	12824000	15769000	1626200	15408000	3	5	4	1	1	2	1	1	1	1	1	0
1756100	0	1257800	0	0	0	2819600	5626000	0	0	0	3768600				2	1	1	30.6	11.2	11.2	10.657	0	14.107	17849000	4	1655800	0	1759000	0	0	0	3403400	6444200	0	0	0	4586600	0	1	1	0	0	0	0	1	0	0	0	1
0	0	0	0	0	0	0	981270	1571400	1392900	1393700	1490400				2	2	2	21.6	21.6	21.6	12.515	0	11.958	12649000	2	1083000	1561000	1264200	0	0	0	0	1233600	2195900	1775400	1681900	1853900	0	1	0	0	0	0	0	1	0	0	0	0
0	0	0	0	0	0	12474000	2746000	0	7699400	3931300	3009900				2	2	2	23.9	23.9	23.9	12.82	0	70.159	36787000	4	0	0	0	0	0	0	11636000	2551700	0	15175000	4313800	3111300	0	0	0	0	0	0	1	0	1	1	1	0
0	0	0	0	0	0	0	0	0	0	0	0	+			1	1	1	9.5	9.5	9.5	12.758	1	-2	0	1	0	0	0	0	0	0	0	0	0	0	0	0	0	0	1	0	0	0	0	0	0	0	0	0
0	0	0	0	189860	0	738690	702310	251340	708120	920070	0				1	1	1	9.4	9.4	9.4	12.772	0	11.001	4281600	6	0	0	0	0	177120	0	807550	819310	331980	962430	1183200	0	0	0	0	0	0	0	1	1	1	1	1	1
0	0	0	34872000	30679000	43510000	30655000	20601000	29321000	28799000	19940000	22022000				1	1	1	7.8	7.8	7.8	12.943	0	7.0232	260920000	2	0	0	0	22821000	27523000	29493000	32214000	18939000	36409000	36469000	27632000	29416000	0	0	0	0	0	0	0	0	0	0	1	1
0	0	0	0	0	0	2872400	2426700	1450300	4889400	3900100	1832400				1	1	1	13	13	13	12.537	0	12.989	21802000	4	0	0	0	0	0	0	3104100	3019400	1893500	6568800	4957800	2258300	0	0	0	0	0	0	1	0	1	1	1	0
39463000	23312000	30003000	18320000	8647900	14244000	27774000	21644000	22694000	92263000	9192500	57201000				21	21	21	18.5	18.5	18.5	187.67	0	259.7	446180000	47	43597000	32356000	36365000	6496600	7179600	4893000	21363000	19014000	28545000	139200000	12906000	94263000	2	1	5	3	4	2	5	3	2	8	3	9
0	0	0	0	0	0	0	0	0	0	0	992100	+			1	1	1	9.4	9.4	9.4	12.822	1	-2	10060000	0	0	0	0	0	1140500	0	581440	1282800	1362500	1973900	2489000	1229800	0	0	0	0	0	0	0	0	0	0	0	0
2560900	2404900	2287400	5615800	9381700	3872700	5509000	8041600	22200000	20966000	14279000	11857000				4	4	3	32.5	32.5	23.1	12.965	0	82.169	127440000	16	3065600	3181900	4075700	4258800	8136200	4076100	16255000	10427000	15745000	30631000	14916000	12667000	0	1	0	1	1	0	1	1	2	4	2	3
0	0	0	0	0	0	3958000	3654900	4548700	4758000	2123800	4840200				1	1	1	12.6	12.6	12.6	11.603	0	6.8344	29945000	1	0	0	0	0	0	0	4377700	3983600	6985600	7865200	1482600	5250500	0	0	0	0	0	0	0	0	0	0	0	1
4631000	2110400	3888600	19658000	13122000	18337000	12434000	6117300	14150000	18519000	8916500	33378000				3	3	3	14.5	14.5	14.5	35.116	0	56.634	168600000	7	2869100	2630600	3284700	11162000	9839300	10948000	12346000	7347900	20154000	27744000	9227700	51045000	0	1	0	3	1	0	0	1	1	0	0	0
37496000	3266200	5349200	5485600	22778000	7872600	10895000	29572000	13708000	3863500	17375000	13274000			+	11	11	9	16.7	16.7	14	59.51	0	278.33	191930000	29	31094000	2497500	2911700	1808700	17623000	3233500	16817000	41076000	21588000	5612900	25934000	21736000	5	1	1	1	4	1	0	6	2	2	3	3
5954300	4773900	12573000	38491000	77849000	57855000	47803000	46268000	36882000	68912000	67804000	40826000				13	7	5	47.2	32.6	25.2	41.215	0	213.56	560210000	51	29196000	18547000	15631000	37038000	61207000	19262000	44869000	48855000	35197000	92464000	106030000	51906000	1	1	2	3	5	5	6	7	3	6	7	5
144540000	188940000	139680000	17363000	9363700	21733000	15160000	18838000	12258000	61508000	15528000	32194000				10	10	10	31.4	31.4	31.4	42.848	0	156.9	843970000	24	123370000	243550000	172120000	6619300	4716800	4509000	43473000	22616000	26614000	93607000	25255000	77526000	2	7	7	0	0	0	1	2	1	2	1	1
16077000	9916000	8489800	1033900	1440600	871020	1235400	1713500	3019200	8695600	4550100	6105700				10	4	3	35.4	18.2	14.7	43.805	0	50.347	75077000	25	20889000	10583000	9545200	237680	4031100	212550	5300100	1679200	1647200	5406300	7360500	8184400	7	1	1	1	0	1	2	2	1	4	3	2
818700	262660	0	1056200	1883000	171120	0	0	0	597630	0	682780				2	2	2	9.8	9.8	9.8	23.845	0	13.351	6047900	2	1827900	255280	0	87306	1056600	5536.4	0	0	0	1323800	0	1491600	0	0	0	1	0	0	0	0	0	0	0	1
0	0	0	106210	0	0	0	0	0	20000	0	0				3	1	1	29.9	11.2	11.2	13.842	0	6.4495	94979	1	0	0	0	67796	0	0	0	0	0	27183	0	0	0	0	0	1	0	0	0	0	0	0	0	0
347040	330370	642780	670190	2293000	0	17757000	18688000	13024000	94619000	30031000	20930000				6	6	6	11.3	11.3	11.3	80.173	0	97.299	251690000	16	270240	349070	417460	568480	2021300	0	23211000	23212000	20145000	89500000	33998000	57992000	1	1	0	0	0	0	2	0	2	5	1	4
0	1385400	1645600	601040	1299100	0	975300	0	997170	2034200	475610	712540				3	3	1	36.6	36.6	10.9	11.167	0	19.037	12770000	3	0	1595100	2362600	428570	51682	0	1868900	0	804440	4271800	540660	846540	0	0	0	0	0	0	0	0	0	1	0	2
64150000	67371000	50028000	14831000	10950000	11073000	4919600	2586500	3705400	32210000	6129900	29411000				14	14	14	31.3	31.3	31.3	53.213	0	323.31	366650000	51	61852000	99528000	92076000	5589900	5567800	3696400	4630800	1744500	3591300	41728000	7883300	38758000	8	8	8	2	2	2	4	1	1	8	2	5
0	0	0	0	0	0	0	0	20913	0	0	0	+			1	1	1	8.3	8.3	8.3	11.802	1	-2	27623	0	0	0	0	0	0	0	0	0	27623	0	0	0	0	0	0	0	0	0	0	0	0	0	0	0
957390	1157300	0	0	881720	0	2416700	2639900	2927200	0	2845200	13341000				1	1	1	0.9	0.9	0.9	145.62	0	7.9581	33301000	2	831290	1499000	0	0	685400	0	3644700	2400900	5870100	0	5476800	12893000	0	0	0	0	0	0	0	1	0	0	0	1
10199000	13917000	12112000	6940200	2970300	3726400	1902200	0	2447500	1445800	0	1908000				6	6	6	30.2	30.2	30.2	30.67	0	59.978	71612000	15	14242000	24965000	25949000	697300	1407500	764600	397580	0	1085700	932250	0	1171400	2	1	2	0	1	2	0	1	3	2	0	1
0	2330100	0	0	0	0	0	0	0	0	0	0	+			1	1	1	2.9	2.9	2.9	87.523	1	-2	3161700	0	0	3161700	0	0	0	0	0	0	0	0	0	0	0	0	0	0	0	0	0	0	0	0	0	0
0	0	0	363870016	94397000	249490000	41989000	54606000	46976000	22962000	15614000	15390000				1	1	1	1.5	1.5	1.5	52.991	0	8.6	691200000	8	0	0	0	274370000	26777000	152530000	46108000	80837000	77055000	5923900	3351500	24251000	0	0	0	2	0	2	2	1	0	0	0	1
11915000	14763000	19512000	13312000	7562200	6464000	10370000	6902700	13777000	9152200	7525600	12235000				1	1	1	13.7	13.7	13.7	12.815	0	127.93	152890000	11	11684000	18278000	26172000	8623300	7076800	4660300	11310000	6050400	20341000	12132000	10145000	16420000	0	0	0	2	0	1	2	1	1	1	1	2
0	0	0	976500	765500	0	585190	640280	0	0	0	0	+			1	1	1	6.2	6.2	6.2	24.988	1	-2	2730500	3	0	0	0	583180	838890	0	574490	733910	0	0	0	0	0	0	0	1	0	0	0	0	0	1	1	0
0	144480	0	444210	707070	611040	189990	238740	158010	89274	0	0	+			1	1	1	1.8	1.8	1.8	42.974	1	-2	2114300	1	0	59154	0	263040	974020	461530	126260	138860	68871	22622	0	0	0	0	0	0	0	0	1	0	0	0	0	0
1404600	0	0	0	0	0	0	0	0	0	0	0	+			1	1	1	33	33	33	9.5729	1	-2	1404600	0	1404600	0	0	0	0	0	0	0	0	0	0	0	0	0	0	0	0	0	0	0	0	0	0	0
0	0	0	0	0	0	0	0	0	0	376760	0	+			1	1	1	23.1	23.1	23.1	8.6497	1	-2	484500	1	0	0	0	0	0	0	0	0	0	0	484500	0	0	0	0	0	0	0	0	0	0	0	1	0
5484000	3481300	5997100	0	0	1584000	2378000	1734600	2203800	4388300	2576000	1865300				1	1	1	17.1	17.1	17.1	8.1675	0	10.268	38749000	10	5680900	4717700	8531300	0	0	936380	2596400	2021000	2690600	5956800	3308600	2309200	0	1	1	1	1	1	1	1	0	1	1	1
2609300	1282000	1691100	9490100	5335000	27137000	12919000	8726600	5888900	3340300	4538600	5345200				6	6	6	26.5	26.5	26.5	24.158	0	106.34	96244000	16	2600200	1578500	2418900	7287100	8898300	5025500	8775900	12127000	12264000	8672000	14978000	11618000	0	0	1	2	1	1	1	3	2	1	1	3
0	126820	0	895470	1401400	22366000	506010	0	513940	0	0	0	+			15	1	1	70.6	6.7	6.7	13.546	1	-2	18658000	1	0	70929	0	1663600	5955000	8924400	909800	0	1133900	0	0	0	0	0	0	0	0	1	0	0	0	0	0	0
0	0	0	0	0	0	0	0	0	0	0	0	+			1	1	1	20	20	20	10.263	1	-2	0	1	0	0	0	0	0	0	0	0	0	0	0	0	0	0	1	0	0	0	0	0	0	0	0	0
0	0	0	5890600	4322600	4721500	17053000	41094000	0	13818000	16484000	20179000				1	1	1	2	2	2	76.736	0	7.139	147580000	1	0	0	0	1809100	1423700	1077700	25967000	26346000	0	21195000	28540000	41226000	0	0	0	0	0	0	0	1	0	0	0	0
77077	0	0	0	32202000	152730	118080	3532400	185770	358950	920920	157430			+	6	2	0	9.9	3	0	63.165	0	12.252	40397000	3	42670	0	0	0	14456000	780790	3893800	9569900	716400	1122300	6989500	2825500	0	0	0	0	1	0	0	2	0	0	0	0
285760000	180540000	271380000	212060000	250660000	144730000	361960000	215750000	308449984	315460000	514400000	251150000			+	4	4	4	25.1	25.1	25.1	24.409	0	102.7	4012700000	32	34005000	176350000	54274000	54653000	164500000	41248000	411050000	560130000	480590000	751490000	803710000	480700000	2	2	2	1	4	2	3	4	3	2	4	3
2187800	840520	0	746530	0	0	0	0	0	0	0	0			+	4	4	2	36.6	36.6	19	15.184	0	26.552	4230900	8	2644900	1556800	0	29247	0	0	0	0	0	0	0	0	6	1	1	0	0	0	0	0	0	0	0	0
298810	0	0	314520	491140	0	397510	0	0	0	373730	251140			+	3	1	1	6.1	2.8	2.8	51.621	0	6.5521	2159300	1	235750	0	0	192550	594170	0	456120	0	0	0	474260	206430	0	0	0	1	0	0	0	0	0	0	0	0
0	0	0	12729000	2124900	2525300	1682400	1168400	970130	0	0	0			+	5	1	1	9.3	2.6	2.6	56.44	0	8.9873	18034000	3	0	0	0	7083800	1728200	4200900	2339200	1444600	1237500	0	0	0	0	0	0	1	1	1	0	0	0	0	0	0
13893000192	21316999168	16184999936	858750016	675020032	311249984	423280000	333430016	183460000	426489984	360900000	235490000			+	57	57	52	79	79	73.9	69.366	0	323.31	68138000000	867	20293000000	23169000000	21484000000	506650000	355030000	94046000	472540000	343740000	251710000	455790000	383540000	329620000	198	197	208	61	45	28	30	25	8	26	22	19
8028400	5244700	3170000	0	0	5250900	3656100	0	8609000	1532300	1872300	5973000			+	12	7	7	20.4	14.2	14.2	69.293	0	45.632	51797000	15	11232000	8348600	7741800	0	0	1715800	890690	393990	8527100	730040	1553900	10663000	5	1	1	1	0	0	0	0	3	1	1	2
1781700	901770	921380	1370700	627630	954560	776200	542610	396700	1022800	590360	1011400			+	4	3	3	18.7	15.3	15.3	38.418	0	38.565	13573000	49	520820	363910	395610	663580	1014800	1433600	1223200	1109400	2756400	398590	365170	3327700	3	6	5	7	4	4	2	0	2	7	4	5
244660	0	0	92075	0	0	49118	0	0	53582	0	0			+	2	1	1	10.9	4.9	4.9	30.276	0	12.334	493780	5	201030	0	0	93750	0	0	79247	0	0	119750	0	0	4	0	0	0	0	0	0	0	0	1	0	0
775360	97720	114090	942970	0	90109	46167	0	0	91472	60667	0			+	2	2	2	7.7	7.7	7.7	46.103	0	18.003	2432000	14	963810	106270	129060	741840	0	155220	27803	0	0	258760	49265	0	7	1	0	4	0	0	0	0	0	2	0	0
0	0	1547000	340030	1325900	1101700	558210	2853000	704500	0	1574600	588750			+	5	5	5	11.9	11.9	11.9	62.129	0	93.126	12007000	15	0	0	1888100	187590	1833400	493800	258490	3306800	2336100	0	1337600	365420	0	0	2	1	1	2	1	2	2	0	2	2
165650	0	0	0	968600	196290	292580	511280	315380	0	778640	185450			+	6	2	2	10.9	5	5	65.865	0	11.095	3514900	2	62719	0	0	0	2000500	52126	28528	374690	300280	0	598640	97441	0	0	0	0	0	0	0	1	0	0	1	0
0	0	0	0	0	0	0	0	0	0	0	0			+	1	1	1	6.2	6.2	6.2	21.653	0	13.799	0	1	0	0	0	0	0	0	0	0	0	0	0	0	0	0	0	0	0	0	0	0	0	1	0	0
2375300	4371500	3493400	2998600	4531900	3807600	2109600	3244400	1243700	1503900	2677800	660350			+	2	1	1	6.1	2.9	2.9	43.017	0	29.25	34643000	2	2271600	4609500	5770700	2056600	5584600	2728800	2078500	2941300	1136700	1555300	3496500	412730	0	1	0	0	0	0	0	1	0	0	0	0
168140	0	0	99511	0	0	26563	0	0	52161	0	0			+	4	2	2	24.9	15.4	15.4	22.06	0	47.333	470810	9	332040	0	0	53928	0	0	24654	0	0	60188	0	0	6	0	0	2	0	0	0	0	0	1	0	0
6479400	668260	2682000	100540000	93629000	109930000	86686000	153700000	268600000	916129984	124160000	742179968				8	8	8	45	45	45	26.459	0	190.9	3218600000	94	2343700	122350	1029800	70167000	57321000	24745000	154320000	117010000	419470000	1022300000	221500000	1128300000	0	0	0	5	4	1	7	10	10	23	12	22
45054000	104310000	104670000	191400	129750	1034300	441750	1185400	0	380770	249060	170730				12	12	12	30.9	30.9	30.9	53.02	0	174.79	326500000	32	79780000	101550000	136880000	108030	107030	326750	1425000	1321400	0	2606200	818930	1577000	4	11	10	1	1	2	0	2	0	1	0	0
201840	0	0	721710	592910	550960	0	0	0	0	0	0	+			1	1	1	11.4	11.4	11.4	10.095	1	-2	1546100	1	242080	0	0	516080	509040	278890	0	0	0	0	0	0	1	0	0	0	0	0	0	0	0	0	0	0
0	0	19129	36083	0	49966	0	293390	140880	0	164300	96103				1	1	1	2.4	2.4	2.4	55.389	0	7.0855	918750	4	0	0	30479	30195	0	42059	0	325230	176820	0	200770	113200	0	0	0	0	0	0	0	1	1	0	1	1
0	0	0	0	0	0	0	0	0	0	0	0	+			1	1	1	8.6	8.6	8.6	18.433	1	-2	0	1	0	0	0	0	0	0	0	0	0	0	0	0	0	0	0	1	0	0	0	0	0	0	0	0
0	0	0	0	0	0	0	0	0	15983000	3869500	2783600				2	2	2	8	8	8	45.147	0	18.295	39082000	3	261420	0	425050	1261200	0	0	4447700	1026100	1567200	21551000	3847700	4694400	0	0	0	0	0	0	0	0	0	2	1	0
0	0	0	0	0	0	0	0	0	0	0	0				1	1	1	2.9	2.9	2.9	50.753	0.0068493	6.159	0	1	0	0	0	0	0	0	0	0	0	0	0	0	0	0	0	0	0	1	0	0	0	0	0	0
20431000	5010700	8089500	1683800	819790	0	2991000	2660800	2593800	0	1999600	1727100				7	7	7	11.5	11.5	11.5	97.712	0	96.809	56470000	11	18588000	9818600	13168000	943980	327010	0	1837200	4307800	4445700	0	2682100	351740	4	3	3	0	0	0	0	0	1	0	0	0
0	0	0	0	0	0	0	0	0	0	0	950210	+			1	1	1	2.1	2.1	2.1	71.049	1	-2	2326900	0	0	0	0	0	0	0	0	0	0	1149100	0	1177900	0	0	0	0	0	0	0	0	0	0	0	0
1867100	2856400	3419200	869110	787210	0	9350900	5876700	2505300	4279700	2455200	1509000			+	7	7	7	14.4	14.4	14.4	65.408	0	102.42	42891000	17	3834600	4990900	5716100	396020	651860	0	10023000	6187900	3578900	3346600	2537900	1627700	0	2	4	0	0	0	3	2	2	2	1	1
0	0	0	3812900	13728000	4587800	11998000	23232000	22844000	5480500	14083000	19731000				1	1	1	5.7	5.7	5.7	14.139	0	6.6598	139910000	5	0	0	0	2337000	11485000	2705900	11762000	24304000	41448000	7690900	16241000	21933000	0	0	0	0	1	0	1	1	0	0	1	1
0	0	123780	598890	774770	0	1547600	0	1080300	1148000	0	0				1	1	1	12.7	12.7	12.7	11.674	0	8.9757	6134900	1	0	0	252030	199830	488770	0	2285400	0	1345500	1563300	0	0	0	0	1	0	0	0	0	0	0	0	0	0
0	0	0	4444700	2224300	4699700	7191800	4828400	5413100	40709000	9910000	9095400				6	6	6	12.1	12.1	12.1	60.04	0	102.26	106330000	8	0	0	0	2770600	1366900	2663600	11756000	7273600	7354100	42768000	11003000	19376000	0	0	0	0	0	0	0	0	1	4	2	1
0	0	0	1392600	1093300	0	593210	1061400	0	0	0	0	+			1	1	1	4.9	4.9	4.9	24.042	1	-2	3846300	2	0	0	0	848120	973070	0	569810	1455300	0	0	0	0	0	0	0	1	1	0	0	0	0	0	0	0
0	0	0	777460	0	0	0	0	0	0	0	0	+			1	1	1	5.4	5.4	5.4	45.395	1	-2	496270	0	0	0	0	496270	0	0	0	0	0	0	0	0	0	0	0	0	0	0	0	0	0	0	0	0
0	0	0	0	0	0	0	0	0	0	0	0	+			1	1	1	28.6	28.6	28.6	6.7056	1	-2	0	1	0	0	0	0	0	0	0	0	0	0	0	0	0	0	0	0	0	0	0	0	0	0	0	1
0	0	0	0	0	0	42959	45816	0	0	0	0				1	1	1	2.2	2.2	2.2	79.696	0	6.3804	100410	1	0	0	0	0	0	0	46964	53449	0	0	0	0	0	0	0	0	0	0	1	0	0	0	0	0
0	0	0	0	0	0	0	0	0	0	0	33928	+			1	1	1	3.7	3.7	3.7	41.334	1	-2	648970	3	0	0	89959	85548	0	0	0	41558	100270	141760	147820	42056	0	2	0	0	0	0	0	0	0	0	0	1
1779800	0	0	13783000	12131000	17851000	38937000	27839000	40626000	124100000	89855000	64672000				14	14	14	23.8	23.8	23.8	76.773	0	281.89	519140000	40	749230	0	0	9043800	12066000	12299000	34998000	46317000	39262000	98661000	188030000	77715000	0	0	0	1	1	2	4	4	5	9	9	5
854670	0	0	0	0	0	0	0	0	0	0	0	+			1	1	1	55	55	55	4.2299	1	-2	854670	1	854670	0	0	0	0	0	0	0	0	0	0	0	1	0	0	0	0	0	0	0	0	0	0	0
0	0	0	0	0	0	0	0	0	0	0	0	+			1	1	1	2.9	2.9	2.9	65.952	1	-2	0	1	0	0	0	0	0	0	0	0	0	0	0	0	1	0	0	0	0	0	0	0	0	0	0	0
346590	243820	487350	0	0	0	0	0	0	0	0	0	+			1	1	1	2.4	2.4	2.4	51.912	1	-2	1400200	1	278060	339110	783070	0	0	0	0	0	0	0	0	0	0	1	0	0	0	0	0	0	0	0	0	0
473740	0	0	0	0	0	0	0	1750800	2741300	2037700	3834800	+			1	1	1	18.7	18.7	18.7	10.766	1	-2	13999000	3	350050	0	0	0	0	0	0	0	2078500	4942400	2355300	4272500	0	0	0	0	0	0	0	0	1	0	1	1
0	4954300	0	19704000	7080400	39593000	22538000	23117000	22696000	16912000	7348500	18059000				2	2	2	28.6	28.6	28.6	8.647	0	12.25	172490000	3	0	1474300	0	13280000	11275000	32213000	22625000	23655000	32630000	3721600	11041000	20577000	0	0	0	0	1	0	0	0	1	0	1	0
0	0	0	0	0	0	0	971020	0	0	0	1281900				2	2	2	4.1	4.1	4.1	66.86	0	12.276	2721800	2	0	0	0	0	0	0	0	1132800	0	0	0	1589000	0	0	0	0	0	0	0	1	0	1	0	0
7305000	3660700	2794700	12285000	11031000	8045600	8900300	9716600	5554600	5372700	0	5704000				4	4	4	17.6	17.6	17.6	43.974	0	82.163	72940000	12	5292100	4572400	6221600	26117000	8728500	288880	134530	156720	10395000	6315400	0	4716800	0	1	1	1	3	2	1	1	0	2	0	0
3588600	2691700	527620	10125000	7959000	8442300	4014500	3034100	4366100	2715800	0	2026400	+			1	1	1	2.6	2.6	2.6	52.941	1	-2	41176000	1	2009100	1533700	913170	10208000	9219500	6581500	2748700	1675400	3928100	1563900	0	794120	0	0	1	0	0	0	0	0	0	0	0	0
645040	0	0	0	0	0	0	0	0	0	0	0	+			1	1	1	6.2	6.2	6.2	45.285	1	-2	645040	1	645040	0	0	0	0	0	0	0	0	0	0	0	1	0	0	0	0	0	0	0	0	0	0	0
204430000	216100000	254570000	2391400	3740900	3196200	742080	871480	306990	686860	673150	636520				18	18	9	51.7	51.7	30	45.205	0	294.47	866770000	35	189990000	224800000	399810000	7416500	9962600	6065200	4745700	4289600	514260	4716900	8297500	6165800	12	10	10	1	2	0	0	0	0	0	0	0
1767000	0	0	3479900	3580200	3230100	8181200	5909700	1220100	3395100	4331300	0				6	6	6	8.9	8.9	8.9	90.568	0	133.29	37933000	10	1172300	166970	169680	1869700	2815400	1391900	11245000	10927000	1400100	1889400	4528200	357760	1	0	0	1	0	0	2	2	1	2	1	0
0	0	3448600	13669000	13662000	9914800	1293500	0	3367700	13561000	4936800	3683400				4	4	4	7	7	7	67.791	0	32.227	67098000	17	0	0	4726100	9203400	14765000	5156000	102740	0	3908100	16765000	6412200	6059100	0	0	0	2	2	1	1	1	2	4	3	1
8462700	80474000	19148000	814120	631180	0	68721	1358500	84324	0	98042	0				15	15	15	45.5	45.5	45.5	52.602	0	253.39	141690000	32	28461000	62789000	45982000	935840	882410	0	20021	2401100	36419	0	184060	0	5	14	11	0	1	0	0	1	0	0	0	0
92640000	93088000	32263000	5164000	0	0	9524300	0	0	0	8088200	0				6	6	6	18.9	18.9	18.9	47.65	0	47.309	299750000	8	77864000	112600000	101110000	2531600	0	0	4215300	0	0	0	1429500	0	3	3	2	0	0	0	0	0	0	0	0	0
125220000	55223000	39744000	16796000	9192600	6581100	21859000	23193000	9689400	11805000	10566000	12481000				21	21	21	20.6	20.6	20.6	163.29	0	243.18	395860000	31	116970000	62914000	75177000	11838000	5805300	3797300	21079000	7309500	11710000	42744000	9266000	27246000	10	6	6	1	0	0	2	2	1	2	0	1
84966000	37826000	50656000	69812000	81315000	63157000	81122000	74496000	72476000	57000000	81097000	56769000				37	37	37	26.5	26.5	26.5	187.15	0	323.31	888010000	132	109200000	28646000	38823000	59571000	59982000	19075000	143010000	63384000	58312000	158550000	82998000	66457000	16	8	6	5	13	9	14	13	6	16	15	11
4719000	6723300	3281200	45443000	72081000	24844000	30811000	57374000	28784000	121740000	73456000	60909000				21	21	3	30.7	30.7	5	71.957	0	323.31	604620000	70	21776000	23452000	18837000	28779000	54816000	14638000	23710000	70524000	56878000	120070000	79302000	91840000	0	1	1	9	8	3	6	9	4	6	11	12
0	3886000	3533600	2703700	0	0	0	0	0	3182700	0	2276000				19	1	1	41.9	3	3	47.883	0	11.02	19306000	1	0	6169900	5355400	1701100	0	0	0	0	0	4145700	0	1933500	0	0	0	1	0	0	0	0	0	0	0	0
5850200	3263300	5103800	0	0	0	0	0	4690800	4833500	1680200	4260800				2	2	2	24.8	24.8	24.8	12.283	0	23.974	38796000	5	5314100	6109000	16629000	0	0	0	0	0	2825800	4035800	1694000	2188100	0	1	1	0	0	0	0	0	0	1	1	1
0	1105600	296440	112080	250340	0	136610	0	187240	0	197220	0				2	2	2	17	17	17	12.042	0	12.236	3002200	3	0	1646700	793600	24592	179300	0	62566	0	142020	0	153400	0	0	3	0	0	0	0	0	0	0	0	0	0
610230016	563449984	432460000	242650000	220110000	204100000	290769984	197950000	298120000	596760000	342400000	331390016				8	8	8	82.2	82.2	82.2	11.765	0	323.31	5042900000	159	728670000	271610000	336040000	124620000	159470000	172160000	379460000	341410000	821520000	771070000	368360000	568540000	17	12	11	12	13	14	14	9	17	15	15	10
62444000	20224000	41898000	38977000	26423000	18792000	37707000	41342000	40104000	123600000	67609000	52148000				11	11	11	30.2	30.2	30.2	49.439	0	157.51	681980000	28	50563000	34882000	41099000	22062000	23121000	8389700	56131000	41529000	80237000	178400000	88969000	56588000	1	1	0	1	0	1	3	3	1	9	5	3
4000199936	4615399936	3723399936	7508199936	6552099840	10757999616	2070800000	1676400000	2425400064	945929984	743640000	1083600000				30	30	29	76.8	76.8	76.8	30.777	0	323.31	43661000000	460	2717100000	4228300000	4343400000	4653600000	6705800000	6608900000	2425600000	3242000000	4373200000	1728800000	1268400000	1366000000	31	44	42	63	65	75	31	28	32	15	17	17
56927000	60016000	69022000	348230016	395990016	493600000	460449984	793990016	687710016	436080000	506409984	566329984				21	21	21	65	65	65	36.154	0	323.31	5438700000	110	30418000	45888000	58011000	208120000	249320000	300150000	637720000	1020800000	749750000	581750000	885120000	671670000	4	5	3	6	8	8	7	8	15	17	11	18
73075000	90057000	43052000	318560000	125590000	403430016	34566000	37572000	45073000	22526000	11138000	19403000				7	7	7	51.9	51.9	51.9	14.914	0	194.02	1041500000	58	78423000	53848000	81549000	141060000	66937000	289260000	46683000	84395000	87084000	50242000	7414500	54614000	5	5	2	11	5	13	7	4	2	2	1	1
347870016	388940000	477830016	5635899904	5039000064	8333400064	1637600000	1611699968	1470599936	689820032	598110016	472889984				36	36	36	66.5	66.5	66.5	69.756	0	323.31	23218000000	324	232640000	198310000	403660000	3999700000	3747800000	4449800000	2883200000	2619600000	1883500000	1305900000	1067000000	426470000	11	12	13	43	47	69	32	27	23	16	16	15
233860000	207180000	292420000	3926000128	3193100032	3236600064	643230016	616720000	632430016	335049984	220860000	206650000				33	33	29	70.1	70.1	63.3	55.928	0	323.31	11584000000	312	112180000	146670000	204930000	2328500000	3047000000	2281700000	1028600000	843850000	662030000	448460000	349460000	130240000	10	9	18	49	59	64	21	19	17	20	15	11
341020000	240310000	182580000	4591799808	3123399936	4095200000	974080000	861580032	633750016	574480000	323740000	242700000				32	32	18	67.3	67.3	49.9	49.496	0	323.31	13200000000	228	222810000	162550000	188410000	2781300000	2669300000	3042000000	1142000000	689130000	987090000	762940000	216210000	336170000	7	6	4	48	40	48	15	13	15	7	14	11
0	0	0	60651000	62587000	69149000	106030000	125860000	168680000	295240000	212100000	240590000				6	6	6	29	29	29	26.016	0	48.495	1687500000	19	0	0	0	9009900	23294000	14343000	80115000	92391000	201460000	597610000	185370000	483940000	0	0	0	0	0	1	3	2	2	6	1	4
7491600	3332500	3909100	42723000	37035000	24489000	111520000	136440000	187260000	1740400000	227660000	582860032				6	6	6	26.1	26.1	26.1	25.773	0	222.65	3812600000	34	2676900	718710	1038100	75904000	49665000	37498000	343770000	205610000	448010000	1230500000	439620000	977610000	0	0	0	3	3	1	4	3	5	6	4	5
4305800	4437400	1034000	653290	0	337050	473390	0	0	0	629990	485640				3	3	3	13	13	13	38.298	0	63.15	15538000	6	3079200	7985500	3618300	118720	0	74356	135940	0	0	0	301950	224370	1	1	1	0	0	1	0	0	0	0	1	1
11295000	7834200	6870900	0	0	0	0	0	0	0	0	0				3	3	3	12.4	12.4	12.4	38.177	0	18.94	32327000	3	10095000	8494200	13737000	0	0	0	0	0	0	0	0	0	2	0	1	0	0	0	0	0	0	0	0	0
7675900	3759600	5782800	31929000	28799000	31592000	15877000	20206000	5355900	10171000	24250000	5495700				12	12	12	6.5	6.5	6.5	239.62	0	148.73	166700000	22	3307400	4406000	11039000	37141000	26835000	23835000	16713000	10306000	7445700	13995000	3606200	8066700	3	1	2	4	3	2	1	1	1	2	1	1
508160	524860	534420	274030	222570	271560	303650	331610	46933	176670	229640	112790				2	2	2	6.5	6.5	6.5	38.999	0	12.545	4029800	3	616100	754560	946430	155730	166600	142460	311110	378890	65680	171660	240690	79860	0	1	0	0	0	0	0	0	1	1	0	0
18422000	38020000	27292000	0	0	0	0	0	0	0	0	0				4	2	2	29.4	20.9	20.9	23.511	0	43.818	112010000	7	7471300	83659000	20883000	0	0	0	0	0	0	0	0	0	1	2	4	0	0	0	0	0	0	0	0	0
11523000	70533000	62957000	7724500	0	6945900	13288000	1789900	1706700	6591800	2800600	2841200				4	4	3	11.7	11.7	8.4	39.34	0	93.893	247660000	7	15583000	103620000	93913000	1944000	0	2053200	6466300	1147600	3963100	11942000	1687500	5340700	2	2	1	0	0	0	0	0	0	1	0	1
521320000	596800000	609190016	10087000	513400	263750	2122700	575020	434610	763820	0	414320				35	35	35	57.3	57.3	57.3	77.063	0	323.31	2231200000	103	501790000	759720000	936580000	6501800	2865900	918070	7396400	3075000	1299500	8036700	0	3005400	31	35	36	1	0	0	0	0	0	0	0	0
15184000	24496000	17849000	0	0	0	0	0	0	0	0	0				4	4	4	11.7	11.7	11.7	51.676	0	39.578	73493000	5	16476000	29285000	27732000	0	0	0	0	0	0	0	0	0	1	3	1	0	0	0	0	0	0	0	0	0
0	0	0	11923000	25987000	18605000	21975000	16941000	32550000	24604000	31581000	46984000				12	12	12	18.9	18.9	18.9	70.108	0	86.086	260210000	20	0	0	0	10483000	10801000	16645000	20378000	17345000	13455000	83512000	26681000	60910000	0	0	0	0	0	0	1	3	4	4	1	7
5300000	5276500	2460900	0	2252200	4309800	6241900	4831000	5355600	6017300	1690800	3196000				2	2	2	4.6	4.6	4.6	54.305	0	18.809	54925000	5	4569400	5872700	4025300	0	2247700	1663900	10814000	5639900	7287500	7447600	1972700	3384500	0	0	1	0	1	0	0	0	0	1	2	0
116550000	19248000	20941000	1783100032	1859800064	1524099968	6052199936	9740600320	3999099904	4028499968	8325000192	4562400256				252	252	248	64	64	63.4	515.6	0	323.31	51351000000	1774	239480000	147540000	225750000	581360000	800620000	380690000	5515400000	7685300000	7958600000	9255100000	8294200000	10268000000	4	0	0	62	77	35	234	306	260	239	284	273
4645600	20148000	10973000	443190016	370329984	306070016	437640000	359860000	445940000	779360000	605750016	918560000				17	17	17	36.6	36.6	36.6	59.578	0	323.31	5347400000	208	10696000	40982000	38551000	282110000	317330000	171510000	541450000	407070000	682470000	940240000	837800000	1077100000	1	2	1	21	15	14	17	22	20	27	35	33
7577100	10412000	10334000	0	0	7457800	0	0	0	0	0	0				5	5	5	13.3	13.3	13.3	54.253	0	58.263	45372000	8	7259200	22370000	14747000	0	0	995010	0	0	0	0	0	0	2	3	3	0	0	0	0	0	0	0	0	0
32528000	3937300	22045000	13116000	35316000	14047000	24514000	27776000	24662000	5490400	18225000	17832000			+	17	17	11	28.4	28.4	19.1	66.038	0	318.02	269800000	47	26045000	3160000	29324000	4094400	47541000	3885100	17931000	59411000	26656000	9399700	20863000	21494000	4	0	5	2	6	4	4	8	3	1	4	6
0	0	0	4780500	4366800	5934900	3137400	4294700	3565100	1922800	7364000	5754400				3	3	3	8.6	8.6	8.6	45.674	0	21.67	40041000	5	0	0	0	4967200	75346	5397900	3927000	5391000	3636400	729450	7056600	8860500	0	0	0	0	0	1	1	0	0	1	2	0
0	515540	0	0	0	0	0	0	0	1912700	0	0				1	1	1	1.8	1.8	1.8	57.07	0	12.789	3299200	3	0	699520	0	0	0	0	0	0	0	2599700	0	0	0	0	0	0	0	0	1	1	0	1	0	0
387420	816460	276700	226330	1209300	477670	406960	619780	1820800	328670	2121600	771650				3	3	3	29.8	29.8	29.8	13.38	0	23.677	11922000	8	1133700	147040	1748500	26685	149750	60638	92409	163360	2049600	2242800	1752100	2355000	1	1	1	0	1	0	0	0	1	1	1	1
16089000	14360000	8060200	75729000	87783000	66194000	55074000	49034000	28432000	52863000	64040000	35790000			+	15	15	15	25.6	25.6	25.6	85.696	0	232.97	560530000	45	7943700	14274000	18071000	72302000	81005000	34387000	46792000	29146000	26266000	95593000	89783000	44965000	2	2	1	5	12	3	3	2	3	4	5	3
134950000	65076000	80115000	65282000	44784000	57601000	20603000	17190000	13185000	11397000	12561000	4739500				10	10	9	24.5	24.5	21.5	45.371	0	114.63	570460000	19	91540000	128890000	149420000	39339000	45794000	36233000	12936000	19704000	18444000	14714000	8202800	5243400	3	3	1	3	4	0	0	0	1	0	2	2
0	0	0	0	0	0	9784700	7218500	8510500	0	0	0	+			1	1	1	3.2	3.2	3.2	28.777	1	-2	30498000	1	0	0	0	0	0	0	10423000	7800000	12276000	0	0	0	0	0	0	0	0	0	1	0	0	0	0	0
1983900	2314500	1901700	5630900	3723300	0	17697000	4948400	6926600	29365000	8545200	13992000				7	7	7	16.3	16.3	16.3	65.163	0	189.67	118920000	16	1141300	1769000	1105500	2029900	4855900	0	17561000	6022800	3167900	45318000	18714000	17234000	1	2	1	1	0	0	1	1	1	3	2	3
0	0	0	0	0	0	0	0	0	2479100	0	2529500				2	2	2	17.8	17.8	17.8	22.277	0	21.765	6558100	4	0	0	0	0	0	0	0	0	0	3974600	0	2583600	0	0	0	0	0	0	0	0	1	2	0	1
802850	3622000	1353700	0	0	0	0	0	0	0	0	0				4	4	4	15.3	15.3	15.3	45.14	0	71.552	7632300	5	750360	5631500	1250400	0	0	0	0	0	0	0	0	0	1	2	2	0	0	0	0	0	0	0	0	0
2084300	0	1883200	14531000	4908300	1717000	45601000	22150000	17889000	7566200	30640000	11511000				8	8	8	17	17	17	501.31	0	91.086	189340000	28	494160	0	574550	6347500	3172300	167750	35304000	41377000	29641000	23484000	30072000	18702000	0	0	0	2	1	0	6	4	5	1	6	3
0	3204200	0	0	0	0	0	0	0	0	0	0				2	2	2	1.8	1.8	1.8	139.09	0	11.671	4347700	2	0	4347700	0	0	0	0	0	0	0	0	0	0	0	1	1	0	0	0	0	0	0	0	0	0
11311000	21500000	15549000	0	0	0	2096300	381740	259490	481730	0	977600				6	6	6	20.4	20.4	20.4	54.565	0	67.067	67584000	10	10337000	26474000	23408000	0	0	0	4228200	246690	166930	1805100	0	918360	2	4	4	0	0	0	0	0	0	0	0	0
581619968	261830000	258630000	52994000	70325000	50894000	119210000	148700000	60205000	143720000	90395000	72348000				6	6	2	82.1	82.1	27.4	11.265	0	280.57	2308100000	47	42330000	251190000	278760000	34334000	102280000	35875000	323240000	246720000	194420000	354620000	344580000	99726000	6	6	6	1	3	3	5	2	3	5	2	5
13283000	13654000	8019500	3095400	9737700	6906700	3111300	6306700	4749000	5560800	5230300	4418000				7	7	7	23.3	23.3	23.3	48.803	0	145.62	105260000	14	13037000	27967000	25619000	2288400	854190	342810	218650	4623200	10922000	8524400	3711200	7148800	4	2	1	2	0	0	0	2	1	1	1	0
0	0	0	0	0	0	0	0	0	0	0	0				1	1	1	1.9	1.9	1.9	104.79	0	28.125	0	1	0	0	0	0	0	0	0	0	0	0	0	0	0	1	0	0	0	0	0	0	0	0	0	0
0	87324	0	0	0	0	618960	0	0	0	0	0				1	1	1	7	7	7	22.963	0	7.5957	795150	1	0	118490	0	0	0	0	676660	0	0	0	0	0	0	0	0	0	0	0	1	0	0	0	0	0
16919000	15389000	72303000	0	3868400	0	0	0	0	2676600	0	3747400				7	7	5	39.8	39.8	31.3	23.602	0	179.76	148360000	14	27173000	53252000	63196000	0	1610100	0	0	0	0	1123100	0	2007700	1	5	8	0	0	0	0	0	0	0	0	0
2357100	0	702510	0	1685700	0	5625600	2843800	4017600	2187100	869300	2024700				3	3	3	4	4	4	105.21	0	25.288	26631000	6	2930400	0	189910	0	916170	0	4992300	3622500	5532500	5459800	674860	2312200	1	0	0	0	1	0	2	0	2	0	0	0
982040	955570	0	0	0	0	0	0	0	0	0	0			+	2	2	2	2.4	2.4	2.4	101.39	0	11.711	7967400	2	982040	1296600	0	0	0	0	0	0	3607600	2081200	0	0	1	0	0	0	0	0	0	0	1	0	0	0
4476900	2877100	520500	1299200	0	0	0	0	219800	0	0	0				3	3	3	9.5	9.5	9.5	60.556	0	35.172	10589000	5	5069000	2584000	2364700	404220	0	0	0	0	167430	0	0	0	2	1	1	1	0	0	0	0	0	0	0	0
7012000	11715000	6543900	0	0	0	0	0	0	0	0	0				5	5	5	23.8	23.8	23.8	34.258	0	140.43	32325000	10	6883700	15047000	10394000	0	0	0	0	0	0	0	0	0	2	5	3	0	0	0	0	0	0	0	0	0
0	0	0	10253000	10142000	8569200	3556300	5434000	4379300	2285400	1939300	2298600				6	6	6	21.1	21.1	21.1	39.731	0	167.08	45009000	20	0	0	0	7018600	13675000	3980900	2453400	6090300	4601600	3033800	1939500	2215900	0	1	0	2	4	3	0	3	2	2	1	2
1330300	3236200	1349900	3315600	4553000	8405000	4276800	5700200	4246000	7430600	18242000	12240000				5	5	5	11.4	11.4	11.4	66.034	0	91.331	85060000	15	598620	1118500	877880	2373500	4424600	3443900	6763600	14319000	6588200	10846000	21110000	12597000	0	0	0	1	1	2	2	1	1	3	3	1
0	1149900	575670	0	0	0	0	0	0	0	0	0				2	2	2	7.2	7.2	7.2	46.312	0	37.889	2386900	2	0	1425200	961750	0	0	0	0	0	0	0	0	0	0	0	2	0	0	0	0	0	0	0	0	0
6247000	5140400	5952700	0	0	0	0	0	0	0	0	0				7	7	7	14.7	14.7	14.7	69.068	0	101.97	21831000	9	5852600	7720300	8258000	0	0	0	0	0	0	0	0	0	3	4	2	0	0	0	0	0	0	0	0	0
0	1421800	0	0	0	0	0	0	0	0	0	0			+	2	2	2	7.7	7.7	7.7	38.429	0	48.849	1929300	3	0	1929300	0	0	0	0	0	0	0	0	0	0	1	1	1	0	0	0	0	0	0	0	0	0
0	0	0	9483200	3315800	11067000	7089900	8437500	15766000	13944000	4965200	17242000				3	3	3	18.1	18.1	18.1	14.553	0	23.665	105250000	3	0	0	0	4177400	3385700	4883900	4625100	6407500	19335000	22423000	8785100	31230000	0	0	0	0	1	0	0	0	0	0	2	0
13466000	17489000	11342000	0	0	0	0	0	0	0	0	0				6	6	4	53.1	53.1	40.1	15.998	0	141.84	52876000	10	15288000	17731000	19858000	0	0	0	0	0	0	0	0	0	3	4	3	0	0	0	0	0	0	0	0	0
0	0	0	0	0	0	0	0	0	0	0	0	+			1	1	1	6.2	6.2	6.2	24.337	1	-2	0	1	0	0	0	0	0	0	0	0	0	0	0	0	0	0	0	0	0	0	0	0	0	0	0	1
0	0	0	0	0	2964600	0	0	0	0	0	0	+			1	1	1	3.2	3.2	3.2	58.042	1	-2	1754800	1	0	0	0	0	0	1754800	0	0	0	0	0	0	0	0	0	0	0	1	0	0	0	0	0	0
0	0	0	0	0	0	19004000	21122000	23527000	1715400	0	0				7	7	7	14.4	14.4	14.4	59.864	0	88.505	80133000	12	0	0	0	0	0	0	15427000	23036000	39875000	1794200	0	0	0	0	0	0	0	0	2	5	5	0	0	0
10208000	16374000	5847700	14150000	9927400	9647300	6507400	7687900	3875000	1478600	4577500	2794900				7	7	7	9.2	9.2	9.2	103.36	0	48.339	101800000	20	20783000	6962600	29488000	7312900	4364000	5273800	400050	4818300	6081100	11784000	331030	4197700	2	4	1	3	2	1	1	3	1	0	1	1
0	0	0	0	0	0	0	0	0	0	0	493660				1	1	1	22.5	22.5	22.5	13.988	0	29.361	611930	1	0	0	0	0	0	0	0	0	0	0	0	611930	0	0	0	0	0	0	0	0	0	0	0	1
0	0	0	0	0	0	0	0	0	0	0	1364400	+			1	1	1	8.6	8.6	8.6	25.488	1	-2	76093000	0	0	0	0	8499100	7448100	0	0	0	35395000	21931000	1128300	1691300	0	0	0	0	0	0	0	0	0	0	0	0
718840	463440	862860	0	0	0	0	0	0	0	0	0	+			1	1	1	9.6	9.6	9.6	13.637	1	-2	2609200	1	638550	660160	1310500	0	0	0	0	0	0	0	0	0	0	1	0	0	0	0	0	0	0	0	0	0
1049400	0	0	0	0	0	0	0	0	0	0	0	+			1	1	1	3.9	3.9	3.9	38.553	1	-2	6897600	0	1049400	0	0	0	5848300	0	0	0	0	0	0	0	0	0	0	0	0	0	0	0	0	0	0	0
0	0	0	0	0	82954	0	0	71351	0	77969	62021	+			1	1	1	1.6	1.6	1.6	81.171	1	-2	314950	1	0	0	0	0	0	54229	0	0	93152	0	104090	63482	0	0	0	0	0	0	0	0	1	0	0	0
0	0	0	0	0	0	0	1823900	3224400	0	0	0	+			1	1	1	1	1	1	86.606	1	-2	6386600	1	0	0	0	0	0	0	0	2127800	4258800	0	0	0	0	0	0	0	0	0	0	1	0	0	0	0
0	0	0	9201800	6625300	6252200	14789000	4233000	1705300	2962100	0	0	+			1	1	1	1.7	1.7	1.7	112.09	1	-2	38703000	1	0	0	0	10067000	7627100	4309500	9869600	3893500	715440	2221100	0	0	0	0	0	0	0	0	1	0	0	0	0	0
4934000	4975500	2642300	0	2952500	0	5479500	1348200	787400	5069800	5693000	1499400				1	1	1	0.2	0.2	0.2	771.15	0	9.2995	53104000	3	4997900	6857600	3095800	0	2351100	0	6283700	1033800	1149500	7043100	16184000	4108400	0	0	0	0	0	0	0	0	1	0	1	1
0	0	0	0	0	0	0	0	1173600	0	0	0	+			1	1	1	3.4	3.4	3.4	54.035	1	-2	1550200	1	0	0	0	0	0	0	0	0	1550200	0	0	0	0	0	0	0	0	0	0	0	1	0	0	0
0	0	0	0	0	0	0	0	220020	0	0	0				1	1	1	2.9	2.9	2.9	35.026	0	7.0805	290600	1	0	0	0	0	0	0	0	0	290600	0	0	0	0	0	0	0	0	0	0	0	1	0	0	0
0	654790	0	0	0	0	0	0	0	0	0	0	+			1	1	1	10	10	10	13.535	1	-2	1604800	0	716380	888470	0	0	0	0	0	0	0	0	0	0	0	0	0	0	0	0	0	0	0	0	0	0
0	0	0	0	0	0	0	0	0	996720	0	986270				1	1	1	1.1	1.1	1.1	102.51	0	7.5215	2577200	1	0	0	0	0	0	0	0	0	0	1354700	0	1222500	0	0	0	0	0	0	0	0	0	0	0	1
743410	512190	833090	0	0	0	0	0	0	0	0	0				2	2	2	5.2	5.2	5.2	62.216	0	11.244	2646600	2	689040	725040	1232500	0	0	0	0	0	0	0	0	0	0	1	1	0	0	0	0	0	0	0	0	0
0	0	0	0	0	0	0	0	0	191030	0	0	+			1	1	1	5.6	5.6	5.6	40.939	1	-2	861450	0	0	0	0	0	0	76446	0	0	525360	259640	0	0	0	0	0	0	0	0	0	0	0	0	0	0
0	0	0	0	0	0	0	0	0	0	0	0	+			1	1	1	5.3	5.3	5.3	27.013	1	-2	0	1	0	0	0	0	0	0	0	0	0	0	0	0	0	0	0	0	0	0	0	0	0	0	0	1
0	0	0	0	0	0	3528400	4550400	9261100	8857100	6984200	13523000				1	1	1	3.3	3.3	3.3	52.263	0	13.352	86196000	9	0	0	0	0	0	0	3857300	5308500	22648000	12038000	17629000	24716000	0	0	0	0	0	1	1	1	2	1	1	2
0	0	0	0	0	0	0	0	0	0	0	40009000				1	1	1	1.4	1.4	1.4	99.914	0	6.1954	246150000	0	0	0	0	3883100	3236100	2931100	38629000	48980000	50808000	3273300	44820000	49594000	0	0	0	0	0	0	0	0	0	0	0	0
0	0	0	0	0	0	1096400	2554300	3628600	3119600	1438300	3320900				2	2	2	5.1	5.1	5.1	48.506	0	12.541	19221000	3	0	0	0	0	0	0	1317700	2497700	5706700	4340400	873000	4486000	0	0	0	0	0	0	1	0	0	1	0	1
198470	168800	134640	0	0	0	0	0	0	0	0	0	+	+		1	1	1	0	0	0	206.89	1	-2	811060	3	198470	229040	383550	0	0	0	0	0	0	0	0	0	1	0	2	0	0	0	0	0	0	0	0	0
0	0	0	0	0	0	9382600	7422100	7191500	0	1646500	3772700		+		1	1	1	0	0	0	12.854	0.0068966	6.1909	37411000	1	0	0	0	0	0	0	12637000	8438400	8969400	0	5049400	2316600	0	0	0	0	0	0	0	0	0	0	1	0
[truncated: 6 more columns]

## Sheet: table2
Table 2. Proteins identified after excluding reverse sequencies and "only identified by site" entries
LFQ intensity Plasma1	LFQ intensity Plasma2	LFQ intensity Plasma3	LFQ intensity NUAP1	LFQ intensity NUAP2	LFQ intensity NUAP3	LFQ intensity ZFP1	LFQ intensity ZFP2	LFQ intensity ZFP3	LFQ intensity ZWP1	LFQ intensity ZWP2	LFQ intensity ZWP3	Only identified by site	Reverse	Potential contaminant	Peptides	Razor + unique peptides	Unique peptides	Sequence coverage [%]	Unique + razor sequence coverage [%]	Unique sequence coverage [%]	Mol. weight [kDa]	Q-value	Score	Intensity	MS/MS count	Intensity Plasma1	Intensity Plasma2	Intensity Plasma3	Intensity NUAP1	Intensity NUAP2	Intensity NUAP3	Intensity ZFP1	Intensity ZFP2	Intensity ZFP3	Intensity ZWP1	Intensity ZWP2	Intensity ZWP3	MS/MS count Plasma1	MS/MS count Plasma2	MS/MS count Plasma3	MS/MS count NUAP1	MS/MS count NUAP2	MS/MS count NUAP3	MS/MS count ZFP1	MS/MS count ZFP2	MS/MS count ZFP3	MS/MS count ZWP1	MS/MS count ZWP2	MS/MS count ZWP3
#!{Type}E	E	E	E	E	E	E	E	E	E	E	E	C	C	C	N	N	N	N	N	N	N	N	N	N	N	N	N	N	N	N	N	N	N	N	N	N	N	N	N	N	N	N	N	N	N	N	N	N	N
454340000	907369984	286940000	5052200	6082100	936160	2341600	761030	483770	714050	1497000	505630				25	25	25	61.7	61.7	61.7	46.708	0	323.31	2121200000	84	473680000	863930000	717700000	8373300	10076000	3632900	4405300	13647000	5756900	4313800	10399000	5290000	22	26	30	2	2	0	0	1	0	1	0	0
34951000	6915000	27678000	3807100	2377100	1657100	5669600	3755800	6838000	7529700	5782200	8739100				1	1	1	7.8	7.8	7.8	12.586	0	6.2754	139680000	2	23136000	14040000	26096000	2698200	1945500	718470	8398200	4831900	13440000	15980000	10175000	18223000	1	0	1	0	0	0	0	0	0	0	0	0
0	0	0	675430	0	873490	3302700	0	0	0	0	0				1	1	1	8.7	8.7	8.7	12.441	0	6.2085	4558800	2	0	0	0	431140	0	517020	3610600	0	0	0	0	0	0	0	0	0	0	1	1	0	0	0	0	0
14120000	7109000	15728000	3759200	0	3106900	1560000	1956000	2976100	2688700	1153100	3712900				1	1	1	13.9	13.9	13.9	12.332	0	90.908	68824000	3	10964000	15743000	17395000	1863200	0	2277600	1678800	2422200	4799200	4313100	1319800	6048900	1	0	1	1	0	0	0	0	0	0	0	0
0	0	0	0	0	0	0	0	516760	643790	1056700	0				1	1	1	9.3	9.3	9.3	12.891	0	6.3172	2922200	1	0	0	0	0	0	0	0	0	630440	1006900	1284900	0	0	0	0	0	0	0	0	0	0	0	1	0
0	0	0	0	29540	0	33850	39079	32466	33017	241190	31979				1	1	1	11.1	11.1	11.1	13.012	0	6.5797	542560	1	0	0	0	0	31323	0	48196	68552	53569	57009	235140	48775	0	0	0	0	0	0	0	0	0	0	1	0
0	0	0	0	0	0	0	0	0	601040	0	0				1	1	1	7.8	7.8	7.8	12.534	0	7.0244	816890	1	0	0	0	0	0	0	0	0	0	816890	0	0	0	0	0	0	0	0	0	0	0	1	0	0
107380000	45702000	89125000	159590	0	159330	0	0	0	0	0	0				9	9	9	88.7	88.7	88.7	12.633	0	199.9	311470000	52	78972000	133640000	98629000	123930	0	99485	0	0	0	0	0	0	14	17	20	1	0	0	0	0	0	0	0	0
698920	0	0	0	0	0	0	0	979720	922800	706920	0				1	1	1	5.1	5.1	5.1	18.118	0	6.8748	4204800	1	551470	0	0	0	0	0	0	0	1431300	1306600	915500	0	0	0	0	0	0	0	0	0	0	0	1	0
3165600	0	0	0	0	0	5818400	6237800	8817200	21866000	7897900	8721600				7	7	7	12.8	12.8	12.8	75.905	0	119.34	79427000	19	975830	0	0	0	0	0	6791700	8084100	14644000	26940000	8349600	13642000	0	0	0	0	0	0	3	3	2	5	3	3
3838700	7293600	9531900	83035000	168910000	242710000	52386000	208080000	90119000	26841000	79714000	32842000				3	3	3	20.2	20.2	20.2	23.353	0	22.462	970690000	17	2050300	5285800	7251400	52548000	164790000	150820000	58315000	227180000	123280000	35936000	100150000	43084000	1	1	1	3	3	2	0	0	2	1	1	2
0	0	0	3464900	1579800	0	0	1610500	2197000	8828100	6864600	6009500				4	4	4	1.9	1.9	1.9	252.23	0	45.333	37830000	8	0	0	0	1308800	631840	0	0	2723400	576510	13497000	9513100	9578400	0	0	0	0	1	1	0	1	0	1	3	1
424969984	161640000	143650000	286740000	382409984	146150000	347400000	326950016	454040000	814830016	466329984	476209984				13	13	6	45.6	45.6	26.1	43.911	0	323.31	5029200000	207	199340000	103100000	99828000	136850000	424240000	210220000	511780000	581980000	767060000	531960000	720050000	742780000	9	5	4	14	17	9	25	21	19	32	24	28
0	0	0	0	0	0	0	0	0	0	0	0				1	1	1	3	3	3	47.428	0	6.4303	0	1	0	0	0	0	0	0	0	0	0	0	0	0	0	0	0	0	0	0	0	0	0	1	0	0
0	0	0	0	0	0	0	0	114910	210080	0	0				1	1	1	9.4	9.4	9.4	13.508	0	7.5957	437300	1	0	0	0	0	0	0	0	0	151770	285520	0	0	0	0	0	0	0	0	0	0	0	1	0	0
0	0	227580	0	0	0	1697300	0	393310	0	750700	368270				2	1	1	16.8	10.9	10.9	12.926	0	7.7281	4205800	1	0	0	182820	0	0	0	1304000	0	506360	0	1796000	416610	0	0	0	0	0	0	1	0	0	0	0	0
2377300	0	0	0	0	0	0	0	0	633850	1103500	0				3	2	2	28.2	18.8	18.8	12.839	0	11.025	4593500	2	2691600	0	0	0	0	0	0	0	0	1336200	565680	0	1	0	0	0	0	0	0	0	0	1	0	0
18255000	17977000	19846000	5426800	8711200	8436900	11098000	24041000	10066000	9783700	7946100	12898000				6	2	2	39.5	12.6	12.6	23.15	0	37.884	185370000	21	17175000	24947000	34820000	3331100	7814800	5040000	18131000	28481000	12824000	15769000	1626200	15408000	3	5	4	1	1	2	1	1	1	1	1	0
1756100	0	1257800	0	0	0	2819600	5626000	0	0	0	3768600				2	1	1	30.6	11.2	11.2	10.657	0	14.107	17849000	4	1655800	0	1759000	0	0	0	3403400	6444200	0	0	0	4586600	0	1	1	0	0	0	0	1	0	0	0	1
0	0	0	0	0	0	0	981270	1571400	1392900	1393700	1490400				2	2	2	21.6	21.6	21.6	12.515	0	11.958	12649000	2	1083000	1561000	1264200	0	0	0	0	1233600	2195900	1775400	1681900	1853900	0	1	0	0	0	0	0	1	0	0	0	0
0	0	0	0	0	0	12474000	2746000	0	7699400	3931300	3009900				2	2	2	23.9	23.9	23.9	12.82	0	70.159	36787000	4	0	0	0	0	0	0	11636000	2551700	0	15175000	4313800	3111300	0	0	0	0	0	0	1	0	1	1	1	0
0	0	0	0	189860	0	738690	702310	251340	708120	920070	0				1	1	1	9.4	9.4	9.4	12.772	0	11.001	4281600	6	0	0	0	0	177120	0	807550	819310	331980	962430	1183200	0	0	0	0	0	0	0	1	1	1	1	1	1
0	0	0	34872000	30679000	43510000	30655000	20601000	29321000	28799000	19940000	22022000				1	1	1	7.8	7.8	7.8	12.943	0	7.0232	260920000	2	0	0	0	22821000	27523000	29493000	32214000	18939000	36409000	36469000	27632000	29416000	0	0	0	0	0	0	0	0	0	0	1	1
0	0	0	0	0	0	2872400	2426700	1450300	4889400	3900100	1832400				1	1	1	13	13	13	12.537	0	12.989	21802000	4	0	0	0	0	0	0	3104100	3019400	1893500	6568800	4957800	2258300	0	0	0	0	0	0	1	0	1	1	1	0
39463000	23312000	30003000	18320000	8647900	14244000	27774000	21644000	22694000	92263000	9192500	57201000				21	21	21	18.5	18.5	18.5	187.67	0	259.7	446180000	47	43597000	32356000	36365000	6496600	7179600	4893000	21363000	19014000	28545000	139200000	12906000	94263000	2	1	5	3	4	2	5	3	2	8	3	9
2560900	2404900	2287400	5615800	9381700	3872700	5509000	8041600	22200000	20966000	14279000	11857000				4	4	3	32.5	32.5	23.1	12.965	0	82.169	127440000	16	3065600	3181900	4075700	4258800	8136200	4076100	16255000	10427000	15745000	30631000	14916000	12667000	0	1	0	1	1	0	1	1	2	4	2	3
0	0	0	0	0	0	3958000	3654900	4548700	4758000	2123800	4840200				1	1	1	12.6	12.6	12.6	11.603	0	6.8344	29945000	1	0	0	0	0	0	0	4377700	3983600	6985600	7865200	1482600	5250500	0	0	0	0	0	0	0	0	0	0	0	1
4631000	2110400	3888600	19658000	13122000	18337000	12434000	6117300	14150000	18519000	8916500	33378000				3	3	3	14.5	14.5	14.5	35.116	0	56.634	168600000	7	2869100	2630600	3284700	11162000	9839300	10948000	12346000	7347900	20154000	27744000	9227700	51045000	0	1	0	3	1	0	0	1	1	0	0	0
37496000	3266200	5349200	5485600	22778000	7872600	10895000	29572000	13708000	3863500	17375000	13274000			+	11	11	9	16.7	16.7	14	59.51	0	278.33	191930000	29	31094000	2497500	2911700	1808700	17623000	3233500	16817000	41076000	21588000	5612900	25934000	21736000	5	1	1	1	4	1	0	6	2	2	3	3
5954300	4773900	12573000	38491000	77849000	57855000	47803000	46268000	36882000	68912000	67804000	40826000				13	7	5	47.2	32.6	25.2	41.215	0	213.56	560210000	51	29196000	18547000	15631000	37038000	61207000	19262000	44869000	48855000	35197000	92464000	106030000	51906000	1	1	2	3	5	5	6	7	3	6	7	5
144540000	188940000	139680000	17363000	9363700	21733000	15160000	18838000	12258000	61508000	15528000	32194000				10	10	10	31.4	31.4	31.4	42.848	0	156.9	843970000	24	123370000	243550000	172120000	6619300	4716800	4509000	43473000	22616000	26614000	93607000	25255000	77526000	2	7	7	0	0	0	1	2	1	2	1	1
16077000	9916000	8489800	1033900	1440600	871020	1235400	1713500	3019200	8695600	4550100	6105700				10	4	3	35.4	18.2	14.7	43.805	0	50.347	75077000	25	20889000	10583000	9545200	237680	4031100	212550	5300100	1679200	1647200	5406300	7360500	8184400	7	1	1	1	0	1	2	2	1	4	3	2
818700	262660	0	1056200	1883000	171120	0	0	0	597630	0	682780				2	2	2	9.8	9.8	9.8	23.845	0	13.351	6047900	2	1827900	255280	0	87306	1056600	5536.4	0	0	0	1323800	0	1491600	0	0	0	1	0	0	0	0	0	0	0	1
0	0	0	106210	0	0	0	0	0	20000	0	0				3	1	1	29.9	11.2	11.2	13.842	0	6.4495	94979	1	0	0	0	67796	0	0	0	0	0	27183	0	0	0	0	0	1	0	0	0	0	0	0	0	0
347040	330370	642780	670190	2293000	0	17757000	18688000	13024000	94619000	30031000	20930000				6	6	6	11.3	11.3	11.3	80.173	0	97.299	251690000	16	270240	349070	417460	568480	2021300	0	23211000	23212000	20145000	89500000	33998000	57992000	1	1	0	0	0	0	2	0	2	5	1	4
0	1385400	1645600	601040	1299100	0	975300	0	997170	2034200	475610	712540				3	3	1	36.6	36.6	10.9	11.167	0	19.037	12770000	3	0	1595100	2362600	428570	51682	0	1868900	0	804440	4271800	540660	846540	0	0	0	0	0	0	0	0	0	1	0	2
64150000	67371000	50028000	14831000	10950000	11073000	4919600	2586500	3705400	32210000	6129900	29411000				14	14	14	31.3	31.3	31.3	53.213	0	323.31	366650000	51	61852000	99528000	92076000	5589900	5567800	3696400	4630800	1744500	3591300	41728000	7883300	38758000	8	8	8	2	2	2	4	1	1	8	2	5
957390	1157300	0	0	881720	0	2416700	2639900	2927200	0	2845200	13341000				1	1	1	0.9	0.9	0.9	145.62	0	7.9581	33301000	2	831290	1499000	0	0	685400	0	3644700	2400900	5870100	0	5476800	12893000	0	0	0	0	0	0	0	1	0	0	0	1
10199000	13917000	12112000	6940200	2970300	3726400	1902200	0	2447500	1445800	0	1908000				6	6	6	30.2	30.2	30.2	30.67	0	59.978	71612000	15	14242000	24965000	25949000	697300	1407500	764600	397580	0	1085700	932250	0	1171400	2	1	2	0	1	2	0	1	3	2	0	1
0	0	0	363870016	94397000	249490000	41989000	54606000	46976000	22962000	15614000	15390000				1	1	1	1.5	1.5	1.5	52.991	0	8.6	691200000	8	0	0	0	274370000	26777000	152530000	46108000	80837000	77055000	5923900	3351500	24251000	0	0	0	2	0	2	2	1	0	0	0	1
11915000	14763000	19512000	13312000	7562200	6464000	10370000	6902700	13777000	9152200	7525600	12235000				1	1	1	13.7	13.7	13.7	12.815	0	127.93	152890000	11	11684000	18278000	26172000	8623300	7076800	4660300	11310000	6050400	20341000	12132000	10145000	16420000	0	0	0	2	0	1	2	1	1	1	1	2
5484000	3481300	5997100	0	0	1584000	2378000	1734600	2203800	4388300	2576000	1865300				1	1	1	17.1	17.1	17.1	8.1675	0	10.268	38749000	10	5680900	4717700	8531300	0	0	936380	2596400	2021000	2690600	5956800	3308600	2309200	0	1	1	1	1	1	1	1	0	1	1	1
2609300	1282000	1691100	9490100	5335000	27137000	12919000	8726600	5888900	3340300	4538600	5345200				6	6	6	26.5	26.5	26.5	24.158	0	106.34	96244000	16	2600200	1578500	2418900	7287100	8898300	5025500	8775900	12127000	12264000	8672000	14978000	11618000	0	0	1	2	1	1	1	3	2	1	1	3
0	0	0	5890600	4322600	4721500	17053000	41094000	0	13818000	16484000	20179000				1	1	1	2	2	2	76.736	0	7.139	147580000	1	0	0	0	1809100	1423700	1077700	25967000	26346000	0	21195000	28540000	41226000	0	0	0	0	0	0	0	1	0	0	0	0
77077	0	0	0	32202000	152730	118080	3532400	185770	358950	920920	157430			+	6	2	0	9.9	3	0	63.165	0	12.252	40397000	3	42670	0	0	0	14456000	780790	3893800	9569900	716400	1122300	6989500	2825500	0	0	0	0	1	0	0	2	0	0	0	0
285760000	180540000	271380000	212060000	250660000	144730000	361960000	215750000	308449984	315460000	514400000	251150000			+	4	4	4	25.1	25.1	25.1	24.409	0	102.7	4012700000	32	34005000	176350000	54274000	54653000	164500000	41248000	411050000	560130000	480590000	751490000	803710000	480700000	2	2	2	1	4	2	3	4	3	2	4	3
2187800	840520	0	746530	0	0	0	0	0	0	0	0			+	4	4	2	36.6	36.6	19	15.184	0	26.552	4230900	8	2644900	1556800	0	29247	0	0	0	0	0	0	0	0	6	1	1	0	0	0	0	0	0	0	0	0
298810	0	0	314520	491140	0	397510	0	0	0	373730	251140			+	3	1	1	6.1	2.8	2.8	51.621	0	6.5521	2159300	1	235750	0	0	192550	594170	0	456120	0	0	0	474260	206430	0	0	0	1	0	0	0	0	0	0	0	0
0	0	0	12729000	2124900	2525300	1682400	1168400	970130	0	0	0			+	5	1	1	9.3	2.6	2.6	56.44	0	8.9873	18034000	3	0	0	0	7083800	1728200	4200900	2339200	1444600	1237500	0	0	0	0	0	0	1	1	1	0	0	0	0	0	0
13893000192	21316999168	16184999936	858750016	675020032	311249984	423280000	333430016	183460000	426489984	360900000	235490000			+	57	57	52	79	79	73.9	69.366	0	323.31	68138000000	867	20293000000	23169000000	21484000000	506650000	355030000	94046000	472540000	343740000	251710000	455790000	383540000	329620000	198	197	208	61	45	28	30	25	8	26	22	19
8028400	5244700	3170000	0	0	5250900	3656100	0	8609000	1532300	1872300	5973000			+	12	7	7	20.4	14.2	14.2	69.293	0	45.632	51797000	15	11232000	8348600	7741800	0	0	1715800	890690	393990	8527100	730040	1553900	10663000	5	1	1	1	0	0	0	0	3	1	1	2
1781700	901770	921380	1370700	627630	954560	776200	542610	396700	1022800	590360	1011400			+	4	3	3	18.7	15.3	15.3	38.418	0	38.565	13573000	49	520820	363910	395610	663580	1014800	1433600	1223200	1109400	2756400	398590	365170	3327700	3	6	5	7	4	4	2	0	2	7	4	5
244660	0	0	92075	0	0	49118	0	0	53582	0	0			+	2	1	1	10.9	4.9	4.9	30.276	0	12.334	493780	5	201030	0	0	93750	0	0	79247	0	0	119750	0	0	4	0	0	0	0	0	0	0	0	1	0	0
775360	97720	114090	942970	0	90109	46167	0	0	91472	60667	0			+	2	2	2	7.7	7.7	7.7	46.103	0	18.003	2432000	14	963810	106270	129060	741840	0	155220	27803	0	0	258760	49265	0	7	1	0	4	0	0	0	0	0	2	0	0
0	0	1547000	340030	1325900	1101700	558210	2853000	704500	0	1574600	588750			+	5	5	5	11.9	11.9	11.9	62.129	0	93.126	12007000	15	0	0	1888100	187590	1833400	493800	258490	3306800	2336100	0	1337600	365420	0	0	2	1	1	2	1	2	2	0	2	2
165650	0	0	0	968600	196290	292580	511280	315380	0	778640	185450			+	6	2	2	10.9	5	5	65.865	0	11.095	3514900	2	62719	0	0	0	2000500	52126	28528	374690	300280	0	598640	97441	0	0	0	0	0	0	0	1	0	0	1	0
0	0	0	0	0	0	0	0	0	0	0	0			+	1	1	1	6.2	6.2	6.2	21.653	0	13.799	0	1	0	0	0	0	0	0	0	0	0	0	0	0	0	0	0	0	0	0	0	0	0	1	0	0
2375300	4371500	3493400	2998600	4531900	3807600	2109600	3244400	1243700	1503900	2677800	660350			+	2	1	1	6.1	2.9	2.9	43.017	0	29.25	34643000	2	2271600	4609500	5770700	2056600	5584600	2728800	2078500	2941300	1136700	1555300	3496500	412730	0	1	0	0	0	0	0	1	0	0	0	0
168140	0	0	99511	0	0	26563	0	0	52161	0	0			+	4	2	2	24.9	15.4	15.4	22.06	0	47.333	470810	9	332040	0	0	53928	0	0	24654	0	0	60188	0	0	6	0	0	2	0	0	0	0	0	1	0	0
6479400	668260	2682000	100540000	93629000	109930000	86686000	153700000	268600000	916129984	124160000	742179968				8	8	8	45	45	45	26.459	0	190.9	3218600000	94	2343700	122350	1029800	70167000	57321000	24745000	154320000	117010000	419470000	1022300000	221500000	1128300000	0	0	0	5	4	1	7	10	10	23	12	22
45054000	104310000	104670000	191400	129750	1034300	441750	1185400	0	380770	249060	170730				12	12	12	30.9	30.9	30.9	53.02	0	174.79	326500000	32	79780000	101550000	136880000	108030	107030	326750	1425000	1321400	0	2606200	818930	1577000	4	11	10	1	1	2	0	2	0	1	0	0
0	0	19129	36083	0	49966	0	293390	140880	0	164300	96103				1	1	1	2.4	2.4	2.4	55.389	0	7.0855	918750	4	0	0	30479	30195	0	42059	0	325230	176820	0	200770	113200	0	0	0	0	0	0	0	1	1	0	1	1
0	0	0	0	0	0	0	0	0	15983000	3869500	2783600				2	2	2	8	8	8	45.147	0	18.295	39082000	3	261420	0	425050	1261200	0	0	4447700	1026100	1567200	21551000	3847700	4694400	0	0	0	0	0	0	0	0	0	2	1	0
0	0	0	0	0	0	0	0	0	0	0	0				1	1	1	2.9	2.9	2.9	50.753	0.0068493	6.159	0	1	0	0	0	0	0	0	0	0	0	0	0	0	0	0	0	0	0	1	0	0	0	0	0	0
20431000	5010700	8089500	1683800	819790	0	2991000	2660800	2593800	0	1999600	1727100				7	7	7	11.5	11.5	11.5	97.712	0	96.809	56470000	11	18588000	9818600	13168000	943980	327010	0	1837200	4307800	4445700	0	2682100	351740	4	3	3	0	0	0	0	0	1	0	0	0
1867100	2856400	3419200	869110	787210	0	9350900	5876700	2505300	4279700	2455200	1509000			+	7	7	7	14.4	14.4	14.4	65.408	0	102.42	42891000	17	3834600	4990900	5716100	396020	651860	0	10023000	6187900	3578900	3346600	2537900	1627700	0	2	4	0	0	0	3	2	2	2	1	1
0	0	0	3812900	13728000	4587800	11998000	23232000	22844000	5480500	14083000	19731000				1	1	1	5.7	5.7	5.7	14.139	0	6.6598	139910000	5	0	0	0	2337000	11485000	2705900	11762000	24304000	41448000	7690900	16241000	21933000	0	0	0	0	1	0	1	1	0	0	1	1
0	0	123780	598890	774770	0	1547600	0	1080300	1148000	0	0				1	1	1	12.7	12.7	12.7	11.674	0	8.9757	6134900	1	0	0	252030	199830	488770	0	2285400	0	1345500	1563300	0	0	0	0	1	0	0	0	0	0	0	0	0	0
0	0	0	4444700	2224300	4699700	7191800	4828400	5413100	40709000	9910000	9095400				6	6	6	12.1	12.1	12.1	60.04	0	102.26	106330000	8	0	0	0	2770600	1366900	2663600	11756000	7273600	7354100	42768000	11003000	19376000	0	0	0	0	0	0	0	0	1	4	2	1
0	0	0	0	0	0	42959	45816	0	0	0	0				1	1	1	2.2	2.2	2.2	79.696	0	6.3804	100410	1	0	0	0	0	0	0	46964	53449	0	0	0	0	0	0	0	0	0	0	1	0	0	0	0	0
1779800	0	0	13783000	12131000	17851000	38937000	27839000	40626000	124100000	89855000	64672000				14	14	14	23.8	23.8	23.8	76.773	0	281.89	519140000	40	749230	0	0	9043800	12066000	12299000	34998000	46317000	39262000	98661000	188030000	77715000	0	0	0	1	1	2	4	4	5	9	9	5
0	4954300	0	19704000	7080400	39593000	22538000	23117000	22696000	16912000	7348500	18059000				2	2	2	28.6	28.6	28.6	8.647	0	12.25	172490000	3	0	1474300	0	13280000	11275000	32213000	22625000	23655000	32630000	3721600	11041000	20577000	0	0	0	0	1	0	0	0	1	0	1	0
0	0	0	0	0	0	0	971020	0	0	0	1281900				2	2	2	4.1	4.1	4.1	66.86	0	12.276	2721800	2	0	0	0	0	0	0	0	1132800	0	0	0	1589000	0	0	0	0	0	0	0	1	0	1	0	0
7305000	3660700	2794700	12285000	11031000	8045600	8900300	9716600	5554600	5372700	0	5704000				4	4	4	17.6	17.6	17.6	43.974	0	82.163	72940000	12	5292100	4572400	6221600	26117000	8728500	288880	134530	156720	10395000	6315400	0	4716800	0	1	1	1	3	2	1	1	0	2	0	0
204430000	216100000	254570000	2391400	3740900	3196200	742080	871480	306990	686860	673150	636520				18	18	9	51.7	51.7	30	45.205	0	294.47	866770000	35	189990000	224800000	399810000	7416500	9962600	6065200	4745700	4289600	514260	4716900	8297500	6165800	12	10	10	1	2	0	0	0	0	0	0	0
1767000	0	0	3479900	3580200	3230100	8181200	5909700	1220100	3395100	4331300	0				6	6	6	8.9	8.9	8.9	90.568	0	133.29	37933000	10	1172300	166970	169680	1869700	2815400	1391900	11245000	10927000	1400100	1889400	4528200	357760	1	0	0	1	0	0	2	2	1	2	1	0
0	0	3448600	13669000	13662000	9914800	1293500	0	3367700	13561000	4936800	3683400				4	4	4	7	7	7	67.791	0	32.227	67098000	17	0	0	4726100	9203400	14765000	5156000	102740	0	3908100	16765000	6412200	6059100	0	0	0	2	2	1	1	1	2	4	3	1
8462700	80474000	19148000	814120	631180	0	68721	1358500	84324	0	98042	0				15	15	15	45.5	45.5	45.5	52.602	0	253.39	141690000	32	28461000	62789000	45982000	935840	882410	0	20021	2401100	36419	0	184060	0	5	14	11	0	1	0	0	1	0	0	0	0
92640000	93088000	32263000	5164000	0	0	9524300	0	0	0	8088200	0				6	6	6	18.9	18.9	18.9	47.65	0	47.309	299750000	8	77864000	112600000	101110000	2531600	0	0	4215300	0	0	0	1429500	0	3	3	2	0	0	0	0	0	0	0	0	0
125220000	55223000	39744000	16796000	9192600	6581100	21859000	23193000	9689400	11805000	10566000	12481000				21	21	21	20.6	20.6	20.6	163.29	0	243.18	395860000	31	116970000	62914000	75177000	11838000	5805300	3797300	21079000	7309500	11710000	42744000	9266000	27246000	10	6	6	1	0	0	2	2	1	2	0	1
84966000	37826000	50656000	69812000	81315000	63157000	81122000	74496000	72476000	57000000	81097000	56769000				37	37	37	26.5	26.5	26.5	187.15	0	323.31	888010000	132	109200000	28646000	38823000	59571000	59982000	19075000	143010000	63384000	58312000	158550000	82998000	66457000	16	8	6	5	13	9	14	13	6	16	15	11
4719000	6723300	3281200	45443000	72081000	24844000	30811000	57374000	28784000	121740000	73456000	60909000				21	21	3	30.7	30.7	5	71.957	0	323.31	604620000	70	21776000	23452000	18837000	28779000	54816000	14638000	23710000	70524000	56878000	120070000	79302000	91840000	0	1	1	9	8	3	6	9	4	6	11	12
0	3886000	3533600	2703700	0	0	0	0	0	3182700	0	2276000				19	1	1	41.9	3	3	47.883	0	11.02	19306000	1	0	6169900	5355400	1701100	0	0	0	0	0	4145700	0	1933500	0	0	0	1	0	0	0	0	0	0	0	0
5850200	3263300	5103800	0	0	0	0	0	4690800	4833500	1680200	4260800				2	2	2	24.8	24.8	24.8	12.283	0	23.974	38796000	5	5314100	6109000	16629000	0	0	0	0	0	2825800	4035800	1694000	2188100	0	1	1	0	0	0	0	0	0	1	1	1
0	1105600	296440	112080	250340	0	136610	0	187240	0	197220	0				2	2	2	17	17	17	12.042	0	12.236	3002200	3	0	1646700	793600	24592	179300	0	62566	0	142020	0	153400	0	0	3	0	0	0	0	0	0	0	0	0	0
610230016	563449984	432460000	242650000	220110000	204100000	290769984	197950000	298120000	596760000	342400000	331390016				8	8	8	82.2	82.2	82.2	11.765	0	323.31	5042900000	159	728670000	271610000	336040000	124620000	159470000	172160000	379460000	341410000	821520000	771070000	368360000	568540000	17	12	11	12	13	14	14	9	17	15	15	10
62444000	20224000	41898000	38977000	26423000	18792000	37707000	41342000	40104000	123600000	67609000	52148000				11	11	11	30.2	30.2	30.2	49.439	0	157.51	681980000	28	50563000	34882000	41099000	22062000	23121000	8389700	56131000	41529000	80237000	178400000	88969000	56588000	1	1	0	1	0	1	3	3	1	9	5	3
4000199936	4615399936	3723399936	7508199936	6552099840	10757999616	2070800000	1676400000	2425400064	945929984	743640000	1083600000				30	30	29	76.8	76.8	76.8	30.777	0	323.31	43661000000	460	2717100000	4228300000	4343400000	4653600000	6705800000	6608900000	2425600000	3242000000	4373200000	1728800000	1268400000	1366000000	31	44	42	63	65	75	31	28	32	15	17	17
56927000	60016000	69022000	348230016	395990016	493600000	460449984	793990016	687710016	436080000	506409984	566329984				21	21	21	65	65	65	36.154	0	323.31	5438700000	110	30418000	45888000	58011000	208120000	249320000	300150000	637720000	1020800000	749750000	581750000	885120000	671670000	4	5	3	6	8	8	7	8	15	17	11	18
73075000	90057000	43052000	318560000	125590000	403430016	34566000	37572000	45073000	22526000	11138000	19403000				7	7	7	51.9	51.9	51.9	14.914	0	194.02	1041500000	58	78423000	53848000	81549000	141060000	66937000	289260000	46683000	84395000	87084000	50242000	7414500	54614000	5	5	2	11	5	13	7	4	2	2	1	1
347870016	388940000	477830016	5635899904	5039000064	8333400064	1637600000	1611699968	1470599936	689820032	598110016	472889984				36	36	36	66.5	66.5	66.5	69.756	0	323.31	23218000000	324	232640000	198310000	403660000	3999700000	3747800000	4449800000	2883200000	2619600000	1883500000	1305900000	1067000000	426470000	11	12	13	43	47	69	32	27	23	16	16	15
233860000	207180000	292420000	3926000128	3193100032	3236600064	643230016	616720000	632430016	335049984	220860000	206650000				33	33	29	70.1	70.1	63.3	55.928	0	323.31	11584000000	312	112180000	146670000	204930000	2328500000	3047000000	2281700000	1028600000	843850000	662030000	448460000	349460000	130240000	10	9	18	49	59	64	21	19	17	20	15	11
341020000	240310000	182580000	4591799808	3123399936	4095200000	974080000	861580032	633750016	574480000	323740000	242700000				32	32	18	67.3	67.3	49.9	49.496	0	323.31	13200000000	228	222810000	162550000	188410000	2781300000	2669300000	3042000000	1142000000	689130000	987090000	762940000	216210000	336170000	7	6	4	48	40	48	15	13	15	7	14	11
0	0	0	60651000	62587000	69149000	106030000	125860000	168680000	295240000	212100000	240590000				6	6	6	29	29	29	26.016	0	48.495	1687500000	19	0	0	0	9009900	23294000	14343000	80115000	92391000	201460000	597610000	185370000	483940000	0	0	0	0	0	1	3	2	2	6	1	4
7491600	3332500	3909100	42723000	37035000	24489000	111520000	136440000	187260000	1740400000	227660000	582860032				6	6	6	26.1	26.1	26.1	25.773	0	222.65	3812600000	34	2676900	718710	1038100	75904000	49665000	37498000	343770000	205610000	448010000	1230500000	439620000	977610000	0	0	0	3	3	1	4	3	5	6	4	5
4305800	4437400	1034000	653290	0	337050	473390	0	0	0	629990	485640				3	3	3	13	13	13	38.298	0	63.15	15538000	6	3079200	7985500	3618300	118720	0	74356	135940	0	0	0	301950	224370	1	1	1	0	0	1	0	0	0	0	1	1
11295000	7834200	6870900	0	0	0	0	0	0	0	0	0				3	3	3	12.4	12.4	12.4	38.177	0	18.94	32327000	3	10095000	8494200	13737000	0	0	0	0	0	0	0	0	0	2	0	1	0	0	0	0	0	0	0	0	0
7675900	3759600	5782800	31929000	28799000	31592000	15877000	20206000	5355900	10171000	24250000	5495700				12	12	12	6.5	6.5	6.5	239.62	0	148.73	166700000	22	3307400	4406000	11039000	37141000	26835000	23835000	16713000	10306000	7445700	13995000	3606200	8066700	3	1	2	4	3	2	1	1	1	2	1	1
508160	524860	534420	274030	222570	271560	303650	331610	46933	176670	229640	112790				2	2	2	6.5	6.5	6.5	38.999	0	12.545	4029800	3	616100	754560	946430	155730	166600	142460	311110	378890	65680	171660	240690	79860	0	1	0	0	0	0	0	0	1	1	0	0
18422000	38020000	27292000	0	0	0	0	0	0	0	0	0				4	2	2	29.4	20.9	20.9	23.511	0	43.818	112010000	7	7471300	83659000	20883000	0	0	0	0	0	0	0	0	0	1	2	4	0	0	0	0	0	0	0	0	0
11523000	70533000	62957000	7724500	0	6945900	13288000	1789900	1706700	6591800	2800600	2841200				4	4	3	11.7	11.7	8.4	39.34	0	93.893	247660000	7	15583000	103620000	93913000	1944000	0	2053200	6466300	1147600	3963100	11942000	1687500	5340700	2	2	1	0	0	0	0	0	0	1	0	1
521320000	596800000	609190016	10087000	513400	263750	2122700	575020	434610	763820	0	414320				35	35	35	57.3	57.3	57.3	77.063	0	323.31	2231200000	103	501790000	759720000	936580000	6501800	2865900	918070	7396400	3075000	1299500	8036700	0	3005400	31	35	36	1	0	0	0	0	0	0	0	0
15184000	24496000	17849000	0	0	0	0	0	0	0	0	0				4	4	4	11.7	11.7	11.7	51.676	0	39.578	73493000	5	16476000	29285000	27732000	0	0	0	0	0	0	0	0	0	1	3	1	0	0	0	0	0	0	0	0	0
0	0	0	11923000	25987000	18605000	21975000	16941000	32550000	24604000	31581000	46984000				12	12	12	18.9	18.9	18.9	70.108	0	86.086	260210000	20	0	0	0	10483000	10801000	16645000	20378000	17345000	13455000	83512000	26681000	60910000	0	0	0	0	0	0	1	3	4	4	1	7
5300000	5276500	2460900	0	2252200	4309800	6241900	4831000	5355600	6017300	1690800	3196000				2	2	2	4.6	4.6	4.6	54.305	0	18.809	54925000	5	4569400	5872700	4025300	0	2247700	1663900	10814000	5639900	7287500	7447600	1972700	3384500	0	0	1	0	1	0	0	0	0	1	2	0
116550000	19248000	20941000	1783100032	1859800064	1524099968	6052199936	9740600320	3999099904	4028499968	8325000192	4562400256				252	252	248	64	64	63.4	515.6	0	323.31	51351000000	1774	239480000	147540000	225750000	581360000	800620000	380690000	5515400000	7685300000	7958600000	9255100000	8294200000	10268000000	4	0	0	62	77	35	234	306	260	239	284	273
4645600	20148000	10973000	443190016	370329984	306070016	437640000	359860000	445940000	779360000	605750016	918560000				17	17	17	36.6	36.6	36.6	59.578	0	323.31	5347400000	208	10696000	40982000	38551000	282110000	317330000	171510000	541450000	407070000	682470000	940240000	837800000	1077100000	1	2	1	21	15	14	17	22	20	27	35	33
7577100	10412000	10334000	0	0	7457800	0	0	0	0	0	0				5	5	5	13.3	13.3	13.3	54.253	0	58.263	45372000	8	7259200	22370000	14747000	0	0	995010	0	0	0	0	0	0	2	3	3	0	0	0	0	0	0	0	0	0
32528000	3937300	22045000	13116000	35316000	14047000	24514000	27776000	24662000	5490400	18225000	17832000			+	17	17	11	28.4	28.4	19.1	66.038	0	318.02	269800000	47	26045000	3160000	29324000	4094400	47541000	3885100	17931000	59411000	26656000	9399700	20863000	21494000	4	0	5	2	6	4	4	8	3	1	4	6
0	0	0	4780500	4366800	5934900	3137400	4294700	3565100	1922800	7364000	5754400				3	3	3	8.6	8.6	8.6	45.674	0	21.67	40041000	5	0	0	0	4967200	75346	5397900	3927000	5391000	3636400	729450	7056600	8860500	0	0	0	0	0	1	1	0	0	1	2	0
0	515540	0	0	0	0	0	0	0	1912700	0	0				1	1	1	1.8	1.8	1.8	57.07	0	12.789	3299200	3	0	699520	0	0	0	0	0	0	0	2599700	0	0	0	0	0	0	0	0	1	1	0	1	0	0
387420	816460	276700	226330	1209300	477670	406960	619780	1820800	328670	2121600	771650				3	3	3	29.8	29.8	29.8	13.38	0	23.677	11922000	8	1133700	147040	1748500	26685	149750	60638	92409	163360	2049600	2242800	1752100	2355000	1	1	1	0	1	0	0	0	1	1	1	1
16089000	14360000	8060200	75729000	87783000	66194000	55074000	49034000	28432000	52863000	64040000	35790000			+	15	15	15	25.6	25.6	25.6	85.696	0	232.97	560530000	45	7943700	14274000	18071000	72302000	81005000	34387000	46792000	29146000	26266000	95593000	89783000	44965000	2	2	1	5	12	3	3	2	3	4	5	3
134950000	65076000	80115000	65282000	44784000	57601000	20603000	17190000	13185000	11397000	12561000	4739500				10	10	9	24.5	24.5	21.5	45.371	0	114.63	570460000	19	91540000	128890000	149420000	39339000	45794000	36233000	12936000	19704000	18444000	14714000	8202800	5243400	3	3	1	3	4	0	0	0	1	0	2	2
1983900	2314500	1901700	5630900	3723300	0	17697000	4948400	6926600	29365000	8545200	13992000				7	7	7	16.3	16.3	16.3	65.163	0	189.67	118920000	16	1141300	1769000	1105500	2029900	4855900	0	17561000	6022800	3167900	45318000	18714000	17234000	1	2	1	1	0	0	1	1	1	3	2	3
0	0	0	0	0	0	0	0	0	2479100	0	2529500				2	2	2	17.8	17.8	17.8	22.277	0	21.765	6558100	4	0	0	0	0	0	0	0	0	0	3974600	0	2583600	0	0	0	0	0	0	0	0	1	2	0	1
802850	3622000	1353700	0	0	0	0	0	0	0	0	0				4	4	4	15.3	15.3	15.3	45.14	0	71.552	7632300	5	750360	5631500	1250400	0	0	0	0	0	0	0	0	0	1	2	2	0	0	0	0	0	0	0	0	0
2084300	0	1883200	14531000	4908300	1717000	45601000	22150000	17889000	7566200	30640000	11511000				8	8	8	17	17	17	501.31	0	91.086	189340000	28	494160	0	574550	6347500	3172300	167750	35304000	41377000	29641000	23484000	30072000	18702000	0	0	0	2	1	0	6	4	5	1	6	3
0	3204200	0	0	0	0	0	0	0	0	0	0				2	2	2	1.8	1.8	1.8	139.09	0	11.671	4347700	2	0	4347700	0	0	0	0	0	0	0	0	0	0	0	1	1	0	0	0	0	0	0	0	0	0
11311000	21500000	15549000	0	0	0	2096300	381740	259490	481730	0	977600				6	6	6	20.4	20.4	20.4	54.565	0	67.067	67584000	10	10337000	26474000	23408000	0	0	0	4228200	246690	166930	1805100	0	918360	2	4	4	0	0	0	0	0	0	0	0	0
581619968	261830000	258630000	52994000	70325000	50894000	119210000	148700000	60205000	143720000	90395000	72348000				6	6	2	82.1	82.1	27.4	11.265	0	280.57	2308100000	47	42330000	251190000	278760000	34334000	102280000	35875000	323240000	246720000	194420000	354620000	344580000	99726000	6	6	6	1	3	3	5	2	3	5	2	5
13283000	13654000	8019500	3095400	9737700	6906700	3111300	6306700	4749000	5560800	5230300	4418000				7	7	7	23.3	23.3	23.3	48.803	0	145.62	105260000	14	13037000	27967000	25619000	2288400	854190	342810	218650	4623200	10922000	8524400	3711200	7148800	4	2	1	2	0	0	0	2	1	1	1	0
0	0	0	0	0	0	0	0	0	0	0	0				1	1	1	1.9	1.9	1.9	104.79	0	28.125	0	1	0	0	0	0	0	0	0	0	0	0	0	0	0	1	0	0	0	0	0	0	0	0	0	0
0	87324	0	0	0	0	618960	0	0	0	0	0				1	1	1	7	7	7	22.963	0	7.5957	795150	1	0	118490	0	0	0	0	676660	0	0	0	0	0	0	0	0	0	0	0	1	0	0	0	0	0
16919000	15389000	72303000	0	3868400	0	0	0	0	2676600	0	3747400				7	7	5	39.8	39.8	31.3	23.602	0	179.76	148360000	14	27173000	53252000	63196000	0	1610100	0	0	0	0	1123100	0	2007700	1	5	8	0	0	0	0	0	0	0	0	0
2357100	0	702510	0	1685700	0	5625600	2843800	4017600	2187100	869300	2024700				3	3	3	4	4	4	105.21	0	25.288	26631000	6	2930400	0	189910	0	916170	0	4992300	3622500	5532500	5459800	674860	2312200	1	0	0	0	1	0	2	0	2	0	0	0
982040	955570	0	0	0	0	0	0	0	0	0	0			+	2	2	2	2.4	2.4	2.4	101.39	0	11.711	7967400	2	982040	1296600	0	0	0	0	0	0	3607600	2081200	0	0	1	0	0	0	0	0	0	0	1	0	0	0
4476900	2877100	520500	1299200	0	0	0	0	219800	0	0	0				3	3	3	9.5	9.5	9.5	60.556	0	35.172	10589000	5	5069000	2584000	2364700	404220	0	0	0	0	167430	0	0	0	2	1	1	1	0	0	0	0	0	0	0	0
7012000	11715000	6543900	0	0	0	0	0	0	0	0	0				5	5	5	23.8	23.8	23.8	34.258	0	140.43	32325000	10	6883700	15047000	10394000	0	0	0	0	0	0	0	0	0	2	5	3	0	0	0	0	0	0	0	0	0
0	0	0	10253000	10142000	8569200	3556300	5434000	4379300	2285400	1939300	2298600				6	6	6	21.1	21.1	21.1	39.731	0	167.08	45009000	20	0	0	0	7018600	13675000	3980900	2453400	6090300	4601600	3033800	1939500	2215900	0	1	0	2	4	3	0	3	2	2	1	2
1330300	3236200	1349900	3315600	4553000	8405000	4276800	5700200	4246000	7430600	18242000	12240000				5	5	5	11.4	11.4	11.4	66.034	0	91.331	85060000	15	598620	1118500	877880	2373500	4424600	3443900	6763600	14319000	6588200	10846000	21110000	12597000	0	0	0	1	1	2	2	1	1	3	3	1
0	1149900	575670	0	0	0	0	0	0	0	0	0				2	2	2	7.2	7.2	7.2	46.312	0	37.889	2386900	2	0	1425200	961750	0	0	0	0	0	0	0	0	0	0	0	2	0	0	0	0	0	0	0	0	0
6247000	5140400	5952700	0	0	0	0	0	0	0	0	0				7	7	7	14.7	14.7	14.7	69.068	0	101.97	21831000	9	5852600	7720300	8258000	0	0	0	0	0	0	0	0	0	3	4	2	0	0	0	0	0	0	0	0	0
0	1421800	0	0	0	0	0	0	0	0	0	0			+	2	2	2	7.7	7.7	7.7	38.429	0	48.849	1929300	3	0	1929300	0	0	0	0	0	0	0	0	0	0	1	1	1	0	0	0	0	0	0	0	0	0
0	0	0	9483200	3315800	11067000	7089900	8437500	15766000	13944000	4965200	17242000				3	3	3	18.1	18.1	18.1	14.553	0	23.665	105250000	3	0	0	0	4177400	3385700	4883900	4625100	6407500	19335000	22423000	8785100	31230000	0	0	0	0	1	0	0	0	0	0	2	0
13466000	17489000	11342000	0	0	0	0	0	0	0	0	0				6	6	4	53.1	53.1	40.1	15.998	0	141.84	52876000	10	15288000	17731000	19858000	0	0	0	0	0	0	0	0	0	3	4	3	0	0	0	0	0	0	0	0	0
0	0	0	0	0	0	19004000	21122000	23527000	1715400	0	0				7	7	7	14.4	14.4	14.4	59.864	0	88.505	80133000	12	0	0	0	0	0	0	15427000	23036000	39875000	1794200	0	0	0	0	0	0	0	0	2	5	5	0	0	0
10208000	16374000	5847700	14150000	9927400	9647300	6507400	7687900	3875000	1478600	4577500	2794900				7	7	7	9.2	9.2	9.2	103.36	0	48.339	101800000	20	20783000	6962600	29488000	7312900	4364000	5273800	400050	4818300	6081100	11784000	331030	4197700	2	4	1	3	2	1	1	3	1	0	1	1
0	0	0	0	0	0	0	0	0	0	0	493660				1	1	1	22.5	22.5	22.5	13.988	0	29.361	611930	1	0	0	0	0	0	0	0	0	0	0	0	611930	0	0	0	0	0	0	0	0	0	0	0	1
4934000	4975500	2642300	0	2952500	0	5479500	1348200	787400	5069800	5693000	1499400				1	1	1	0.2	0.2	0.2	771.15	0	9.2995	53104000	3	4997900	6857600	3095800	0	2351100	0	6283700	1033800	1149500	7043100	16184000	4108400	0	0	0	0	0	0	0	0	1	0	1	1
0	0	0	0	0	0	0	0	220020	0	0	0				1	1	1	2.9	2.9	2.9	35.026	0	7.0805	290600	1	0	0	0	0	0	0	0	0	290600	0	0	0	0	0	0	0	0	0	0	0	1	0	0	0
0	0	0	0	0	0	0	0	0	996720	0	986270				1	1	1	1.1	1.1	1.1	102.51	0	7.5215	2577200	1	0	0	0	0	0	0	0	0	0	1354700	0	1222500	0	0	0	0	0	0	0	0	0	0	0	1
743410	512190	833090	0	0	0	0	0	0	0	0	0				2	2	2	5.2	5.2	5.2	62.216	0	11.244	2646600	2	689040	725040	1232500	0	0	0	0	0	0	0	0	0	0	1	1	0	0	0	0	0	0	0	0	0
0	0	0	0	0	0	3528400	4550400	9261100	8857100	6984200	13523000				1	1	1	3.3	3.3	3.3	52.263	0	13.352	86196000	9	0	0	0	0	0	0	3857300	5308500	22648000	12038000	17629000	24716000	0	0	0	0	0	1	1	1	2	1	1	2
0	0	0	0	0	0	0	0	0	0	0	40009000				1	1	1	1.4	1.4	1.4	99.914	0	6.1954	246150000	0	0	0	0	3883100	3236100	2931100	38629000	48980000	50808000	3273300	44820000	49594000	0	0	0	0	0	0	0	0	0	0	0	0
0	0	0	0	0	0	1096400	2554300	3628600	3119600	1438300	3320900				2	2	2	5.1	5.1	5.1	48.506	0	12.541	19221000	3	0	0	0	0	0	0	1317700	2497700	5706700	4340400	873000	4486000	0	0	0	0	0	0	1	0	0	1	0	1
[truncated: 6 more columns]

## Sheet: table3
Table 3. Data transformed by log 2
LFQ intensity Plasma1	LFQ intensity Plasma2	LFQ intensity Plasma3	LFQ intensity NUAP1	LFQ intensity NUAP2	LFQ intensity NUAP3	LFQ intensity ZFP1	LFQ intensity ZFP2	LFQ intensity ZFP3	LFQ intensity ZWP1	LFQ intensity ZWP2	LFQ intensity ZWP3	Only identified by site	Reverse	Potential contaminant	Peptides	Razor + unique peptides	Unique peptides	Sequence coverage [%]	Unique + razor sequence coverage [%]	Unique sequence coverage [%]	Mol. weight [kDa]	Q-value	Score	Intensity	MS/MS count	Intensity Plasma1	Intensity Plasma2	Intensity Plasma3	Intensity NUAP1	Intensity NUAP2	Intensity NUAP3	Intensity ZFP1	Intensity ZFP2	Intensity ZFP3	Intensity ZWP1	Intensity ZWP2	Intensity ZWP3	MS/MS count Plasma1	MS/MS count Plasma2	MS/MS count Plasma3	MS/MS count NUAP1	MS/MS count NUAP2	MS/MS count NUAP3	MS/MS count ZFP1	MS/MS count ZFP2	MS/MS count ZFP3	MS/MS count ZWP1	MS/MS count ZWP2	MS/MS count ZWP3
#!{Type}E	E	E	E	E	E	E	E	E	E	E	E	C	C	C	N	N	N	N	N	N	N	N	N	N	N	N	N	N	N	N	N	N	N	N	N	N	N	N	N	N	N	N	N	N	N	N	N	N	N
28.7592	29.7571	28.0962	22.2685	22.5361	19.8364	21.1591	19.5376	18.884	19.4457	20.5136	18.9477				25	25	25	61.7	61.7	61.7	46.708	0	323.31	2121200000	84	473680000	863930000	717700000	8373300	10076000	3632900	4405300	13647000	5756900	4313800	10399000	5290000	22	26	30	2	2	0	0	1	0	1	0	0
25.0588	22.7213	24.7222	21.8603	21.1808	20.6602	22.4348	21.8407	22.7051	22.8442	22.4632	23.0591				1	1	1	7.8	7.8	7.8	12.586	0	6.2754	139680000	2	23136000	14040000	26096000	2698200	1945500	718470	8398200	4831900	13440000	15980000	10175000	18223000	1	0	1	0	0	0	0	0	0	0	0	0
NaN	NaN	NaN	19.3654	NaN	19.7364	21.6552	NaN	NaN	NaN	NaN	NaN				1	1	1	8.7	8.7	8.7	12.441	0	6.2085	4558800	2	0	0	0	431140	0	517020	3610600	0	0	0	0	0	0	0	0	0	0	1	1	0	0	0	0	0
23.7512	22.7612	23.9068	21.842	NaN	21.567	20.5731	20.8995	21.505	21.3585	20.1371	21.8241				1	1	1	13.9	13.9	13.9	12.332	0	90.908	68824000	3	10964000	15743000	17395000	1863200	0	2277600	1678800	2422200	4799200	4313100	1319800	6048900	1	0	1	1	0	0	0	0	0	0	0	0
NaN	NaN	NaN	NaN	NaN	NaN	NaN	NaN	18.9791	19.2962	20.0111	NaN				1	1	1	9.3	9.3	9.3	12.891	0	6.3172	2922200	1	0	0	0	0	0	0	0	0	630440	1006900	1284900	0	0	0	0	0	0	0	0	0	0	0	1	0
NaN	NaN	NaN	NaN	14.8504	NaN	15.0469	15.2541	14.9866	15.0109	17.8798	14.9648				1	1	1	11.1	11.1	11.1	13.012	0	6.5797	542560	1	0	0	0	0	31323	0	48196	68552	53569	57009	235140	48775	0	0	0	0	0	0	0	0	0	0	1	0
NaN	NaN	NaN	NaN	NaN	NaN	NaN	NaN	NaN	19.1971	NaN	NaN				1	1	1	7.8	7.8	7.8	12.534	0	7.0244	816890	1	0	0	0	0	0	0	0	0	0	816890	0	0	0	0	0	0	0	0	0	0	0	1	0	0
26.6782	25.4458	26.4093	17.284	NaN	17.2817	NaN	NaN	NaN	NaN	NaN	NaN				9	9	9	88.7	88.7	88.7	12.633	0	199.9	311470000	52	78972000	133640000	98629000	123930	0	99485	0	0	0	0	0	0	14	17	20	1	0	0	0	0	0	0	0	0
19.4148	NaN	NaN	NaN	NaN	NaN	NaN	NaN	19.902	19.8157	19.4312	NaN				1	1	1	5.1	5.1	5.1	18.118	0	6.8748	4204800	1	551470	0	0	0	0	0	0	0	1431300	1306600	915500	0	0	0	0	0	0	0	0	0	0	0	1	0
21.594	NaN	NaN	NaN	NaN	NaN	22.4722	22.5726	23.0719	24.3822	22.913	23.0562				7	7	7	12.8	12.8	12.8	75.905	0	119.34	79427000	19	975830	0	0	0	0	0	6791700	8084100	14644000	26940000	8349600	13642000	0	0	0	0	0	0	3	3	2	5	3	3
21.8722	22.7982	23.1843	26.3072	27.3317	27.8547	25.6427	27.6326	26.4253	24.6779	26.2483	24.969				3	3	3	20.2	20.2	20.2	23.353	0	22.462	970690000	17	2050300	5285800	7251400	52548000	164790000	150820000	58315000	227180000	123280000	35936000	100150000	43084000	1	1	1	3	3	2	0	0	2	1	1	2
NaN	NaN	NaN	21.7244	20.5913	NaN	NaN	20.6191	21.0671	23.0737	22.7107	22.5188				4	4	4	1.9	1.9	1.9	252.23	0	45.333	37830000	8	0	0	0	1308800	631840	0	0	2723400	576510	13497000	9513100	9578400	0	0	0	0	1	1	0	1	0	1	3	1
28.6628	27.2682	27.098	28.0952	28.5105	27.1229	28.372	28.2845	28.7582	29.6019	28.7968	28.827				13	13	6	45.6	45.6	26.1	43.911	0	323.31	5029200000	207	199340000	103100000	99828000	136850000	424240000	210220000	511780000	581980000	767060000	531960000	720050000	742780000	9	5	4	14	17	9	25	21	19	32	24	28
NaN	NaN	NaN	NaN	NaN	NaN	NaN	NaN	NaN	NaN	NaN	NaN				1	1	1	3	3	3	47.428	0	6.4303	0	1	0	0	0	0	0	0	0	0	0	0	0	0	0	0	0	0	0	0	0	0	0	1	0	0
NaN	NaN	NaN	NaN	NaN	NaN	NaN	NaN	16.8101	17.6806	NaN	NaN				1	1	1	9.4	9.4	9.4	13.508	0	7.5957	437300	1	0	0	0	0	0	0	0	0	151770	285520	0	0	0	0	0	0	0	0	0	0	0	1	0	0
NaN	NaN	17.796	NaN	NaN	NaN	20.6948	NaN	18.5853	NaN	19.5179	18.4904				2	1	1	16.8	10.9	10.9	12.926	0	7.7281	4205800	1	0	0	182820	0	0	0	1304000	0	506360	0	1796000	416610	0	0	0	0	0	0	1	0	0	0	0	0
21.1809	NaN	NaN	NaN	NaN	NaN	NaN	NaN	NaN	19.2738	20.0737	NaN				3	2	2	28.2	18.8	18.8	12.839	0	11.025	4593500	2	2691600	0	0	0	0	0	0	0	0	1336200	565680	0	1	0	0	0	0	0	0	0	0	1	0	0
24.1218	24.0996	24.2423	22.3717	23.0544	23.0083	23.4038	24.519	23.263	23.2219	22.9218	23.6206				6	2	2	39.5	12.6	12.6	23.15	0	37.884	185370000	21	17175000	24947000	34820000	3331100	7814800	5040000	18131000	28481000	12824000	15769000	1626200	15408000	3	5	4	1	1	2	1	1	1	1	1	0
20.7439	NaN	20.2625	NaN	NaN	NaN	21.4271	22.4237	NaN	NaN	NaN	21.8456				2	1	1	30.6	11.2	11.2	10.657	0	14.107	17849000	4	1655800	0	1759000	0	0	0	3403400	6444200	0	0	0	4586600	0	1	1	0	0	0	0	1	0	0	0	1
NaN	NaN	NaN	NaN	NaN	NaN	NaN	19.9043	20.5836	20.4097	20.4105	20.5073				2	2	2	21.6	21.6	21.6	12.515	0	11.958	12649000	2	1083000	1561000	1264200	0	0	0	0	1233600	2195900	1775400	1681900	1853900	0	1	0	0	0	0	0	1	0	0	0	0
NaN	NaN	NaN	NaN	NaN	NaN	23.5724	21.3889	NaN	22.8763	21.9066	21.5213				2	2	2	23.9	23.9	23.9	12.82	0	70.159	36787000	4	0	0	0	0	0	0	11636000	2551700	0	15175000	4313800	3111300	0	0	0	0	0	0	1	0	1	1	1	0
NaN	NaN	NaN	NaN	17.5346	NaN	19.4946	19.4217	17.9393	19.4336	19.8114	NaN				1	1	1	9.4	9.4	9.4	12.772	0	11.001	4281600	6	0	0	0	0	177120	0	807550	819310	331980	962430	1183200	0	0	0	0	0	0	0	1	1	1	1	1	1
NaN	NaN	NaN	25.0556	24.8707	25.3748	24.8696	24.2962	24.8054	24.7795	24.2492	24.3924				1	1	1	7.8	7.8	7.8	12.943	0	7.0232	260920000	2	0	0	0	22821000	27523000	29493000	32214000	18939000	36409000	36469000	27632000	29416000	0	0	0	0	0	0	0	0	0	0	1	1
NaN	NaN	NaN	NaN	NaN	NaN	21.4538	21.2106	20.4679	22.2212	21.8951	20.8053				1	1	1	13	13	13	12.537	0	12.989	21802000	4	0	0	0	0	0	0	3104100	3019400	1893500	6568800	4957800	2258300	0	0	0	0	0	0	1	0	1	1	1	0
25.234	24.4746	24.8386	24.1269	23.0439	23.7639	24.7272	24.3675	24.4358	26.4592	23.132	25.7695				21	21	21	18.5	18.5	18.5	187.67	0	259.7	446180000	47	43597000	32356000	36365000	6496600	7179600	4893000	21363000	19014000	28545000	139200000	12906000	94263000	2	1	5	3	4	2	5	3	2	8	3	9
21.2882	21.1975	21.1253	22.4211	23.1614	21.8849	22.3934	22.9391	24.4041	24.3215	23.7674	23.4992				4	4	3	32.5	32.5	23.1	12.965	0	82.169	127440000	16	3065600	3181900	4075700	4258800	8136200	4076100	16255000	10427000	15745000	30631000	14916000	12667000	0	1	0	1	1	0	1	1	2	4	2	3
NaN	NaN	NaN	NaN	NaN	NaN	21.9163	21.8014	22.117	22.1819	21.0182	22.2066				1	1	1	12.6	12.6	12.6	11.603	0	6.8344	29945000	1	0	0	0	0	0	0	4377700	3983600	6985600	7865200	1482600	5250500	0	0	0	0	0	0	0	0	0	0	0	1
22.1429	21.0091	21.8908	24.2286	23.6455	24.1283	23.5678	22.5445	23.7543	24.1425	23.088	24.9924				3	3	3	14.5	14.5	14.5	35.116	0	56.634	168600000	7	2869100	2630600	3284700	11162000	9839300	10948000	12346000	7347900	20154000	27744000	9227700	51045000	0	1	0	3	1	0	0	1	1	0	0	0
25.1602	21.6392	22.3509	22.3872	24.4411	22.9084	23.3772	24.8177	23.7085	21.8815	24.0505	23.6621			+	11	11	9	16.7	16.7	14	59.51	0	278.33	191930000	29	31094000	2497500	2911700	1808700	17623000	3233500	16817000	41076000	21588000	5612900	25934000	21736000	5	1	1	1	4	1	0	6	2	2	3	3
22.5055	22.1867	23.5838	25.198	26.2142	25.7859	25.5106	25.4635	25.1364	26.0383	26.0149	25.283				13	7	5	47.2	32.6	25.2	41.215	0	213.56	560210000	51	29196000	18547000	15631000	37038000	61207000	19262000	44869000	48855000	35197000	92464000	106030000	51906000	1	1	2	3	5	5	6	7	3	6	7	5
27.1069	27.4934	27.0576	24.0495	23.1586	24.3734	23.8538	24.1671	23.5472	25.8743	23.8884	24.9403				10	10	10	31.4	31.4	31.4	42.848	0	156.9	843970000	24	123370000	243550000	172120000	6619300	4716800	4509000	43473000	22616000	26614000	93607000	25255000	77526000	2	7	7	0	0	0	1	2	1	2	1	1
23.9385	23.2413	23.0173	19.9797	20.4582	19.7323	20.2365	20.7085	21.5257	23.0519	22.1175	22.5417				10	4	3	35.4	18.2	14.7	43.805	0	50.347	75077000	25	20889000	10583000	9545200	237680	4031100	212550	5300100	1679200	1647200	5406300	7360500	8184400	7	1	1	1	0	1	2	2	1	4	3	2
19.643	18.0028	NaN	20.0105	20.8446	17.3846	NaN	NaN	NaN	19.1889	NaN	19.3811				2	2	2	9.8	9.8	9.8	23.845	0	13.351	6047900	2	1827900	255280	0	87306	1056600	5536.4	0	0	0	1323800	0	1491600	0	0	0	1	0	0	0	0	0	0	0	1
NaN	NaN	NaN	16.6966	NaN	NaN	NaN	NaN	NaN	14.2877	NaN	NaN				3	1	1	29.9	11.2	11.2	13.842	0	6.4495	94979	1	0	0	0	67796	0	0	0	0	0	27183	0	0	0	0	0	1	0	0	0	0	0	0	0	0
18.4047	18.3337	19.294	19.3542	21.1288	NaN	24.0819	24.1556	23.6347	26.4956	24.8399	24.3191				6	6	6	11.3	11.3	11.3	80.173	0	97.299	251690000	16	270240	349070	417460	568480	2021300	0	23211000	23212000	20145000	89500000	33998000	57992000	1	1	0	0	0	0	2	0	2	5	1	4
NaN	20.4019	20.6502	19.1971	20.3091	NaN	19.8955	NaN	19.9275	20.956	18.8594	19.4426				3	3	1	36.6	36.6	10.9	11.167	0	19.037	12770000	3	0	1595100	2362600	428570	51682	0	1868900	0	804440	4271800	540660	846540	0	0	0	0	0	0	0	0	0	1	0	2
25.9349	26.0056	25.5762	23.8221	23.3844	23.4005	22.2301	21.3026	21.8212	24.941	22.5474	24.8099				14	14	14	31.3	31.3	31.3	53.213	0	323.31	366650000	51	61852000	99528000	92076000	5589900	5567800	3696400	4630800	1744500	3591300	41728000	7883300	38758000	8	8	8	2	2	2	4	1	1	8	2	5
19.8687	20.1423	NaN	NaN	19.75	NaN	21.2046	21.3321	21.4811	NaN	21.4401	23.6694				1	1	1	0.9	0.9	0.9	145.62	0	7.9581	33301000	2	831290	1499000	0	0	685400	0	3644700	2400900	5870100	0	5476800	12893000	0	0	0	0	0	0	0	1	0	0	0	1
23.2819	23.7303	23.5299	22.7265	21.5022	21.8294	20.8592	NaN	21.2229	20.4634	NaN	20.8636				6	6	6	30.2	30.2	30.2	30.67	0	59.978	71612000	15	14242000	24965000	25949000	697300	1407500	764600	397580	0	1085700	932250	0	1171400	2	1	2	0	1	2	0	1	3	2	0	1
NaN	NaN	NaN	28.4388	26.4922	27.8944	25.3235	25.7026	25.4854	24.4527	23.8963	23.8755				1	1	1	1.5	1.5	1.5	52.991	0	8.6	691200000	8	0	0	0	274370000	26777000	152530000	46108000	80837000	77055000	5923900	3351500	24251000	0	0	0	2	0	2	2	1	0	0	0	1
23.5063	23.8155	24.2179	23.6662	22.8504	22.624	23.3059	22.7187	23.7158	23.1257	22.8434	23.5445				1	1	1	13.7	13.7	13.7	12.815	0	127.93	152890000	11	11684000	18278000	26172000	8623300	7076800	4660300	11310000	6050400	20341000	12132000	10145000	16420000	0	0	0	2	0	1	2	1	1	1	1	2
22.3868	21.7312	22.5158	NaN	NaN	20.5951	21.1813	20.7262	21.0716	22.0652	21.2967	20.831				1	1	1	17.1	17.1	17.1	8.1675	0	10.268	38749000	10	5680900	4717700	8531300	0	0	936380	2596400	2021000	2690600	5956800	3308600	2309200	0	1	1	1	1	1	1	1	0	1	1	1
21.3152	20.29	20.6895	23.178	22.3471	24.6938	23.623	23.057	22.4896	21.6715	22.1138	22.3498				6	6	6	26.5	26.5	26.5	24.158	0	106.34	96244000	16	2600200	1578500	2418900	7287100	8898300	5025500	8775900	12127000	12264000	8672000	14978000	11618000	0	0	1	2	1	1	1	3	2	1	1	3
NaN	NaN	NaN	22.49	22.0435	22.1708	24.0235	25.2924	NaN	23.72	23.9746	24.2664				1	1	1	2	2	2	76.736	0	7.139	147580000	1	0	0	0	1809100	1423700	1077700	25967000	26346000	0	21195000	28540000	41226000	0	0	0	0	0	0	0	1	0	0	0	0
16.234	NaN	NaN	NaN	24.9406	17.2206	16.8494	21.7522	17.5032	18.4534	19.8127	17.2644			+	6	2	0	9.9	3	0	63.165	0	12.252	40397000	3	42670	0	0	0	14456000	780790	3893800	9569900	716400	1122300	6989500	2825500	0	0	0	0	1	0	0	2	0	0	0	0
28.0902	27.4277	28.0157	27.6599	27.9012	27.1088	28.4313	27.6848	28.2005	28.2329	28.9383	27.904			+	4	4	4	25.1	25.1	25.1	24.409	0	102.7	4012700000	32	34005000	176350000	54274000	54653000	164500000	41248000	411050000	560130000	480590000	751490000	803710000	480700000	2	2	2	1	4	2	3	4	3	2	4	3
21.061	19.6809	NaN	19.5098	NaN	NaN	NaN	NaN	NaN	NaN	NaN	NaN			+	4	4	2	36.6	36.6	19	15.184	0	26.552	4230900	8	2644900	1556800	0	29247	0	0	0	0	0	0	0	0	6	1	1	0	0	0	0	0	0	0	0	0
18.1889	NaN	NaN	18.2628	18.9058	NaN	18.6006	NaN	NaN	NaN	18.5116	17.9381			+	3	1	1	6.1	2.8	2.8	51.621	0	6.5521	2159300	1	235750	0	0	192550	594170	0	456120	0	0	0	474260	206430	0	0	0	1	0	0	0	0	0	0	0	0
NaN	NaN	NaN	23.6016	21.019	21.268	20.6821	20.1561	19.8878	NaN	NaN	NaN			+	5	1	1	9.3	2.6	2.6	56.44	0	8.9873	18034000	3	0	0	0	7083800	1728200	4200900	2339200	1444600	1237500	0	0	0	0	0	0	1	1	1	0	0	0	0	0	0
33.6936	34.3113	33.9139	29.6777	29.3304	28.2135	28.657	28.3128	27.4509	28.6679	28.427	27.8111			+	57	57	52	79	79	73.9	69.366	0	323.31	68138000000	867	20293000000	23169000000	21484000000	506650000	355030000	94046000	472540000	343740000	251710000	455790000	383540000	329620000	198	197	208	61	45	28	30	25	8	26	22	19
22.9367	22.3224	21.5961	NaN	NaN	22.3241	21.8019	NaN	23.0374	20.5473	20.8364	22.51			+	12	7	7	20.4	14.2	14.2	69.293	0	45.632	51797000	15	11232000	8348600	7741800	0	0	1715800	890690	393990	8527100	730040	1553900	10663000	5	1	1	1	0	0	0	0	3	1	1	2
20.7648	19.7824	19.8134	20.3865	19.2596	19.8645	19.5661	19.0496	18.5977	19.9641	19.1712	19.9479			+	4	3	3	18.7	15.3	15.3	38.418	0	38.565	13573000	49	520820	363910	395610	663580	1014800	1433600	1223200	1109400	2756400	398590	365170	3327700	3	6	5	7	4	4	2	0	2	7	4	5
17.9004	NaN	NaN	16.4905	NaN	NaN	15.584	NaN	NaN	15.7095	NaN	NaN			+	2	1	1	10.9	4.9	4.9	30.276	0	12.334	493780	5	201030	0	0	93750	0	0	79247	0	0	119750	0	0	4	0	0	0	0	0	0	0	0	1	0	0
19.5645	16.5764	16.7998	19.8469	NaN	16.4594	15.4946	NaN	NaN	16.481	15.8886	NaN			+	2	2	2	7.7	7.7	7.7	46.103	0	18.003	2432000	14	963810	106270	129060	741840	0	155220	27803	0	0	258760	49265	0	7	1	0	4	0	0	0	0	0	2	0	0
NaN	NaN	20.561	18.3753	20.3385	20.0713	19.0904	21.444	19.4262	NaN	20.5866	19.1673			+	5	5	5	11.9	11.9	11.9	62.129	0	93.126	12007000	15	0	0	1888100	187590	1833400	493800	258490	3306800	2336100	0	1337600	365420	0	0	2	1	1	2	1	2	2	0	2	2
17.3378	NaN	NaN	NaN	19.8855	17.5826	18.1585	18.9638	18.2667	NaN	19.5706	17.5007			+	6	2	2	10.9	5	5	65.865	0	11.095	3514900	2	62719	0	0	0	2000500	52126	28528	374690	300280	0	598640	97441	0	0	0	0	0	0	0	1	0	0	1	0
NaN	NaN	NaN	NaN	NaN	NaN	NaN	NaN	NaN	NaN	NaN	NaN			+	1	1	1	6.2	6.2	6.2	21.653	0	13.799	0	1	0	0	0	0	0	0	0	0	0	0	0	0	0	0	0	0	0	0	0	0	0	1	0	0
21.1797	22.0597	21.7362	21.5159	22.1117	21.8605	21.0085	21.6295	20.2462	20.5203	21.3526	19.3329			+	2	1	1	6.1	2.9	2.9	43.017	0	29.25	34643000	2	2271600	4609500	5770700	2056600	5584600	2728800	2078500	2941300	1136700	1555300	3496500	412730	0	1	0	0	0	0	0	1	0	0	0	0
17.3593	NaN	NaN	16.6026	NaN	NaN	14.6971	NaN	NaN	15.6707	NaN	NaN			+	4	2	2	24.9	15.4	15.4	22.06	0	47.333	470810	9	332040	0	0	53928	0	0	24654	0	0	60188	0	0	6	0	0	2	0	0	0	0	0	1	0	0
22.6274	19.35	21.3549	26.5832	26.4805	26.712	26.3693	27.1955	28.0009	29.771	26.8876	29.4672				8	8	8	45	45	45	26.459	0	190.9	3218600000	94	2343700	122350	1029800	70167000	57321000	24745000	154320000	117010000	419470000	1022300000	221500000	1128300000	0	0	0	5	4	1	7	10	10	23	12	22
25.4252	26.6363	26.6413	17.5462	16.9854	19.9802	18.7529	20.1769	NaN	18.5386	17.9261	17.3814				12	12	12	30.9	30.9	30.9	53.02	0	174.79	326500000	32	79780000	101550000	136880000	108030	107030	326750	1425000	1321400	0	2606200	818930	1577000	4	11	10	1	1	2	0	2	0	1	0	0
NaN	NaN	14.2235	15.139	NaN	15.6087	NaN	18.1625	17.1041	NaN	17.326	16.5523				1	1	1	2.4	2.4	2.4	55.389	0	7.0855	918750	4	0	0	30479	30195	0	42059	0	325230	176820	0	200770	113200	0	0	0	0	0	0	0	1	1	0	1	1
NaN	NaN	NaN	NaN	NaN	NaN	NaN	NaN	NaN	23.93	21.8837	21.4085				2	2	2	8	8	8	45.147	0	18.295	39082000	3	261420	0	425050	1261200	0	0	4447700	1026100	1567200	21551000	3847700	4694400	0	0	0	0	0	0	0	0	0	2	1	0
NaN	NaN	NaN	NaN	NaN	NaN	NaN	NaN	NaN	NaN	NaN	NaN				1	1	1	2.9	2.9	2.9	50.753	0.0068493	6.159	0	1	0	0	0	0	0	0	0	0	0	0	0	0	0	0	0	0	0	1	0	0	0	0	0	0
24.2843	22.2566	22.9476	20.6833	19.6449	NaN	21.5122	21.3434	21.3066	NaN	20.9313	20.7199				7	7	7	11.5	11.5	11.5	97.712	0	96.809	56470000	11	18588000	9818600	13168000	943980	327010	0	1837200	4307800	4445700	0	2682100	351740	4	3	3	0	0	0	0	0	1	0	0	0
20.8324	21.4458	21.7052	19.7292	19.5864	NaN	23.1567	22.4866	21.2566	22.0291	21.2274	20.5252			+	7	7	7	14.4	14.4	14.4	65.408	0	102.42	42891000	17	3834600	4990900	5716100	396020	651860	0	10023000	6187900	3578900	3346600	2537900	1627700	0	2	4	0	0	0	3	2	2	2	1	1
NaN	NaN	NaN	21.8625	23.7106	22.1294	23.5163	24.4696	24.4453	22.3859	23.7475	24.234				1	1	1	5.7	5.7	5.7	14.139	0	6.6598	139910000	5	0	0	0	2337000	11485000	2705900	11762000	24304000	41448000	7690900	16241000	21933000	0	0	0	0	1	0	1	1	0	0	1	1
NaN	NaN	16.9174	19.1919	19.5634	NaN	20.5616	NaN	20.043	20.1307	NaN	NaN				1	1	1	12.7	12.7	12.7	11.674	0	8.9757	6134900	1	0	0	252030	199830	488770	0	2285400	0	1345500	1563300	0	0	0	0	1	0	0	0	0	0	0	0	0	0
NaN	NaN	NaN	22.0837	21.0849	22.1641	22.7779	22.2031	22.368	25.2788	23.2405	23.1167				6	6	6	12.1	12.1	12.1	60.04	0	102.26	106330000	8	0	0	0	2770600	1366900	2663600	11756000	7273600	7354100	42768000	11003000	19376000	0	0	0	0	0	0	0	0	1	4	2	1
NaN	NaN	NaN	NaN	NaN	NaN	15.3907	15.4836	NaN	NaN	NaN	NaN				1	1	1	2.2	2.2	2.2	79.696	0	6.3804	100410	1	0	0	0	0	0	0	46964	53449	0	0	0	0	0	0	0	0	0	0	1	0	0	0	0	0
20.7633	NaN	NaN	23.7164	23.5322	24.0895	25.2146	24.7306	25.2759	26.8869	26.4211	25.9466				14	14	14	23.8	23.8	23.8	76.773	0	281.89	519140000	40	749230	0	0	9043800	12066000	12299000	34998000	46317000	39262000	98661000	188030000	77715000	0	0	0	1	1	2	4	4	5	9	9	5
NaN	22.2402	NaN	24.232	22.7554	25.2387	24.4259	24.4625	24.4359	24.0115	22.809	24.1062				2	2	2	28.6	28.6	28.6	8.647	0	12.25	172490000	3	0	1474300	0	13280000	11275000	32213000	22625000	23655000	32630000	3721600	11041000	20577000	0	0	0	0	1	0	0	0	1	0	1	0
NaN	NaN	NaN	NaN	NaN	NaN	NaN	19.8891	NaN	NaN	NaN	20.2899				2	2	2	4.1	4.1	4.1	66.86	0	12.276	2721800	2	0	0	0	0	0	0	0	1132800	0	0	0	1589000	0	0	0	0	0	0	0	1	0	1	0	0
22.8005	21.8037	21.4143	23.5504	23.3951	22.9398	23.0854	23.212	22.4053	22.3572	NaN	22.4435				4	4	4	17.6	17.6	17.6	43.974	0	82.163	72940000	12	5292100	4572400	6221600	26117000	8728500	288880	134530	156720	10395000	6315400	0	4716800	0	1	1	1	3	2	1	1	0	2	0	0
27.607	27.6871	27.9235	21.1894	21.835	21.6079	19.5012	19.7331	18.2278	19.3897	19.3606	19.2798				18	18	9	51.7	51.7	30	45.205	0	294.47	866770000	35	189990000	224800000	399810000	7416500	9962600	6065200	4745700	4289600	514260	4716900	8297500	6165800	12	10	10	1	2	0	0	0	0	0	0	0
20.7529	NaN	NaN	21.7306	21.7716	21.6231	22.9639	22.4947	20.2186	21.695	22.0464	NaN				6	6	6	8.9	8.9	8.9	90.568	0	133.29	37933000	10	1172300	166970	169680	1869700	2815400	1391900	11245000	10927000	1400100	1889400	4528200	357760	1	0	0	1	0	0	2	2	1	2	1	0
NaN	NaN	21.7176	23.7044	23.7037	23.2412	20.3028	NaN	21.6833	23.693	22.2351	21.8126				4	4	4	7	7	7	67.791	0	32.227	67098000	17	0	0	4726100	9203400	14765000	5156000	102740	0	3908100	16765000	6412200	6059100	0	0	0	2	2	1	1	1	2	4	3	1
23.0127	26.262	24.1907	19.6349	19.2677	NaN	16.0685	20.3736	16.3637	NaN	16.5811	NaN				15	15	15	45.5	45.5	45.5	52.602	0	253.39	141690000	32	28461000	62789000	45982000	935840	882410	0	20021	2401100	36419	0	184060	0	5	14	11	0	1	0	0	1	0	0	0	0
26.4651	26.4721	24.9434	22.3001	NaN	NaN	23.1832	NaN	NaN	NaN	22.9474	NaN				6	6	6	18.9	18.9	18.9	47.65	0	47.309	299750000	8	77864000	112600000	101110000	2531600	0	0	4215300	0	0	0	1429500	0	3	3	2	0	0	0	0	0	0	0	0	0
26.8999	25.7188	25.2442	24.0016	23.132	22.6499	24.3817	24.4672	23.208	23.4929	23.3329	23.5732				21	21	21	20.6	20.6	20.6	163.29	0	243.18	395860000	31	116970000	62914000	75177000	11838000	5805300	3797300	21079000	7309500	11710000	42744000	9266000	27246000	10	6	6	1	0	0	2	2	1	2	0	1
26.3404	25.1729	25.5942	26.057	26.277	25.9124	26.2736	26.1507	26.111	25.7645	26.2731	25.7586				37	37	37	26.5	26.5	26.5	187.15	0	323.31	888010000	132	109200000	28646000	38823000	59571000	59982000	19075000	143010000	63384000	58312000	158550000	82998000	66457000	16	8	6	5	13	9	14	13	6	16	15	11
22.17	22.6807	21.6458	25.4376	26.1031	24.5664	24.8769	25.7739	24.7788	26.8592	26.1304	25.8602				21	21	3	30.7	30.7	5	71.957	0	323.31	604620000	70	21776000	23452000	18837000	28779000	54816000	14638000	23710000	70524000	56878000	120070000	79302000	91840000	0	1	1	9	8	3	6	9	4	6	11	12
NaN	21.8899	21.7527	21.3665	NaN	NaN	NaN	NaN	NaN	21.6018	NaN	21.1181				19	1	1	41.9	3	3	47.883	0	11.02	19306000	1	0	6169900	5355400	1701100	0	0	0	0	0	4145700	0	1933500	0	0	0	1	0	0	0	0	0	0	0	0
22.4801	21.6379	22.2831	NaN	NaN	NaN	NaN	NaN	22.1614	22.2046	20.6802	22.0227				2	2	2	24.8	24.8	24.8	12.283	0	23.974	38796000	5	5314100	6109000	16629000	0	0	0	0	0	2825800	4035800	1694000	2188100	0	1	1	0	0	0	0	0	0	1	1	1
NaN	20.0764	18.1774	16.7742	17.9335	NaN	17.0597	NaN	17.5145	NaN	17.5894	NaN				2	2	2	17	17	17	12.042	0	12.236	3002200	3	0	1646700	793600	24592	179300	0	62566	0	142020	0	153400	0	0	3	0	0	0	0	0	0	0	0	0	0
29.1848	29.0697	28.688	27.8543	27.7136	27.6047	28.1153	27.5606	28.1513	29.1526	28.3511	28.304				8	8	8	82.2	82.2	82.2	11.765	0	323.31	5042900000	159	728670000	271610000	336040000	124620000	159470000	172160000	379460000	341410000	821520000	771070000	368360000	568540000	17	12	11	12	13	14	14	9	17	15	15	10
25.8961	24.2696	25.3204	25.2161	24.6553	24.1636	25.1683	25.3011	25.2572	26.8811	26.0107	25.6361				11	11	11	30.2	30.2	30.2	49.439	0	157.51	681980000	28	50563000	34882000	41099000	22062000	23121000	8389700	56131000	41529000	80237000	178400000	88969000	56588000	1	1	0	1	0	1	3	3	1	9	5	3
31.8974	32.1038	31.794	32.8058	32.6093	33.3247	30.9475	30.6427	31.1756	29.8172	29.47	30.0132				30	30	29	76.8	76.8	76.8	30.777	0	323.31	43661000000	460	2717100000	4228300000	4343400000	4653600000	6705800000	6608900000	2425600000	3242000000	4373200000	1728800000	1268400000	1366000000	31	44	42	63	65	75	31	28	32	15	17	17
25.7626	25.8388	26.0406	28.3755	28.5609	28.8788	28.7785	29.5645	29.3572	28.7	28.9157	29.0771				21	21	21	65	65	65	36.154	0	323.31	5438700000	110	30418000	45888000	58011000	208120000	249320000	300150000	637720000	1020800000	749750000	581750000	885120000	671670000	4	5	3	6	8	8	7	8	15	17	11	18
26.1229	26.4243	25.3596	28.247	26.9041	28.5877	25.0429	25.1632	25.4258	24.4251	23.409	24.2098				7	7	7	51.9	51.9	51.9	14.914	0	194.02	1041500000	58	78423000	53848000	81549000	141060000	66937000	289260000	46683000	84395000	87084000	50242000	7414500	54614000	5	5	2	11	5	13	7	4	2	2	1	1
28.374	28.535	28.8319	32.392	32.2305	32.9563	30.6089	30.5859	30.4538	29.3616	29.1558	28.8169				36	36	36	66.5	66.5	66.5	69.756	0	323.31	23218000000	324	232640000	198310000	403660000	3999700000	3747800000	4449800000	2883200000	2619600000	1883500000	1305900000	1067000000	426470000	11	12	13	43	47	69	32	27	23	16	16	15
27.8011	27.6263	28.1235	31.8704	31.5723	31.5918	29.2608	29.2	29.2363	28.3198	27.7186	27.6226				33	33	29	70.1	70.1	63.3	55.928	0	323.31	11584000000	312	112180000	146670000	204930000	2328500000	3047000000	2281700000	1028600000	843850000	662030000	448460000	349460000	130240000	10	9	18	49	59	64	21	19	17	20	15	11
28.3453	27.8403	27.444	32.0964	31.5405	31.9313	29.8595	29.6824	29.2393	29.0977	28.2703	27.8546				32	32	18	67.3	67.3	49.9	49.496	0	323.31	13200000000	228	222810000	162550000	188410000	2781300000	2669300000	3042000000	1142000000	689130000	987090000	762940000	216210000	336170000	7	6	4	48	40	48	15	13	15	7	14	11
NaN	NaN	NaN	25.854	25.8994	26.0432	26.6599	26.9072	27.3297	28.1373	27.6602	27.842				6	6	6	29	29	29	26.016	0	48.495	1687500000	19	0	0	0	9009900	23294000	14343000	80115000	92391000	201460000	597610000	185370000	483940000	0	0	0	0	0	1	3	2	2	6	1	4
22.8368	21.6682	21.8984	25.3485	25.1424	24.5456	26.7327	27.0237	27.4805	30.6968	27.7623	29.1186				6	6	6	26.1	26.1	26.1	25.773	0	222.65	3812600000	34	2676900	718710	1038100	75904000	49665000	37498000	343770000	205610000	448010000	1230500000	439620000	977610000	0	0	0	3	3	1	4	3	5	6	4	5
22.0378	22.0813	19.9798	19.3174	NaN	18.3626	18.8527	NaN	NaN	NaN	19.265	18.8895				3	3	3	13	13	13	38.298	0	63.15	15538000	6	3079200	7985500	3618300	118720	0	74356	135940	0	0	0	301950	224370	1	1	1	0	0	1	0	0	0	0	1	1
23.4292	22.9014	22.7121	NaN	NaN	NaN	NaN	NaN	NaN	NaN	NaN	NaN				3	3	3	12.4	12.4	12.4	38.177	0	18.94	32327000	3	10095000	8494200	13737000	0	0	0	0	0	0	0	0	0	2	0	1	0	0	0	0	0	0	0	0	0
22.8719	21.8421	22.4633	24.9284	24.7795	24.9131	23.9204	24.2683	22.3527	23.278	24.5315	22.3899				12	12	12	6.5	6.5	6.5	239.62	0	148.73	166700000	22	3307400	4406000	11039000	37141000	26835000	23835000	16713000	10306000	7445700	13995000	3606200	8066700	3	1	2	4	3	2	1	1	1	2	1	1
18.9549	19.0016	19.0276	18.064	17.7639	18.0509	18.212	18.3391	15.5183	17.4307	17.809	16.7833				2	2	2	6.5	6.5	6.5	38.999	0	12.545	4029800	3	616100	754560	946430	155730	166600	142460	311110	378890	65680	171660	240690	79860	0	1	0	0	0	0	0	0	1	1	0	0
24.1349	25.1803	24.702	NaN	NaN	NaN	NaN	NaN	NaN	NaN	NaN	NaN				4	2	2	29.4	20.9	20.9	23.511	0	43.818	112010000	7	7471300	83659000	20883000	0	0	0	0	0	0	0	0	0	1	2	4	0	0	0	0	0	0	0	0	0
23.458	26.0718	25.9079	22.881	NaN	22.7277	23.6636	20.7714	20.7028	22.6522	21.4173	21.4381				4	4	3	11.7	11.7	8.4	39.34	0	93.893	247660000	7	15583000	103620000	93913000	1944000	0	2053200	6466300	1147600	3963100	11942000	1687500	5340700	2	2	1	0	0	0	0	0	0	1	0	1
28.9576	29.1527	29.1823	23.266	18.9697	18.0088	21.0175	19.1333	18.7294	19.5429	NaN	18.6604				35	35	35	57.3	57.3	57.3	77.063	0	323.31	2231200000	103	501790000	759720000	936580000	6501800	2865900	918070	7396400	3075000	1299500	8036700	0	3005400	31	35	36	1	0	0	0	0	0	0	0	0
23.856	24.546	24.0893	NaN	NaN	NaN	NaN	NaN	NaN	NaN	NaN	NaN				4	4	4	11.7	11.7	11.7	51.676	0	39.578	73493000	5	16476000	29285000	27732000	0	0	0	0	0	0	0	0	0	1	3	1	0	0	0	0	0	0	0	0	0
NaN	NaN	NaN	23.5072	24.6313	24.1492	24.3894	24.014	24.9562	24.5524	24.9126	25.4857				12	12	12	18.9	18.9	18.9	70.108	0	86.086	260210000	20	0	0	0	10483000	10801000	16645000	20378000	17345000	13455000	83512000	26681000	60910000	0	0	0	0	0	0	1	3	4	4	1	7
22.3376	22.3312	21.2308	NaN	21.1029	22.0392	22.5736	22.2039	22.3526	22.5207	20.6893	21.6078				2	2	2	4.6	4.6	4.6	54.305	0	18.809	54925000	5	4569400	5872700	4025300	0	2247700	1663900	10814000	5639900	7287500	7447600	1972700	3384500	0	0	1	0	1	0	0	0	0	1	2	0
26.7964	24.1982	24.3198	30.7317	30.7925	30.5053	32.4948	33.1814	31.897	31.9076	32.9548	32.0871				252	252	248	64	64	63.4	515.6	0	323.31	51351000000	1774	239480000	147540000	225750000	581360000	800620000	380690000	5515400000	7685300000	7958600000	9255100000	8294200000	10268000000	4	0	0	62	77	35	234	306	260	239	284	273
22.1474	24.2641	23.3875	28.7234	28.4642	28.1893	28.7052	28.4229	28.7323	29.5377	29.1741	29.7748				17	17	17	36.6	36.6	36.6	59.578	0	323.31	5347400000	208	10696000	40982000	38551000	282110000	317330000	171510000	541450000	407070000	682470000	940240000	837800000	1077100000	1	2	1	21	15	14	17	22	20	27	35	33
22.8532	23.3117	23.3009	NaN	NaN	22.8303	NaN	NaN	NaN	NaN	NaN	NaN				5	5	5	13.3	13.3	13.3	54.253	0	58.263	45372000	8	7259200	22370000	14747000	0	0	995010	0	0	0	0	0	0	2	3	3	0	0	0	0	0	0	0	0	0
24.9552	21.9088	24.3939	23.6448	25.0738	23.7438	24.5471	24.7273	24.5558	22.3885	24.1194	24.088			+	17	17	11	28.4	28.4	19.1	66.038	0	318.02	269800000	47	26045000	3160000	29324000	4094400	47541000	3885100	17931000	59411000	26656000	9399700	20863000	21494000	4	0	5	2	6	4	4	8	3	1	4	6
NaN	NaN	NaN	22.1887	22.0581	22.5008	21.5811	22.0341	21.7655	20.8748	22.8121	22.4562				3	3	3	8.6	8.6	8.6	45.674	0	21.67	40041000	5	0	0	0	4967200	75346	5397900	3927000	5391000	3636400	729450	7056600	8860500	0	0	0	0	0	1	1	0	0	1	2	0
NaN	18.9757	NaN	NaN	NaN	NaN	NaN	NaN	NaN	20.8672	NaN	NaN				1	1	1	1.8	1.8	1.8	57.07	0	12.789	3299200	3	0	699520	0	0	0	0	0	0	0	2599700	0	0	0	0	0	0	0	0	1	1	0	1	0	0
18.5635	19.639	18.078	17.7881	20.2057	18.8657	18.6345	19.2414	20.7961	18.3263	21.0167	19.5576				3	3	3	29.8	29.8	29.8	13.38	0	23.677	11922000	8	1133700	147040	1748500	26685	149750	60638	92409	163360	2049600	2242800	1752100	2355000	1	1	1	0	1	0	0	0	1	1	1	1
23.9396	23.7756	22.9424	26.1743	26.3874	25.9802	25.7149	25.5473	24.761	25.6558	25.9325	25.0931			+	15	15	15	25.6	25.6	25.6	85.696	0	232.97	560530000	45	7943700	14274000	18071000	72302000	81005000	34387000	46792000	29146000	26266000	95593000	89783000	44965000	2	2	1	5	12	3	3	2	3	4	5	3
27.0079	25.9556	26.2556	25.9602	25.4165	25.7796	24.2964	24.0351	23.6524	23.4422	23.5824	22.1763				10	10	9	24.5	24.5	21.5	45.371	0	114.63	570460000	19	91540000	128890000	149420000	39339000	45794000	36233000	12936000	19704000	18444000	14714000	8202800	5243400	3	3	1	3	4	0	0	0	1	0	2	2
20.9199	21.1423	20.8589	22.4249	21.8281	NaN	24.077	22.2385	22.7237	24.8076	23.0267	23.7381				7	7	7	16.3	16.3	16.3	65.163	0	189.67	118920000	16	1141300	1769000	1105500	2029900	4855900	0	17561000	6022800	3167900	45318000	18714000	17234000	1	2	1	1	0	0	1	1	1	3	2	3
NaN	NaN	NaN	NaN	NaN	NaN	NaN	NaN	NaN	21.2414	NaN	21.2704				2	2	2	17.8	17.8	17.8	22.277	0	21.765	6558100	4	0	0	0	0	0	0	0	0	0	3974600	0	2583600	0	0	0	0	0	0	0	0	1	2	0	1
19.6148	21.7884	20.3685	NaN	NaN	NaN	NaN	NaN	NaN	NaN	NaN	NaN				4	4	4	15.3	15.3	15.3	45.14	0	71.552	7632300	5	750360	5631500	1250400	0	0	0	0	0	0	0	0	0	1	2	2	0	0	0	0	0	0	0	0	0
20.9911	NaN	20.8448	23.7926	22.2268	20.7115	25.4426	24.4008	24.0926	22.8511	24.8689	23.4565				8	8	8	17	17	17	501.31	0	91.086	189340000	28	494160	0	574550	6347500	3172300	167750	35304000	41377000	29641000	23484000	30072000	18702000	0	0	0	2	1	0	6	4	5	1	6	3
NaN	21.6115	NaN	NaN	NaN	NaN	NaN	NaN	NaN	NaN	NaN	NaN				2	2	2	1.8	1.8	1.8	139.09	0	11.671	4347700	2	0	4347700	0	0	0	0	0	0	0	0	0	0	0	1	1	0	0	0	0	0	0	0	0	0
23.4312	24.3578	23.8903	NaN	NaN	NaN	20.9994	18.5422	17.9853	18.8779	NaN	19.8989				6	6	6	20.4	20.4	20.4	54.565	0	67.067	67584000	10	10337000	26474000	23408000	0	0	0	4228200	246690	166930	1805100	0	918360	2	4	4	0	0	0	0	0	0	0	0	0
29.1155	27.9641	27.9463	25.6593	26.0675	25.601	26.8289	27.1478	25.8434	27.0987	26.4297	26.1084				6	6	2	82.1	82.1	27.4	11.265	0	280.57	2308100000	47	42330000	251190000	278760000	34334000	102280000	35875000	323240000	246720000	194420000	354620000	344580000	99726000	6	6	6	1	3	3	5	2	3	5	2	5
23.6631	23.7028	22.9351	21.5617	23.2151	22.7196	21.5691	22.5885	22.1792	22.4069	22.3185	22.075				7	7	7	23.3	23.3	23.3	48.803	0	145.62	105260000	14	13037000	27967000	25619000	2288400	854190	342810	218650	4623200	10922000	8524400	3711200	7148800	4	2	1	2	0	0	0	2	1	1	1	0
NaN	NaN	NaN	NaN	NaN	NaN	NaN	NaN	NaN	NaN	NaN	NaN				1	1	1	1.9	1.9	1.9	104.79	0	28.125	0	1	0	0	0	0	0	0	0	0	0	0	0	0	0	1	0	0	0	0	0	0	0	0	0	0
NaN	16.4141	NaN	NaN	NaN	NaN	19.2395	NaN	NaN	NaN	NaN	NaN				1	1	1	7	7	7	22.963	0	7.5957	795150	1	0	118490	0	0	0	0	676660	0	0	0	0	0	0	0	0	0	0	0	1	0	0	0	0	0
24.0121	23.8754	26.1076	NaN	21.8833	NaN	NaN	NaN	NaN	21.352	NaN	21.8375				7	7	5	39.8	39.8	31.3	23.602	0	179.76	148360000	14	27173000	53252000	63196000	0	1610100	0	0	0	0	1123100	0	2007700	1	5	8	0	0	0	0	0	0	0	0	0
21.1686	NaN	19.4222	NaN	20.6849	NaN	22.4236	21.4394	21.9379	21.0606	19.7295	20.9493				3	3	3	4	4	4	105.21	0	25.288	26631000	6	2930400	0	189910	0	916170	0	4992300	3622500	5532500	5459800	674860	2312200	1	0	0	0	1	0	2	0	2	0	0	0
19.9054	19.866	NaN	NaN	NaN	NaN	NaN	NaN	NaN	NaN	NaN	NaN			+	2	2	2	2.4	2.4	2.4	101.39	0	11.711	7967400	2	982040	1296600	0	0	0	0	0	0	3607600	2081200	0	0	1	0	0	0	0	0	0	0	1	0	0	0
22.0941	21.4562	18.9895	20.3092	NaN	NaN	NaN	NaN	17.7458	NaN	NaN	NaN				3	3	3	9.5	9.5	9.5	60.556	0	35.172	10589000	5	5069000	2584000	2364700	404220	0	0	0	0	167430	0	0	0	2	1	1	1	0	0	0	0	0	0	0	0
22.7414	23.4819	22.6417	NaN	NaN	NaN	NaN	NaN	NaN	NaN	NaN	NaN				5	5	5	23.8	23.8	23.8	34.258	0	140.43	32325000	10	6883700	15047000	10394000	0	0	0	0	0	0	0	0	0	2	5	3	0	0	0	0	0	0	0	0	0
NaN	NaN	NaN	23.2895	23.2738	23.0307	21.7619	22.3736	22.0623	21.124	20.8871	21.1323				6	6	6	21.1	21.1	21.1	39.731	0	167.08	45009000	20	0	0	0	7018600	13675000	3980900	2453400	6090300	4601600	3033800	1939500	2215900	0	1	0	2	4	3	0	3	2	2	1	2
20.3433	21.6259	20.3644	21.6608	22.1184	23.0028	22.0281	22.4426	22.0177	22.825	24.1208	23.5451				5	5	5	11.4	11.4	11.4	66.034	0	91.331	85060000	15	598620	1118500	877880	2373500	4424600	3443900	6763600	14319000	6588200	10846000	21110000	12597000	0	0	0	1	1	2	2	1	1	3	3	1
NaN	20.1331	19.1349	NaN	NaN	NaN	NaN	NaN	NaN	NaN	NaN	NaN				2	2	2	7.2	7.2	7.2	46.312	0	37.889	2386900	2	0	1425200	961750	0	0	0	0	0	0	0	0	0	0	0	2	0	0	0	0	0	0	0	0	0
22.5747	22.2934	22.5051	NaN	NaN	NaN	NaN	NaN	NaN	NaN	NaN	NaN				7	7	7	14.7	14.7	14.7	69.068	0	101.97	21831000	9	5852600	7720300	8258000	0	0	0	0	0	0	0	0	0	3	4	2	0	0	0	0	0	0	0	0	0
NaN	20.4393	NaN	NaN	NaN	NaN	NaN	NaN	NaN	NaN	NaN	NaN			+	2	2	2	7.7	7.7	7.7	38.429	0	48.849	1929300	3	0	1929300	0	0	0	0	0	0	0	0	0	0	1	1	1	0	0	0	0	0	0	0	0	0
NaN	NaN	NaN	23.1769	21.6609	23.3998	22.7573	23.0084	23.9103	23.7331	22.2434	24.0394				3	3	3	18.1	18.1	18.1	14.553	0	23.665	105250000	3	0	0	0	4177400	3385700	4883900	4625100	6407500	19335000	22423000	8785100	31230000	0	0	0	0	1	0	0	0	0	0	2	0
23.6828	24.0599	23.4352	NaN	NaN	NaN	NaN	NaN	NaN	NaN	NaN	NaN				6	6	4	53.1	53.1	40.1	15.998	0	141.84	52876000	10	15288000	17731000	19858000	0	0	0	0	0	0	0	0	0	3	4	3	0	0	0	0	0	0	0	0	0
NaN	NaN	NaN	NaN	NaN	NaN	24.1798	24.3322	24.4878	20.7101	NaN	NaN				7	7	7	14.4	14.4	14.4	59.864	0	88.505	80133000	12	0	0	0	0	0	0	15427000	23036000	39875000	1794200	0	0	0	0	0	0	0	0	2	5	5	0	0	0
23.2832	23.9649	22.4794	23.7543	23.243	23.2017	22.6336	22.8742	21.8858	20.4958	22.1261	21.4144				7	7	7	9.2	9.2	9.2	103.36	0	48.339	101800000	20	20783000	6962600	29488000	7312900	4364000	5273800	400050	4818300	6081100	11784000	331030	4197700	2	4	1	3	2	1	1	3	1	0	1	1
NaN	NaN	NaN	NaN	NaN	NaN	NaN	NaN	NaN	NaN	NaN	18.9132				1	1	1	22.5	22.5	22.5	13.988	0	29.361	611930	1	0	0	0	0	0	0	0	0	0	0	0	611930	0	0	0	0	0	0	0	0	0	0	0	1
22.2343	22.2464	21.3334	NaN	21.4935	NaN	22.3856	20.3626	19.5867	22.2735	22.4408	20.516				1	1	1	0.2	0.2	0.2	771.15	0	9.2995	53104000	3	4997900	6857600	3095800	0	2351100	0	6283700	1033800	1149500	7043100	16184000	4108400	0	0	0	0	0	0	0	0	1	0	1	1
NaN	NaN	NaN	NaN	NaN	NaN	NaN	NaN	17.7473	NaN	NaN	NaN				1	1	1	2.9	2.9	2.9	35.026	0	7.0805	290600	1	0	0	0	0	0	0	0	0	290600	0	0	0	0	0	0	0	0	0	0	0	1	0	0	0
NaN	NaN	NaN	NaN	NaN	NaN	NaN	NaN	NaN	19.9268	NaN	19.9116				1	1	1	1.1	1.1	1.1	102.51	0	7.5215	2577200	1	0	0	0	0	0	0	0	0	0	1354700	0	1222500	0	0	0	0	0	0	0	0	0	0	0	1
19.5038	18.9663	19.6681	NaN	NaN	NaN	NaN	NaN	NaN	NaN	NaN	NaN				2	2	2	5.2	5.2	5.2	62.216	0	11.244	2646600	2	689040	725040	1232500	0	0	0	0	0	0	0	0	0	0	1	1	0	0	0	0	0	0	0	0	0
NaN	NaN	NaN	NaN	NaN	NaN	21.7506	22.1176	23.1428	23.0784	22.7357	23.6889				1	1	1	3.3	3.3	3.3	52.263	0	13.352	86196000	9	0	0	0	0	0	0	3857300	5308500	22648000	12038000	17629000	24716000	0	0	0	0	0	1	1	1	2	1	1	2
NaN	NaN	NaN	NaN	NaN	NaN	NaN	NaN	NaN	NaN	NaN	25.2538				1	1	1	1.4	1.4	1.4	99.914	0	6.1954	246150000	0	0	0	0	3883100	3236100	2931100	38629000	48980000	50808000	3273300	44820000	49594000	0	0	0	0	0	0	0	0	0	0	0	0
NaN	NaN	NaN	NaN	NaN	NaN	20.0643	21.2845	21.791	21.5729	20.4559	21.6631				2	2	2	5.1	5.1	5.1	48.506	0	12.541	19221000	3	0	0	0	0	0	0	1317700	2497700	5706700	4340400	873000	4486000	0	0	0	0	0	0	1	0	0	1	0	1
[truncated: 6 more columns]

## Sheet: table4
Table 4. Proteins identified after valid value filter (1vv in total)
Plasma1	Plasma2	Plasma3	NUAP1	NUAP2	NUAP3	ZFP1	ZFP2	ZFP3	ZWP1	ZWP2	ZWP3	Only identified by site	Reverse	Potential contaminant	Peptides	Razor + unique peptides	Unique peptides	Sequence coverage [%]	Unique + razor sequence coverage [%]	Unique sequence coverage [%]	Mol. weight [kDa]	Q-value	Score	Intensity	MS/MS count	Intensity Plasma1	Intensity Plasma2	Intensity Plasma3	Intensity NUAP1	Intensity NUAP2	Intensity NUAP3	Intensity ZFP1	Intensity ZFP2	Intensity ZFP3	Intensity ZWP1	Intensity ZWP2	Intensity ZWP3	MS/MS count Plasma1	MS/MS count Plasma2	MS/MS count Plasma3	MS/MS count NUAP1	MS/MS count NUAP2	MS/MS count NUAP3	MS/MS count ZFP1	MS/MS count ZFP2	MS/MS count ZFP3	MS/MS count ZWP1	MS/MS count ZWP2	MS/MS count ZWP3
#!{Type}E	E	E	E	E	E	E	E	E	E	E	E	C	C	C	N	N	N	N	N	N	N	N	N	N	N	N	N	N	N	N	N	N	N	N	N	N	N	N	N	N	N	N	N	N	N	N	N	N	N
#!{C:Group1}Plasma	Plasma	Plasma	NUAP	NUAP	NUAP	ZFP	ZFP	ZFP	ZWP	ZWP	ZWP
28.7592	29.7571	28.0962	22.2685	22.5361	19.8364	21.1591	19.5376	18.884	19.4457	20.5136	18.9477				25	25	25	61.7	61.7	61.7	46.708	0	323.31	2121200000	84	473680000	863930000	717700000	8373300	10076000	3632900	4405300	13647000	5756900	4313800	10399000	5290000	22	26	30	2	2	0	0	1	0	1	0	0
25.0588	22.7213	24.7222	21.8603	21.1808	20.6602	22.4348	21.8407	22.7051	22.8442	22.4632	23.0591				1	1	1	7.8	7.8	7.8	12.586	0	6.2754	139680000	2	23136000	14040000	26096000	2698200	1945500	718470	8398200	4831900	13440000	15980000	10175000	18223000	1	0	1	0	0	0	0	0	0	0	0	0
NaN	NaN	NaN	19.3654	NaN	19.7364	21.6552	NaN	NaN	NaN	NaN	NaN				1	1	1	8.7	8.7	8.7	12.441	0	6.2085	4558800	2	0	0	0	431140	0	517020	3610600	0	0	0	0	0	0	0	0	0	0	1	1	0	0	0	0	0
23.7512	22.7612	23.9068	21.842	NaN	21.567	20.5731	20.8995	21.505	21.3585	20.1371	21.8241				1	1	1	13.9	13.9	13.9	12.332	0	90.908	68824000	3	10964000	15743000	17395000	1863200	0	2277600	1678800	2422200	4799200	4313100	1319800	6048900	1	0	1	1	0	0	0	0	0	0	0	0
NaN	NaN	NaN	NaN	NaN	NaN	NaN	NaN	18.9791	19.2962	20.0111	NaN				1	1	1	9.3	9.3	9.3	12.891	0	6.3172	2922200	1	0	0	0	0	0	0	0	0	630440	1006900	1284900	0	0	0	0	0	0	0	0	0	0	0	1	0
NaN	NaN	NaN	NaN	14.8504	NaN	15.0469	15.2541	14.9866	15.0109	17.8798	14.9648				1	1	1	11.1	11.1	11.1	13.012	0	6.5797	542560	1	0	0	0	0	31323	0	48196	68552	53569	57009	235140	48775	0	0	0	0	0	0	0	0	0	0	1	0
NaN	NaN	NaN	NaN	NaN	NaN	NaN	NaN	NaN	19.1971	NaN	NaN				1	1	1	7.8	7.8	7.8	12.534	0	7.0244	816890	1	0	0	0	0	0	0	0	0	0	816890	0	0	0	0	0	0	0	0	0	0	0	1	0	0
26.6782	25.4458	26.4093	17.284	NaN	17.2817	NaN	NaN	NaN	NaN	NaN	NaN				9	9	9	88.7	88.7	88.7	12.633	0	199.9	311470000	52	78972000	133640000	98629000	123930	0	99485	0	0	0	0	0	0	14	17	20	1	0	0	0	0	0	0	0	0
19.4148	NaN	NaN	NaN	NaN	NaN	NaN	NaN	19.902	19.8157	19.4312	NaN				1	1	1	5.1	5.1	5.1	18.118	0	6.8748	4204800	1	551470	0	0	0	0	0	0	0	1431300	1306600	915500	0	0	0	0	0	0	0	0	0	0	0	1	0
21.594	NaN	NaN	NaN	NaN	NaN	22.4722	22.5726	23.0719	24.3822	22.913	23.0562				7	7	7	12.8	12.8	12.8	75.905	0	119.34	79427000	19	975830	0	0	0	0	0	6791700	8084100	14644000	26940000	8349600	13642000	0	0	0	0	0	0	3	3	2	5	3	3
21.8722	22.7982	23.1843	26.3072	27.3317	27.8547	25.6427	27.6326	26.4253	24.6779	26.2483	24.969				3	3	3	20.2	20.2	20.2	23.353	0	22.462	970690000	17	2050300	5285800	7251400	52548000	164790000	150820000	58315000	227180000	123280000	35936000	100150000	43084000	1	1	1	3	3	2	0	0	2	1	1	2
NaN	NaN	NaN	21.7244	20.5913	NaN	NaN	20.6191	21.0671	23.0737	22.7107	22.5188				4	4	4	1.9	1.9	1.9	252.23	0	45.333	37830000	8	0	0	0	1308800	631840	0	0	2723400	576510	13497000	9513100	9578400	0	0	0	0	1	1	0	1	0	1	3	1
28.6628	27.2682	27.098	28.0952	28.5105	27.1229	28.372	28.2845	28.7582	29.6019	28.7968	28.827				13	13	6	45.6	45.6	26.1	43.911	0	323.31	5029200000	207	199340000	103100000	99828000	136850000	424240000	210220000	511780000	581980000	767060000	531960000	720050000	742780000	9	5	4	14	17	9	25	21	19	32	24	28
NaN	NaN	NaN	NaN	NaN	NaN	NaN	NaN	16.8101	17.6806	NaN	NaN				1	1	1	9.4	9.4	9.4	13.508	0	7.5957	437300	1	0	0	0	0	0	0	0	0	151770	285520	0	0	0	0	0	0	0	0	0	0	0	1	0	0
NaN	NaN	17.796	NaN	NaN	NaN	20.6948	NaN	18.5853	NaN	19.5179	18.4904				2	1	1	16.8	10.9	10.9	12.926	0	7.7281	4205800	1	0	0	182820	0	0	0	1304000	0	506360	0	1796000	416610	0	0	0	0	0	0	1	0	0	0	0	0
21.1809	NaN	NaN	NaN	NaN	NaN	NaN	NaN	NaN	19.2738	20.0737	NaN				3	2	2	28.2	18.8	18.8	12.839	0	11.025	4593500	2	2691600	0	0	0	0	0	0	0	0	1336200	565680	0	1	0	0	0	0	0	0	0	0	1	0	0
24.1218	24.0996	24.2423	22.3717	23.0544	23.0083	23.4038	24.519	23.263	23.2219	22.9218	23.6206				6	2	2	39.5	12.6	12.6	23.15	0	37.884	185370000	21	17175000	24947000	34820000	3331100	7814800	5040000	18131000	28481000	12824000	15769000	1626200	15408000	3	5	4	1	1	2	1	1	1	1	1	0
20.7439	NaN	20.2625	NaN	NaN	NaN	21.4271	22.4237	NaN	NaN	NaN	21.8456				2	1	1	30.6	11.2	11.2	10.657	0	14.107	17849000	4	1655800	0	1759000	0	0	0	3403400	6444200	0	0	0	4586600	0	1	1	0	0	0	0	1	0	0	0	1
NaN	NaN	NaN	NaN	NaN	NaN	NaN	19.9043	20.5836	20.4097	20.4105	20.5073				2	2	2	21.6	21.6	21.6	12.515	0	11.958	12649000	2	1083000	1561000	1264200	0	0	0	0	1233600	2195900	1775400	1681900	1853900	0	1	0	0	0	0	0	1	0	0	0	0
NaN	NaN	NaN	NaN	NaN	NaN	23.5724	21.3889	NaN	22.8763	21.9066	21.5213				2	2	2	23.9	23.9	23.9	12.82	0	70.159	36787000	4	0	0	0	0	0	0	11636000	2551700	0	15175000	4313800	3111300	0	0	0	0	0	0	1	0	1	1	1	0
NaN	NaN	NaN	NaN	17.5346	NaN	19.4946	19.4217	17.9393	19.4336	19.8114	NaN				1	1	1	9.4	9.4	9.4	12.772	0	11.001	4281600	6	0	0	0	0	177120	0	807550	819310	331980	962430	1183200	0	0	0	0	0	0	0	1	1	1	1	1	1
NaN	NaN	NaN	25.0556	24.8707	25.3748	24.8696	24.2962	24.8054	24.7795	24.2492	24.3924				1	1	1	7.8	7.8	7.8	12.943	0	7.0232	260920000	2	0	0	0	22821000	27523000	29493000	32214000	18939000	36409000	36469000	27632000	29416000	0	0	0	0	0	0	0	0	0	0	1	1
NaN	NaN	NaN	NaN	NaN	NaN	21.4538	21.2106	20.4679	22.2212	21.8951	20.8053				1	1	1	13	13	13	12.537	0	12.989	21802000	4	0	0	0	0	0	0	3104100	3019400	1893500	6568800	4957800	2258300	0	0	0	0	0	0	1	0	1	1	1	0
25.234	24.4746	24.8386	24.1269	23.0439	23.7639	24.7272	24.3675	24.4358	26.4592	23.132	25.7695				21	21	21	18.5	18.5	18.5	187.67	0	259.7	446180000	47	43597000	32356000	36365000	6496600	7179600	4893000	21363000	19014000	28545000	139200000	12906000	94263000	2	1	5	3	4	2	5	3	2	8	3	9
21.2882	21.1975	21.1253	22.4211	23.1614	21.8849	22.3934	22.9391	24.4041	24.3215	23.7674	23.4992				4	4	3	32.5	32.5	23.1	12.965	0	82.169	127440000	16	3065600	3181900	4075700	4258800	8136200	4076100	16255000	10427000	15745000	30631000	14916000	12667000	0	1	0	1	1	0	1	1	2	4	2	3
NaN	NaN	NaN	NaN	NaN	NaN	21.9163	21.8014	22.117	22.1819	21.0182	22.2066				1	1	1	12.6	12.6	12.6	11.603	0	6.8344	29945000	1	0	0	0	0	0	0	4377700	3983600	6985600	7865200	1482600	5250500	0	0	0	0	0	0	0	0	0	0	0	1
22.1429	21.0091	21.8908	24.2286	23.6455	24.1283	23.5678	22.5445	23.7543	24.1425	23.088	24.9924				3	3	3	14.5	14.5	14.5	35.116	0	56.634	168600000	7	2869100	2630600	3284700	11162000	9839300	10948000	12346000	7347900	20154000	27744000	9227700	51045000	0	1	0	3	1	0	0	1	1	0	0	0
25.1602	21.6392	22.3509	22.3872	24.4411	22.9084	23.3772	24.8177	23.7085	21.8815	24.0505	23.6621			+	11	11	9	16.7	16.7	14	59.51	0	278.33	191930000	29	31094000	2497500	2911700	1808700	17623000	3233500	16817000	41076000	21588000	5612900	25934000	21736000	5	1	1	1	4	1	0	6	2	2	3	3
22.5055	22.1867	23.5838	25.198	26.2142	25.7859	25.5106	25.4635	25.1364	26.0383	26.0149	25.283				13	7	5	47.2	32.6	25.2	41.215	0	213.56	560210000	51	29196000	18547000	15631000	37038000	61207000	19262000	44869000	48855000	35197000	92464000	106030000	51906000	1	1	2	3	5	5	6	7	3	6	7	5
27.1069	27.4934	27.0576	24.0495	23.1586	24.3734	23.8538	24.1671	23.5472	25.8743	23.8884	24.9403				10	10	10	31.4	31.4	31.4	42.848	0	156.9	843970000	24	123370000	243550000	172120000	6619300	4716800	4509000	43473000	22616000	26614000	93607000	25255000	77526000	2	7	7	0	0	0	1	2	1	2	1	1
23.9385	23.2413	23.0173	19.9797	20.4582	19.7323	20.2365	20.7085	21.5257	23.0519	22.1175	22.5417				10	4	3	35.4	18.2	14.7	43.805	0	50.347	75077000	25	20889000	10583000	9545200	237680	4031100	212550	5300100	1679200	1647200	5406300	7360500	8184400	7	1	1	1	0	1	2	2	1	4	3	2
19.643	18.0028	NaN	20.0105	20.8446	17.3846	NaN	NaN	NaN	19.1889	NaN	19.3811				2	2	2	9.8	9.8	9.8	23.845	0	13.351	6047900	2	1827900	255280	0	87306	1056600	5536.4	0	0	0	1323800	0	1491600	0	0	0	1	0	0	0	0	0	0	0	1
NaN	NaN	NaN	16.6966	NaN	NaN	NaN	NaN	NaN	14.2877	NaN	NaN				3	1	1	29.9	11.2	11.2	13.842	0	6.4495	94979	1	0	0	0	67796	0	0	0	0	0	27183	0	0	0	0	0	1	0	0	0	0	0	0	0	0
18.4047	18.3337	19.294	19.3542	21.1288	NaN	24.0819	24.1556	23.6347	26.4956	24.8399	24.3191				6	6	6	11.3	11.3	11.3	80.173	0	97.299	251690000	16	270240	349070	417460	568480	2021300	0	23211000	23212000	20145000	89500000	33998000	57992000	1	1	0	0	0	0	2	0	2	5	1	4
NaN	20.4019	20.6502	19.1971	20.3091	NaN	19.8955	NaN	19.9275	20.956	18.8594	19.4426				3	3	1	36.6	36.6	10.9	11.167	0	19.037	12770000	3	0	1595100	2362600	428570	51682	0	1868900	0	804440	4271800	540660	846540	0	0	0	0	0	0	0	0	0	1	0	2
25.9349	26.0056	25.5762	23.8221	23.3844	23.4005	22.2301	21.3026	21.8212	24.941	22.5474	24.8099				14	14	14	31.3	31.3	31.3	53.213	0	323.31	366650000	51	61852000	99528000	92076000	5589900	5567800	3696400	4630800	1744500	3591300	41728000	7883300	38758000	8	8	8	2	2	2	4	1	1	8	2	5
19.8687	20.1423	NaN	NaN	19.75	NaN	21.2046	21.3321	21.4811	NaN	21.4401	23.6694				1	1	1	0.9	0.9	0.9	145.62	0	7.9581	33301000	2	831290	1499000	0	0	685400	0	3644700	2400900	5870100	0	5476800	12893000	0	0	0	0	0	0	0	1	0	0	0	1
23.2819	23.7303	23.5299	22.7265	21.5022	21.8294	20.8592	NaN	21.2229	20.4634	NaN	20.8636				6	6	6	30.2	30.2	30.2	30.67	0	59.978	71612000	15	14242000	24965000	25949000	697300	1407500	764600	397580	0	1085700	932250	0	1171400	2	1	2	0	1	2	0	1	3	2	0	1
NaN	NaN	NaN	28.4388	26.4922	27.8944	25.3235	25.7026	25.4854	24.4527	23.8963	23.8755				1	1	1	1.5	1.5	1.5	52.991	0	8.6	691200000	8	0	0	0	274370000	26777000	152530000	46108000	80837000	77055000	5923900	3351500	24251000	0	0	0	2	0	2	2	1	0	0	0	1
23.5063	23.8155	24.2179	23.6662	22.8504	22.624	23.3059	22.7187	23.7158	23.1257	22.8434	23.5445				1	1	1	13.7	13.7	13.7	12.815	0	127.93	152890000	11	11684000	18278000	26172000	8623300	7076800	4660300	11310000	6050400	20341000	12132000	10145000	16420000	0	0	0	2	0	1	2	1	1	1	1	2
22.3868	21.7312	22.5158	NaN	NaN	20.5951	21.1813	20.7262	21.0716	22.0652	21.2967	20.831				1	1	1	17.1	17.1	17.1	8.1675	0	10.268	38749000	10	5680900	4717700	8531300	0	0	936380	2596400	2021000	2690600	5956800	3308600	2309200	0	1	1	1	1	1	1	1	0	1	1	1
21.3152	20.29	20.6895	23.178	22.3471	24.6938	23.623	23.057	22.4896	21.6715	22.1138	22.3498				6	6	6	26.5	26.5	26.5	24.158	0	106.34	96244000	16	2600200	1578500	2418900	7287100	8898300	5025500	8775900	12127000	12264000	8672000	14978000	11618000	0	0	1	2	1	1	1	3	2	1	1	3
NaN	NaN	NaN	22.49	22.0435	22.1708	24.0235	25.2924	NaN	23.72	23.9746	24.2664				1	1	1	2	2	2	76.736	0	7.139	147580000	1	0	0	0	1809100	1423700	1077700	25967000	26346000	0	21195000	28540000	41226000	0	0	0	0	0	0	0	1	0	0	0	0
16.234	NaN	NaN	NaN	24.9406	17.2206	16.8494	21.7522	17.5032	18.4534	19.8127	17.2644			+	6	2	0	9.9	3	0	63.165	0	12.252	40397000	3	42670	0	0	0	14456000	780790	3893800	9569900	716400	1122300	6989500	2825500	0	0	0	0	1	0	0	2	0	0	0	0
28.0902	27.4277	28.0157	27.6599	27.9012	27.1088	28.4313	27.6848	28.2005	28.2329	28.9383	27.904			+	4	4	4	25.1	25.1	25.1	24.409	0	102.7	4012700000	32	34005000	176350000	54274000	54653000	164500000	41248000	411050000	560130000	480590000	751490000	803710000	480700000	2	2	2	1	4	2	3	4	3	2	4	3
21.061	19.6809	NaN	19.5098	NaN	NaN	NaN	NaN	NaN	NaN	NaN	NaN			+	4	4	2	36.6	36.6	19	15.184	0	26.552	4230900	8	2644900	1556800	0	29247	0	0	0	0	0	0	0	0	6	1	1	0	0	0	0	0	0	0	0	0
18.1889	NaN	NaN	18.2628	18.9058	NaN	18.6006	NaN	NaN	NaN	18.5116	17.9381			+	3	1	1	6.1	2.8	2.8	51.621	0	6.5521	2159300	1	235750	0	0	192550	594170	0	456120	0	0	0	474260	206430	0	0	0	1	0	0	0	0	0	0	0	0
NaN	NaN	NaN	23.6016	21.019	21.268	20.6821	20.1561	19.8878	NaN	NaN	NaN			+	5	1	1	9.3	2.6	2.6	56.44	0	8.9873	18034000	3	0	0	0	7083800	1728200	4200900	2339200	1444600	1237500	0	0	0	0	0	0	1	1	1	0	0	0	0	0	0
33.6936	34.3113	33.9139	29.6777	29.3304	28.2135	28.657	28.3128	27.4509	28.6679	28.427	27.8111			+	57	57	52	79	79	73.9	69.366	0	323.31	68138000000	867	20293000000	23169000000	21484000000	506650000	355030000	94046000	472540000	343740000	251710000	455790000	383540000	329620000	198	197	208	61	45	28	30	25	8	26	22	19
22.9367	22.3224	21.5961	NaN	NaN	22.3241	21.8019	NaN	23.0374	20.5473	20.8364	22.51			+	12	7	7	20.4	14.2	14.2	69.293	0	45.632	51797000	15	11232000	8348600	7741800	0	0	1715800	890690	393990	8527100	730040	1553900	10663000	5	1	1	1	0	0	0	0	3	1	1	2
20.7648	19.7824	19.8134	20.3865	19.2596	19.8645	19.5661	19.0496	18.5977	19.9641	19.1712	19.9479			+	4	3	3	18.7	15.3	15.3	38.418	0	38.565	13573000	49	520820	363910	395610	663580	1014800	1433600	1223200	1109400	2756400	398590	365170	3327700	3	6	5	7	4	4	2	0	2	7	4	5
17.9004	NaN	NaN	16.4905	NaN	NaN	15.584	NaN	NaN	15.7095	NaN	NaN			+	2	1	1	10.9	4.9	4.9	30.276	0	12.334	493780	5	201030	0	0	93750	0	0	79247	0	0	119750	0	0	4	0	0	0	0	0	0	0	0	1	0	0
19.5645	16.5764	16.7998	19.8469	NaN	16.4594	15.4946	NaN	NaN	16.481	15.8886	NaN			+	2	2	2	7.7	7.7	7.7	46.103	0	18.003	2432000	14	963810	106270	129060	741840	0	155220	27803	0	0	258760	49265	0	7	1	0	4	0	0	0	0	0	2	0	0
NaN	NaN	20.561	18.3753	20.3385	20.0713	19.0904	21.444	19.4262	NaN	20.5866	19.1673			+	5	5	5	11.9	11.9	11.9	62.129	0	93.126	12007000	15	0	0	1888100	187590	1833400	493800	258490	3306800	2336100	0	1337600	365420	0	0	2	1	1	2	1	2	2	0	2	2
17.3378	NaN	NaN	NaN	19.8855	17.5826	18.1585	18.9638	18.2667	NaN	19.5706	17.5007			+	6	2	2	10.9	5	5	65.865	0	11.095	3514900	2	62719	0	0	0	2000500	52126	28528	374690	300280	0	598640	97441	0	0	0	0	0	0	0	1	0	0	1	0
21.1797	22.0597	21.7362	21.5159	22.1117	21.8605	21.0085	21.6295	20.2462	20.5203	21.3526	19.3329			+	2	1	1	6.1	2.9	2.9	43.017	0	29.25	34643000	2	2271600	4609500	5770700	2056600	5584600	2728800	2078500	2941300	1136700	1555300	3496500	412730	0	1	0	0	0	0	0	1	0	0	0	0
17.3593	NaN	NaN	16.6026	NaN	NaN	14.6971	NaN	NaN	15.6707	NaN	NaN			+	4	2	2	24.9	15.4	15.4	22.06	0	47.333	470810	9	332040	0	0	53928	0	0	24654	0	0	60188	0	0	6	0	0	2	0	0	0	0	0	1	0	0
22.6274	19.35	21.3549	26.5832	26.4805	26.712	26.3693	27.1955	28.0009	29.771	26.8876	29.4672				8	8	8	45	45	45	26.459	0	190.9	3218600000	94	2343700	122350	1029800	70167000	57321000	24745000	154320000	117010000	419470000	1022300000	221500000	1128300000	0	0	0	5	4	1	7	10	10	23	12	22
25.4252	26.6363	26.6413	17.5462	16.9854	19.9802	18.7529	20.1769	NaN	18.5386	17.9261	17.3814				12	12	12	30.9	30.9	30.9	53.02	0	174.79	326500000	32	79780000	101550000	136880000	108030	107030	326750	1425000	1321400	0	2606200	818930	1577000	4	11	10	1	1	2	0	2	0	1	0	0
NaN	NaN	14.2235	15.139	NaN	15.6087	NaN	18.1625	17.1041	NaN	17.326	16.5523				1	1	1	2.4	2.4	2.4	55.389	0	7.0855	918750	4	0	0	30479	30195	0	42059	0	325230	176820	0	200770	113200	0	0	0	0	0	0	0	1	1	0	1	1
NaN	NaN	NaN	NaN	NaN	NaN	NaN	NaN	NaN	23.93	21.8837	21.4085				2	2	2	8	8	8	45.147	0	18.295	39082000	3	261420	0	425050	1261200	0	0	4447700	1026100	1567200	21551000	3847700	4694400	0	0	0	0	0	0	0	0	0	2	1	0
24.2843	22.2566	22.9476	20.6833	19.6449	NaN	21.5122	21.3434	21.3066	NaN	20.9313	20.7199				7	7	7	11.5	11.5	11.5	97.712	0	96.809	56470000	11	18588000	9818600	13168000	943980	327010	0	1837200	4307800	4445700	0	2682100	351740	4	3	3	0	0	0	0	0	1	0	0	0
20.8324	21.4458	21.7052	19.7292	19.5864	NaN	23.1567	22.4866	21.2566	22.0291	21.2274	20.5252			+	7	7	7	14.4	14.4	14.4	65.408	0	102.42	42891000	17	3834600	4990900	5716100	396020	651860	0	10023000	6187900	3578900	3346600	2537900	1627700	0	2	4	0	0	0	3	2	2	2	1	1
NaN	NaN	NaN	21.8625	23.7106	22.1294	23.5163	24.4696	24.4453	22.3859	23.7475	24.234				1	1	1	5.7	5.7	5.7	14.139	0	6.6598	139910000	5	0	0	0	2337000	11485000	2705900	11762000	24304000	41448000	7690900	16241000	21933000	0	0	0	0	1	0	1	1	0	0	1	1
NaN	NaN	16.9174	19.1919	19.5634	NaN	20.5616	NaN	20.043	20.1307	NaN	NaN				1	1	1	12.7	12.7	12.7	11.674	0	8.9757	6134900	1	0	0	252030	199830	488770	0	2285400	0	1345500	1563300	0	0	0	0	1	0	0	0	0	0	0	0	0	0
NaN	NaN	NaN	22.0837	21.0849	22.1641	22.7779	22.2031	22.368	25.2788	23.2405	23.1167				6	6	6	12.1	12.1	12.1	60.04	0	102.26	106330000	8	0	0	0	2770600	1366900	2663600	11756000	7273600	7354100	42768000	11003000	19376000	0	0	0	0	0	0	0	0	1	4	2	1
NaN	NaN	NaN	NaN	NaN	NaN	15.3907	15.4836	NaN	NaN	NaN	NaN				1	1	1	2.2	2.2	2.2	79.696	0	6.3804	100410	1	0	0	0	0	0	0	46964	53449	0	0	0	0	0	0	0	0	0	0	1	0	0	0	0	0
20.7633	NaN	NaN	23.7164	23.5322	24.0895	25.2146	24.7306	25.2759	26.8869	26.4211	25.9466				14	14	14	23.8	23.8	23.8	76.773	0	281.89	519140000	40	749230	0	0	9043800	12066000	12299000	34998000	46317000	39262000	98661000	188030000	77715000	0	0	0	1	1	2	4	4	5	9	9	5
NaN	22.2402	NaN	24.232	22.7554	25.2387	24.4259	24.4625	24.4359	24.0115	22.809	24.1062				2	2	2	28.6	28.6	28.6	8.647	0	12.25	172490000	3	0	1474300	0	13280000	11275000	32213000	22625000	23655000	32630000	3721600	11041000	20577000	0	0	0	0	1	0	0	0	1	0	1	0
NaN	NaN	NaN	NaN	NaN	NaN	NaN	19.8891	NaN	NaN	NaN	20.2899				2	2	2	4.1	4.1	4.1	66.86	0	12.276	2721800	2	0	0	0	0	0	0	0	1132800	0	0	0	1589000	0	0	0	0	0	0	0	1	0	1	0	0
22.8005	21.8037	21.4143	23.5504	23.3951	22.9398	23.0854	23.212	22.4053	22.3572	NaN	22.4435				4	4	4	17.6	17.6	17.6	43.974	0	82.163	72940000	12	5292100	4572400	6221600	26117000	8728500	288880	134530	156720	10395000	6315400	0	4716800	0	1	1	1	3	2	1	1	0	2	0	0
27.607	27.6871	27.9235	21.1894	21.835	21.6079	19.5012	19.7331	18.2278	19.3897	19.3606	19.2798				18	18	9	51.7	51.7	30	45.205	0	294.47	866770000	35	189990000	224800000	399810000	7416500	9962600	6065200	4745700	4289600	514260	4716900	8297500	6165800	12	10	10	1	2	0	0	0	0	0	0	0
20.7529	NaN	NaN	21.7306	21.7716	21.6231	22.9639	22.4947	20.2186	21.695	22.0464	NaN				6	6	6	8.9	8.9	8.9	90.568	0	133.29	37933000	10	1172300	166970	169680	1869700	2815400	1391900	11245000	10927000	1400100	1889400	4528200	357760	1	0	0	1	0	0	2	2	1	2	1	0
NaN	NaN	21.7176	23.7044	23.7037	23.2412	20.3028	NaN	21.6833	23.693	22.2351	21.8126				4	4	4	7	7	7	67.791	0	32.227	67098000	17	0	0	4726100	9203400	14765000	5156000	102740	0	3908100	16765000	6412200	6059100	0	0	0	2	2	1	1	1	2	4	3	1
23.0127	26.262	24.1907	19.6349	19.2677	NaN	16.0685	20.3736	16.3637	NaN	16.5811	NaN				15	15	15	45.5	45.5	45.5	52.602	0	253.39	141690000	32	28461000	62789000	45982000	935840	882410	0	20021	2401100	36419	0	184060	0	5	14	11	0	1	0	0	1	0	0	0	0
26.4651	26.4721	24.9434	22.3001	NaN	NaN	23.1832	NaN	NaN	NaN	22.9474	NaN				6	6	6	18.9	18.9	18.9	47.65	0	47.309	299750000	8	77864000	112600000	101110000	2531600	0	0	4215300	0	0	0	1429500	0	3	3	2	0	0	0	0	0	0	0	0	0
26.8999	25.7188	25.2442	24.0016	23.132	22.6499	24.3817	24.4672	23.208	23.4929	23.3329	23.5732				21	21	21	20.6	20.6	20.6	163.29	0	243.18	395860000	31	116970000	62914000	75177000	11838000	5805300	3797300	21079000	7309500	11710000	42744000	9266000	27246000	10	6	6	1	0	0	2	2	1	2	0	1
26.3404	25.1729	25.5942	26.057	26.277	25.9124	26.2736	26.1507	26.111	25.7645	26.2731	25.7586				37	37	37	26.5	26.5	26.5	187.15	0	323.31	888010000	132	109200000	28646000	38823000	59571000	59982000	19075000	143010000	63384000	58312000	158550000	82998000	66457000	16	8	6	5	13	9	14	13	6	16	15	11
22.17	22.6807	21.6458	25.4376	26.1031	24.5664	24.8769	25.7739	24.7788	26.8592	26.1304	25.8602				21	21	3	30.7	30.7	5	71.957	0	323.31	604620000	70	21776000	23452000	18837000	28779000	54816000	14638000	23710000	70524000	56878000	120070000	79302000	91840000	0	1	1	9	8	3	6	9	4	6	11	12
NaN	21.8899	21.7527	21.3665	NaN	NaN	NaN	NaN	NaN	21.6018	NaN	21.1181				19	1	1	41.9	3	3	47.883	0	11.02	19306000	1	0	6169900	5355400	1701100	0	0	0	0	0	4145700	0	1933500	0	0	0	1	0	0	0	0	0	0	0	0
22.4801	21.6379	22.2831	NaN	NaN	NaN	NaN	NaN	22.1614	22.2046	20.6802	22.0227				2	2	2	24.8	24.8	24.8	12.283	0	23.974	38796000	5	5314100	6109000	16629000	0	0	0	0	0	2825800	4035800	1694000	2188100	0	1	1	0	0	0	0	0	0	1	1	1
NaN	20.0764	18.1774	16.7742	17.9335	NaN	17.0597	NaN	17.5145	NaN	17.5894	NaN				2	2	2	17	17	17	12.042	0	12.236	3002200	3	0	1646700	793600	24592	179300	0	62566	0	142020	0	153400	0	0	3	0	0	0	0	0	0	0	0	0	0
29.1848	29.0697	28.688	27.8543	27.7136	27.6047	28.1153	27.5606	28.1513	29.1526	28.3511	28.304				8	8	8	82.2	82.2	82.2	11.765	0	323.31	5042900000	159	728670000	271610000	336040000	124620000	159470000	172160000	379460000	341410000	821520000	771070000	368360000	568540000	17	12	11	12	13	14	14	9	17	15	15	10
25.8961	24.2696	25.3204	25.2161	24.6553	24.1636	25.1683	25.3011	25.2572	26.8811	26.0107	25.6361				11	11	11	30.2	30.2	30.2	49.439	0	157.51	681980000	28	50563000	34882000	41099000	22062000	23121000	8389700	56131000	41529000	80237000	178400000	88969000	56588000	1	1	0	1	0	1	3	3	1	9	5	3
31.8974	32.1038	31.794	32.8058	32.6093	33.3247	30.9475	30.6427	31.1756	29.8172	29.47	30.0132				30	30	29	76.8	76.8	76.8	30.777	0	323.31	43661000000	460	2717100000	4228300000	4343400000	4653600000	6705800000	6608900000	2425600000	3242000000	4373200000	1728800000	1268400000	1366000000	31	44	42	63	65	75	31	28	32	15	17	17
25.7626	25.8388	26.0406	28.3755	28.5609	28.8788	28.7785	29.5645	29.3572	28.7	28.9157	29.0771				21	21	21	65	65	65	36.154	0	323.31	5438700000	110	30418000	45888000	58011000	208120000	249320000	300150000	637720000	1020800000	749750000	581750000	885120000	671670000	4	5	3	6	8	8	7	8	15	17	11	18
26.1229	26.4243	25.3596	28.247	26.9041	28.5877	25.0429	25.1632	25.4258	24.4251	23.409	24.2098				7	7	7	51.9	51.9	51.9	14.914	0	194.02	1041500000	58	78423000	53848000	81549000	141060000	66937000	289260000	46683000	84395000	87084000	50242000	7414500	54614000	5	5	2	11	5	13	7	4	2	2	1	1
28.374	28.535	28.8319	32.392	32.2305	32.9563	30.6089	30.5859	30.4538	29.3616	29.1558	28.8169				36	36	36	66.5	66.5	66.5	69.756	0	323.31	23218000000	324	232640000	198310000	403660000	3999700000	3747800000	4449800000	2883200000	2619600000	1883500000	1305900000	1067000000	426470000	11	12	13	43	47	69	32	27	23	16	16	15
27.8011	27.6263	28.1235	31.8704	31.5723	31.5918	29.2608	29.2	29.2363	28.3198	27.7186	27.6226				33	33	29	70.1	70.1	63.3	55.928	0	323.31	11584000000	312	112180000	146670000	204930000	2328500000	3047000000	2281700000	1028600000	843850000	662030000	448460000	349460000	130240000	10	9	18	49	59	64	21	19	17	20	15	11
28.3453	27.8403	27.444	32.0964	31.5405	31.9313	29.8595	29.6824	29.2393	29.0977	28.2703	27.8546				32	32	18	67.3	67.3	49.9	49.496	0	323.31	13200000000	228	222810000	162550000	188410000	2781300000	2669300000	3042000000	1142000000	689130000	987090000	762940000	216210000	336170000	7	6	4	48	40	48	15	13	15	7	14	11
NaN	NaN	NaN	25.854	25.8994	26.0432	26.6599	26.9072	27.3297	28.1373	27.6602	27.842				6	6	6	29	29	29	26.016	0	48.495	1687500000	19	0	0	0	9009900	23294000	14343000	80115000	92391000	201460000	597610000	185370000	483940000	0	0	0	0	0	1	3	2	2	6	1	4
22.8368	21.6682	21.8984	25.3485	25.1424	24.5456	26.7327	27.0237	27.4805	30.6968	27.7623	29.1186				6	6	6	26.1	26.1	26.1	25.773	0	222.65	3812600000	34	2676900	718710	1038100	75904000	49665000	37498000	343770000	205610000	448010000	1230500000	439620000	977610000	0	0	0	3	3	1	4	3	5	6	4	5
22.0378	22.0813	19.9798	19.3174	NaN	18.3626	18.8527	NaN	NaN	NaN	19.265	18.8895				3	3	3	13	13	13	38.298	0	63.15	15538000	6	3079200	7985500	3618300	118720	0	74356	135940	0	0	0	301950	224370	1	1	1	0	0	1	0	0	0	0	1	1
23.4292	22.9014	22.7121	NaN	NaN	NaN	NaN	NaN	NaN	NaN	NaN	NaN				3	3	3	12.4	12.4	12.4	38.177	0	18.94	32327000	3	10095000	8494200	13737000	0	0	0	0	0	0	0	0	0	2	0	1	0	0	0	0	0	0	0	0	0
22.8719	21.8421	22.4633	24.9284	24.7795	24.9131	23.9204	24.2683	22.3527	23.278	24.5315	22.3899				12	12	12	6.5	6.5	6.5	239.62	0	148.73	166700000	22	3307400	4406000	11039000	37141000	26835000	23835000	16713000	10306000	7445700	13995000	3606200	8066700	3	1	2	4	3	2	1	1	1	2	1	1
18.9549	19.0016	19.0276	18.064	17.7639	18.0509	18.212	18.3391	15.5183	17.4307	17.809	16.7833				2	2	2	6.5	6.5	6.5	38.999	0	12.545	4029800	3	616100	754560	946430	155730	166600	142460	311110	378890	65680	171660	240690	79860	0	1	0	0	0	0	0	0	1	1	0	0
24.1349	25.1803	24.702	NaN	NaN	NaN	NaN	NaN	NaN	NaN	NaN	NaN				4	2	2	29.4	20.9	20.9	23.511	0	43.818	112010000	7	7471300	83659000	20883000	0	0	0	0	0	0	0	0	0	1	2	4	0	0	0	0	0	0	0	0	0
23.458	26.0718	25.9079	22.881	NaN	22.7277	23.6636	20.7714	20.7028	22.6522	21.4173	21.4381				4	4	3	11.7	11.7	8.4	39.34	0	93.893	247660000	7	15583000	103620000	93913000	1944000	0	2053200	6466300	1147600	3963100	11942000	1687500	5340700	2	2	1	0	0	0	0	0	0	1	0	1
28.9576	29.1527	29.1823	23.266	18.9697	18.0088	21.0175	19.1333	18.7294	19.5429	NaN	18.6604				35	35	35	57.3	57.3	57.3	77.063	0	323.31	2231200000	103	501790000	759720000	936580000	6501800	2865900	918070	7396400	3075000	1299500	8036700	0	3005400	31	35	36	1	0	0	0	0	0	0	0	0
23.856	24.546	24.0893	NaN	NaN	NaN	NaN	NaN	NaN	NaN	NaN	NaN				4	4	4	11.7	11.7	11.7	51.676	0	39.578	73493000	5	16476000	29285000	27732000	0	0	0	0	0	0	0	0	0	1	3	1	0	0	0	0	0	0	0	0	0
NaN	NaN	NaN	23.5072	24.6313	24.1492	24.3894	24.014	24.9562	24.5524	24.9126	25.4857				12	12	12	18.9	18.9	18.9	70.108	0	86.086	260210000	20	0	0	0	10483000	10801000	16645000	20378000	17345000	13455000	83512000	26681000	60910000	0	0	0	0	0	0	1	3	4	4	1	7
22.3376	22.3312	21.2308	NaN	21.1029	22.0392	22.5736	22.2039	22.3526	22.5207	20.6893	21.6078				2	2	2	4.6	4.6	4.6	54.305	0	18.809	54925000	5	4569400	5872700	4025300	0	2247700	1663900	10814000	5639900	7287500	7447600	1972700	3384500	0	0	1	0	1	0	0	0	0	1	2	0
26.7964	24.1982	24.3198	30.7317	30.7925	30.5053	32.4948	33.1814	31.897	31.9076	32.9548	32.0871				252	252	248	64	64	63.4	515.6	0	323.31	51351000000	1774	239480000	147540000	225750000	581360000	800620000	380690000	5515400000	7685300000	7958600000	9255100000	8294200000	10268000000	4	0	0	62	77	35	234	306	260	239	284	273
22.1474	24.2641	23.3875	28.7234	28.4642	28.1893	28.7052	28.4229	28.7323	29.5377	29.1741	29.7748				17	17	17	36.6	36.6	36.6	59.578	0	323.31	5347400000	208	10696000	40982000	38551000	282110000	317330000	171510000	541450000	407070000	682470000	940240000	837800000	1077100000	1	2	1	21	15	14	17	22	20	27	35	33
22.8532	23.3117	23.3009	NaN	NaN	22.8303	NaN	NaN	NaN	NaN	NaN	NaN				5	5	5	13.3	13.3	13.3	54.253	0	58.263	45372000	8	7259200	22370000	14747000	0	0	995010	0	0	0	0	0	0	2	3	3	0	0	0	0	0	0	0	0	0
24.9552	21.9088	24.3939	23.6448	25.0738	23.7438	24.5471	24.7273	24.5558	22.3885	24.1194	24.088			+	17	17	11	28.4	28.4	19.1	66.038	0	318.02	269800000	47	26045000	3160000	29324000	4094400	47541000	3885100	17931000	59411000	26656000	9399700	20863000	21494000	4	0	5	2	6	4	4	8	3	1	4	6
NaN	NaN	NaN	22.1887	22.0581	22.5008	21.5811	22.0341	21.7655	20.8748	22.8121	22.4562				3	3	3	8.6	8.6	8.6	45.674	0	21.67	40041000	5	0	0	0	4967200	75346	5397900	3927000	5391000	3636400	729450	7056600	8860500	0	0	0	0	0	1	1	0	0	1	2	0
NaN	18.9757	NaN	NaN	NaN	NaN	NaN	NaN	NaN	20.8672	NaN	NaN				1	1	1	1.8	1.8	1.8	57.07	0	12.789	3299200	3	0	699520	0	0	0	0	0	0	0	2599700	0	0	0	0	0	0	0	0	1	1	0	1	0	0
18.5635	19.639	18.078	17.7881	20.2057	18.8657	18.6345	19.2414	20.7961	18.3263	21.0167	19.5576				3	3	3	29.8	29.8	29.8	13.38	0	23.677	11922000	8	1133700	147040	1748500	26685	149750	60638	92409	163360	2049600	2242800	1752100	2355000	1	1	1	0	1	0	0	0	1	1	1	1
23.9396	23.7756	22.9424	26.1743	26.3874	25.9802	25.7149	25.5473	24.761	25.6558	25.9325	25.0931			+	15	15	15	25.6	25.6	25.6	85.696	0	232.97	560530000	45	7943700	14274000	18071000	72302000	81005000	34387000	46792000	29146000	26266000	95593000	89783000	44965000	2	2	1	5	12	3	3	2	3	4	5	3
27.0079	25.9556	26.2556	25.9602	25.4165	25.7796	24.2964	24.0351	23.6524	23.4422	23.5824	22.1763				10	10	9	24.5	24.5	21.5	45.371	0	114.63	570460000	19	91540000	128890000	149420000	39339000	45794000	36233000	12936000	19704000	18444000	14714000	8202800	5243400	3	3	1	3	4	0	0	0	1	0	2	2
20.9199	21.1423	20.8589	22.4249	21.8281	NaN	24.077	22.2385	22.7237	24.8076	23.0267	23.7381				7	7	7	16.3	16.3	16.3	65.163	0	189.67	118920000	16	1141300	1769000	1105500	2029900	4855900	0	17561000	6022800	3167900	45318000	18714000	17234000	1	2	1	1	0	0	1	1	1	3	2	3
NaN	NaN	NaN	NaN	NaN	NaN	NaN	NaN	NaN	21.2414	NaN	21.2704				2	2	2	17.8	17.8	17.8	22.277	0	21.765	6558100	4	0	0	0	0	0	0	0	0	0	3974600	0	2583600	0	0	0	0	0	0	0	0	1	2	0	1
19.6148	21.7884	20.3685	NaN	NaN	NaN	NaN	NaN	NaN	NaN	NaN	NaN				4	4	4	15.3	15.3	15.3	45.14	0	71.552	7632300	5	750360	5631500	1250400	0	0	0	0	0	0	0	0	0	1	2	2	0	0	0	0	0	0	0	0	0
20.9911	NaN	20.8448	23.7926	22.2268	20.7115	25.4426	24.4008	24.0926	22.8511	24.8689	23.4565				8	8	8	17	17	17	501.31	0	91.086	189340000	28	494160	0	574550	6347500	3172300	167750	35304000	41377000	29641000	23484000	30072000	18702000	0	0	0	2	1	0	6	4	5	1	6	3
NaN	21.6115	NaN	NaN	NaN	NaN	NaN	NaN	NaN	NaN	NaN	NaN				2	2	2	1.8	1.8	1.8	139.09	0	11.671	4347700	2	0	4347700	0	0	0	0	0	0	0	0	0	0	0	1	1	0	0	0	0	0	0	0	0	0
23.4312	24.3578	23.8903	NaN	NaN	NaN	20.9994	18.5422	17.9853	18.8779	NaN	19.8989				6	6	6	20.4	20.4	20.4	54.565	0	67.067	67584000	10	10337000	26474000	23408000	0	0	0	4228200	246690	166930	1805100	0	918360	2	4	4	0	0	0	0	0	0	0	0	0
29.1155	27.9641	27.9463	25.6593	26.0675	25.601	26.8289	27.1478	25.8434	27.0987	26.4297	26.1084				6	6	2	82.1	82.1	27.4	11.265	0	280.57	2308100000	47	42330000	251190000	278760000	34334000	102280000	35875000	323240000	246720000	194420000	354620000	344580000	99726000	6	6	6	1	3	3	5	2	3	5	2	5
23.6631	23.7028	22.9351	21.5617	23.2151	22.7196	21.5691	22.5885	22.1792	22.4069	22.3185	22.075				7	7	7	23.3	23.3	23.3	48.803	0	145.62	105260000	14	13037000	27967000	25619000	2288400	854190	342810	218650	4623200	10922000	8524400	3711200	7148800	4	2	1	2	0	0	0	2	1	1	1	0
NaN	16.4141	NaN	NaN	NaN	NaN	19.2395	NaN	NaN	NaN	NaN	NaN				1	1	1	7	7	7	22.963	0	7.5957	795150	1	0	118490	0	0	0	0	676660	0	0	0	0	0	0	0	0	0	0	0	1	0	0	0	0	0
24.0121	23.8754	26.1076	NaN	21.8833	NaN	NaN	NaN	NaN	21.352	NaN	21.8375				7	7	5	39.8	39.8	31.3	23.602	0	179.76	148360000	14	27173000	53252000	63196000	0	1610100	0	0	0	0	1123100	0	2007700	1	5	8	0	0	0	0	0	0	0	0	0
21.1686	NaN	19.4222	NaN	20.6849	NaN	22.4236	21.4394	21.9379	21.0606	19.7295	20.9493				3	3	3	4	4	4	105.21	0	25.288	26631000	6	2930400	0	189910	0	916170	0	4992300	3622500	5532500	5459800	674860	2312200	1	0	0	0	1	0	2	0	2	0	0	0
19.9054	19.866	NaN	NaN	NaN	NaN	NaN	NaN	NaN	NaN	NaN	NaN			+	2	2	2	2.4	2.4	2.4	101.39	0	11.711	7967400	2	982040	1296600	0	0	0	0	0	0	3607600	2081200	0	0	1	0	0	0	0	0	0	0	1	0	0	0
22.0941	21.4562	18.9895	20.3092	NaN	NaN	NaN	NaN	17.7458	NaN	NaN	NaN				3	3	3	9.5	9.5	9.5	60.556	0	35.172	10589000	5	5069000	2584000	2364700	404220	0	0	0	0	167430	0	0	0	2	1	1	1	0	0	0	0	0	0	0	0
22.7414	23.4819	22.6417	NaN	NaN	NaN	NaN	NaN	NaN	NaN	NaN	NaN				5	5	5	23.8	23.8	23.8	34.258	0	140.43	32325000	10	6883700	15047000	10394000	0	0	0	0	0	0	0	0	0	2	5	3	0	0	0	0	0	0	0	0	0
NaN	NaN	NaN	23.2895	23.2738	23.0307	21.7619	22.3736	22.0623	21.124	20.8871	21.1323				6	6	6	21.1	21.1	21.1	39.731	0	167.08	45009000	20	0	0	0	7018600	13675000	3980900	2453400	6090300	4601600	3033800	1939500	2215900	0	1	0	2	4	3	0	3	2	2	1	2
20.3433	21.6259	20.3644	21.6608	22.1184	23.0028	22.0281	22.4426	22.0177	22.825	24.1208	23.5451				5	5	5	11.4	11.4	11.4	66.034	0	91.331	85060000	15	598620	1118500	877880	2373500	4424600	3443900	6763600	14319000	6588200	10846000	21110000	12597000	0	0	0	1	1	2	2	1	1	3	3	1
NaN	20.1331	19.1349	NaN	NaN	NaN	NaN	NaN	NaN	NaN	NaN	NaN				2	2	2	7.2	7.2	7.2	46.312	0	37.889	2386900	2	0	1425200	961750	0	0	0	0	0	0	0	0	0	0	0	2	0	0	0	0	0	0	0	0	0
22.5747	22.2934	22.5051	NaN	NaN	NaN	NaN	NaN	NaN	NaN	NaN	NaN				7	7	7	14.7	14.7	14.7	69.068	0	101.97	21831000	9	5852600	7720300	8258000	0	0	0	0	0	0	0	0	0	3	4	2	0	0	0	0	0	0	0	0	0
NaN	20.4393	NaN	NaN	NaN	NaN	NaN	NaN	NaN	NaN	NaN	NaN			+	2	2	2	7.7	7.7	7.7	38.429	0	48.849	1929300	3	0	1929300	0	0	0	0	0	0	0	0	0	0	1	1	1	0	0	0	0	0	0	0	0	0
NaN	NaN	NaN	23.1769	21.6609	23.3998	22.7573	23.0084	23.9103	23.7331	22.2434	24.0394				3	3	3	18.1	18.1	18.1	14.553	0	23.665	105250000	3	0	0	0	4177400	3385700	4883900	4625100	6407500	19335000	22423000	8785100	31230000	0	0	0	0	1	0	0	0	0	0	2	0
23.6828	24.0599	23.4352	NaN	NaN	NaN	NaN	NaN	NaN	NaN	NaN	NaN				6	6	4	53.1	53.1	40.1	15.998	0	141.84	52876000	10	15288000	17731000	19858000	0	0	0	0	0	0	0	0	0	3	4	3	0	0	0	0	0	0	0	0	0
NaN	NaN	NaN	NaN	NaN	NaN	24.1798	24.3322	24.4878	20.7101	NaN	NaN				7	7	7	14.4	14.4	14.4	59.864	0	88.505	80133000	12	0	0	0	0	0	0	15427000	23036000	39875000	1794200	0	0	0	0	0	0	0	0	2	5	5	0	0	0
23.2832	23.9649	22.4794	23.7543	23.243	23.2017	22.6336	22.8742	21.8858	20.4958	22.1261	21.4144				7	7	7	9.2	9.2	9.2	103.36	0	48.339	101800000	20	20783000	6962600	29488000	7312900	4364000	5273800	400050	4818300	6081100	11784000	331030	4197700	2	4	1	3	2	1	1	3	1	0	1	1
NaN	NaN	NaN	NaN	NaN	NaN	NaN	NaN	NaN	NaN	NaN	18.9132				1	1	1	22.5	22.5	22.5	13.988	0	29.361	611930	1	0	0	0	0	0	0	0	0	0	0	0	611930	0	0	0	0	0	0	0	0	0	0	0	1
22.2343	22.2464	21.3334	NaN	21.4935	NaN	22.3856	20.3626	19.5867	22.2735	22.4408	20.516				1	1	1	0.2	0.2	0.2	771.15	0	9.2995	53104000	3	4997900	6857600	3095800	0	2351100	0	6283700	1033800	1149500	7043100	16184000	4108400	0	0	0	0	0	0	0	0	1	0	1	1
NaN	NaN	NaN	NaN	NaN	NaN	NaN	NaN	17.7473	NaN	NaN	NaN				1	1	1	2.9	2.9	2.9	35.026	0	7.0805	290600	1	0	0	0	0	0	0	0	0	290600	0	0	0	0	0	0	0	0	0	0	0	1	0	0	0
NaN	NaN	NaN	NaN	NaN	NaN	NaN	NaN	NaN	19.9268	NaN	19.9116				1	1	1	1.1	1.1	1.1	102.51	0	7.5215	2577200	1	0	0	0	0	0	0	0	0	0	1354700	0	1222500	0	0	0	0	0	0	0	0	0	0	0	1
19.5038	18.9663	19.6681	NaN	NaN	NaN	NaN	NaN	NaN	NaN	NaN	NaN				2	2	2	5.2	5.2	5.2	62.216	0	11.244	2646600	2	689040	725040	1232500	0	0	0	0	0	0	0	0	0	0	1	1	0	0	0	0	0	0	0	0	0
NaN	NaN	NaN	NaN	NaN	NaN	21.7506	22.1176	23.1428	23.0784	22.7357	23.6889				1	1	1	3.3	3.3	3.3	52.263	0	13.352	86196000	9	0	0	0	0	0	0	3857300	5308500	22648000	12038000	17629000	24716000	0	0	0	0	0	1	1	1	2	1	1	2
NaN	NaN	NaN	NaN	NaN	NaN	NaN	NaN	NaN	NaN	NaN	25.2538				1	1	1	1.4	1.4	1.4	99.914	0	6.1954	246150000	0	0	0	0	3883100	3236100	2931100	38629000	48980000	50808000	3273300	44820000	49594000	0	0	0	0	0	0	0	0	0	0	0	0
NaN	NaN	NaN	NaN	NaN	NaN	20.0643	21.2845	21.791	21.5729	20.4559	21.6631				2	2	2	5.1	5.1	5.1	48.506	0	12.541	19221000	3	0	0	0	0	0	0	1317700	2497700	5706700	4340400	873000	4486000	0	0	0	0	0	0	1	0	0	1	0	1
[truncated: 6 more columns]

## Sheet: table5
Table 5. Pearson correlation
Plasma1	Plasma2	Plasma3	NUAP1	NUAP2	NUAP3	ZFP1	ZFP2	ZFP3	ZWP1	ZWP2	ZWP3	Group1	Name
#!{Type}E	E	E	E	E	E	E	E	E	E	E	E	C	T
#!{C:Group1}Plasma	Plasma	Plasma	NUAP	NUAP	NUAP	ZFP	ZFP	ZFP	ZWP	ZWP	ZWP
NaN	0.925275	0.946256	0.660396	0.577793	0.577713	0.63364	0.504683	0.530324	0.550969	0.550975	0.509733	Plasma	Plasma1
0.925275	NaN	0.953982	0.582547	0.529565	0.506729	0.50471	0.371853	0.395351	0.427254	0.457292	0.3609	Plasma	Plasma2
0.946256	0.953982	NaN	0.655043	0.58109	0.569884	0.575368	0.475349	0.541677	0.460844	0.570262	0.486278	Plasma	Plasma3
0.660396	0.582547	0.655043	NaN	0.954818	0.950479	0.910889	0.878268	0.882305	0.842364	0.863788	0.846731	NUAP	NUAP1
0.577793	0.529565	0.58109	0.954818	NaN	0.918578	0.889129	0.924853	0.898055	0.819674	0.884256	0.834801	NUAP	NUAP2
0.577713	0.506729	0.569884	0.950479	0.918578	NaN	0.920316	0.909559	0.90911	0.842763	0.864628	0.861678	NUAP	NUAP3
0.63364	0.50471	0.575368	0.910889	0.889129	0.920316	NaN	0.944176	0.951118	0.922794	0.948285	0.929223	ZFP	ZFP1
0.504683	0.371853	0.475349	0.878268	0.924853	0.909559	0.944176	NaN	0.957693	0.892378	0.939281	0.919275	ZFP	ZFP2
0.530324	0.395351	0.541677	0.882305	0.898055	0.90911	0.951118	0.957693	NaN	0.922959	0.945382	0.964837	ZFP	ZFP3
0.550969	0.427254	0.460844	0.842364	0.819674	0.842763	0.922794	0.892378	0.922959	NaN	0.934609	0.960874	ZWP	ZWP1
0.550975	0.457292	0.570262	0.863788	0.884256	0.864628	0.948285	0.939281	0.945382	0.934609	NaN	0.946692	ZWP	ZWP2
0.509733	0.3609	0.486278	0.846731	0.834801	0.861678	0.929223	0.919275	0.964837	0.960874	0.946692	NaN	ZWP	ZWP3

## Sheet: table6
Table 6. Differencial expressed proteins - ANOVA - significance level 5%
Corrected p-value: Benjamini Hockberg
Posthoc test
Plasma1	Plasma2	Plasma3	NUAP1	NUAP2	NUAP3	ZFP1	ZFP2	ZFP3	ZWP1	ZWP2	ZWP3	ANOVA p value	Corrected p-value	Protein IDs	Majority protein IDs	Protein names	Gene names	Significant pairs	Fasta headers
#!{C:Group1}Plasma	Plasma	Plasma	NUAP	NUAP	NUAP	ZFP	ZFP	ZFP	ZWP	ZWP	ZWP		Benjamini Hockberg					T
27.607	27.6871	27.9235	21.1894	21.835	21.6079	19.5012	19.7331	18.2278	19.3897	19.3606	19.2798	3.39279e-08	4.81775e-06	P00738;J3QR68;H0Y300;A0A0C4DGL8;P00738-2;J3QLC9;A0A087WU08;H3BS21;J3KRH2;J3KTC3;J3KSV1;J3QQI8;H3BMJ7	P00738;J3QR68;H0Y300;A0A0C4DGL8;P00738-2;J3QLC9;A0A087WU08	Haptoglobin;Haptoglobin alpha chain;Haptoglobin beta chain	HP	NUAP_ZFP;Plasma_ZFP;NUAP_ZWP;Plasma_ZWP;Plasma_NUAP	sp|P00738|HPT_HUMAN Haptoglobin OS=Homo sapiens OX=9606 GN=HP PE=1 SV=1;tr|J3QR68|J3QR68_HUMAN Isoform of P00738, Haptoglobin (Fragment) OS=Homo sapiens OX=9606 GN=HP PE=1 SV=1;tr|H0Y300|H0Y300_HUMAN Isoform of P00738, Haptoglobin OS=Homo sapiens OX=9606 G
27.8011	27.6263	28.1235	31.8704	31.5723	31.5918	29.2608	29.2	29.2363	28.3198	27.7186	27.6226	1.57565e-07	1.11871e-05	P02675;D6REL8	P02675;D6REL8	Fibrinogen beta chain;Fibrinopeptide B;Fibrinogen beta chain	FGB	ZFP_Plasma;NUAP_Plasma;ZFP_ZWP;NUAP_ZWP;NUAP_ZFP	sp|P02675|FIBB_HUMAN Fibrinogen beta chain OS=Homo sapiens OX=9606 GN=FGB PE=1 SV=2;tr|D6REL8|D6REL8_HUMAN Isoform of P02675, Fibrinogen beta chain OS=Homo sapiens OX=9606 GN=FGB PE=1 SV=1
28.374	28.535	28.8319	32.392	32.2305	32.9563	30.6089	30.5859	30.4538	29.3616	29.1558	28.8169	3.68968e-07	1.74645e-05	P02671-2;P02671;A0A087WUA0;CON__P02672	P02671-2;P02671	Fibrinogen alpha chain;Fibrinopeptide A;Fibrinogen alpha chain	FGA	ZFP_Plasma;NUAP_Plasma;ZFP_ZWP;NUAP_ZWP;NUAP_ZFP	sp|P02671-2|FIBA-2_HUMAN Isoform of P02671, Isoform 2 of Fibrinogen alpha chain OS=Homo sapiens OX=9606 GN=FGA PE=1 SV=2;sp|P02671|FIBA_HUMAN Fibrinogen alpha chain OS=Homo sapiens OX=9606 GN=FGA PE=1 SV=2
25.7626	25.8388	26.0406	28.3755	28.5609	28.8788	28.7785	29.5645	29.3572	28.7	28.9157	29.0771	1.16403e-06	4.1323e-05	P02649;H0Y7L5;E9PEV4;E7ERP7;CON__Q03247	P02649;H0Y7L5;E9PEV4;E7ERP7	Apolipoprotein E	APOE	NUAP_Plasma;ZWP_Plasma;ZFP_Plasma	sp|P02649|APOE_HUMAN Apolipoprotein E OS=Homo sapiens OX=9606 GN=APOE PE=1 SV=1;tr|H0Y7L5|H0Y7L5_HUMAN Isoform of P02649, Apolipoprotein E (Fragment) OS=Homo sapiens OX=9606 GN=APOE PE=1 SV=2;tr|E9PEV4|E9PEV4_HUMAN Isoform of P02649, Apolipoprotein E (Frag
22.1474	24.2641	23.3875	28.7234	28.4642	28.1893	28.7052	28.4229	28.7323	29.5377	29.1741	29.7748	3.78837e-06	8.50882e-05	P04196	P04196	Histidine-rich glycoprotein	HRG	NUAP_Plasma;ZFP_Plasma;ZWP_Plasma	sp|P04196|HRG_HUMAN Histidine-rich glycoprotein OS=Homo sapiens OX=9606 GN=HRG PE=1 SV=1
33.6936	34.3113	33.9139	29.6777	29.3304	28.2135	28.657	28.3128	27.4509	28.6679	28.427	27.8111	3.8437e-06	8.50882e-05	CON__P02768-1;P02768;A0A0C4DGB6;B7WNR0;H0YA55;D6RHD5;A0A087WWT3;P02768-3;C9JKR2;P02768-2;H7C013	CON__P02768-1;P02768;A0A0C4DGB6;B7WNR0;H0YA55;D6RHD5;A0A087WWT3;P02768-3;C9JKR2;P02768-2	Serum albumin	ALB	Plasma_ZFP;Plasma_ZWP;Plasma_NUAP	;sp|P02768|ALBU_HUMAN Albumin OS=Homo sapiens OX=9606 GN=ALB PE=1 SV=2;tr|A0A0C4DGB6|A0A0C4DGB6_HUMAN Isoform of P02768, Albumin OS=Homo sapiens OX=9606 GN=ALB PE=1 SV=1;tr|B7WNR0|B7WNR0_HUMAN Isoform of P02768, Albumin OS=Homo sapiens OX=9606 GN=ALB PE=1
31.8974	32.1038	31.794	32.8058	32.6093	33.3247	30.9475	30.6427	31.1756	29.8172	29.47	30.0132	4.19449e-06	8.50882e-05	P02647;F8W696	P02647;F8W696	Apolipoprotein A-I;Proapolipoprotein A-I;Truncated apolipoprotein A-I	APOA1	ZFP_ZWP;Plasma_ZWP;NUAP_ZWP;Plasma_ZFP;NUAP_ZFP;NUAP_Plasma	sp|P02647|APOA1_HUMAN Apolipoprotein A-I OS=Homo sapiens OX=9606 GN=APOA1 PE=1 SV=1;tr|F8W696|F8W696_HUMAN Isoform of P02647, Apolipoprotein A-I OS=Homo sapiens OX=9606 GN=APOA1 PE=1 SV=1
26.7964	24.1982	24.3198	30.7317	30.7925	30.5053	32.4948	33.1814	31.897	31.9076	32.9548	32.0871	1.61422e-05	0.000286524	P04114;A8MUN2;A0A669KB70	P04114	Apolipoprotein B-100;Apolipoprotein B-48	APOB	NUAP_Plasma;ZWP_Plasma;ZFP_Plasma	sp|P04114|APOB_HUMAN Apolipoprotein B-100 OS=Homo sapiens OX=9606 GN=APOB PE=1 SV=2
28.3453	27.8403	27.444	32.0964	31.5405	31.9313	29.8595	29.6824	29.2393	29.0977	28.2703	27.8546	1.91256e-05	0.000301759	P02679-2;P02679;C9JEU5;C9JC84	P02679-2;P02679;C9JEU5;C9JC84	Fibrinogen gamma chain	FGG	ZFP_Plasma;NUAP_Plasma;ZFP_ZWP;NUAP_ZWP;NUAP_ZFP	sp|P02679-2|FIBG-2_HUMAN Isoform of P02679, Isoform Gamma-A of Fibrinogen gamma chain OS=Homo sapiens OX=9606 GN=FGG PE=1 SV=3;sp|P02679|FIBG_HUMAN Fibrinogen gamma chain OS=Homo sapiens OX=9606 GN=FGG PE=1 SV=3;tr|C9JEU5|C9JEU5_HUMAN Isoform of P02679, Fi
28.7592	29.7571	28.0962	22.2685	22.5361	19.8364	21.1591	19.5376	18.884	19.4457	20.5136	18.9477	2.16302e-05	0.000307148	A0A024R6I7;P01009;A0A0G2JRN3;P01009-2;P01009-3;G3V2B9;G3V544;G3V5R8;G3V387;A0A0B4J278	A0A024R6I7;P01009;A0A0G2JRN3;P01009-2;P01009-3	Alpha-1-antitrypsin;Short peptide from AAT	SERPINA1	Plasma_ZWP;Plasma_ZFP;Plasma_NUAP	tr|A0A024R6I7|A0A024R6I7_HUMAN Isoform of P01009, Alpha-1-antitrypsin OS=Homo sapiens OX=9606 GN=SERPINA1 PE=1 SV=1;sp|P01009|A1AT_HUMAN Alpha-1-antitrypsin OS=Homo sapiens OX=9606 GN=SERPINA1 PE=1 SV=3;tr|A0A0G2JRN3|A0A0G2JRN3_HUMAN Isoform of P01009, Alp
22.8368	21.6682	21.8984	25.3485	25.1424	24.5456	26.7327	27.0237	27.4805	30.6968	27.7623	29.1186	4.39444e-05	0.000567282	P02747	P02747	Complement C1q subcomponent subunit C	C1QC	NUAP_Plasma;ZFP_Plasma;ZWP_Plasma;ZWP_NUAP	sp|P02747|C1QC_HUMAN Complement C1q subcomponent subunit C OS=Homo sapiens OX=9606 GN=C1QC PE=1 SV=3
NaN	NaN	NaN	23.2895	23.2738	23.0307	21.7619	22.3736	22.0623	21.124	20.8871	21.1323	5.13402e-05	0.000607526	P27169;F8WF42	P27169	Serum paraoxonase/arylesterase 1	PON1	NUAP_ZFP;Plasma_ZFP;Plasma_NUAP	sp|P27169|PON1_HUMAN Serum paraoxonase/arylesterase 1 OS=Homo sapiens OX=9606 GN=PON1 PE=1 SV=3
25.4252	26.6363	26.6413	17.5462	16.9854	19.9802	18.7529	20.1769	NaN	18.5386	17.9261	17.3814	8.12815e-05	0.000887844	D6RF35;P02774;P02774-3;P02774-2;D6RBJ7;CON__Q3MHN5;CON__ENSEMBL:ENSBTAP00000018229;D6RF20	D6RF35;P02774;P02774-3;P02774-2;D6RBJ7	Vitamin D-binding protein	GC	Plasma_ZWP;Plasma_NUAP;Plasma_ZFP	tr|D6RF35|D6RF35_HUMAN Isoform of P02774, Gc-globulin OS=Homo sapiens OX=9606 GN=GC PE=1 SV=1;sp|P02774|VTDB_HUMAN Vitamin D-binding protein OS=Homo sapiens OX=9606 GN=GC PE=1 SV=2;sp|P02774-3|VTDB-3_HUMAN Isoform of P02774, Isoform 3 of Vitamin D-binding
18.4047	18.3337	19.294	19.3542	21.1288	NaN	24.0819	24.1556	23.6347	26.4956	24.8399	24.3191	9.82334e-05	0.000996367	A0A3B3ISR2;B4DPQ0;P00736;F5H2D0;A0A3B3ITU4;F5H1V0;F5H6Y3	A0A3B3ISR2;B4DPQ0;P00736;F5H2D0;A0A3B3ITU4	Complement C1r subcomponent;Complement C1r subcomponent heavy chain;Complement C1r subcomponent light chain	C1R	ZFP_Plasma;ZWP_Plasma;ZFP_NUAP;ZWP_NUAP	tr|A0A3B3ISR2|A0A3B3ISR2_HUMAN Isoform of P00736, Complement subcomponent C1r OS=Homo sapiens OX=9606 GN=C1R PE=1 SV=1;tr|B4DPQ0|B4DPQ0_HUMAN Isoform of P00736, Complement subcomponent C1r OS=Homo sapiens OX=9606 GN=C1R PE=1 SV=1;sp|P00736|C1R_HUMAN Comple
23.9385	23.2413	23.0173	19.9797	20.4582	19.7323	20.2365	20.7085	21.5257	23.0519	22.1175	22.5417	0.000133467	0.00126349	A0A286YEY4;P01859	A0A286YEY4;P01859	Ig gamma-2 chain C region	IGHG2	ZWP_NUAP;Plasma_NUAP;ZWP_ZFP;Plasma_ZFP	tr|A0A286YEY4|A0A286YEY4_HUMAN Isoform of P01859, Immunoglobulin heavy constant gamma 2 (Fragment) OS=Homo sapiens OX=9606 GN=IGHG2 PE=1 SV=1;sp|P01859|IGHG2_HUMAN Immunoglobulin heavy constant gamma 2 OS=Homo sapiens OX=9606 GN=IGHG2 PE=1 SV=2
22.17	22.6807	21.6458	25.4376	26.1031	24.5664	24.8769	25.7739	24.7788	26.8592	26.1304	25.8602	0.000159564	0.00141613	P01042	P01042	Kininogen-1;Kininogen-1 heavy chain;T-kinin;Bradykinin;Lysyl-bradykinin;Kininogen-1 light chain;Low molecular weight growth-promoting factor	KNG1	ZFP_Plasma;NUAP_Plasma;ZWP_Plasma	sp|P01042|KNG1_HUMAN Kininogen-1 OS=Homo sapiens OX=9606 GN=KNG1 PE=1 SV=2
27.0079	25.9556	26.2556	25.9602	25.4165	25.7796	24.2964	24.0351	23.6524	23.4422	23.5824	22.1763	0.000169572	0.00141643	P06727	P06727	Apolipoprotein A-IV	APOA4	NUAP_ZWP;Plasma_ZWP;NUAP_ZFP;Plasma_ZFP	sp|P06727|APOA4_HUMAN Apolipoprotein A-IV OS=Homo sapiens OX=9606 GN=APOA4 PE=1 SV=4
22.5055	22.1867	23.5838	25.198	26.2142	25.7859	25.5106	25.4635	25.1364	26.0383	26.0149	25.283	0.000218075	0.00163053	A0A4W9A917;A0A286YES1;P01860	A0A4W9A917;A0A286YES1;P01860	Ig gamma-3 chain C region	IGHG3	ZFP_Plasma;NUAP_Plasma;ZWP_Plasma	tr|A0A4W9A917|A0A4W9A917_HUMAN Isoform of P01860, Immunoglobulin heavy constant gamma 3 (Fragment) OS=Homo sapiens OX=9606 GN=IGHG3 PE=1 SV=1;tr|A0A286YES1|A0A286YES1_HUMAN Isoform of P01860, Immunoglobulin heavy constant gamma 3 (Fragment) OS=Homo sapiens
NaN	NaN	NaN	25.854	25.8994	26.0432	26.6599	26.9072	27.3297	28.1373	27.6602	27.842	0.00021817	0.00163053	P02745;X6RLJ0	P02745;X6RLJ0	Complement C1q subcomponent subunit A	C1QA	NUAP_Plasma;ZFP_Plasma;ZFP_NUAP	sp|P02745|C1QA_HUMAN Complement C1q subcomponent subunit A OS=Homo sapiens OX=9606 GN=C1QA PE=1 SV=2;tr|X6RLJ0|X6RLJ0_HUMAN Isoform of P02745, Complement C1q subcomponent subunit A (Fragment) OS=Homo sapiens OX=9606 GN=C1QA PE=1 SV=7
26.1229	26.4243	25.3596	28.247	26.9041	28.5877	25.0429	25.1632	25.4258	24.4251	23.409	24.2098	0.000290704	0.002064	V9GYM3;P02652;V9GYE3;V9GYG9;V9GYC1;V9GYS1	V9GYM3;P02652;V9GYE3;V9GYG9;V9GYC1;V9GYS1	Apolipoprotein A-II;Proapolipoprotein A-II;Truncated apolipoprotein A-II	APOA2	Plasma_ZWP;NUAP_ZWP;NUAP_ZFP;NUAP_Plasma	tr|V9GYM3|V9GYM3_HUMAN Isoform of P02652, Apolipoprotein A-II OS=Homo sapiens OX=9606 GN=APOA2 PE=1 SV=1;sp|P02652|APOA2_HUMAN Apolipoprotein A-II OS=Homo sapiens OX=9606 GN=APOA2 PE=1 SV=1;tr|V9GYE3|V9GYE3_HUMAN Isoform of P02652, Apolipoprotein A-II OS=H
22.6274	19.35	21.3549	26.5832	26.4805	26.712	26.3693	27.1955	28.0009	29.771	26.8876	29.4672	0.000307419	0.00207874	D6R934;P02746;A0A0A0MSV6;D6RGJ1	D6R934;P02746;A0A0A0MSV6	Complement C1q subcomponent subunit B	C1QB	NUAP_Plasma;ZFP_Plasma;ZWP_Plasma	tr|D6R934|D6R934_HUMAN Isoform of P02746, Complement C1q subcomponent subunit B OS=Homo sapiens OX=9606 GN=C1QB PE=1 SV=1;sp|P02746|C1QB_HUMAN Complement C1q subcomponent subunit B OS=Homo sapiens OX=9606 GN=C1QB PE=1 SV=3;tr|A0A0A0MSV6|A0A0A0MSV6_HUMAN Is
20.7633	NaN	NaN	23.7164	23.5322	24.0895	25.2146	24.7306	25.2759	26.8869	26.4211	25.9466	0.000337535	0.00215707	H0YAC1;P03952;E9PBC5;C9JCT1;C9J075	H0YAC1;P03952;E9PBC5	Plasma kallikrein;Plasma kallikrein heavy chain;Plasma kallikrein light chain	KLKB1	NUAP_Plasma;ZFP_Plasma;ZFP_NUAP	tr|H0YAC1|H0YAC1_HUMAN Isoform of P03952, Plasma kallikrein (Fragment) OS=Homo sapiens OX=9606 GN=KLKB1 PE=1 SV=1;sp|P03952|KLKB1_HUMAN Plasma kallikrein OS=Homo sapiens OX=9606 GN=KLKB1 PE=1 SV=1;tr|E9PBC5|E9PBC5_HUMAN Isoform of P03952, Plasma kallikrein
26.6782	25.4458	26.4093	17.284	NaN	17.2817	NaN	NaN	NaN	NaN	NaN	NaN	0.000349385	0.00215707	A0A087WT59;P02766	A0A087WT59;P02766	Transthyretin	TTR	Plasma_NUAP	tr|A0A087WT59|A0A087WT59_HUMAN Isoform of P02766, Transthyretin OS=Homo sapiens OX=9606 GN=TTR PE=1 SV=2;sp|P02766|TTHY_HUMAN Transthyretin OS=Homo sapiens OX=9606 GN=TTR PE=1 SV=1
23.9396	23.7756	22.9424	26.1743	26.3874	25.9802	25.7149	25.5473	24.761	25.6558	25.9325	25.0931	0.000460959	0.00261706	P06396;A0A0A0MS51;A0A0A0MT01;P06396-2;P06396-4;P06396-3;CON__Q3SX14;Q5T0I0;A0A0U1RQL8;REV__H0YJM7;REV__A0A6Q8PG26;REV__Q6TDU7-4;REV__Q6TDU7-2;REV__Q6TDU7-3;REV__Q6TDU7;REV__F8W8F9	P06396;A0A0A0MS51;A0A0A0MT01;P06396-2;P06396-4;P06396-3;CON__Q3SX14	Gelsolin	GSN	ZFP_Plasma;ZWP_Plasma;NUAP_Plasma	sp|P06396|GELS_HUMAN Gelsolin OS=Homo sapiens OX=9606 GN=GSN PE=1 SV=1;tr|A0A0A0MS51|A0A0A0MS51_HUMAN Isoform of P06396, Actin-depolymerizing factor OS=Homo sapiens OX=9606 GN=GSN PE=1 SV=1;tr|A0A0A0MT01|A0A0A0MT01_HUMAN Isoform of P06396, Actin-depolymeri
28.9576	29.1527	29.1823	23.266	18.9697	18.0088	21.0175	19.1333	18.7294	19.5429	NaN	18.6604	0.000472475	0.00261706	P02787;F8WCI6;H7C5E8;C9JB55;F8WEK9;C9JVG0;F8WC57	P02787	Serotransferrin	TF	Plasma_ZWP;Plasma_ZFP;Plasma_NUAP	sp|P02787|TRFE_HUMAN Serotransferrin OS=Homo sapiens OX=9606 GN=TF PE=1 SV=3
27.1069	27.4934	27.0576	24.0495	23.1586	24.3734	23.8538	24.1671	23.5472	25.8743	23.8884	24.9403	0.00047918	0.00261706	A0A286YEY1;P01876;A0A0G2JMB2;A0A286YEY5;P01877	A0A286YEY1;P01876;A0A0G2JMB2	Ig alpha-1 chain C region	IGHA1	Plasma_ZFP;Plasma_NUAP;Plasma_ZWP	tr|A0A286YEY1|A0A286YEY1_HUMAN Isoform of P01876, Immunoglobulin heavy constant alpha 1 (Fragment) OS=Homo sapiens OX=9606 GN=IGHA1 PE=1 SV=1;sp|P01876|IGHA1_HUMAN Immunoglobulin heavy constant alpha 1 OS=Homo sapiens OX=9606 GN=IGHA1 PE=1 SV=2;tr|A0A0G2JM
21.8722	22.7982	23.1843	26.3072	27.3317	27.8547	25.6427	27.6326	26.4253	24.6779	26.2483	24.969	0.000697011	0.00366576	A0A096LPE2;P35542	A0A096LPE2;P35542	Serum amyloid A-4 protein	SAA2-SAA4;SAA4	ZWP_Plasma;ZFP_Plasma;NUAP_Plasma	tr|A0A096LPE2|A0A096LPE2_HUMAN SAA2-SAA4 readthrough, SAA2-SAA4 readthrough OS=Homo sapiens OX=9606 GN=SAA2-SAA4 PE=3 SV=1;sp|P35542|SAA4_HUMAN Serum amyloid A-4 protein OS=Homo sapiens OX=9606 GN=SAA4 PE=1 SV=2
23.2819	23.7303	23.5299	22.7265	21.5022	21.8294	20.8592	NaN	21.2229	20.4634	NaN	20.8636	0.00103695	0.00509013	A0A7P0TAP4;A0A7P0Z441;A0A7P0T9S6;A0A7P0TA52;A0A7P0TBH1;A0A7P0T8D1;P01019	A0A7P0TAP4;A0A7P0Z441;A0A7P0T9S6;A0A7P0TA52;A0A7P0TBH1;A0A7P0T8D1;P01019	Angiotensinogen;Angiotensin-1;Angiotensin-2;Angiotensin-3;Angiotensin-4;Angiotensin 1-9;Angiotensin 1-7;Angiotensin 1-5;Angiotensin 1-4	AGT	NUAP_ZWP;Plasma_ZWP;Plasma_ZFP;Plasma_NUAP	tr|A0A7P0TAP4|A0A7P0TAP4_HUMAN Isoform of P01019, Angiotensin 1-10 OS=Homo sapiens OX=9606 GN=AGT PE=1 SV=1;tr|A0A7P0Z441|A0A7P0Z441_HUMAN Isoform of P01019, Angiotensin 1-10 OS=Homo sapiens OX=9606 GN=AGT PE=1 SV=1;tr|A0A7P0T9S6|A0A7P0T9S6_HUMAN Isoform o
25.9349	26.0056	25.5762	23.8221	23.3844	23.4005	22.2301	21.3026	21.8212	24.941	22.5474	24.8099	0.00103953	0.00509013	A0A7I2V2D2;P05155-2;P05155;P05155-3;E9PGN7;H9KV48;A0A087WUD9;A0A7I2V5R3;A0A7I2V2X2;A0A7I2V4I9	A0A7I2V2D2;P05155-2;P05155;P05155-3;E9PGN7;H9KV48;A0A087WUD9;A0A7I2V5R3	Plasma protease C1 inhibitor	SERPING1	ZWP_ZFP;Plasma_ZFP;Plasma_NUAP	tr|A0A7I2V2D2|A0A7I2V2D2_HUMAN Isoform of P05155, Plasma protease C1 inhibitor OS=Homo sapiens OX=9606 GN=SERPING1 PE=1 SV=1;sp|P05155-2|IC1-2_HUMAN Isoform of P05155, Isoform 2 of Plasma protease C1 inhibitor OS=Homo sapiens OX=9606 GN=SERPING1 PE=1 SV=2;
NaN	NaN	NaN	28.4388	26.4922	27.8944	25.3235	25.7026	25.4854	24.4527	23.8963	23.8755	0.00127244	0.00602288	A6NMB1	A6NMB1	Sialic acid-binding Ig-like lectin 16	SIGLEC16	Plasma_ZFP;Plasma_NUAP	sp|A6NMB1|SIG16_HUMAN Sialic acid-binding Ig-like lectin 16 OS=Homo sapiens OX=9606 GN=SIGLEC16 PE=2 SV=3
29.1155	27.9641	27.9463	25.6593	26.0675	25.601	26.8289	27.1478	25.8434	27.0987	26.4297	26.1084	0.00287874	0.0131865	P0DOY3;P0DOY2;P0CF74;A0A5H1ZRQ7;A0M8Q6	P0DOY3;P0DOY2;P0CF74	Ig lambda-6 chain C region	IGLC6	Plasma_NUAP;Plasma_ZWP;Plasma_ZFP	sp|P0DOY3|IGLC3_HUMAN Immunoglobulin lambda constant 3 OS=Homo sapiens OX=9606 GN=IGLC3 PE=1 SV=1;sp|P0DOY2|IGLC2_HUMAN Immunoglobulin lambda constant 2 OS=Homo sapiens OX=9606 GN=IGLC2 PE=1 SV=1;sp|P0CF74|IGLC6_HUMAN Immunoglobulin lambda constant 6 OS=Ho
26.8999	25.7188	25.2442	24.0016	23.132	22.6499	24.3817	24.4672	23.208	23.4929	23.3329	23.5732	0.0036645	0.0162612	P01023;F8W7L3;H0YFH1;CON__ENSEMBL:ENSBTAP00000024146;P20742-2;P20742	P01023	Alpha-2-macroglobulin	A2M	Plasma_NUAP;Plasma_ZWP;Plasma_ZFP	sp|P01023|A2MG_HUMAN Alpha-2-macroglobulin OS=Homo sapiens OX=9606 GN=A2M PE=1 SV=3
20.3433	21.6259	20.3644	21.6608	22.1184	23.0028	22.0281	22.4426	22.0177	22.825	24.1208	23.5451	0.00442781	0.0185502	P35858;P35858-2	P35858;P35858-2	Insulin-like growth factor-binding protein complex acid labile subunit	IGFALS	ZWP_Plasma	sp|P35858|ALS_HUMAN Insulin-like growth factor-binding protein complex acid labile subunit OS=Homo sapiens OX=9606 GN=IGFALS PE=1 SV=1;sp|P35858-2|ALS-2_HUMAN Isoform of P35858, Isoform 2 of Insulin-like growth factor-binding protein complex acid labile su
NaN	NaN	NaN	22.49	22.0435	22.1708	24.0235	25.2924	NaN	23.72	23.9746	24.2664	0.00444159	0.0185502	M0R1V6;M0QZQ3;C9JY79;Q9H254-2;Q9H254-4;Q9H254	M0R1V6;M0QZQ3;C9JY79;Q9H254-2;Q9H254-4;Q9H254	Spectrin beta chain, non-erythrocytic 4	SPTBN4	ZFP_Plasma;NUAP_Plasma	tr|M0R1V6|M0R1V6_HUMAN Isoform of Q9H254, Spectrin beta chain, non-erythrocytic 4 (Fragment) OS=Homo sapiens OX=9606 GN=SPTBN4 PE=1 SV=1;tr|M0QZQ3|M0QZQ3_HUMAN Isoform of Q9H254, Spectrin beta chain OS=Homo sapiens OX=9606 GN=SPTBN4 PE=1 SV=1;tr|C9JY79|C9J
29.1848	29.0697	28.688	27.8543	27.7136	27.6047	28.1153	27.5606	28.1513	29.1526	28.3511	28.304	0.0049218	0.0199685	P01834;A0A5H1ZRQ3	P01834;A0A5H1ZRQ3	Ig kappa chain C region	IGKC	ZWP_NUAP;Plasma_NUAP;Plasma_ZFP	sp|P01834|IGKC_HUMAN Immunoglobulin kappa constant OS=Homo sapiens OX=9606 GN=IGKC PE=1 SV=2;tr|A0A5H1ZRQ3|A0A5H1ZRQ3_HUMAN Isoform of P01834, Immunoglobulin kappa constant (Fragment) OS=Homo sapiens OX=9606 GN=IGKC PE=1 SV=1
21.2882	21.1975	21.1253	22.4211	23.1614	21.8849	22.3934	22.9391	24.4041	24.3215	23.7674	23.4992	0.00533361	0.0210381	A0A0J9YY99;P0DP03;P01768;P0DP02;P01772;P01764	A0A0J9YY99;P0DP03;P01768;P0DP02;P01772;P01764	Ig heavy chain V-III region CAM;Ig heavy chain V-III region KOL;Ig heavy chain V-III region 23	IGHV3-23	ZFP_Plasma;ZWP_Plasma	tr|A0A0J9YY99|A0A0J9YY99_HUMAN Ig-like domain-containing protein (Fragment) OS=Homo sapiens OX=9606 PE=1 SV=1;sp|P0DP03|HVC05_HUMAN Immunoglobulin heavy variable 3-30-5 OS=Homo sapiens OX=9606 GN=IGHV3-30-5 PE=3 SV=1;sp|P01768|HV330_HUMAN Immunoglobulin he
23.4312	24.3578	23.8903	NaN	NaN	NaN	20.9994	18.5422	17.9853	18.8779	NaN	19.8989	0.00625835	0.0240185	P08697;A0A0G2JPA8;P08697-2;C9JMH6;A0A0J9YY65;C9JPV4;A0A0J9YWQ3	P08697;A0A0G2JPA8;P08697-2;C9JMH6;A0A0J9YY65;C9JPV4;A0A0J9YWQ3	Alpha-2-antiplasmin	SERPINF2	Plasma_NUAP;Plasma_ZFP	sp|P08697|A2AP_HUMAN Alpha-2-antiplasmin OS=Homo sapiens OX=9606 GN=SERPINF2 PE=1 SV=3;tr|A0A0G2JPA8|A0A0G2JPA8_HUMAN Isoform of P08697, Alpha-2-antiplasmin OS=Homo sapiens OX=9606 GN=SERPINF2 PE=1 SV=1;sp|P08697-2|A2AP-2_HUMAN Isoform of P08697, Isoform 2
23.7512	22.7612	23.9068	21.842	NaN	21.567	20.5731	20.8995	21.505	21.3585	20.1371	21.8241	0.00646589	0.024162	A0A075B6K5;P80748	A0A075B6K5;P80748	Ig lambda chain V-III region LOI	IGLV3-9	Plasma_ZFP;Plasma_ZWP	sp|A0A075B6K5|LV39_HUMAN Immunoglobulin lambda variable 3-9 OS=Homo sapiens OX=9606 GN=IGLV3-9 PE=3 SV=1;sp|P80748|LV321_HUMAN Immunoglobulin lambda variable 3-21 OS=Homo sapiens OX=9606 GN=IGLV3-21 PE=1 SV=2
22.1429	21.0091	21.8908	24.2286	23.6455	24.1283	23.5678	22.5445	23.7543	24.1425	23.088	24.9924	0.0077182	0.0281022	A0A182DWH7;P49908;A0A182DWH8	A0A182DWH7;P49908	Selenoprotein P	SEPP1	NUAP_Plasma;ZWP_Plasma	tr|A0A182DWH7|A0A182DWH7_HUMAN Isoform of P49908, Selenoprotein P (Fragment) OS=Homo sapiens OX=9606 GN=SELENOP PE=1 SV=1;sp|P49908|SEPP1_HUMAN Selenoprotein P OS=Homo sapiens OX=9606 GN=SELENOP PE=1 SV=3
21.3152	20.29	20.6895	23.178	22.3471	24.6938	23.623	23.057	22.4896	21.6715	22.1138	22.3498	0.00876753	0.0309704	C9JF17;P05090;C9JX71;F8WBT9	C9JF17;P05090	Apolipoprotein D	APOD	ZFP_Plasma;NUAP_Plasma	tr|C9JF17|C9JF17_HUMAN Isoform of P05090, Apolipoprotein D (Fragment) OS=Homo sapiens OX=9606 GN=APOD PE=1 SV=1;sp|P05090|APOD_HUMAN Apolipoprotein D OS=Homo sapiens OX=9606 GN=APOD PE=1 SV=1
25.0588	22.7213	24.7222	21.8603	21.1808	20.6602	22.4348	21.8407	22.7051	22.8442	22.4632	23.0591	0.00894216	0.0309704	A0A0C4DH90;A0A075B6H7;A0A0C4DH55;P01624	A0A0C4DH90;A0A075B6H7;A0A0C4DH55;P01624	Ig kappa chain V-III region POM	IGKV3OR2-268;IGKV3-7;IGKV3D-7	Plasma_NUAP	tr|A0A0C4DH90|A0A0C4DH90_HUMAN Immunoglobulin kappa variable 3/OR2-268 (non-functional) (Fragment) OS=Homo sapiens OX=9606 GN=IGKV3OR2-268 PE=4 SV=5;sp|A0A075B6H7|KV37_HUMAN Probable non-functional immunoglobulin kappa variable 3-7 OS=Homo sapiens OX=9606
20.9199	21.1423	20.8589	22.4249	21.8281	NaN	24.077	22.2385	22.7237	24.8076	23.0267	23.7381	0.0092791	0.0313722	P07357	P07357	Complement component C8 alpha chain	C8A	ZFP_Plasma;ZWP_Plasma	sp|P07357|CO8A_HUMAN Complement component C8 alpha chain OS=Homo sapiens OX=9606 GN=C8A PE=1 SV=2
24.2843	22.2566	22.9476	20.6833	19.6449	NaN	21.5122	21.3434	21.3066	NaN	20.9313	20.7199	0.0109393	0.0361252	H7C5R1;E9PFZ2;P00450;H7C5N5;CON__ENSEMBL:ENSBTAP00000031900	H7C5R1;E9PFZ2;P00450	Ceruloplasmin	CP	Plasma_NUAP;Plasma_ZWP	tr|H7C5R1|H7C5R1_HUMAN Isoform of P00450, Ceruloplasmin (Fragment) OS=Homo sapiens OX=9606 GN=CP PE=1 SV=1;tr|E9PFZ2|E9PFZ2_HUMAN Isoform of P00450, Ceruloplasmin OS=Homo sapiens OX=9606 GN=CP PE=1 SV=1;sp|P00450|CERU_HUMAN Ceruloplasmin OS=Homo sapiens OX
23.2832	23.9649	22.4794	23.7543	23.243	23.2017	22.6336	22.8742	21.8858	20.4958	22.1261	21.4144	0.0142741	0.0460663	Q14624;B7ZKJ8;Q14624-4;Q14624-3;Q14624-2;H7C0L5;CON__Q3T052	Q14624;B7ZKJ8;Q14624-4;Q14624-3;Q14624-2;H7C0L5	Inter-alpha-trypsin inhibitor heavy chain H4;70 kDa inter-alpha-trypsin inhibitor heavy chain H4;35 kDa inter-alpha-trypsin inhibitor heavy chain H4	ITIH4	Plasma_ZWP;NUAP_ZWP	sp|Q14624|ITIH4_HUMAN Inter-alpha-trypsin inhibitor heavy chain H4 OS=Homo sapiens OX=9606 GN=ITIH4 PE=1 SV=4;tr|B7ZKJ8|B7ZKJ8_HUMAN Isoform of Q14624, ITIH4 protein OS=Homo sapiens OX=9606 GN=ITIH4 PE=1 SV=1;sp|Q14624-4|ITIH4-4_HUMAN Isoform of Q14624, Is
23.0127	26.262	24.1907	19.6349	19.2677	NaN	16.0685	20.3736	16.3637	NaN	16.5811	NaN	0.0147802	0.0466397	P01008;CON__P41361	P01008	Antithrombin-III	SERPINC1	Plasma_ZFP	sp|P01008|ANT3_HUMAN Antithrombin-III OS=Homo sapiens OX=9606 GN=SERPINC1 PE=1 SV=1
NaN	NaN	NaN	21.7244	20.5913	NaN	NaN	20.6191	21.0671	23.0737	22.7107	22.5188	0.0201096	0.0620775	A0A0A0MRJ7;P12259;CON__Q28107	A0A0A0MRJ7;P12259	Coagulation factor V;Coagulation factor V heavy chain;Coagulation factor V light chain	F5	ZFP_NUAP;ZFP_Plasma	tr|A0A0A0MRJ7|A0A0A0MRJ7_HUMAN Isoform of P12259, Coagulation factor V OS=Homo sapiens OX=9606 GN=F5 PE=1 SV=1;sp|P12259|FA5_HUMAN Coagulation factor V OS=Homo sapiens OX=9606 GN=F5 PE=1 SV=4
20.9911	NaN	20.8448	23.7926	22.2268	20.7115	25.4426	24.4008	24.0926	22.8511	24.8689	23.4565	0.0247146	0.0736484	P08519;A0A087WWY0	P08519	Apolipoprotein(a)	LPA	ZFP_Plasma	sp|P08519|APOA_HUMAN Apolipoprotein(a) OS=Homo sapiens OX=9606 GN=LPA PE=1 SV=1
24.1218	24.0996	24.2423	22.3717	23.0544	23.0083	23.4038	24.519	23.263	23.2219	22.9218	23.6206	0.0248952	0.0736484	A0A0B4J231;B9A064;A0A5H1ZRQ4;P0CG04	A0A0B4J231;B9A064;A0A5H1ZRQ4;P0CG04	Immunoglobulin lambda-like polypeptide 5;Ig lambda-1 chain C regions	IGLL5;IGLC1	Plasma_NUAP	tr|A0A0B4J231|A0A0B4J231_HUMAN Isoform of B9A064, Immunoglobulin lambda-like polypeptide 5 OS=Homo sapiens OX=9606 GN=IGLL5 PE=1 SV=1;sp|B9A064|IGLL5_HUMAN Immunoglobulin lambda-like polypeptide 5 OS=Homo sapiens OX=9606 GN=IGLL5 PE=2 SV=2;tr|A0A5H1ZRQ4|A0
20.8324	21.4458	21.7052	19.7292	19.5864	NaN	23.1567	22.4866	21.2566	22.0291	21.2274	20.5252	0.0264246	0.0765774	E9PIT3;P00734;CON__P00735;C9JV37	E9PIT3;P00734;CON__P00735	Prothrombin;Activation peptide fragment 1;Activation peptide fragment 2;Thrombin light chain;Thrombin heavy chain	F2	ZFP_NUAP	tr|E9PIT3|E9PIT3_HUMAN Isoform of P00734, Activation peptide fragment 1 OS=Homo sapiens OX=9606 GN=F2 PE=1 SV=1;sp|P00734|THRB_HUMAN Prothrombin OS=Homo sapiens OX=9606 GN=F2 PE=1 SV=2;
22.8719	21.8421	22.4633	24.9284	24.7795	24.9131	23.9204	24.2683	22.3527	23.278	24.5315	22.3899	0.0300366	0.085304	P02751-10;P02751-5;P02751-9;P02751-14;P02751-13;P02751-8;P02751-17;P02751-3;P02751-1;P02751-7;P02751;P02751-12;P02751-6;P02751-11;P02751-4;H0Y7Z1;P02751-16;P02751-2	P02751-10;P02751-5;P02751-9;P02751-14;P02751-13;P02751-8;P02751-17;P02751-3;P02751-1;P02751-7;P02751;P02751-12;P02751-6;P02751-11;P02751-4	Fibronectin;Anastellin;Ugl-Y1;Ugl-Y2;Ugl-Y3	FN1	NUAP_Plasma	sp|P02751-10|FINC-10_HUMAN Isoform of P02751, Isoform 10 of Fibronectin OS=Homo sapiens OX=9606 GN=FN1 PE=1 SV=5;sp|P02751-5|FINC-5_HUMAN Isoform of P02751, Isoform 5 of Fibronectin OS=Homo sapiens OX=9606 GN=FN1 PE=1 SV=5;sp|P02751-9|FINC-9_HUMAN Isoform
23.458	26.0718	25.9079	22.881	NaN	22.7277	23.6636	20.7714	20.7028	22.6522	21.4173	21.4381	0.0397258	0.110609	P02765;C9JV77	P02765;C9JV77	Alpha-2-HS-glycoprotein;Alpha-2-HS-glycoprotein chain A;Alpha-2-HS-glycoprotein chain B	AHSG	Plasma_ZFP	sp|P02765|FETUA_HUMAN Alpha-2-HS-glycoprotein OS=Homo sapiens OX=9606 GN=AHSG PE=1 SV=2;tr|C9JV77|C9JV77_HUMAN Isoform of P02765, Alpha-2-HS-glycoprotein OS=Homo sapiens OX=9606 GN=AHSG PE=1 SV=1
NaN	NaN	21.7176	23.7044	23.7037	23.2412	20.3028	NaN	21.6833	23.693	22.2351	21.8126	0.041236	0.112606	P00748	P00748	Coagulation factor XII;Coagulation factor XIIa heavy chain;Beta-factor XIIa part 1;Coagulation factor XIIa light chain	F12	Plasma_NUAP	sp|P00748|FA12_HUMAN Coagulation factor XII OS=Homo sapiens OX=9606 GN=F12 PE=1 SV=3
22.3868	21.7312	22.5158	NaN	NaN	20.5951	21.1813	20.7262	21.0716	22.0652	21.2967	20.831	0.0428794	0.114884	C9JA05;D6RHJ6;D6RD17;P01591	C9JA05;D6RHJ6;D6RD17;P01591	Immunoglobulin J chain	JCHAIN;IGJ	Plasma_NUAP	tr|C9JA05|C9JA05_HUMAN Isoform of P01591, Immunoglobulin J chain (Fragment) OS=Homo sapiens OX=9606 GN=JCHAIN PE=1 SV=1;tr|D6RHJ6|D6RHJ6_HUMAN Isoform of P01591, Immunoglobulin J chain (Fragment) OS=Homo sapiens OX=9606 GN=JCHAIN PE=1 SV=1;tr|D6RD17|D6RD17
NaN	NaN	NaN	22.0837	21.0849	22.1641	22.7779	22.2031	22.368	25.2788	23.2405	23.1167	0.0457492	0.120303	F5GY80;F5H7G1;P07358	F5GY80;F5H7G1;P07358	Complement component C8 beta chain	C8B	ZFP_Plasma	tr|F5GY80|F5GY80_HUMAN Isoform of P07358, Complement component 8 subunit beta OS=Homo sapiens OX=9606 GN=C8B PE=1 SV=1;tr|F5H7G1|F5H7G1_HUMAN Isoform of P07358, Complement component 8 subunit beta OS=Homo sapiens OX=9606 GN=C8B PE=1 SV=1;sp|P07358|CO8B_HUM
24.0121	23.8754	26.1076	NaN	21.8833	NaN	NaN	NaN	NaN	21.352	NaN	21.8375	0.0481368	0.12428	P19652	P19652	Alpha-1-acid glycoprotein 2	ORM2	Plasma_NUAP	sp|P19652|A1AG2_HUMAN Alpha-1-acid glycoprotein 2 OS=Homo sapiens OX=9606 GN=ORM2 PE=1 SV=2
22.8005	21.8037	21.4143	23.5504	23.3951	22.9398	23.0854	23.212	22.4053	22.3572	NaN	22.4435	0.0574284	0.145622	O14791;O14791-2;O14791-3;B1AH96;B1AH94;B1AH95;F8WCH3	O14791;O14791-2;O14791-3;B1AH96	Apolipoprotein L1	APOL1		sp|O14791|APOL1_HUMAN Apolipoprotein L1 OS=Homo sapiens OX=9606 GN=APOL1 PE=1 SV=5;sp|O14791-2|APOL1-2_HUMAN Isoform of O14791, Isoform 2 of Apolipoprotein L1 OS=Homo sapiens OX=9606 GN=APOL1 PE=1 SV=5;sp|O14791-3|APOL1-3_HUMAN Isoform of O14791, Isoform 3
NaN	NaN	14.2235	15.139	NaN	15.6087	NaN	18.1625	17.1041	NaN	17.326	16.5523	0.0599846	0.149435	E7END6;P04070;P04070-2	E7END6;P04070;P04070-2	Vitamin K-dependent protein C;Vitamin K-dependent protein C light chain;Vitamin K-dependent protein C heavy chain;Activation peptide	PROC		tr|E7END6|E7END6_HUMAN Isoform of P04070, Vitamin K-dependent protein C OS=Homo sapiens OX=9606 GN=PROC PE=1 SV=1;sp|P04070|PROC_HUMAN Vitamin K-dependent protein C OS=Homo sapiens OX=9606 GN=PROC PE=1 SV=1;sp|P04070-2|PROC-2_HUMAN Isoform of P04070, Isofo
22.0378	22.0813	19.9798	19.3174	NaN	18.3626	18.8527	NaN	NaN	NaN	19.265	18.8895	0.064743	0.158509	P02749;J3QLI0;J3KS17;J3QRN2	P02749;J3QLI0	Beta-2-glycoprotein 1	APOH		sp|P02749|APOH_HUMAN Beta-2-glycoprotein 1 OS=Homo sapiens OX=9606 GN=APOH PE=1 SV=3;tr|J3QLI0|J3QLI0_HUMAN Isoform of P02749, Beta-2-glycoprotein 1 (Fragment) OS=Homo sapiens OX=9606 GN=APOH PE=1 SV=1
23.6631	23.7028	22.9351	21.5617	23.2151	22.7196	21.5691	22.5885	22.1792	22.4069	22.3185	22.075	0.0691317	0.166385	P10909-4;P10909-6;P10909;P10909-5;P10909-2;P10909-3;H0YAS8;H0YC35;E5RG36;E5RGB0;E5RH61;E5RJZ5;E7ERK6;E7ETB4;H0YLK8	P10909-4;P10909-6;P10909;P10909-5;P10909-2;P10909-3;H0YAS8	Clusterin;Clusterin beta chain;Clusterin alpha chain	CLU		sp|P10909-4|CLUS-4_HUMAN Isoform of P10909, Isoform 4 of Clusterin OS=Homo sapiens OX=9606 GN=CLU PE=1 SV=1;sp|P10909-6|CLUS-6_HUMAN Isoform of P10909, Isoform 6 of Clusterin OS=Homo sapiens OX=9606 GN=CLU PE=1 SV=1;sp|P10909|CLUS_HUMAN Clusterin OS=Homo s
25.8961	24.2696	25.3204	25.2161	24.6553	24.1636	25.1683	25.3011	25.2572	26.8811	26.0107	25.6361	0.0724607	0.17149	P01871;P01871-2	P01871;P01871-2	Ig mu chain C region	IGHM		sp|P01871|IGHM_HUMAN Immunoglobulin heavy constant mu OS=Homo sapiens OX=9606 GN=IGHM PE=1 SV=4;sp|P01871-2|IGHM-2_HUMAN Isoform of P01871, Isoform 2 of Immunoglobulin heavy constant mu OS=Homo sapiens OX=9606 GN=IGHM PE=1 SV=4
19.8687	20.1423	NaN	NaN	19.75	NaN	21.2046	21.3321	21.4811	NaN	21.4401	23.6694	0.0797876	0.185735	A0A7P0T8E9;A0A7P0TAM9;A0A7P0T995;H0YG44;A0A7P0Z4J2;H7BZB4;A0A7P0Z4H1;A0A7P0T883;A0A7P0Z475;A0A7P0T8V8;Q4AC94-2;Q4AC94-4;Q4AC94-1;Q4AC94-3;Q4AC94	A0A7P0T8E9;A0A7P0TAM9;A0A7P0T995;H0YG44;A0A7P0Z4J2;H7BZB4;A0A7P0Z4H1;A0A7P0T883;A0A7P0Z475;A0A7P0T8V8;Q4AC94-2;Q4AC94-4;Q4AC94-1;Q4AC94-3;Q4AC94	C2 domain-containing protein 3	C2CD3		tr|A0A7P0T8E9|A0A7P0T8E9_HUMAN Isoform of Q4AC94, C2 domain-containing protein 3 OS=Homo sapiens OX=9606 GN=C2CD3 PE=1 SV=1;tr|A0A7P0TAM9|A0A7P0TAM9_HUMAN Isoform of Q4AC94, C2 domain-containing protein 3 OS=Homo sapiens OX=9606 GN=C2CD3 PE=1 SV=1;tr|A0A7P
NaN	NaN	NaN	25.0556	24.8707	25.3748	24.8696	24.2962	24.8054	24.7795	24.2492	24.3924	0.0818671	0.187502	A0A0J9YWU9;P0DP08;P0DP06;A0A0C4DH41;P01825;P06331;P01824	A0A0J9YWU9;P0DP08;P0DP06;A0A0C4DH41;P01825;P06331;P01824	Ig heavy chain V-II region NEWM;Ig heavy chain V-II region ARH-77;Ig heavy chain V-II region WAH	IGHV4-61		tr|A0A0J9YWU9|A0A0J9YWU9_HUMAN Ig-like domain-containing protein (Fragment) OS=Homo sapiens OX=9606 PE=1 SV=1;sp|P0DP08|HVD82_HUMAN Immunoglobulin heavy variable 4-38-2 OS=Homo sapiens OX=9606 GN=IGHV4-38-2 PE=3 SV=1;sp|P0DP06|HVD34_HUMAN Immunoglobulin he
28.6628	27.2682	27.098	28.0952	28.5105	27.1229	28.372	28.2845	28.7582	29.6019	28.7968	28.827	0.0898185	0.202448	A0A0A0MS08;P01857;A0A0A0MS07	A0A0A0MS08;P01857;A0A0A0MS07	Ig gamma-1 chain C region	IGHG1		tr|A0A0A0MS08|A0A0A0MS08_HUMAN Isoform of P01857, Immunoglobulin heavy constant gamma 1 (Fragment) OS=Homo sapiens OX=9606 GN=IGHG1 PE=1 SV=1;sp|P01857|IGHG1_HUMAN Immunoglobulin heavy constant gamma 1 OS=Homo sapiens OX=9606 GN=IGHG1 PE=1 SV=1;tr|A0A0A0MS
NaN	NaN	16.9174	19.1919	19.5634	NaN	20.5616	NaN	20.043	20.1307	NaN	NaN	0.101246	0.223255	F5H2Z5;H0YF87;H0YFJ9;F5GWF3;Q9NZP8	F5H2Z5;H0YF87;H0YFJ9;F5GWF3;Q9NZP8	Complement C1r subcomponent-like protein	C1RL		tr|F5H2Z5|F5H2Z5_HUMAN Isoform of Q9NZP8, Complement C1r subcomponent-like protein OS=Homo sapiens OX=9606 GN=C1RL PE=1 SV=1;tr|H0YF87|H0YF87_HUMAN Isoform of Q9NZP8, Complement C1r subcomponent-like protein (Fragment) OS=Homo sapiens OX=9606 GN=C1RL PE=1
21.1797	22.0597	21.7362	21.5159	22.1117	21.8605	21.0085	21.6295	20.2462	20.5203	21.3526	19.3329	0.102194	0.223255	CON__Q32PJ2	CON__Q32PJ2
NaN	NaN	NaN	23.6016	21.019	21.268	20.6821	20.1561	19.8878	NaN	NaN	NaN	0.114434	0.246206	CON__P02676	CON__P02676
21.1686	NaN	19.4222	NaN	20.6849	NaN	22.4236	21.4394	21.9379	21.0606	19.7295	20.9493	0.120152	0.25465	Q5T985;P19823;Q5T987;CON__Q9TRI1	Q5T985;P19823	Inter-alpha-trypsin inhibitor heavy chain H2	ITIH2		tr|Q5T985|Q5T985_HUMAN Isoform of P19823, Inter-alpha-trypsin inhibitor heavy chain H2 OS=Homo sapiens OX=9606 GN=ITIH2 PE=1 SV=1;sp|P19823|ITIH2_HUMAN Inter-alpha-trypsin inhibitor heavy chain H2 OS=Homo sapiens OX=9606 GN=ITIH2 PE=1 SV=2
20.7439	NaN	20.2625	NaN	NaN	NaN	21.4271	22.4237	NaN	NaN	NaN	21.8456	0.123903	0.258738	A0A0B4J2B5;A0A075B7F0;A0A0C4DH32;A0A0B4J1V1;P0DP04;A0A0B4J1X8;P01766;P01780;P01763;P01762;P01782	A0A0B4J2B5;A0A075B7F0;A0A0C4DH32;A0A0B4J1V1;P0DP04;A0A0B4J1X8;P01766;P01780;P01763;P01762;P01782	Ig heavy chain V-III region BRO;Ig heavy chain V-III region JON;Ig heavy chain V-III region WEA;Ig heavy chain V-III region TRO;Ig heavy chain V-III region DOB	IGHV3OR16-9;IGHV3OR16-10;IGHV3-20;IGHV3-21;IGHV3-43		tr|A0A0B4J2B5|A0A0B4J2B5_HUMAN Immunoglobulin heavy variable 3/OR16-9 (non-functional) (Fragment) OS=Homo sapiens OX=9606 GN=IGHV3OR16-9 PE=1 SV=1;tr|A0A075B7F0|A0A075B7F0_HUMAN Immunoglobulin heavy variable 3/OR16-10 (non-functional) (Fragment) OS=Homo sa
18.9549	19.0016	19.0276	18.064	17.7639	18.0509	18.212	18.3391	15.5183	17.4307	17.809	16.7833	0.128846	0.265161	P02760;S4R3Y4	P02760;S4R3Y4	Protein AMBP;Alpha-1-microglobulin;Inter-alpha-trypsin inhibitor light chain;Trypstatin	AMBP		sp|P02760|AMBP_HUMAN Protein AMBP OS=Homo sapiens OX=9606 GN=AMBP PE=1 SV=1;tr|S4R3Y4|S4R3Y4_HUMAN Isoform of P02760, Protein AMBP OS=Homo sapiens OX=9606 GN=AMBP PE=1 SV=1
NaN	NaN	NaN	21.8625	23.7106	22.1294	23.5163	24.4696	24.4453	22.3859	23.7475	24.234	0.158617	0.321766	E9PQI5;E9PQ80;E9PSI1;Q9BY43;Q9BY43-2	E9PQI5;E9PQ80;E9PSI1;Q9BY43;Q9BY43-2	Charged multivesicular body protein 4a	CHMP4A		tr|E9PQI5|E9PQI5_HUMAN Isoform of Q9BY43, Charged multivesicular body protein 4a OS=Homo sapiens OX=9606 GN=CHMP4A PE=1 SV=2;tr|E9PQ80|E9PQ80_HUMAN Isoform of Q9BY43, Charged multivesicular body protein 4a (Fragment) OS=Homo sapiens OX=9606 GN=CHMP4A PE=1
20.7648	19.7824	19.8134	20.3865	19.2596	19.8645	19.5661	19.0496	18.5977	19.9641	19.1712	19.9479	0.165392	0.330785	CON__P12763	CON__P12763
NaN	NaN	NaN	NaN	NaN	NaN	21.7506	22.1176	23.1428	23.0784	22.7357	23.6889	0.172816	0.340832	Q9NVR7-2;Q9NVR7	Q9NVR7-2;Q9NVR7	TBCC domain-containing protein 1	TBCCD1		sp|Q9NVR7-2|TBCC1-2_HUMAN Isoform of Q9NVR7, Isoform 2 of TBCC domain-containing protein 1 OS=Homo sapiens OX=9606 GN=TBCCD1 PE=4 SV=1;sp|Q9NVR7|TBCC1_HUMAN TBCC domain-containing protein 1 OS=Homo sapiens OX=9606 GN=TBCCD1 PE=1 SV=1
NaN	NaN	NaN	23.5072	24.6313	24.1492	24.3894	24.014	24.9562	24.5524	24.9126	25.4857	0.176492	0.343314	P03951;P03951-2;X6R3B1;D6RB32;H0Y596	P03951;P03951-2	Coagulation factor XI;Coagulation factor XIa heavy chain;Coagulation factor XIa light chain	F11		sp|P03951|FA11_HUMAN Coagulation factor XI OS=Homo sapiens OX=9606 GN=F11 PE=1 SV=1;sp|P03951-2|FA11-2_HUMAN Isoform of P03951, Isoform 2 of Coagulation factor XI OS=Homo sapiens OX=9606 GN=F11 PE=1 SV=1
28.0902	27.4277	28.0157	27.6599	27.9012	27.1088	28.4313	27.6848	28.2005	28.2329	28.9383	27.904	0.196982	0.377992	CON__P00761	CON__P00761
NaN	21.8899	21.7527	21.3665	NaN	NaN	NaN	NaN	NaN	21.6018	NaN	21.1181	0.207933	0.39249	P01042-2;P01042-3	P01042-2;P01042-3	Kininogen-1;Kininogen-1 heavy chain;T-kinin;Bradykinin;Lysyl-bradykinin;Kininogen-1 light chain;Low molecular weight growth-promoting factor	KNG1		sp|P01042-2|KNG1-2_HUMAN Isoform of P01042, Isoform LMW of Kininogen-1 OS=Homo sapiens OX=9606 GN=KNG1 PE=1 SV=2;sp|P01042-3|KNG1-3_HUMAN Isoform of P01042, Isoform 3 of Kininogen-1 OS=Homo sapiens OX=9606 GN=KNG1 PE=1 SV=2
23.5063	23.8155	24.2179	23.6662	22.8504	22.624	23.3059	22.7187	23.7158	23.1257	22.8434	23.5445	0.21013	0.39249	B0YIW2;P02656	B0YIW2;P02656	Apolipoprotein C-III	APOC3		tr|B0YIW2|B0YIW2_HUMAN Isoform of P02656, Apolipoprotein C-III OS=Homo sapiens OX=9606 GN=APOC3 PE=1 SV=1;sp|P02656|APOC3_HUMAN Apolipoprotein C-III OS=Homo sapiens OX=9606 GN=APOC3 PE=1 SV=1
21.594	NaN	NaN	NaN	NaN	NaN	22.4722	22.5726	23.0719	24.3822	22.913	23.0562	0.212829	0.39249	A0A087X232;P09871;F8WCZ6;H0Y5D1;F5H7T4;B5MCV4	A0A087X232;P09871;F8WCZ6	Complement C1s subcomponent;Complement C1s subcomponent heavy chain;Complement C1s subcomponent light chain	C1S		tr|A0A087X232|A0A087X232_HUMAN Isoform of P09871, Complement C1s subcomponent OS=Homo sapiens OX=9606 GN=C1S PE=1 SV=1;sp|P09871|C1S_HUMAN Complement C1s subcomponent OS=Homo sapiens OX=9606 GN=C1S PE=1 SV=1;tr|F8WCZ6|F8WCZ6_HUMAN Isoform of P09871, Comple
NaN	20.0764	18.1774	16.7742	17.9335	NaN	17.0597	NaN	17.5145	NaN	17.5894	NaN	0.226786	0.412867	P01714	P01714	Ig lambda chain V-III region SH			sp|P01714|LV319_HUMAN Immunoglobulin lambda variable 3-19 OS=Homo sapiens OX=9606 GN=IGLV3-19 PE=1 SV=2
NaN	NaN	NaN	NaN	NaN	NaN	21.4538	21.2106	20.4679	22.2212	21.8951	20.8053	0.315951	0.561457	A0A0C4DH67	A0A0C4DH67		IGKV1-8		sp|A0A0C4DH67|KV108_HUMAN Immunoglobulin kappa variable 1-8 OS=Homo sapiens OX=9606 GN=IGKV1-8 PE=3 SV=1
25.234	24.4746	24.8386	24.1269	23.0439	23.7639	24.7272	24.3675	24.4358	26.4592	23.132	25.7695	0.316314	0.561457	F5GXS0;A0A140TA49;A0A140TA44;A0A140TA32;A0A140TA29;A0A0G2JL54;A0A0G2JPR0;P0C0L5;P0C0L4-2;P0C0L4;A0A3B3ISA6;CON__P01030;CON__ENSEMBL:ENSBTAP00000007350;A0A3B3ISD7	F5GXS0;A0A140TA49;A0A140TA44;A0A140TA32;A0A140TA29;A0A0G2JL54;A0A0G2JPR0;P0C0L5;P0C0L4-2;P0C0L4;A0A3B3ISA6	Complement C4-B;Complement C4 beta chain;Complement C4-B alpha chain;C4a anaphylatoxin;C4b-B;C4d-B;Complement C4 gamma chain;Complement C4-A;Complement C4 beta chain;Complement C4-A alpha chain;C4a anaphylatoxin;C4b-A;C4d-A;Complement C4 gamma chain	C4B;C4A		tr|F5GXS0|F5GXS0_HUMAN Isoform of P0C0L5, C4a anaphylatoxin OS=Homo sapiens OX=9606 GN=C4B PE=1 SV=1;tr|A0A140TA49|A0A140TA49_HUMAN Isoform of P0C0L4, C4a anaphylatoxin OS=Homo sapiens OX=9606 GN=C4A PE=1 SV=1;tr|A0A140TA44|A0A140TA44_HUMAN Isoform of P0C0
22.9367	22.3224	21.5961	NaN	NaN	22.3241	21.8019	NaN	23.0374	20.5473	20.8364	22.51	0.348046	0.610155	CON__P02769	CON__P02769
NaN	NaN	NaN	NaN	17.5346	NaN	19.4946	19.4217	17.9393	19.4336	19.8114	NaN	0.390101	0.675541	A0A0J9YXX1;A0A0C4DH38	A0A0J9YXX1;A0A0C4DH38		IGHV5-51		sp|A0A0J9YXX1|HV5X1_HUMAN Immunoglobulin heavy variable 5-10-1 OS=Homo sapiens OX=9606 GN=IGHV5-10-1 PE=3 SV=1;sp|A0A0C4DH38|HV551_HUMAN Immunoglobulin heavy variable 5-51 OS=Homo sapiens OX=9606 GN=IGHV5-51 PE=3 SV=1
26.3404	25.1729	25.5942	26.057	26.277	25.9124	26.2736	26.1507	26.111	25.7645	26.2731	25.7586	0.411029	0.696055	P01024;M0QXZ3;CON__Q2UVX4;M0QYC8;M0R0Q9	P01024	Complement C3;Complement C3 beta chain;C3-beta-c;Complement C3 alpha chain;C3a anaphylatoxin;Acylation stimulating protein;Complement C3b alpha chain;Complement C3c alpha chain fragment 1;Complement C3dg fragment;Complement C3g fragment;Complement C3d fragment;Complement C3f fragment;Complement C3c alpha chain fragment 2	C3		sp|P01024|CO3_HUMAN Complement C3 OS=Homo sapiens OX=9606 GN=C3 PE=1 SV=2
22.4801	21.6379	22.2831	NaN	NaN	NaN	NaN	NaN	22.1614	22.2046	20.6802	22.0227	0.411751	0.696055	P01700;P01699	P01700;P01699	Ig lambda chain V-I region HA;Ig lambda chain V-I region VOR			sp|P01700|LV147_HUMAN Immunoglobulin lambda variable 1-47 OS=Homo sapiens OX=9606 GN=IGLV1-47 PE=1 SV=2;sp|P01699|LV144_HUMAN Immunoglobulin lambda variable 1-44 OS=Homo sapiens OX=9606 GN=IGLV1-44 PE=1 SV=2
22.2343	22.2464	21.3334	NaN	21.4935	NaN	22.3856	20.3626	19.5867	22.2735	22.4408	20.516	0.424412	0.703826	Q7Z5P9-2;Q7Z5P9	Q7Z5P9-2;Q7Z5P9	Mucin-19	MUC19		sp|Q7Z5P9-2|MUC19-2_HUMAN Isoform of Q7Z5P9, Isoform 2 of Mucin-19 OS=Homo sapiens OX=9606 GN=MUC19 PE=2 SV=3;sp|Q7Z5P9|MUC19_HUMAN Mucin-19 OS=Homo sapiens OX=9606 GN=MUC19 PE=1 SV=3
NaN	NaN	NaN	NaN	14.8504	NaN	15.0469	15.2541	14.9866	15.0109	17.8798	14.9648	0.426261	0.703826	A0A075B7D0	A0A075B7D0		IGHV1OR15-1		tr|A0A075B7D0|A0A075B7D0_HUMAN Immunoglobulin heavy variable 1/OR15-1 (non-functional) (Fragment) OS=Homo sapiens OX=9606 GN=IGHV1OR15-1 PE=1 SV=1
22.3376	22.3312	21.2308	NaN	21.1029	22.0392	22.5736	22.2039	22.3526	22.5207	20.6893	21.6078	0.482795	0.78801	P04004	P04004	Vitronectin;Vitronectin V65 subunit;Vitronectin V10 subunit;Somatomedin-B	VTN		sp|P04004|VTNC_HUMAN Vitronectin OS=Homo sapiens OX=9606 GN=VTN PE=1 SV=1
18.1889	NaN	NaN	18.2628	18.9058	NaN	18.6006	NaN	NaN	NaN	18.5116	17.9381	0.491903	0.790595	CON__P02533;P02533;F5GWP8;CON__Q04695;CON__Q9QWL7;Q04695;K7ESE1	CON__P02533;P02533;F5GWP8;CON__Q04695;CON__Q9QWL7;Q04695	Keratin, type I cytoskeletal 14;Keratin, type I cytoskeletal 17	KRT14;KRT17		;sp|P02533|K1C14_HUMAN Keratin, type I cytoskeletal 14 OS=Homo sapiens OX=9606 GN=KRT14 PE=1 SV=4;tr|F5GWP8|F5GWP8_HUMAN Isoform of Q04695, Keratin, type I cytoskeletal 17 OS=Homo sapiens OX=9606 GN=KRT17 PE=1 SV=2;;;sp|Q04695|K1C17_HUMAN Keratin, type I c
NaN	NaN	NaN	NaN	NaN	NaN	NaN	19.9043	20.5836	20.4097	20.4105	20.5073	0.495514	0.790595	A0A0C4DH25;P01619	A0A0C4DH25;P01619	Ig kappa chain V-III region B6	IGKV3D-20		sp|A0A0C4DH25|KVD20_HUMAN Immunoglobulin kappa variable 3D-20 OS=Homo sapiens OX=9606 GN=IGKV3D-20 PE=3 SV=1;sp|P01619|KV320_HUMAN Immunoglobulin kappa variable 3-20 OS=Homo sapiens OX=9606 GN=IGKV3-20 PE=1 SV=2
19.5645	16.5764	16.7998	19.8469	NaN	16.4594	15.4946	NaN	NaN	16.481	15.8886	NaN	0.53091	0.837657	CON__P34955	CON__P34955
NaN	22.2402	NaN	24.232	22.7554	25.2387	24.4259	24.4625	24.4359	24.0115	22.809	24.1062	0.536808	0.837657	K7ERI9;P02654;K7EKP1;K7EJI9;K7ELM9;K7EPF9	K7ERI9;P02654;K7EKP1;K7EJI9;K7ELM9;K7EPF9	Apolipoprotein C-I;Truncated apolipoprotein C-I	APOC1		tr|K7ERI9|K7ERI9_HUMAN Isoform of P02654, Apolipoprotein C-I (Fragment) OS=Homo sapiens OX=9606 GN=APOC1 PE=1 SV=1;sp|P02654|APOC1_HUMAN Apolipoprotein C-I OS=Homo sapiens OX=9606 GN=APOC1 PE=1 SV=1;tr|K7EKP1|K7EKP1_HUMAN Isoform of P02654, Apolipoprotein
24.9552	21.9088	24.3939	23.6448	25.0738	23.7438	24.5471	24.7273	24.5558	22.3885	24.1194	24.088	0.613163	0.946403	P04264;CON__P04264;CON__Q9R0H5;CON__Q6NXH9;CON__Q8BGZ7;CON__P50446;CON__Q6IFZ6;CON__Q7Z794;CON__Q922U2;CON__Q5XQN5;Q7Z794	P04264;CON__P04264	Keratin, type II cytoskeletal 1	KRT1		sp|P04264|K2C1_HUMAN Keratin, type II cytoskeletal 1 OS=Homo sapiens OX=9606 GN=KRT1 PE=1 SV=6;
16.234	NaN	NaN	NaN	24.9406	17.2206	16.8494	21.7522	17.5032	18.4534	19.8127	17.2644	0.639659	0.969999	CON__ENSEMBL:ENSBTAP00000038253;CON__Q3TTY5;Q01546;CON__P48668;CON__P04259;CON__P02538;CON__P19013;CON__P12035;CON__Q01546;P19013;P48668;P02538;P12035	CON__ENSEMBL:ENSBTAP00000038253
NaN	NaN	17.796	NaN	NaN	NaN	20.6948	NaN	18.5853	NaN	19.5179	18.4904	0.642112	0.969999	A0A0B4J1V0	A0A0B4J1V0		IGHV3-15		sp|A0A0B4J1V0|HV315_HUMAN Immunoglobulin heavy variable 3-15 OS=Homo sapiens OX=9606 GN=IGHV3-15 PE=3 SV=1
NaN	NaN	NaN	23.1769	21.6609	23.3998	22.7573	23.0084	23.9103	23.7331	22.2434	24.0394	0.682321	1	P55056;K7EMC3;K7ER74	P55056;K7EMC3;K7ER74	Apolipoprotein C-IV	APOC4;APOC4-APOC2		sp|P55056|APOC4_HUMAN Apolipoprotein C-IV OS=Homo sapiens OX=9606 GN=APOC4 PE=1 SV=1;tr|K7EMC3|K7EMC3_HUMAN Isoform of P55056, Apolipoprotein C-IV OS=Homo sapiens OX=9606 GN=APOC4 PE=3 SV=1;tr|K7ER74|K7ER74_HUMAN APOC4-APOC2 readthrough, Apolipoprotein C-I
NaN	NaN	NaN	22.1887	22.0581	22.5008	21.5811	22.0341	21.7655	20.8748	22.8121	22.4562	0.685737	1	P05154;G3V5I3;G3V482;G3V265;G3V264;G3V2M1	P05154	Plasma serine protease inhibitor	SERPINA5		sp|P05154|IPSP_HUMAN Plasma serine protease inhibitor OS=Homo sapiens OX=9606 GN=SERPINA5 PE=1 SV=3
NaN	20.4019	20.6502	19.1971	20.3091	NaN	19.8955	NaN	19.9275	20.956	18.8594	19.4426	0.710793	1	A0A4W8ZXM2;A0A0B4J1Y9;A0A0B4J1V6	A0A4W8ZXM2;A0A0B4J1Y9		IGHV3-72		tr|A0A4W8ZXM2|A0A4W8ZXM2_HUMAN Isoform of A0A0B4J1Y9, Immunoglobulin heavy variable 3-72 OS=Homo sapiens OX=9606 GN=IGHV3-72 PE=4 SV=1;sp|A0A0B4J1Y9|HV372_HUMAN Immunoglobulin heavy variable 3-72 OS=Homo sapiens OX=9606 GN=IGHV3-72 PE=3 SV=1
NaN	NaN	NaN	NaN	NaN	NaN	23.5724	21.3889	NaN	22.8763	21.9066	21.5213	0.720815	1	A0A0C4DH31;P23083	A0A0C4DH31;P23083	Ig heavy chain V-I region V35	IGHV1-18		sp|A0A0C4DH31|HV118_HUMAN Immunoglobulin heavy variable 1-18 OS=Homo sapiens OX=9606 GN=IGHV1-18 PE=3 SV=1;sp|P23083|HV102_HUMAN Immunoglobulin heavy variable 1-2 OS=Homo sapiens OX=9606 GN=IGHV1-2 PE=1 SV=2
18.5635	19.639	18.078	17.7881	20.2057	18.8657	18.6345	19.2414	20.7961	18.3263	21.0167	19.5576	0.73096	1	P06312	P06312	Ig kappa chain V-IV region	IGKV4-1		sp|P06312|KV401_HUMAN Immunoglobulin kappa variable 4-1 OS=Homo sapiens OX=9606 GN=IGKV4-1 PE=1 SV=1
NaN	NaN	NaN	NaN	NaN	NaN	21.9163	21.8014	22.117	22.1819	21.0182	22.2066	0.741078	1	A0A3B3IUA6;A0A3B3IRK9;G5E9F8;A0A3B3ISJ1;A0A0S2Z4L3;P07225	A0A3B3IUA6;A0A3B3IRK9;G5E9F8;A0A3B3ISJ1;A0A0S2Z4L3;P07225	Vitamin K-dependent protein S	PROS1		tr|A0A3B3IUA6|A0A3B3IUA6_HUMAN Isoform of P07225, Vitamin K-dependent protein S (Fragment) OS=Homo sapiens OX=9606 GN=PROS1 PE=1 SV=1;tr|A0A3B3IRK9|A0A3B3IRK9_HUMAN Isoform of P07225, Vitamin K-dependent protein S OS=Homo sapiens OX=9606 GN=PROS1 PE=1 SV=1
NaN	NaN	NaN	NaN	NaN	NaN	20.0643	21.2845	21.791	21.5729	20.4559	21.6631	0.788865	1	Q9UHG3-2;Q9UHG3;C9JGT6;C9JM55;C9K055;F8W8W4	Q9UHG3-2;Q9UHG3;C9JGT6;C9JM55;C9K055;F8W8W4	Prenylcysteine oxidase 1	PCYOX1		sp|Q9UHG3-2|PCYOX-2_HUMAN Isoform of Q9UHG3, Isoform 2 of Prenylcysteine oxidase 1 OS=Homo sapiens OX=9606 GN=PCYOX1 PE=1 SV=3;sp|Q9UHG3|PCYOX_HUMAN Prenylcysteine oxidase 1 OS=Homo sapiens OX=9606 GN=PCYOX1 PE=1 SV=3;tr|C9JGT6|C9JGT6_HUMAN Isoform of Q9UH
25.1602	21.6392	22.3509	22.3872	24.4411	22.9084	23.3772	24.8177	23.7085	21.8815	24.0505	23.6621	0.817833	1	CON__P13645;A0A1B0GVI3;P13645;CON__P02535-1;CON__A2A4G1;CON__Q148H6;CON__Q9Z2K1;CON__P08779;CON__Q3ZAW8;CON__Q7Z3Y7;Q7Z3Y7;P08779;K7EMD9;C9JM50;K7EPJ9;F8VZY9;CON__P08727;CON__P19001;CON__Q14525;K7ERE3;CON__Q9UE12;CON__Q15323;CON__A2A5Y0;CON__ENSEMBL:ENSP00000377550;CON__P05784;CON__Q92764;C4AM86;CON__P08730-1;CON__Q14532;CON__Q7Z3Z0;CON__Q6IFX2;CON__A2AB72;CON__Q497I4;CON__P19012;CON__O76015;CON_…	CON__P13645;A0A1B0GVI3;P13645	Keratin, type I cytoskeletal 10	KRT10		;tr|A0A1B0GVI3|A0A1B0GVI3_HUMAN Isoform of P13645, Keratin, type I cytoskeletal 10 OS=Homo sapiens OX=9606 GN=KRT10 PE=1 SV=2;sp|P13645|K1C10_HUMAN Keratin, type I cytoskeletal 10 OS=Homo sapiens OX=9606 GN=KRT10 PE=1 SV=6
19.643	18.0028	NaN	20.0105	20.8446	17.3846	NaN	NaN	NaN	19.1889	NaN	19.3811	0.898197	1	I3L3I0;I3L1U9;A0A2R8Y793;A0A6Q8PFE4;E7EVS6;I3L4N8;P63261;P60709;C9JTX5;C9JUM1;C9JZR7;F8WB63;B8ZZJ2;G5E9R0;K7EM38;C9JFL5;F6UVQ4;F6QUT6;A0A6Q8PH58;A0A2R8YEA7;I3L3R2;A0A2R8YGF8;J3KT65;A0A804HKV3;A6NL76;A0A804GS07;P63267;P68133;P68032;P62736	I3L3I0;I3L1U9;A0A2R8Y793;A0A6Q8PFE4;E7EVS6;I3L4N8;P63261;P60709;C9JTX5;C9JUM1;C9JZR7;F8WB63;B8ZZJ2;G5E9R0;K7EM38;C9JFL5;F6UVQ4;F6QUT6;A0A6Q8PH58;A0A2R8YEA7;I3L3R2;A0A2R8YGF8;J3KT65;A0A804HKV3;A6NL76;A0A804GS07;P63267;P68133;P68032;P62736	Actin, cytoplasmic 2;Actin, cytoplasmic 2, N-terminally processed;Actin, cytoplasmic 1;Actin, cytoplasmic 1, N-terminally processed;Actin, gamma-enteric smooth muscle;Actin, alpha skeletal muscle;Actin, alpha cardiac muscle 1;Actin, aortic smooth muscle	ACTG1;ACTB;ACTG2;ACTA2;ACTA1;ACTC1		tr|I3L3I0|I3L3I0_HUMAN Isoform of P63261, Actin, cytoplasmic 2 (Fragment) OS=Homo sapiens OX=9606 GN=ACTG1 PE=1 SV=1;tr|I3L1U9|I3L1U9_HUMAN Isoform of P63261, Actin, cytoplasmic 2 (Fragment) OS=Homo sapiens OX=9606 GN=ACTG1 PE=1 SV=1;tr|A0A2R8Y793|A0A2R8Y7
NaN	NaN	20.561	18.3753	20.3385	20.0713	19.0904	21.444	19.4262	NaN	20.5866	19.1673	0.913061	1	CON__P35527;P35527;K7EQQ3	CON__P35527;P35527	Keratin, type I cytoskeletal 9	KRT9		;sp|P35527|K1C9_HUMAN Keratin, type I cytoskeletal 9 OS=Homo sapiens OX=9606 GN=KRT9 PE=1 SV=3
17.3378	NaN	NaN	NaN	19.8855	17.5826	18.1585	18.9638	18.2667	NaN	19.5706	17.5007	0.966102	1	CON__P35908;P35908	CON__P35908;P35908	Keratin, type II cytoskeletal 2 epidermal	KRT2		;sp|P35908|K22E_HUMAN Keratin, type II cytoskeletal 2 epidermal OS=Homo sapiens OX=9606 GN=KRT2 PE=1 SV=2
20.7529	NaN	NaN	21.7306	21.7716	21.6231	22.9639	22.4947	20.2186	21.695	22.0464	NaN	0.967611	1	P00747;CON__P06868;Q5TEH5;A6PVI2;Q02325	P00747	Plasminogen;Plasmin heavy chain A;Activation peptide;Angiostatin;Plasmin heavy chain A, short form;Plasmin light chain B	PLG		sp|P00747|PLMN_HUMAN Plasminogen OS=Homo sapiens OX=9606 GN=PLG PE=1 SV=2
NaN	NaN	NaN	19.3654	NaN	19.7364	21.6552	NaN	NaN	NaN	NaN	NaN	1	1	A0A075B6K4;P01717	A0A075B6K4;P01717	Ig lambda chain V-IV region Hil	IGLV3-10		sp|A0A075B6K4|LV310_HUMAN Immunoglobulin lambda variable 3-10 OS=Homo sapiens OX=9606 GN=IGLV3-10 PE=3 SV=2;sp|P01717|LV325_HUMAN Immunoglobulin lambda variable 3-25 OS=Homo sapiens OX=9606 GN=IGLV3-25 PE=1 SV=2
NaN	NaN	NaN	NaN	NaN	NaN	NaN	NaN	18.9791	19.2962	20.0111	NaN	1	1	A0A075B6Q5	A0A075B6Q5		IGHV3-64		sp|A0A075B6Q5|HV364_HUMAN Immunoglobulin heavy variable 3-64 OS=Homo sapiens OX=9606 GN=IGHV3-64 PE=3 SV=1
NaN	NaN	NaN	NaN	NaN	NaN	NaN	NaN	NaN	19.1971	NaN	NaN	1	1	A0A087WSY6	A0A087WSY6		IGKV3D-15		sp|A0A087WSY6|KVD15_HUMAN Immunoglobulin kappa variable 3D-15 OS=Homo sapiens OX=9606 GN=IGKV3D-15 PE=3 SV=6
19.4148	NaN	NaN	NaN	NaN	NaN	NaN	NaN	19.902	19.8157	19.4312	NaN	1	1	C9JWJ3;C9IZL6;C9J0E2;C9J480;A0A087WXB8;Q9Y274-2;Q9Y274	C9JWJ3;C9IZL6;C9J0E2;C9J480;A0A087WXB8;Q9Y274-2;Q9Y274	Type 2 lactosamine alpha-2,3-sialyltransferase	ST3GAL6		tr|C9JWJ3|C9JWJ3_HUMAN Isoform of Q9Y274, Type 2 lactosamine alpha-2,3-sialyltransferase (Fragment) OS=Homo sapiens OX=9606 GN=ST3GAL6 PE=1 SV=1;tr|C9IZL6|C9IZL6_HUMAN Isoform of Q9Y274, Type 2 lactosamine alpha-2,3-sialyltransferase (Fragment) OS=Homo sap
NaN	NaN	NaN	NaN	NaN	NaN	NaN	NaN	16.8101	17.6806	NaN	NaN	1	1	A0A0A0MS14	A0A0A0MS14		IGHV1-45		sp|A0A0A0MS14|HV145_HUMAN Immunoglobulin heavy variable 1-45 OS=Homo sapiens OX=9606 GN=IGHV1-45 PE=3 SV=1
21.1809	NaN	NaN	NaN	NaN	NaN	NaN	NaN	NaN	19.2738	20.0737	NaN	1	1	A0A0B4J1X5;A0A075B7E8;A0A0C4DH42;P01767	A0A0B4J1X5;A0A075B7E8		IGHV3-74;IGHV3OR16-13		sp|A0A0B4J1X5|HV374_HUMAN Immunoglobulin heavy variable 3-74 OS=Homo sapiens OX=9606 GN=IGHV3-74 PE=3 SV=1;tr|A0A075B7E8|A0A075B7E8_HUMAN Immunoglobulin heavy variable 3/OR16-13 (non-functional) (Fragment) OS=Homo sapiens OX=9606 GN=IGHV3OR16-13 PE=1 SV=1
NaN	NaN	NaN	16.6966	NaN	NaN	NaN	NaN	NaN	14.2877	NaN	NaN	1	1	A0A2R8Y7C0;P69905;G3V1N2	A0A2R8Y7C0;P69905;G3V1N2	Hemoglobin subunit alpha	HBA1;HBA2		tr|A0A2R8Y7C0|A0A2R8Y7C0_HUMAN Isoform of P69905, Hemoglobin subunit alpha (Fragment) OS=Homo sapiens OX=9606 GN=HBA2 PE=1 SV=1;sp|P69905|HBA_HUMAN Hemoglobin subunit alpha OS=Homo sapiens OX=9606 GN=HBA2 PE=1 SV=2;tr|G3V1N2|G3V1N2_HUMAN Isoform of P69905,
21.061	19.6809	NaN	19.5098	NaN	NaN	NaN	NaN	NaN	NaN	NaN	NaN	1	1	CON__P01966	CON__P01966
17.9004	NaN	NaN	16.4905	NaN	NaN	15.584	NaN	NaN	15.7095	NaN	NaN	1	1	CON__P15497	CON__P15497
17.3593	NaN	NaN	16.6026	NaN	NaN	14.6971	NaN	NaN	15.6707	NaN	NaN	1	1	CON__Q3SX09;CON__P02070;A0A2R8Y7X9;P69892;P69891;P02100	CON__Q3SX09;CON__P02070				;
NaN	NaN	NaN	NaN	NaN	NaN	NaN	NaN	NaN	23.93	21.8837	21.4085	1	1	E9PAQ1;P27918;C9J7V5	E9PAQ1;P27918;C9J7V5	Properdin	CFP		tr|E9PAQ1|E9PAQ1_HUMAN Isoform of P27918, Properdin OS=Homo sapiens OX=9606 GN=CFP PE=1 SV=1;sp|P27918|PROP_HUMAN Properdin OS=Homo sapiens OX=9606 GN=CFP PE=1 SV=2;tr|C9J7V5|C9J7V5_HUMAN Isoform of P27918, Properdin (Fragment) OS=Homo sapiens OX=9606 GN=C
NaN	NaN	NaN	NaN	NaN	NaN	15.3907	15.4836	NaN	NaN	NaN	NaN	1	1	G3XAP6;P49747-2;P49747	G3XAP6;P49747-2;P49747	Cartilage oligomeric matrix protein	COMP		tr|G3XAP6|G3XAP6_HUMAN Isoform of P49747, Cartilage oligomeric matrix protein OS=Homo sapiens OX=9606 GN=COMP PE=1 SV=1;sp|P49747-2|COMP-2_HUMAN Isoform of P49747, Isoform 2 of Cartilage oligomeric matrix protein OS=Homo sapiens OX=9606 GN=COMP PE=1 SV=2;s
NaN	NaN	NaN	NaN	NaN	NaN	NaN	19.8891	NaN	NaN	NaN	20.2899	1	1	O00391-2;O00391	O00391-2;O00391	Sulfhydryl oxidase 1	QSOX1		sp|O00391-2|QSOX1-2_HUMAN Isoform of O00391, Isoform 2 of Sulfhydryl oxidase 1 OS=Homo sapiens OX=9606 GN=QSOX1 PE=1 SV=3;sp|O00391|QSOX1_HUMAN Sulfhydryl oxidase 1 OS=Homo sapiens OX=9606 GN=QSOX1 PE=1 SV=3
26.4651	26.4721	24.9434	22.3001	NaN	NaN	23.1832	NaN	NaN	NaN	22.9474	NaN	1	1	P01011;G3V3A0;G3V595;P01011-2	P01011;G3V3A0;G3V595	Alpha-1-antichymotrypsin;Alpha-1-antichymotrypsin His-Pro-less	SERPINA3		sp|P01011|AACT_HUMAN Alpha-1-antichymotrypsin OS=Homo sapiens OX=9606 GN=SERPINA3 PE=1 SV=2;tr|G3V3A0|G3V3A0_HUMAN Isoform of P01011, Alpha-1-antichymotrypsin OS=Homo sapiens OX=9606 GN=SERPINA3 PE=1 SV=1;tr|G3V595|G3V595_HUMAN Isoform of P01011, Alpha-1-a
23.4292	22.9014	22.7121	NaN	NaN	NaN	NaN	NaN	NaN	NaN	NaN	NaN	1	1	P02750	P02750	Leucine-rich alpha-2-glycoprotein	LRG1		sp|P02750|A2GL_HUMAN Leucine-rich alpha-2-glycoprotein OS=Homo sapiens OX=9606 GN=LRG1 PE=1 SV=2
24.1349	25.1803	24.702	NaN	NaN	NaN	NaN	NaN	NaN	NaN	NaN	NaN	1	1	P02763	P02763	Alpha-1-acid glycoprotein 1	ORM1		sp|P02763|A1AG1_HUMAN Alpha-1-acid glycoprotein 1 OS=Homo sapiens OX=9606 GN=ORM1 PE=1 SV=1
23.856	24.546	24.0893	NaN	NaN	NaN	NaN	NaN	NaN	NaN	NaN	NaN	1	1	P02790;Q9BS19	P02790	Hemopexin	HPX		sp|P02790|HEMO_HUMAN Hemopexin OS=Homo sapiens OX=9606 GN=HPX PE=1 SV=2
22.8532	23.3117	23.3009	NaN	NaN	22.8303	NaN	NaN	NaN	NaN	NaN	NaN	1	1	P04217;P04217-2;M0R009;CON__Q2KJF1	P04217;P04217-2	Alpha-1B-glycoprotein	A1BG		sp|P04217|A1BG_HUMAN Alpha-1B-glycoprotein OS=Homo sapiens OX=9606 GN=A1BG PE=1 SV=4;sp|P04217-2|A1BG-2_HUMAN Isoform of P04217, Isoform 2 of Alpha-1B-glycoprotein OS=Homo sapiens OX=9606 GN=A1BG PE=1 SV=4
NaN	18.9757	NaN	NaN	NaN	NaN	NaN	NaN	NaN	20.8672	NaN	NaN	1	1	P05546	P05546	Heparin cofactor 2	SERPIND1		sp|P05546|HEP2_HUMAN Heparin cofactor 2 OS=Homo sapiens OX=9606 GN=SERPIND1 PE=1 SV=3
NaN	NaN	NaN	NaN	NaN	NaN	NaN	NaN	NaN	21.2414	NaN	21.2704	1	1	P07360;A0A3B3ITK5	P07360;A0A3B3ITK5	Complement component C8 gamma chain	C8G		sp|P07360|CO8G_HUMAN Complement component C8 gamma chain OS=Homo sapiens OX=9606 GN=C8G PE=1 SV=3;tr|A0A3B3ITK5|A0A3B3ITK5_HUMAN Isoform of P07360, Complement component C8 gamma chain (Fragment) OS=Homo sapiens OX=9606 GN=C8G PE=1 SV=1
19.6148	21.7884	20.3685	NaN	NaN	NaN	NaN	NaN	NaN	NaN	NaN	NaN	1	1	P08185;G3V4V7;G3V350	P08185	Corticosteroid-binding globulin	SERPINA6		sp|P08185|CBG_HUMAN Corticosteroid-binding globulin OS=Homo sapiens OX=9606 GN=SERPINA6 PE=1 SV=1
NaN	21.6115	NaN	NaN	NaN	NaN	NaN	NaN	NaN	NaN	NaN	NaN	1	1	P08603	P08603	Complement factor H	CFH		sp|P08603|CFAH_HUMAN Complement factor H OS=Homo sapiens OX=9606 GN=CFH PE=1 SV=4
NaN	16.4141	NaN	NaN	NaN	NaN	19.2395	NaN	NaN	NaN	NaN	NaN	1	1	P15814	P15814	Immunoglobulin lambda-like polypeptide 1	IGLL1		sp|P15814|IGLL1_HUMAN Immunoglobulin lambda-like polypeptide 1 OS=Homo sapiens OX=9606 GN=IGLL1 PE=1 SV=1
19.9054	19.866	NaN	NaN	NaN	NaN	NaN	NaN	NaN	NaN	NaN	NaN	1	1	P19827;F8WAS2;CON__Q0VCM5;P19827-2	P19827;F8WAS2;CON__Q0VCM5;P19827-2	Inter-alpha-trypsin inhibitor heavy chain H1	ITIH1		sp|P19827|ITIH1_HUMAN Inter-alpha-trypsin inhibitor heavy chain H1 OS=Homo sapiens OX=9606 GN=ITIH1 PE=1 SV=3;tr|F8WAS2|F8WAS2_HUMAN Isoform of P19827, Inter-alpha-trypsin inhibitor heavy chain H1 OS=Homo sapiens OX=9606 GN=ITIH1 PE=1 SV=1;;sp|P19827-2|ITI
22.0941	21.4562	18.9895	20.3092	NaN	NaN	NaN	NaN	17.7458	NaN	NaN	NaN	1	1	P22792	P22792	Carboxypeptidase N subunit 2	CPN2		sp|P22792|CPN2_HUMAN Carboxypeptidase N subunit 2 OS=Homo sapiens OX=9606 GN=CPN2 PE=1 SV=3
22.7414	23.4819	22.6417	NaN	NaN	NaN	NaN	NaN	NaN	NaN	NaN	NaN	1	1	P25311;C9JEV0;H7BZJ8	P25311;C9JEV0	Zinc-alpha-2-glycoprotein	AZGP1		sp|P25311|ZA2G_HUMAN Zinc-alpha-2-glycoprotein OS=Homo sapiens OX=9606 GN=AZGP1 PE=1 SV=2;tr|C9JEV0|C9JEV0_HUMAN Isoform of P25311, Zinc-alpha-2-glycoprotein OS=Homo sapiens OX=9606 GN=AZGP1 PE=1 SV=1
NaN	20.1331	19.1349	NaN	NaN	NaN	NaN	NaN	NaN	NaN	NaN	NaN	1	1	P36955;I3L107;I3L4Z0;I3L4N7	P36955;I3L107;I3L4Z0;I3L4N7	Pigment epithelium-derived factor	SERPINF1		sp|P36955|PEDF_HUMAN Pigment epithelium-derived factor OS=Homo sapiens OX=9606 GN=SERPINF1 PE=1 SV=4;tr|I3L107|I3L107_HUMAN Isoform of P36955, Pigment epithelium-derived factor (Fragment) OS=Homo sapiens OX=9606 GN=SERPINF1 PE=1 SV=1;tr|I3L4Z0|I3L4Z0_HUMAN
22.5747	22.2934	22.5051	NaN	NaN	NaN	NaN	NaN	NaN	NaN	NaN	NaN	1	1	P43652;CON__REFSEQ:XP_585019	P43652	Afamin	AFM		sp|P43652|AFAM_HUMAN Afamin OS=Homo sapiens OX=9606 GN=AFM PE=1 SV=1
NaN	20.4393	NaN	NaN	NaN	NaN	NaN	NaN	NaN	NaN	NaN	NaN	1	1	P51884;CON__Q05443	P51884;CON__Q05443	Lumican	LUM		sp|P51884|LUM_HUMAN Lumican OS=Homo sapiens OX=9606 GN=LUM PE=1 SV=2;
23.6828	24.0599	23.4352	NaN	NaN	NaN	NaN	NaN	NaN	NaN	NaN	NaN	1	1	P68871;A0A2R8Y7R2;P02042;F8W6P5;E9PFT6;E9PEW8	P68871;A0A2R8Y7R2;P02042;F8W6P5;E9PFT6	Hemoglobin subunit beta;LVV-hemorphin-7;Spinorphin;Hemoglobin subunit delta	HBB;HBD		sp|P68871|HBB_HUMAN Hemoglobin subunit beta OS=Homo sapiens OX=9606 GN=HBB PE=1 SV=2;tr|A0A2R8Y7R2|A0A2R8Y7R2_HUMAN Isoform of P68871, Hemoglobin subunit beta OS=Homo sapiens OX=9606 GN=HBB PE=1 SV=1;sp|P02042|HBD_HUMAN Hemoglobin subunit delta OS=Homo sap
NaN	NaN	NaN	NaN	NaN	NaN	24.1798	24.3322	24.4878	20.7101	NaN	NaN	1	1	Q14520-2;Q14520	Q14520-2;Q14520	Hyaluronan-binding protein 2;Hyaluronan-binding protein 2 50 kDa heavy chain;Hyaluronan-binding protein 2 50 kDa heavy chain alternate form;Hyaluronan-binding protein 2 27 kDa light chain;Hyaluronan-binding protein 2 27 kDa light chain alternate form	HABP2		sp|Q14520-2|HABP2-2_HUMAN Isoform of Q14520, Isoform 2 of Hyaluronan-binding protein 2 OS=Homo sapiens OX=9606 GN=HABP2 PE=2 SV=1;sp|Q14520|HABP2_HUMAN Hyaluronan-binding protein 2 OS=Homo sapiens OX=9606 GN=HABP2 PE=1 SV=1
NaN	NaN	NaN	NaN	NaN	NaN	NaN	NaN	NaN	NaN	NaN	18.9132	1	1	Q16777;Q6FI13	Q16777;Q6FI13	Histone H2A type 2-C;Histone H2A type 2-A	HIST2H2AC;HIST2H2AA3		sp|Q16777|H2A2C_HUMAN Histone H2A type 2-C OS=Homo sapiens OX=9606 GN=H2AC20 PE=1 SV=4;sp|Q6FI13|H2A2A_HUMAN Histone H2A type 2-A OS=Homo sapiens OX=9606 GN=H2AC19 PE=1 SV=3
NaN	NaN	NaN	NaN	NaN	NaN	NaN	NaN	17.7473	NaN	NaN	NaN	1	1	Q8N5G2-2;Q8N5G2-3;Q8N5G2	Q8N5G2-2;Q8N5G2-3;Q8N5G2	Macoilin	TMEM57		sp|Q8N5G2-2|MACOI-2_HUMAN Isoform of Q8N5G2, Isoform 2 of Macoilin OS=Homo sapiens OX=9606 GN=MACO1 PE=1 SV=1;sp|Q8N5G2-3|MACOI-3_HUMAN Isoform of Q8N5G2, Isoform 3 of Macoilin OS=Homo sapiens OX=9606 GN=MACO1 PE=1 SV=1;sp|Q8N5G2|MACOI_HUMAN Macoilin OS=Ho
NaN	NaN	NaN	NaN	NaN	NaN	NaN	NaN	NaN	19.9268	NaN	19.9116	1	1	Q92954-5;Q92954-4;Q92954-3;Q92954-6;Q92954-2;Q92954	Q92954-5;Q92954-4;Q92954-3;Q92954-6;Q92954-2;Q92954	Proteoglycan 4;Proteoglycan 4 C-terminal part	PRG4		sp|Q92954-5|PRG4-5_HUMAN Isoform of Q92954, Isoform E of Proteoglycan 4 OS=Homo sapiens OX=9606 GN=PRG4 PE=1 SV=3;sp|Q92954-4|PRG4-4_HUMAN Isoform of Q92954, Isoform D of Proteoglycan 4 OS=Homo sapiens OX=9606 GN=PRG4 PE=1 SV=3;sp|Q92954-3|PRG4-3_HUMAN Iso
19.5038	18.9663	19.6681	NaN	NaN	NaN	NaN	NaN	NaN	NaN	NaN	NaN	1	1	Q96PD5;Q96PD5-2	Q96PD5;Q96PD5-2	N-acetylmuramoyl-L-alanine amidase	PGLYRP2		sp|Q96PD5|PGRP2_HUMAN N-acetylmuramoyl-L-alanine amidase OS=Homo sapiens OX=9606 GN=PGLYRP2 PE=1 SV=1;sp|Q96PD5-2|PGRP2-2_HUMAN Isoform of Q96PD5, Isoform 2 of N-acetylmuramoyl-L-alanine amidase OS=Homo sapiens OX=9606 GN=PGLYRP2 PE=1 SV=1
NaN	NaN	NaN	NaN	NaN	NaN	NaN	NaN	NaN	NaN	NaN	25.2538	1	1	Q9P225-3	Q9P225-3				sp|Q9P225-3|DYH2-3_HUMAN Isoform of Q9P225, Isoform 3 of Dynein axonemal heavy chain 2 OS=Homo sapiens OX=9606 GN=DNAH2 PE=1 SV=3

## Sheet: table7
Table 7. Venn diagramn
Proteins exclusives: Plasma		Proteins exclusives: ZFP		Proteins exclusives: ZWP			Proteins identified: Plasma		Proteins identified: NUAP		Proteins identified: ZFP		Proteins identified: ZWP
P02750		G3XAP6;P49747-2;P49747		A0A087WSY6			Protein IDs		Protein IDs		Protein IDs		Protein IDs
P02763		Q8N5G2-2;Q8N5G2-3;Q8N5G2		E9PAQ1;P27918;C9J7V5			A0A024R6I7;P01009;A0A0G2JRN3;P01009-2;P01009-3;G3V2B9;G3V544;G3V5R8;G3V387;A0A0B4J278		A0A024R6I7;P01009;A0A0G2JRN3;P01009-2;P01009-3;G3V2B9;G3V544;G3V5R8;G3V387;A0A0B4J278		A0A024R6I7;P01009;A0A0G2JRN3;P01009-2;P01009-3;G3V2B9;G3V544;G3V5R8;G3V387;A0A0B4J278		A0A024R6I7;P01009;A0A0G2JRN3;P01009-2;P01009-3;G3V2B9;G3V544;G3V5R8;G3V387;A0A0B4J278
P02790;Q9BS19				P07360;A0A3B3ITK5			A0A0C4DH90;A0A075B6H7;A0A0C4DH55;P01624		A0A0C4DH90;A0A075B6H7;A0A0C4DH55;P01624		A0A0C4DH90;A0A075B6H7;A0A0C4DH55;P01624		A0A0C4DH90;A0A075B6H7;A0A0C4DH55;P01624
P08185;G3V4V7;G3V350				Q16777;Q6FI13			A0A075B6K5;P80748		A0A075B6K4;P01717		A0A075B6K4;P01717		A0A075B6K5;P80748
P08603				Q92954-5;Q92954-4;Q92954-3;Q92954-6;Q92954-2;Q92954			A0A087WT59;P02766		A0A075B6K5;P80748		A0A075B6K5;P80748		A0A075B6Q5
P19827;F8WAS2;CON__Q0VCM5;P19827-2				Q9P225-3			C9JWJ3;C9IZL6;C9J0E2;C9J480;A0A087WXB8;Q9Y274-2;Q9Y274		A0A075B7D0		A0A075B6Q5		A0A075B7D0
P25311;C9JEV0;H7BZJ8							A0A087X232;P09871;F8WCZ6;H0Y5D1;F5H7T4;B5MCV4		A0A087WT59;P02766		A0A075B7D0		A0A087WSY6
P36955;I3L107;I3L4Z0;I3L4N7							A0A096LPE2;P35542		A0A096LPE2;P35542		C9JWJ3;C9IZL6;C9J0E2;C9J480;A0A087WXB8;Q9Y274-2;Q9Y274		C9JWJ3;C9IZL6;C9J0E2;C9J480;A0A087WXB8;Q9Y274-2;Q9Y274
P43652;CON__REFSEQ:XP_585019							A0A0A0MS08;P01857;A0A0A0MS07		A0A0A0MRJ7;P12259;CON__Q28107		A0A087X232;P09871;F8WCZ6;H0Y5D1;F5H7T4;B5MCV4		A0A087X232;P09871;F8WCZ6;H0Y5D1;F5H7T4;B5MCV4
P51884;CON__Q05443							A0A0B4J1V0		A0A0A0MS08;P01857;A0A0A0MS07		A0A096LPE2;P35542		A0A096LPE2;P35542
P68871;A0A2R8Y7R2;P02042;F8W6P5;E9PFT6;E9PEW8							A0A0B4J1X5;A0A075B7E8;A0A0C4DH42;P01767		A0A0B4J231;B9A064;A0A5H1ZRQ4;P0CG04		A0A0A0MRJ7;P12259;CON__Q28107		A0A0A0MRJ7;P12259;CON__Q28107
Q96PD5;Q96PD5-2							A0A0B4J231;B9A064;A0A5H1ZRQ4;P0CG04		A0A0J9YXX1;A0A0C4DH38		A0A0A0MS08;P01857;A0A0A0MS07		A0A0A0MS08;P01857;A0A0A0MS07
							A0A0B4J2B5;A0A075B7F0;A0A0C4DH32;A0A0B4J1V1;P0DP04;A0A0B4J1X8;P01766;P01780;P01763;P01762;P01782		A0A0J9YWU9;P0DP08;P0DP06;A0A0C4DH41;P01825;P06331;P01824		A0A0A0MS14		A0A0A0MS14
							F5GXS0;A0A140TA49;A0A140TA44;A0A140TA32;A0A140TA29;A0A0G2JL54;A0A0G2JPR0;P0C0L5;P0C0L4-2;P0C0L4;A0A3B3ISA6;CON__P01030;CON__ENSEMBL:ENSBTAP00000007350;A0A3B3ISD7		F5GXS0;A0A140TA49;A0A140TA44;A0A140TA32;A0A140TA29;A0A0G2JL54;A0A0G2JPR0;P0C0L5;P0C0L4-2;P0C0L4;A0A3B3ISA6;CON__P01030;CON__ENSEMBL:ENSBTAP00000007350;A0A3B3ISD7		A0A0B4J1V0		A0A0B4J1V0
							A0A0J9YY99;P0DP03;P01768;P0DP02;P01772;P01764		A0A0J9YY99;P0DP03;P01768;P0DP02;P01772;P01764		A0A0B4J231;B9A064;A0A5H1ZRQ4;P0CG04		A0A0B4J1X5;A0A075B7E8;A0A0C4DH42;P01767
							A0A182DWH7;P49908;A0A182DWH8		A0A182DWH7;P49908;A0A182DWH8		A0A0B4J2B5;A0A075B7F0;A0A0C4DH32;A0A0B4J1V1;P0DP04;A0A0B4J1X8;P01766;P01780;P01763;P01762;P01782		A0A0B4J231;B9A064;A0A5H1ZRQ4;P0CG04
							CON__P13645;A0A1B0GVI3;P13645;CON__P02535-1;CON__A2A4G1;CON__Q148H6;CON__Q9Z2K1;CON__P08779;CON__Q3ZAW8;CON__Q7Z3Y7;Q7Z3Y7;P08779;K7EMD9;C9JM50;K7EPJ9;F8VZY9;CON__P08727;CON__P19001;CON__Q14525;K7ERE3;CON__Q9UE12;CON__Q15323;CON__A2A5Y0;CON__ENSEMBL:ENSP00000377550;CON__P05784;CON__Q92764;C4AM86;CON__P08730-1;CON__Q14532;CON__Q7Z3Z0;CON__Q6IFX2;CON__A2AB72;CON__Q497I4;CON__P19012;CON__O76015;CON_…		CON__P13645;A0A1B0GVI3;P13645;CON__P02535-1;CON__A2A4G1;CON__Q148H6;CON__Q9Z2K1;CON__P08779;CON__Q3ZAW8;CON__Q7Z3Y7;Q7Z3Y7;P08779;K7EMD9;C9JM50;K7EPJ9;F8VZY9;CON__P08727;CON__P19001;CON__Q14525;K7ERE3;CON__Q9UE12;CON__Q15323;CON__A2A5Y0;CON__ENSEMBL:ENSP00000377550;CON__P05784;CON__Q92764;C4AM86;CON__P08730-1;CON__Q14532;CON__Q7Z3Z0;CON__Q6IFX2;CON__A2AB72;CON__Q497I4;CON__P19012;CON__O76015;CON_…		A0A0C4DH25;P01619		A0A0B4J2B5;A0A075B7F0;A0A0C4DH32;A0A0B4J1V1;P0DP04;A0A0B4J1X8;P01766;P01780;P01763;P01762;P01782
							A0A4W9A917;A0A286YES1;P01860		A0A4W9A917;A0A286YES1;P01860		A0A0C4DH31;P23083		A0A0C4DH25;P01619
							A0A286YEY1;P01876;A0A0G2JMB2;A0A286YEY5;P01877		A0A286YEY1;P01876;A0A0G2JMB2;A0A286YEY5;P01877		A0A0J9YXX1;A0A0C4DH38		A0A0C4DH31;P23083
							A0A286YEY4;P01859		A0A286YEY4;P01859		A0A0J9YWU9;P0DP08;P0DP06;A0A0C4DH41;P01825;P06331;P01824		A0A0J9YXX1;A0A0C4DH38
							I3L3I0;I3L1U9;A0A2R8Y793;A0A6Q8PFE4;E7EVS6;I3L4N8;P63261;P60709;C9JTX5;C9JUM1;C9JZR7;F8WB63;B8ZZJ2;G5E9R0;K7EM38;C9JFL5;F6UVQ4;F6QUT6;A0A6Q8PH58;A0A2R8YEA7;I3L3R2;A0A2R8YGF8;J3KT65;A0A804HKV3;A6NL76;A0A804GS07;P63267;P68133;P68032;P62736		I3L3I0;I3L1U9;A0A2R8Y793;A0A6Q8PFE4;E7EVS6;I3L4N8;P63261;P60709;C9JTX5;C9JUM1;C9JZR7;F8WB63;B8ZZJ2;G5E9R0;K7EM38;C9JFL5;F6UVQ4;F6QUT6;A0A6Q8PH58;A0A2R8YEA7;I3L3R2;A0A2R8YGF8;J3KT65;A0A804HKV3;A6NL76;A0A804GS07;P63267;P68133;P68032;P62736		A0A0C4DH67		A0A0J9YWU9;P0DP08;P0DP06;A0A0C4DH41;P01825;P06331;P01824
							A0A3B3ISR2;B4DPQ0;P00736;F5H2D0;A0A3B3ITU4;F5H1V0;F5H6Y3		A0A2R8Y7C0;P69905;G3V1N2		F5GXS0;A0A140TA49;A0A140TA44;A0A140TA32;A0A140TA29;A0A0G2JL54;A0A0G2JPR0;P0C0L5;P0C0L4-2;P0C0L4;A0A3B3ISA6;CON__P01030;CON__ENSEMBL:ENSBTAP00000007350;A0A3B3ISD7		A0A0C4DH67
							A0A4W8ZXM2;A0A0B4J1Y9;A0A0B4J1V6		A0A3B3ISR2;B4DPQ0;P00736;F5H2D0;A0A3B3ITU4;F5H1V0;F5H6Y3		A0A0J9YY99;P0DP03;P01768;P0DP02;P01772;P01764		F5GXS0;A0A140TA49;A0A140TA44;A0A140TA32;A0A140TA29;A0A0G2JL54;A0A0G2JPR0;P0C0L5;P0C0L4-2;P0C0L4;A0A3B3ISA6;CON__P01030;CON__ENSEMBL:ENSBTAP00000007350;A0A3B3ISD7
							A0A7I2V2D2;P05155-2;P05155;P05155-3;E9PGN7;H9KV48;A0A087WUD9;A0A7I2V5R3;A0A7I2V2X2;A0A7I2V4I9		A0A4W8ZXM2;A0A0B4J1Y9;A0A0B4J1V6		A0A3B3IUA6;A0A3B3IRK9;G5E9F8;A0A3B3ISJ1;A0A0S2Z4L3;P07225		A0A0J9YY99;P0DP03;P01768;P0DP02;P01772;P01764
							A0A7P0T8E9;A0A7P0TAM9;A0A7P0T995;H0YG44;A0A7P0Z4J2;H7BZB4;A0A7P0Z4H1;A0A7P0T883;A0A7P0Z475;A0A7P0T8V8;Q4AC94-2;Q4AC94-4;Q4AC94-1;Q4AC94-3;Q4AC94		A0A7I2V2D2;P05155-2;P05155;P05155-3;E9PGN7;H9KV48;A0A087WUD9;A0A7I2V5R3;A0A7I2V2X2;A0A7I2V4I9		A0A182DWH7;P49908;A0A182DWH8		A0A3B3IUA6;A0A3B3IRK9;G5E9F8;A0A3B3ISJ1;A0A0S2Z4L3;P07225
							A0A7P0TAP4;A0A7P0Z441;A0A7P0T9S6;A0A7P0TA52;A0A7P0TBH1;A0A7P0T8D1;P01019		A0A7P0T8E9;A0A7P0TAM9;A0A7P0T995;H0YG44;A0A7P0Z4J2;H7BZB4;A0A7P0Z4H1;A0A7P0T883;A0A7P0Z475;A0A7P0T8V8;Q4AC94-2;Q4AC94-4;Q4AC94-1;Q4AC94-3;Q4AC94		CON__P13645;A0A1B0GVI3;P13645;CON__P02535-1;CON__A2A4G1;CON__Q148H6;CON__Q9Z2K1;CON__P08779;CON__Q3ZAW8;CON__Q7Z3Y7;Q7Z3Y7;P08779;K7EMD9;C9JM50;K7EPJ9;F8VZY9;CON__P08727;CON__P19001;CON__Q14525;K7ERE3;CON__Q9UE12;CON__Q15323;CON__A2A5Y0;CON__ENSEMBL:ENSP00000377550;CON__P05784;CON__Q92764;C4AM86;CON__P08730-1;CON__Q14532;CON__Q7Z3Z0;CON__Q6IFX2;CON__A2AB72;CON__Q497I4;CON__P19012;CON__O76015;CON_…		A0A182DWH7;P49908;A0A182DWH8
							B0YIW2;P02656		A0A7P0TAP4;A0A7P0Z441;A0A7P0T9S6;A0A7P0TA52;A0A7P0TBH1;A0A7P0T8D1;P01019		A0A4W9A917;A0A286YES1;P01860		CON__P13645;A0A1B0GVI3;P13645;CON__P02535-1;CON__A2A4G1;CON__Q148H6;CON__Q9Z2K1;CON__P08779;CON__Q3ZAW8;CON__Q7Z3Y7;Q7Z3Y7;P08779;K7EMD9;C9JM50;K7EPJ9;F8VZY9;CON__P08727;CON__P19001;CON__Q14525;K7ERE3;CON__Q9UE12;CON__Q15323;CON__A2A5Y0;CON__ENSEMBL:ENSP00000377550;CON__P05784;CON__Q92764;C4AM86;CON__P08730-1;CON__Q14532;CON__Q7Z3Z0;CON__Q6IFX2;CON__A2AB72;CON__Q497I4;CON__P19012;CON__O76015;CON_…
							C9JA05;D6RHJ6;D6RD17;P01591		A6NMB1		A0A286YEY1;P01876;A0A0G2JMB2;A0A286YEY5;P01877		A0A4W9A917;A0A286YES1;P01860
							C9JF17;P05090;C9JX71;F8WBT9		B0YIW2;P02656		A0A286YEY4;P01859		A0A286YEY1;P01876;A0A0G2JMB2;A0A286YEY5;P01877
							CON__ENSEMBL:ENSBTAP00000038253;CON__Q3TTY5;Q01546;CON__P48668;CON__P04259;CON__P02538;CON__P19013;CON__P12035;CON__Q01546;P19013;P48668;P02538;P12035		C9JA05;D6RHJ6;D6RD17;P01591		A0A3B3ISR2;B4DPQ0;P00736;F5H2D0;A0A3B3ITU4;F5H1V0;F5H6Y3		A0A286YEY4;P01859
							CON__P00761		C9JF17;P05090;C9JX71;F8WBT9		A0A4W8ZXM2;A0A0B4J1Y9;A0A0B4J1V6		I3L3I0;I3L1U9;A0A2R8Y793;A0A6Q8PFE4;E7EVS6;I3L4N8;P63261;P60709;C9JTX5;C9JUM1;C9JZR7;F8WB63;B8ZZJ2;G5E9R0;K7EM38;C9JFL5;F6UVQ4;F6QUT6;A0A6Q8PH58;A0A2R8YEA7;I3L3R2;A0A2R8YGF8;J3KT65;A0A804HKV3;A6NL76;A0A804GS07;P63267;P68133;P68032;P62736
							CON__P01966		M0R1V6;M0QZQ3;C9JY79;Q9H254-2;Q9H254-4;Q9H254		A0A7I2V2D2;P05155-2;P05155;P05155-3;E9PGN7;H9KV48;A0A087WUD9;A0A7I2V5R3;A0A7I2V2X2;A0A7I2V4I9		A0A2R8Y7C0;P69905;G3V1N2
							CON__P02533;P02533;F5GWP8;CON__Q04695;CON__Q9QWL7;Q04695;K7ESE1		CON__ENSEMBL:ENSBTAP00000038253;CON__Q3TTY5;Q01546;CON__P48668;CON__P04259;CON__P02538;CON__P19013;CON__P12035;CON__Q01546;P19013;P48668;P02538;P12035		A0A7P0T8E9;A0A7P0TAM9;A0A7P0T995;H0YG44;A0A7P0Z4J2;H7BZB4;A0A7P0Z4H1;A0A7P0T883;A0A7P0Z475;A0A7P0T8V8;Q4AC94-2;Q4AC94-4;Q4AC94-1;Q4AC94-3;Q4AC94		A0A3B3ISR2;B4DPQ0;P00736;F5H2D0;A0A3B3ITU4;F5H1V0;F5H6Y3
							CON__P02768-1;P02768;A0A0C4DGB6;B7WNR0;H0YA55;D6RHD5;A0A087WWT3;P02768-3;C9JKR2;P02768-2;H7C013		CON__P00761		A0A7P0TAP4;A0A7P0Z441;A0A7P0T9S6;A0A7P0TA52;A0A7P0TBH1;A0A7P0T8D1;P01019		A0A4W8ZXM2;A0A0B4J1Y9;A0A0B4J1V6
							CON__P02769		CON__P01966		A6NMB1		A0A7I2V2D2;P05155-2;P05155;P05155-3;E9PGN7;H9KV48;A0A087WUD9;A0A7I2V5R3;A0A7I2V2X2;A0A7I2V4I9
							CON__P12763		CON__P02533;P02533;F5GWP8;CON__Q04695;CON__Q9QWL7;Q04695;K7ESE1		B0YIW2;P02656		A0A7P0T8E9;A0A7P0TAM9;A0A7P0T995;H0YG44;A0A7P0Z4J2;H7BZB4;A0A7P0Z4H1;A0A7P0T883;A0A7P0Z475;A0A7P0T8V8;Q4AC94-2;Q4AC94-4;Q4AC94-1;Q4AC94-3;Q4AC94
							CON__P15497		CON__P02676		C9JA05;D6RHJ6;D6RD17;P01591		A0A7P0TAP4;A0A7P0Z441;A0A7P0T9S6;A0A7P0TA52;A0A7P0TBH1;A0A7P0T8D1;P01019
							CON__P34955		CON__P02768-1;P02768;A0A0C4DGB6;B7WNR0;H0YA55;D6RHD5;A0A087WWT3;P02768-3;C9JKR2;P02768-2;H7C013		C9JF17;P05090;C9JX71;F8WBT9		A6NMB1
							CON__P35527;P35527;K7EQQ3		CON__P02769		M0R1V6;M0QZQ3;C9JY79;Q9H254-2;Q9H254-4;Q9H254		B0YIW2;P02656
							CON__P35908;P35908		CON__P12763		CON__ENSEMBL:ENSBTAP00000038253;CON__Q3TTY5;Q01546;CON__P48668;CON__P04259;CON__P02538;CON__P19013;CON__P12035;CON__Q01546;P19013;P48668;P02538;P12035		C9JA05;D6RHJ6;D6RD17;P01591
							CON__Q32PJ2		CON__P15497		CON__P00761		C9JF17;P05090;C9JX71;F8WBT9
							CON__Q3SX09;CON__P02070;A0A2R8Y7X9;P69892;P69891;P02100		CON__P34955		CON__P02533;P02533;F5GWP8;CON__Q04695;CON__Q9QWL7;Q04695;K7ESE1		M0R1V6;M0QZQ3;C9JY79;Q9H254-2;Q9H254-4;Q9H254
							D6R934;P02746;A0A0A0MSV6;D6RGJ1		CON__P35527;P35527;K7EQQ3		CON__P02676		CON__ENSEMBL:ENSBTAP00000038253;CON__Q3TTY5;Q01546;CON__P48668;CON__P04259;CON__P02538;CON__P19013;CON__P12035;CON__Q01546;P19013;P48668;P02538;P12035
							D6RF35;P02774;P02774-3;P02774-2;D6RBJ7;CON__Q3MHN5;CON__ENSEMBL:ENSBTAP00000018229;D6RF20		CON__P35908;P35908		CON__P02768-1;P02768;A0A0C4DGB6;B7WNR0;H0YA55;D6RHD5;A0A087WWT3;P02768-3;C9JKR2;P02768-2;H7C013		CON__P00761
							E7END6;P04070;P04070-2		CON__Q32PJ2		CON__P02769		CON__P02533;P02533;F5GWP8;CON__Q04695;CON__Q9QWL7;Q04695;K7ESE1
							H7C5R1;E9PFZ2;P00450;H7C5N5;CON__ENSEMBL:ENSBTAP00000031900		CON__Q3SX09;CON__P02070;A0A2R8Y7X9;P69892;P69891;P02100		CON__P12763		CON__P02768-1;P02768;A0A0C4DGB6;B7WNR0;H0YA55;D6RHD5;A0A087WWT3;P02768-3;C9JKR2;P02768-2;H7C013
							E9PIT3;P00734;CON__P00735;C9JV37		D6R934;P02746;A0A0A0MSV6;D6RGJ1		CON__P15497		CON__P02769
							F5H2Z5;H0YF87;H0YFJ9;F5GWF3;Q9NZP8		D6RF35;P02774;P02774-3;P02774-2;D6RBJ7;CON__Q3MHN5;CON__ENSEMBL:ENSBTAP00000018229;D6RF20		CON__P34955		CON__P12763
							H0YAC1;P03952;E9PBC5;C9JCT1;C9J075		E7END6;P04070;P04070-2		CON__P35527;P35527;K7EQQ3		CON__P15497
							K7ERI9;P02654;K7EKP1;K7EJI9;K7ELM9;K7EPF9		H7C5R1;E9PFZ2;P00450;H7C5N5;CON__ENSEMBL:ENSBTAP00000031900		CON__P35908;P35908		CON__P34955
							O14791;O14791-2;O14791-3;B1AH96;B1AH94;B1AH95;F8WCH3		E9PIT3;P00734;CON__P00735;C9JV37		CON__Q32PJ2		CON__P35527;P35527;K7EQQ3
							P00738;J3QR68;H0Y300;A0A0C4DGL8;P00738-2;J3QLC9;A0A087WU08;H3BS21;J3KRH2;J3KTC3;J3KSV1;J3QQI8;H3BMJ7		E9PQI5;E9PQ80;E9PSI1;Q9BY43;Q9BY43-2		CON__Q3SX09;CON__P02070;A0A2R8Y7X9;P69892;P69891;P02100		CON__P35908;P35908
							P00747;CON__P06868;Q5TEH5;A6PVI2;Q02325		F5H2Z5;H0YF87;H0YFJ9;F5GWF3;Q9NZP8		D6R934;P02746;A0A0A0MSV6;D6RGJ1		CON__Q32PJ2
							P00748		F5GY80;F5H7G1;P07358		D6RF35;P02774;P02774-3;P02774-2;D6RBJ7;CON__Q3MHN5;CON__ENSEMBL:ENSBTAP00000018229;D6RF20		CON__Q3SX09;CON__P02070;A0A2R8Y7X9;P69892;P69891;P02100
							P01008;CON__P41361		H0YAC1;P03952;E9PBC5;C9JCT1;C9J075		E7END6;P04070;P04070-2		D6R934;P02746;A0A0A0MSV6;D6RGJ1
							P01011;G3V3A0;G3V595;P01011-2		K7ERI9;P02654;K7EKP1;K7EJI9;K7ELM9;K7EPF9		H7C5R1;E9PFZ2;P00450;H7C5N5;CON__ENSEMBL:ENSBTAP00000031900		D6RF35;P02774;P02774-3;P02774-2;D6RBJ7;CON__Q3MHN5;CON__ENSEMBL:ENSBTAP00000018229;D6RF20
							P01023;F8W7L3;H0YFH1;CON__ENSEMBL:ENSBTAP00000024146;P20742-2;P20742		O14791;O14791-2;O14791-3;B1AH96;B1AH94;B1AH95;F8WCH3		E9PIT3;P00734;CON__P00735;C9JV37		E7END6;P04070;P04070-2
							P01024;M0QXZ3;CON__Q2UVX4;M0QYC8;M0R0Q9		P00738;J3QR68;H0Y300;A0A0C4DGL8;P00738-2;J3QLC9;A0A087WU08;H3BS21;J3KRH2;J3KTC3;J3KSV1;J3QQI8;H3BMJ7		E9PQI5;E9PQ80;E9PSI1;Q9BY43;Q9BY43-2		E9PAQ1;P27918;C9J7V5
							P01042		P00747;CON__P06868;Q5TEH5;A6PVI2;Q02325		F5H2Z5;H0YF87;H0YFJ9;F5GWF3;Q9NZP8		H7C5R1;E9PFZ2;P00450;H7C5N5;CON__ENSEMBL:ENSBTAP00000031900
							P01042-2;P01042-3		P00748		F5GY80;F5H7G1;P07358		E9PIT3;P00734;CON__P00735;C9JV37
							P01700;P01699		P01008;CON__P41361		G3XAP6;P49747-2;P49747		E9PQI5;E9PQ80;E9PSI1;Q9BY43;Q9BY43-2
							P01714		P01011;G3V3A0;G3V595;P01011-2		H0YAC1;P03952;E9PBC5;C9JCT1;C9J075		F5H2Z5;H0YF87;H0YFJ9;F5GWF3;Q9NZP8
							P01834;A0A5H1ZRQ3		P01023;F8W7L3;H0YFH1;CON__ENSEMBL:ENSBTAP00000024146;P20742-2;P20742		K7ERI9;P02654;K7EKP1;K7EJI9;K7ELM9;K7EPF9		F5GY80;F5H7G1;P07358
							P01871;P01871-2		P01024;M0QXZ3;CON__Q2UVX4;M0QYC8;M0R0Q9		O00391-2;O00391		H0YAC1;P03952;E9PBC5;C9JCT1;C9J075
							P02647;F8W696		P01042		O14791;O14791-2;O14791-3;B1AH96;B1AH94;B1AH95;F8WCH3		K7ERI9;P02654;K7EKP1;K7EJI9;K7ELM9;K7EPF9
							P02649;H0Y7L5;E9PEV4;E7ERP7;CON__Q03247		P01042-2;P01042-3		P00738;J3QR68;H0Y300;A0A0C4DGL8;P00738-2;J3QLC9;A0A087WU08;H3BS21;J3KRH2;J3KTC3;J3KSV1;J3QQI8;H3BMJ7		O00391-2;O00391
							V9GYM3;P02652;V9GYE3;V9GYG9;V9GYC1;V9GYS1		P01714		P00747;CON__P06868;Q5TEH5;A6PVI2;Q02325		O14791;O14791-2;O14791-3;B1AH96;B1AH94;B1AH95;F8WCH3
							P02671-2;P02671;A0A087WUA0;CON__P02672		P01834;A0A5H1ZRQ3		P00748		P00738;J3QR68;H0Y300;A0A0C4DGL8;P00738-2;J3QLC9;A0A087WU08;H3BS21;J3KRH2;J3KTC3;J3KSV1;J3QQI8;H3BMJ7
							P02675;D6REL8		P01871;P01871-2		P01008;CON__P41361		P00747;CON__P06868;Q5TEH5;A6PVI2;Q02325
							P02679-2;P02679;C9JEU5;C9JC84		P02647;F8W696		P01011;G3V3A0;G3V595;P01011-2		P00748
							P02747		P02649;H0Y7L5;E9PEV4;E7ERP7;CON__Q03247		P01023;F8W7L3;H0YFH1;CON__ENSEMBL:ENSBTAP00000024146;P20742-2;P20742		P01008;CON__P41361
							P02749;J3QLI0;J3KS17;J3QRN2		V9GYM3;P02652;V9GYE3;V9GYG9;V9GYC1;V9GYS1		P01024;M0QXZ3;CON__Q2UVX4;M0QYC8;M0R0Q9		P01011;G3V3A0;G3V595;P01011-2
							P02750		P02671-2;P02671;A0A087WUA0;CON__P02672		P01042		P01023;F8W7L3;H0YFH1;CON__ENSEMBL:ENSBTAP00000024146;P20742-2;P20742
							P02751-10;P02751-5;P02751-9;P02751-14;P02751-13;P02751-8;P02751-17;P02751-3;P02751-1;P02751-7;P02751;P02751-12;P02751-6;P02751-11;P02751-4;H0Y7Z1;P02751-16;P02751-2		P02675;D6REL8		P01700;P01699		P01024;M0QXZ3;CON__Q2UVX4;M0QYC8;M0R0Q9
							P02760;S4R3Y4		P02679-2;P02679;C9JEU5;C9JC84		P01714		P01042
							P02763		P02745;X6RLJ0		P01834;A0A5H1ZRQ3		P01042-2;P01042-3
							P02765;C9JV77		P02747		P01871;P01871-2		P01700;P01699
							P02787;F8WCI6;H7C5E8;C9JB55;F8WEK9;C9JVG0;F8WC57		P02749;J3QLI0;J3KS17;J3QRN2		P02647;F8W696		P01714
							P02790;Q9BS19		P02751-10;P02751-5;P02751-9;P02751-14;P02751-13;P02751-8;P02751-17;P02751-3;P02751-1;P02751-7;P02751;P02751-12;P02751-6;P02751-11;P02751-4;H0Y7Z1;P02751-16;P02751-2		P02649;H0Y7L5;E9PEV4;E7ERP7;CON__Q03247		P01834;A0A5H1ZRQ3
							P04004		P02760;S4R3Y4		V9GYM3;P02652;V9GYE3;V9GYG9;V9GYC1;V9GYS1		P01871;P01871-2
							P04114;A8MUN2;A0A669KB70		P02765;C9JV77		P02671-2;P02671;A0A087WUA0;CON__P02672		P02647;F8W696
							P04196		P02787;F8WCI6;H7C5E8;C9JB55;F8WEK9;C9JVG0;F8WC57		P02675;D6REL8		P02649;H0Y7L5;E9PEV4;E7ERP7;CON__Q03247
							P04217;P04217-2;M0R009;CON__Q2KJF1		P03951;P03951-2;X6R3B1;D6RB32;H0Y596		P02679-2;P02679;C9JEU5;C9JC84		V9GYM3;P02652;V9GYE3;V9GYG9;V9GYC1;V9GYS1
							P04264;CON__P04264;CON__Q9R0H5;CON__Q6NXH9;CON__Q8BGZ7;CON__P50446;CON__Q6IFZ6;CON__Q7Z794;CON__Q922U2;CON__Q5XQN5;Q7Z794		P04004		P02745;X6RLJ0		P02671-2;P02671;A0A087WUA0;CON__P02672
							P05546		P04114;A8MUN2;A0A669KB70		P02747		P02675;D6REL8
							P06312		P04196		P02749;J3QLI0;J3KS17;J3QRN2		P02679-2;P02679;C9JEU5;C9JC84
							P06396;A0A0A0MS51;A0A0A0MT01;P06396-2;P06396-4;P06396-3;CON__Q3SX14;Q5T0I0;A0A0U1RQL8;REV__H0YJM7;REV__A0A6Q8PG26;REV__Q6TDU7-4;REV__Q6TDU7-2;REV__Q6TDU7-3;REV__Q6TDU7;REV__F8W8F9		P04217;P04217-2;M0R009;CON__Q2KJF1		P02751-10;P02751-5;P02751-9;P02751-14;P02751-13;P02751-8;P02751-17;P02751-3;P02751-1;P02751-7;P02751;P02751-12;P02751-6;P02751-11;P02751-4;H0Y7Z1;P02751-16;P02751-2		P02745;X6RLJ0
							P06727		P04264;CON__P04264;CON__Q9R0H5;CON__Q6NXH9;CON__Q8BGZ7;CON__P50446;CON__Q6IFZ6;CON__Q7Z794;CON__Q922U2;CON__Q5XQN5;Q7Z794		P02760;S4R3Y4		P02747
							P07357		P05154;G3V5I3;G3V482;G3V265;G3V264;G3V2M1		P02765;C9JV77		P02749;J3QLI0;J3KS17;J3QRN2
							P08185;G3V4V7;G3V350		P06312		P02787;F8WCI6;H7C5E8;C9JB55;F8WEK9;C9JVG0;F8WC57		P02751-10;P02751-5;P02751-9;P02751-14;P02751-13;P02751-8;P02751-17;P02751-3;P02751-1;P02751-7;P02751;P02751-12;P02751-6;P02751-11;P02751-4;H0Y7Z1;P02751-16;P02751-2
							P08519;A0A087WWY0		P06396;A0A0A0MS51;A0A0A0MT01;P06396-2;P06396-4;P06396-3;CON__Q3SX14;Q5T0I0;A0A0U1RQL8;REV__H0YJM7;REV__A0A6Q8PG26;REV__Q6TDU7-4;REV__Q6TDU7-2;REV__Q6TDU7-3;REV__Q6TDU7;REV__F8W8F9		P03951;P03951-2;X6R3B1;D6RB32;H0Y596		P02760;S4R3Y4
							P08603		P06727		P04004		P02765;C9JV77
							P08697;A0A0G2JPA8;P08697-2;C9JMH6;A0A0J9YY65;C9JPV4;A0A0J9YWQ3		P07357		P04114;A8MUN2;A0A669KB70		P02787;F8WCI6;H7C5E8;C9JB55;F8WEK9;C9JVG0;F8WC57
							P0DOY3;P0DOY2;P0CF74;A0A5H1ZRQ7;A0M8Q6		P08519;A0A087WWY0		P04196		P03951;P03951-2;X6R3B1;D6RB32;H0Y596
							P10909-4;P10909-6;P10909;P10909-5;P10909-2;P10909-3;H0YAS8;H0YC35;E5RG36;E5RGB0;E5RH61;E5RJZ5;E7ERK6;E7ETB4;H0YLK8		P0DOY3;P0DOY2;P0CF74;A0A5H1ZRQ7;A0M8Q6		P04264;CON__P04264;CON__Q9R0H5;CON__Q6NXH9;CON__Q8BGZ7;CON__P50446;CON__Q6IFZ6;CON__Q7Z794;CON__Q922U2;CON__Q5XQN5;Q7Z794		P04004
							P15814		P10909-4;P10909-6;P10909;P10909-5;P10909-2;P10909-3;H0YAS8;H0YC35;E5RG36;E5RGB0;E5RH61;E5RJZ5;E7ERK6;E7ETB4;H0YLK8		P05154;G3V5I3;G3V482;G3V265;G3V264;G3V2M1		P04114;A8MUN2;A0A669KB70
							P19652		P19652		P06312		P04196
							Q5T985;P19823;Q5T987;CON__Q9TRI1		Q5T985;P19823;Q5T987;CON__Q9TRI1		P06396;A0A0A0MS51;A0A0A0MT01;P06396-2;P06396-4;P06396-3;CON__Q3SX14;Q5T0I0;A0A0U1RQL8;REV__H0YJM7;REV__A0A6Q8PG26;REV__Q6TDU7-4;REV__Q6TDU7-2;REV__Q6TDU7-3;REV__Q6TDU7;REV__F8W8F9		P04264;CON__P04264;CON__Q9R0H5;CON__Q6NXH9;CON__Q8BGZ7;CON__P50446;CON__Q6IFZ6;CON__Q7Z794;CON__Q922U2;CON__Q5XQN5;Q7Z794
							P19827;F8WAS2;CON__Q0VCM5;P19827-2		P22792		P06727		P05154;G3V5I3;G3V482;G3V265;G3V264;G3V2M1
							P22792		P27169;F8WF42		P07357		P05546
							P25311;C9JEV0;H7BZJ8		P35858;P35858-2		P08519;A0A087WWY0		P06312
							P35858;P35858-2		P55056;K7EMC3;K7ER74		P08697;A0A0G2JPA8;P08697-2;C9JMH6;A0A0J9YY65;C9JPV4;A0A0J9YWQ3		P06396;A0A0A0MS51;A0A0A0MT01;P06396-2;P06396-4;P06396-3;CON__Q3SX14;Q5T0I0;A0A0U1RQL8;REV__H0YJM7;REV__A0A6Q8PG26;REV__Q6TDU7-4;REV__Q6TDU7-2;REV__Q6TDU7-3;REV__Q6TDU7;REV__F8W8F9
							P36955;I3L107;I3L4Z0;I3L4N7		Q14624;B7ZKJ8;Q14624-4;Q14624-3;Q14624-2;H7C0L5;CON__Q3T052		P0DOY3;P0DOY2;P0CF74;A0A5H1ZRQ7;A0M8Q6		P06727
							P43652;CON__REFSEQ:XP_585019		Q7Z5P9-2;Q7Z5P9		P10909-4;P10909-6;P10909;P10909-5;P10909-2;P10909-3;H0YAS8;H0YC35;E5RG36;E5RGB0;E5RH61;E5RJZ5;E7ERK6;E7ETB4;H0YLK8		P07357
							P51884;CON__Q05443				P15814		P07360;A0A3B3ITK5
							P68871;A0A2R8Y7R2;P02042;F8W6P5;E9PFT6;E9PEW8				Q5T985;P19823;Q5T987;CON__Q9TRI1		P08519;A0A087WWY0
							Q14624;B7ZKJ8;Q14624-4;Q14624-3;Q14624-2;H7C0L5;CON__Q3T052				P22792		P08697;A0A0G2JPA8;P08697-2;C9JMH6;A0A0J9YY65;C9JPV4;A0A0J9YWQ3
							Q7Z5P9-2;Q7Z5P9				P27169;F8WF42		P0DOY3;P0DOY2;P0CF74;A0A5H1ZRQ7;A0M8Q6
							Q96PD5;Q96PD5-2				P35858;P35858-2		P10909-4;P10909-6;P10909;P10909-5;P10909-2;P10909-3;H0YAS8;H0YC35;E5RG36;E5RGB0;E5RH61;E5RJZ5;E7ERK6;E7ETB4;H0YLK8
											P55056;K7EMC3;K7ER74		P19652
											Q14520-2;Q14520		Q5T985;P19823;Q5T987;CON__Q9TRI1
											Q14624;B7ZKJ8;Q14624-4;Q14624-3;Q14624-2;H7C0L5;CON__Q3T052		P27169;F8WF42
											Q7Z5P9-2;Q7Z5P9		P35858;P35858-2
											Q8N5G2-2;Q8N5G2-3;Q8N5G2		P55056;K7EMC3;K7ER74
											Q9NVR7-2;Q9NVR7		Q14520-2;Q14520
											Q9UHG3-2;Q9UHG3;C9JGT6;C9JM55;C9K055;F8W8W4		Q14624;B7ZKJ8;Q14624-4;Q14624-3;Q14624-2;H7C0L5;CON__Q3T052
													Q16777;Q6FI13
													Q7Z5P9-2;Q7Z5P9
													Q92954-5;Q92954-4;Q92954-3;Q92954-6;Q92954-2;Q92954
													Q9NVR7-2;Q9NVR7
													Q9P225-3
													Q9UHG3-2;Q9UHG3;C9JGT6;C9JM55;C9K055;F8W8W4

## Sheet: table8
table 8. Enriched biological process for differencial abundant proteins
Term	P-value	Adjusted P-value	Genes
platelet degranulation (GO:0002576)	6.12442e-25	4.59944e-22	FGB;FGA;ITIH4;SERPINA1;AHSG;FGG;SERPINF2;FN1;APOA1;ORM2;KNG1;F5;TF;ALB;SERPING1;A2M;HRG
negative regulation of blood coagulation (GO:0030195)	2.71694e-22	9.79157e-20	FGB;FGA;F12;FGG;SERPINF2;SERPING1;APOE;A2M;F2;HRG;KLKB1;KNG1
regulated exocytosis (GO:0045055)	3.91141e-22	9.79157e-20	FGB;FGA;ITIH4;SERPINA1;AHSG;FGG;SERPINF2;FN1;APOA1;ORM2;KNG1;F5;TF;ALB;SERPING1;A2M;HRG
cellular protein metabolic process (GO:0044267)	6.35548e-16	1.19324e-13	FGA;SERPINA1;AHSG;SERPINC1;FGG;APOA2;FN1;APOA1;F2;CP;KNG1;F5;TF;ALB;IGFALS;APOE;APOB
post-translational protein modification (GO:0043687)	1.67662e-14	2.51829e-12	FGA;SERPINA1;AHSG;SERPINC1;FGG;APOA2;FN1;APOA1;CP;KNG1;F5;TF;ALB;APOE;APOB
regulation of complement activation (GO:0030449)	9.439e-13	1.18145e-10	C1QB;C1QA;C1R;SERPING1;C8B;F2;C8A;C1QC
regulation of immune effector process (GO:0002697)	1.54853e-12	1.50419e-10	C1QB;C1QA;C1R;SERPING1;C8B;F2;C8A;C1QC
fibrinolysis (GO:0042730)	1.60234e-12	1.50419e-10	FGB;FGA;FGG;SERPINF2;F2;HRG
regulation of humoral immune response (GO:0002920)	1.81405e-12	1.51372e-10	C1QB;C1QA;C1R;SERPING1;C8B;F2;C8A;C1QC
negative regulation of endopeptidase activity (GO:0010951)	6.62653e-12	4.52411e-10	SERPINA1;AHSG;SERPINC1;SERPINF2;SERPING1;HRG;KNG1;AGT
negative regulation of peptidase activity (GO:0010466)	6.62653e-12	4.52411e-10	SERPINA1;AHSG;SERPINC1;SERPINF2;SERPING1;HRG;KNG1;AGT
positive regulation of cholesterol esterification (GO:0010873)	1.63039e-11	8.74589e-10	APOA2;APOA1;APOA4;APOE;AGT
chylomicron remodeling (GO:0034371)	1.63039e-11	8.74589e-10	APOA2;APOA1;APOA4;APOE;APOB
complement activation, classical pathway (GO:0006958)	1.63039e-11	8.74589e-10	C1QB;C1QA;IGLL5;C1R;C1QC
regulation of endopeptidase activity (GO:0052548)	1.79015e-11	8.96271e-10	SERPINA1;AHSG;SERPINC1;SERPINF2;SERPING1;HRG;KNG1;AGT
chylomicron assembly (GO:0034378)	3.25404e-11	1.47991e-09	APOA2;APOA1;APOA4;APOE;APOB
zymogen activation (GO:0031638)	3.35e-11	1.47991e-09	FGB;FGA;C1R;F12;FGG;HP;KLKB1
humoral immune response mediated by circulating immunoglobulin (GO:0002455)	5.95339e-11	2.48389e-09	C1QB;C1QA;IGLL5;C1R;C1QC
regulation of cholesterol esterification (GO:0010872)	1.01847e-10	4.02563e-09	APOA2;APOA1;APOA4;APOE;AGT
regulation of fibrinolysis (GO:0051917)	1.65158e-10	5.63789e-09	F12;SERPINF2;F2;HRG;KLKB1
positive regulation of steroid metabolic process (GO:0045940)	1.65158e-10	5.63789e-09	APOA2;APOA1;APOA4;APOE;AGT
triglyceride-rich lipoprotein particle remodeling (GO:0034370)	1.65158e-10	5.63789e-09	APOA2;APOA1;APOA4;APOE;APOB
negative regulation of blood coagulation, intrinsic pathway (GO:2000267)	2.55287e-10	7.98834e-09	F12;SERPING1;A2M;KLKB1
regulation of blood coagulation, intrinsic pathway (GO:2000266)	2.55287e-10	7.98834e-09	F12;SERPING1;A2M;KLKB1
high-density lipoprotein particle remodeling (GO:0034375)	1.08815e-09	3.2688e-08	ALB;APOA2;APOA1;APOA4;APOE
negative regulation of protein activation cascade (GO:2000258)	6.38128e-09	1.71155e-07	F12;SERPING1;A2M;KLKB1
lipoprotein metabolic process (GO:0042157)	6.38128e-09	1.71155e-07	APOA2;APOA1;APOA4;APOE
plasminogen activation (GO:0031639)	6.38128e-09	1.71155e-07	FGB;FGA;FGG;KLKB1
positive regulation of lipid metabolic process (GO:0045834)	6.65002e-09	1.72213e-07	APOA2;APOA1;APOA4;APOE;F2
regulation of blood coagulation (GO:0030193)	1.00626e-08	2.519e-07	F12;APOE;F2;HRG;KNG1
diterpenoid metabolic process (GO:0016101)	2.16572e-08	5.24662e-07	TTR;APOA2;APOA1;APOA4;APOE;APOB
phospholipid efflux (GO:0033700)	2.49168e-08	5.84766e-07	APOA2;APOA1;APOA4;APOE
high-density lipoprotein particle assembly (GO:0034380)	3.59177e-08	8.17401e-07	APOA2;APOA1;APOA4;APOE
low-density lipoprotein particle remodeling (GO:0034374)	5.01825e-08	1.10844e-06	APOA2;APOB;LPA;AGT
cellular protein modification process (GO:0006464)	6.88653e-08	1.47765e-06	FGA;SERPINA1;AHSG;SERPINC1;FGG;APOA2;FN1;APOA1;CP;KNG1;F5;TF;ALB;APOE;APOB
extracellular matrix organization (GO:0030198)	1.18409e-07	2.34368e-06	FGB;FGA;TTR;GSN;FGG;SERPINF2;FN1;A2M;KLKB1
positive regulation of blood coagulation (GO:0030194)	1.18588e-07	2.34368e-06	F12;SERPINF2;F2;HRG
reverse cholesterol transport (GO:0043691)	1.18588e-07	2.34368e-06	APOA2;APOA1;APOA4;APOE
positive regulation of biosynthetic process (GO:0009891)	1.30657e-07	2.51599e-06	SERPINF2;APOA1;APOA4;APOE;F2
retinoid metabolic process (GO:0001523)	1.94207e-07	3.64624e-06	TTR;APOA2;APOA1;APOA4;APOE;APOB
secondary alcohol metabolic process (GO:1902652)	2.27039e-07	4.1587e-06	APOA2;APOA1;APOA4;APOE;APOB
cholesterol transport (GO:0030301)	2.78523e-07	4.98027e-06	APOA2;APOA1;APOA4;APOE;APOB
cell junction disassembly (GO:0150146)	3.91245e-07	6.83314e-06	C1QB;C1QA;C1QC
positive regulation of cellular metabolic process (GO:0031325)	4.26498e-07	7.27954e-06	APOA2;APOA1;APOA4;APOE;F2;AGT
cholesterol efflux (GO:0033344)	5.21962e-07	8.71096e-06	APOA2;APOA1;APOA4;APOE
regulation of heterotypic cell-cell adhesion (GO:0034114)	6.20118e-07	1.01241e-05	FGB;FGA;FGG;APOA1
protein-containing complex assembly (GO:0065003)	6.42814e-07	1.02714e-05	FGB;FGA;SERPINA1;FGG;FN1;APOA4;JCHAIN;F5
amyloid fibril formation (GO:1990000)	8.12824e-07	1.27173e-05	FGA;TTR;GSN;APOA1;APOA4
positive regulation of peptide secretion (GO:0002793)	1.09123e-06	1.67248e-05	FGB;FGA;FGG
regulation of vasoconstriction (GO:0019229)	1.3298e-06	1.9921e-05	FGB;FGA;FGG;AGT
positive regulation of cell-substrate adhesion (GO:0010811)	1.37935e-06	1.9921e-05	FGB;FGA;FGG;FN1;APOA1
sterol metabolic process (GO:0016125)	1.37935e-06	1.9921e-05	APOA2;APOA1;APOA4;APOE;APOB
cholesterol homeostasis (GO:0042632)	1.48076e-06	2.09821e-05	APOA2;APOA1;APOA4;APOE;APOB
sterol homeostasis (GO:0055092)	1.58795e-06	2.15243e-05	APOA2;APOA1;APOA4;APOE;APOB
negative regulation of fibrinolysis (GO:0051918)	1.63367e-06	2.15243e-05	SERPINF2;F2;HRG
synapse pruning (GO:0098883)	1.63367e-06	2.15243e-05	C1QB;C1QA;C1QC
very-low-density lipoprotein particle remodeling (GO:0034372)	1.63367e-06	2.15243e-05	APOA1;APOA4;APOE
cholesterol metabolic process (GO:0008203)	2.21916e-06	2.87343e-05	APOA2;APOA1;APOA4;APOE;APOB
receptor-mediated endocytosis (GO:0006898)	2.61285e-06	3.32584e-05	ALB;HP;APOA1;APOE;APOB;JCHAIN
positive regulation of substrate adhesion-dependent cell spreading (GO:1900026)	2.82357e-06	3.47623e-05	FGB;FGA;FGG;APOA1
platelet aggregation (GO:0070527)	2.82357e-06	3.47623e-05	FGB;FGA;FGG;FN1
positive regulation of transport (GO:0051050)	5.07321e-06	6.14513e-05	AHSG;PON1;APOA2;APOA1;APOE
antibacterial humoral response (GO:0019731)	6.40188e-06	7.51221e-05	FGB;FGA;TF;JCHAIN
homotypic cell-cell adhesion (GO:0034109)	6.40188e-06	7.51221e-05	FGB;FGA;FGG;FN1
positive regulation of cell-cell adhesion (GO:0022409)	8.36025e-06	9.65931e-05	FGB;FGA;FGG;SERPINF2
positive regulation of heterotypic cell-cell adhesion (GO:0034116)	8.74625e-06	9.95217e-05	FGB;FGA;FGG
positive regulation of cell morphogenesis involved in differentiation (GO:0010770)	1.07287e-05	0.000118654	FGB;FGA;FGG;APOA1
positive regulation of vasoconstriction (GO:0045907)	1.07437e-05	0.000118654	FGB;FGA;FGG
regulation of substrate adhesion-dependent cell spreading (GO:1900024)	1.16181e-05	0.000126452	FGB;FGA;FGG;APOA1
protein polymerization (GO:0051258)	2.08173e-05	0.000220194	FGB;FGA;GSN;FGG
phospholipid transport (GO:0015914)	2.08173e-05	0.000220194	APOA2;APOA1;APOA4;APOE
positive regulation of hormone secretion (GO:0046887)	2.17013e-05	0.000223256	FGB;FGA;FGG
positive regulation of protein processing (GO:0010954)	2.17013e-05	0.000223256	GSN;F12;KLKB1
pattern recognition receptor signaling pathway (GO:0002221)	2.37724e-05	0.000241258	FGB;FGA;FGG;APOB
sterol transport (GO:0015918)	2.52689e-05	0.000253026	APOA2;APOA1;APOB
positive regulation of lipid catabolic process (GO:0050996)	2.92018e-05	0.000284812	APOA2;APOA1;APOA4
regulation of platelet activation (GO:0010543)	2.92018e-05	0.000284812	APOE;F2;HRG
positive regulation of cholesterol efflux (GO:0010875)	3.35167e-05	0.000322706	PON1;APOA1;APOE
positive regulation of response to external stimulus (GO:0032103)	3.96924e-05	0.000377329	SIGLEC16;SERPINF2;F2;HRG;AGT
acylglycerol homeostasis (GO:0055090)	4.3359e-05	0.000402008	APOA1;APOA4;APOE
regulation of cholesterol transport (GO:0032374)	4.3359e-05	0.000402008	APOA2;APOA1;APOA4
regulation of ERK1 and ERK2 cascade (GO:0070372)	4.74699e-05	0.000434755	FGB;FGA;FGG;SERPINF2;FN1;APOE
acute inflammatory response (GO:0002526)	5.49271e-05	0.000491074	ITIH4;AHSG;HP
negative regulation of endothelial cell apoptotic process (GO:2000352)	5.49271e-05	0.000491074	FGB;FGA;FGG
phosphatidylcholine metabolic process (GO:0046470)	5.96708e-05	0.000527209	PON1;APOA2;APOA1;APOA4
negative regulation of cellular component organization (GO:0051129)	6.93131e-05	0.000605281	PON1;APOA2;APOA1;APOA4
regulation of intestinal lipid absorption (GO:1904729)	7.38577e-05	0.000637553	APOA1;APOA4
triglyceride homeostasis (GO:0070328)	8.37546e-05	0.000714769	APOA1;APOA4;APOE
positive regulation of cholesterol transport (GO:0032376)	0.000101266	0.000845007	PON1;APOA1;APOE
regulation of cholesterol efflux (GO:0010874)	0.000101266	0.000845007	PON1;APOA1;APOE
positive regulation of ERK1 and ERK2 cascade (GO:0070374)	0.00010904	0.000885619	FGB;FGA;FGG;SERPINF2;APOE
regulation of very-low-density lipoprotein particle remodeling (GO:0010901)	0.000110591	0.000885619	APOA2;APOA1
induction of bacterial agglutination (GO:0043152)	0.000110591	0.000885619	FGB;FGA
negative regulation of extrinsic apoptotic signaling pathway via death domain receptors (GO:1902042)	0.00011085	0.000885619	FGB;FGA;FGG
toll-like receptor signaling pathway (GO:0002224)	0.000114538	0.000905454	FGB;FGA;FGG;APOB
positive regulation of lipid biosynthetic process (GO:0046889)	0.000121006	0.000936863	APOA1;APOA4;APOE
regulation of lipid biosynthetic process (GO:0046890)	0.000121006	0.000936863	APOA1;APOA4;APOE
retina homeostasis (GO:0001895)	0.00013175	0.00100964	TF;ALB;JCHAIN
negative regulation of cytokine production (GO:0001818)	0.000142129	0.00106401	APOA2;FN1;APOA1;APOD;F2
negative regulation of epithelial cell apoptotic process (GO:1904036)	0.000143097	0.00106401	FGB;FGA;FGG
positive regulation of exocytosis (GO:0045921)	0.000143097	0.00106401	FGB;FGA;FGG
regulation of systemic arterial blood pressure by renin-angiotensin (GO:0003081)	0.000154555	0.0011269	SERPINF2;AGT
chylomicron remnant clearance (GO:0034382)	0.000154555	0.0011269	APOE;APOB
cell-matrix adhesion (GO:0007160)	0.000164998	0.00119147	FGB;FGA;FGG;FN1
regulation of cellular component biogenesis (GO:0044087)	0.000167655	0.00119913	APOE;HRG;AGT
regulation of Cdc42 protein signal transduction (GO:0032489)	0.00020571	0.00140981	APOA1;APOE
positive regulation of lipoprotein lipase activity (GO:0051006)	0.00020571	0.00140981	APOA1;APOA4
regulation of intestinal cholesterol absorption (GO:0030300)	0.00020571	0.00140981	APOA1;APOA4
positive regulation of triglyceride catabolic process (GO:0010898)	0.00020571	0.00140981	APOA1;APOA4
protein processing (GO:0016485)	0.000206497	0.00140981	C1R;F12;HP;KLKB1
regulation of extrinsic apoptotic signaling pathway via death domain receptors (GO:1902041)	0.000209376	0.00141659	FGB;FGA;FGG
positive regulation of peptide hormone secretion (GO:0090277)	0.000224642	0.0015063	FGB;FGA;FGG
regulation of endothelial cell apoptotic process (GO:2000351)	0.00024061	0.0015991	FGB;FGA;FGG
negative regulation of production of molecular mediator of immune response (GO:0002701)	0.000264018	0.00169468	APOA2;APOA1
cytolysis by host of symbiont cells (GO:0051838)	0.000264018	0.00169468	F2;HRG
cytolysis in other organism involved in symbiotic interaction (GO:0051801)	0.000264018	0.00169468	F2;HRG
positive regulation of triglyceride lipase activity (GO:0061365)	0.000264018	0.00169468	APOA1;APOA4
extracellular structure organization (GO:0043062)	0.00031458	0.00200211	FGB;FGA;TTR;FGG;FN1
external encapsulating structure organization (GO:0045229)	0.000321331	0.0020279	FGB;FGA;TTR;FGG;FN1
positive regulation of coagulation (GO:0050820)	0.000329441	0.00202795	F12;F2
positive regulation of hemostasis (GO:1900048)	0.000329441	0.00202795	F12;F2
peptidyl-amino acid modification (GO:0018193)	0.000329441	0.00202795	APOA2;APOA1
blood circulation (GO:0008015)	0.000373225	0.0022788	SERPING1;LPA;F5
regulation of protein secretion (GO:0050708)	0.000387596	0.00232198	FGB;FGA;FGG;APOE
supramolecular fiber organization (GO:0097435)	0.000393231	0.00232198	FGA;TTR;GSN;SERPINF2;APOA1;APOA4
regulation of exocytosis (GO:0017157)	0.000395307	0.00232198	FGB;FGA;FGG
protein oxidation (GO:0018158)	0.00040194	0.00232198	APOA2;APOA1
regulation of coagulation (GO:0050818)	0.00040194	0.00232198	F2;HRG
positive regulation of phospholipid transport (GO:2001140)	0.00040194	0.00232198	APOA1;APOE
organophosphate catabolic process (GO:0046434)	0.00040194	0.00232198	PON1;APOA2
positive regulation of phagocytosis (GO:0050766)	0.000418212	0.00239753	AHSG;APOA2;APOA1
triglyceride metabolic process (GO:0006641)	0.000466543	0.00263934	APOA2;APOE;APOB
negative regulation of complement activation (GO:0045916)	0.000481478	0.00263934	SERPING1;A2M
regulation of triglyceride catabolic process (GO:0010896)	0.000481478	0.00263934	APOA1;APOA4
negative regulation of hemostasis (GO:1900047)	0.000481478	0.00263934	APOE;KNG1
peptidyl-methionine modification (GO:0018206)	0.000481478	0.00263934	APOA2;APOA1
regulation of plasminogen activation (GO:0010755)	0.000481478	0.00263934	F12;SERPINF2
regulation of phagocytosis (GO:0050764)	0.000545532	0.0029688	AHSG;APOA2;APOA1
positive regulation of fatty acid biosynthetic process (GO:0045723)	0.000568016	0.00306892	APOA1;APOA4
response to reactive oxygen species (GO:0000302)	0.000573641	0.00307718	HP;APOD;APOE
negative regulation of cell activation (GO:0050866)	0.000661518	0.00349859	APOE;F2
negative regulation of coagulation (GO:0050819)	0.000661518	0.00349859	APOE;KNG1
lipid homeostasis (GO:0055088)	0.000728085	0.00382372	APOA1;APOA4;APOE
acute-phase response (GO:0006953)	0.000761945	0.00397375	ITIH4;AHSG
extracellular matrix disassembly (GO:0022617)	0.000796565	0.0040974	GSN;A2M;KLKB1
cellular component disassembly (GO:0022411)	0.000796565	0.0040974	GSN;A2M;KLKB1
positive regulation of collagen biosynthetic process (GO:0032967)	0.00086926	0.0043813	SERPINF2;F2
negative regulation of platelet activation (GO:0010544)	0.00086926	0.0043813	APOE;F2
killing by host of symbiont cells (GO:0051873)	0.00086926	0.0043813	F2;HRG
positive regulation of protein transport (GO:0051222)	0.000906753	0.00453981	FGB;FGA;FGG
positive regulation of MAPK cascade (GO:0043410)	0.000925229	0.00460163	FGB;FGA;FGG;SERPINF2;APOE
negative regulation of cytokine production involved in immune response (GO:0002719)	0.000983426	0.00480503	APOA2;APOA1
positive regulation of collagen metabolic process (GO:0010714)	0.000983426	0.00480503	SERPINF2;F2
response to metal ion (GO:0010038)	0.000985319	0.00480503	FGB;FGA;FGG
positive regulation of protein secretion (GO:0050714)	0.00102617	0.00494007	FGB;FGA;FGG
positive regulation of secretion by cell (GO:1903532)	0.00102617	0.00494007	FGB;FGA;FGG
regulation of transforming growth factor beta production (GO:0071634)	0.00110441	0.00518258	SERPINF2;FN1
positive regulation of fatty acid metabolic process (GO:0045923)	0.00110441	0.00518258	APOA1;APOA4
positive regulation of macrophage derived foam cell differentiation (GO:0010744)	0.00110441	0.00518258	APOB;AGT
nitric oxide mediated signal transduction (GO:0007263)	0.00110441	0.00518258	APOE;AGT
regulation of peptide hormone secretion (GO:0090276)	0.00111104	0.00518258	FGB;FGA;FGG
negative regulation of cytokine production involved in inflammatory response (GO:1900016)	0.00123216	0.0056424	APOD;F2
regulation of collagen biosynthetic process (GO:0032965)	0.00123216	0.0056424	SERPINF2;F2
positive regulation of triglyceride metabolic process (GO:0090208)	0.00123216	0.0056424	APOA1;APOA4
regulation of acute inflammatory response (GO:0002673)	0.00136666	0.00622037	F12;KLKB1
negative regulation of extrinsic apoptotic signaling pathway (GO:2001237)	0.00139189	0.00625933	FGB;FGA;FGG
glycerophospholipid metabolic process (GO:0006650)	0.00139189	0.00625933	PON1;APOA1;APOA4
innate immune response (GO:0045087)	0.00142498	0.00636999	SIGLEC16;IGLL5;F12;APOA4;JCHAIN
regulation of lipoprotein lipase activity (GO:0051004)	0.00150786	0.0067006	APOA1;APOA4
endoplasmic reticulum to Golgi vesicle-mediated transport (GO:0006888)	0.00167285	0.00739008	SPTBN4;SERPINA1;F2;F5
negative regulation of lipid metabolic process (GO:0045833)	0.00197131	0.0086073	APOA2;APOD
regulation of cytokine production involved in immune response (GO:0002718)	0.00197131	0.0086073	APOA2;APOA1
neutrophil degranulation (GO:0043312)	0.00200578	0.00870715	SERPINA1;TTR;GSN;AHSG;HP;ORM2
neutrophil activation involved in immune response (GO:0002283)	0.0020909	0.00902451	SERPINA1;TTR;GSN;AHSG;HP;ORM2
neutrophil mediated immunity (GO:0002446)	0.00215652	0.00925455	SERPINA1;TTR;GSN;AHSG;HP;ORM2
negative regulation of cellular protein metabolic process (GO:0032269)	0.00221012	0.00943069	APOE;F2;KNG1
positive regulation of cytokine production (GO:0001819)	0.00224256	0.00951504	SIGLEC16;SERPINF2;APOA2;ORM2;AGT
regulation of inflammatory response (GO:0050727)	0.00247309	0.0104342	AHSG;APOA1;APOE;AGT
positive regulation of multicellular organismal process (GO:0051240)	0.00254686	0.0106854	FGB;FGA;FGG;APOE;AGT
positive regulation of fibroblast proliferation (GO:0048146)	0.0026809	0.0111853	FN1;AGT
negative regulation of multicellular organismal process (GO:0051241)	0.00283713	0.011732	PON1;APOA2;APOA1;APOA4
regulation of fatty acid biosynthetic process (GO:0042304)	0.00287442	0.011732	APOA1;APOA4
negative regulation of wound healing (GO:0061045)	0.00287442	0.011732	APOE;KNG1
transition metal ion homeostasis (GO:0055076)	0.00287442	0.011732	TF;CP
plasma membrane invagination (GO:0099024)	0.00307432	0.0124801	IGLL5;GSN
response to calcium ion (GO:0051592)	0.00319136	0.0128856	FGB;FGA;FGG
regulation of macrophage derived foam cell differentiation (GO:0010743)	0.00328057	0.0131048	APOB;AGT
vitamin transport (GO:0051180)	0.00328057	0.0131048	APOA1;GC
lipid transport (GO:0006869)	0.00336242	0.0133607	APOA1;APOA4;APOE
phosphatidylcholine biosynthetic process (GO:0006656)	0.00371196	0.014672	APOA2;APOA1
negative regulation of blood vessel endothelial cell migration (GO:0043537)	0.00393703	0.0153995	APOE;HRG
secondary alcohol biosynthetic process (GO:1902653)	0.00393703	0.0153995	APOA1;APOA4
regulation of protein-containing complex assembly (GO:0043254)	0.00400503	0.0155843	GSN;APOE;HRG
blood vessel diameter maintenance (GO:0097746)	0.0041683	0.0160533	SERPINF2;AGT
cholesterol biosynthetic process (GO:0006695)	0.0041683	0.0160533	APOA1;APOA4
transition metal ion transport (GO:0000041)	0.00440575	0.0168812	TF;CP
phagocytosis, engulfment (GO:0006911)	0.00464933	0.0177241	IGLL5;GSN
negative regulation of endothelial cell migration (GO:0010596)	0.00489901	0.0183958	APOE;HRG
negative regulation of innate immune response (GO:0045824)	0.00489901	0.0183958	SERPING1;A2M
sterol biosynthetic process (GO:0016126)	0.00489901	0.0183958	APOA1;APOA4
synapse organization (GO:0050808)	0.00504504	0.0188499	C1QB;C1QA;C1QC
positive regulation of wound healing (GO:0090303)	0.00541655	0.0201378	F12;F2
regulation of response to external stimulus (GO:0032101)	0.00550243	0.0203563	AHSG;F2;HRG
acylglycerol metabolic process (GO:0006639)	0.00568433	0.0209261	APOA2;APOE
regulation of protein phosphorylation (GO:0001932)	0.00613159	0.0224141	SPTBN4;FN1;F2;HRG
negative regulation of signal transduction (GO:0009968)	0.00621232	0.0224141	AHSG;APOD;HRG;AGT
organic substance transport (GO:0071702)	0.00623398	0.0224141	APOA1;APOA4;HRG
regulation of cytokine production involved in inflammatory response (GO:1900015)	0.00623776	0.0224141	APOD;F2
negative regulation of proteolysis (GO:0045861)	0.00623776	0.0224141	F2;KNG1
positive regulation of stress fiber assembly (GO:0051496)	0.00652334	0.0233287	SERPINF2;APOA1
regulation of cellular component organization (GO:0051128)	0.00662051	0.023564	APOE;HRG;AGT
positive regulation of cellular catabolic process (GO:0031331)	0.00688597	0.0243932	APOA1;APOA4;APOE
regulation of fibroblast proliferation (GO:0048145)	0.00711206	0.0250759	FN1;AGT
positive regulation of cellular process (GO:0048522)	0.00719214	0.0252397	AHSG;SERPINF2;HP;APOA2;FN1;APOA1
regulation of wound healing (GO:0061041)	0.00741514	0.0259012	F2;HRG
positive regulation of endocytosis (GO:0045807)	0.00772398	0.0267314	TF;APOE
negative regulation of MAP kinase activity (GO:0043407)	0.00772398	0.0267314	APOE;AGT
regulation of smooth muscle cell proliferation (GO:0048660)	0.00803855	0.0274407	SERPINF2;APOD
regulation of cellular protein metabolic process (GO:0032268)	0.00803855	0.0274407	APOE;AGT
positive regulation of reactive oxygen species metabolic process (GO:2000379)	0.00803855	0.0274407	F2;AGT
iron ion transport (GO:0006826)	0.00835883	0.0284049	TF;CP
positive regulation of actin filament bundle assembly (GO:0032233)	0.00868477	0.0293796	SERPINF2;APOA1
organonitrogen compound biosynthetic process (GO:1901566)	0.00939885	0.0316526	APOA2;APOA1;APOE
regulation of proteolysis (GO:0030162)	0.00969629	0.0323641	F2;KNG1
regulation of focal adhesion assembly (GO:0051893)	0.00969629	0.0323641	APOD;HRG
regulation of blood vessel endothelial cell migration (GO:0043535)	0.0100446	0.0333782	APOE;HRG
regulation of reactive oxygen species metabolic process (GO:2000377)	0.0107577	0.0354342	F2;AGT
positive regulation of cell junction assembly (GO:1901890)	0.0107577	0.0354342	HRG;AGT
cellular protein-containing complex assembly (GO:0034622)	0.0110964	0.036317	FGB;FGA;FGG
cellular iron ion homeostasis (GO:0006879)	0.0111224	0.036317	TF;CP
iron ion homeostasis (GO:0055072)	0.0122489	0.0398222	TF;CP
defense response to bacterium (GO:0042742)	0.012574	0.040703	IGLL5;TF;JCHAIN
COPII vesicle coating (GO:0048208)	0.0130265	0.0416295	SERPINA1;F5
vesicle coating (GO:0006901)	0.0130265	0.0416295	SERPINA1;F5
vesicle targeting, rough ER to cis-Golgi (GO:0048207)	0.0130265	0.0416295	SERPINA1;F5
antimicrobial humoral immune response mediated by antimicrobial peptide (GO:0061844)	0.0134233	0.0417502	F2;HRG
regulation of sterol transport (GO:0032371)	0.0136758	0.0417502	APOA4
negative regulation of cholesterol biosynthetic process (GO:0045541)	0.0136758	0.0417502	APOE
negative regulation of cholesterol metabolic process (GO:0090206)	0.0136758	0.0417502	APOE
negative regulation of hydrogen peroxide metabolic process (GO:0010727)	0.0136758	0.0417502	HP
negative regulation of macrophage differentiation (GO:0045650)	0.0136758	0.0417502	C1QC
negative regulation of plasminogen activation (GO:0010757)	0.0136758	0.0417502	SERPINF2
negative regulation of sterol biosynthetic process (GO:0106119)	0.0136758	0.0417502	APOE
negative regulation of T cell migration (GO:2000405)	0.0136758	0.0417502	APOD
regulation of low-density lipoprotein particle receptor catabolic process (GO:0032803)	0.0136758	0.0417502	APOE
regulation of plasma membrane organization (GO:1903729)	0.0136758	0.0417502	GSN
positive regulation of cell death (GO:0010942)	0.0142324	0.0432733	C1QA;HP
COPII-coated vesicle budding (GO:0090114)	0.0159123	0.0471573	SERPINA1;F5
negative regulation of astrocyte differentiation (GO:0048712)	0.0163889	0.0471573	F2
positive regulation of cholesterol storage (GO:0010886)	0.0163889	0.0471573	APOB
regulation of blood vessel remodeling (GO:0060312)	0.0163889	0.0471573	HRG
positive regulation of gap junction assembly (GO:1903598)	0.0163889	0.0471573	AGT
negative regulation of lamellipodium organization (GO:1902744)	0.0163889	0.0471573	HRG
positive regulation of immune response to tumor cell (GO:0002839)	0.0163889	0.0471573	HRG
cellular response to iron ion (GO:0071281)	0.0163889	0.0471573	TF
positive regulation of plasminogen activation (GO:0010756)	0.0163889	0.0471573	F12
sterol import (GO:0035376)	0.0163889	0.0471573	APOA1
cholesterol import (GO:0070508)	0.0163889	0.0471573	APOA1
regulation of keratinocyte apoptotic process (GO:1902172)	0.0163889	0.0471573	GSN
neurotransmitter-gated ion channel clustering (GO:0072578)	0.0163889	0.0471573	APOE
negative regulation of actin filament depolymerization (GO:0030835)	0.0163889	0.0471573	GSN
regulation of Rho protein signal transduction (GO:0035023)	0.0172253	0.0491871	APOA1;APOE
negative regulation of cell adhesion (GO:0007162)	0.0172253	0.0491871	HRG;KNG1
regulation of stress fiber assembly (GO:0051492)	0.0176729	0.0502741	SERPINF2;APOA1
positive regulation of immune response (GO:0050778)	0.0181255	0.0508512	SIGLEC16;HRG
integrin-mediated signaling pathway (GO:0007229)	0.0181255	0.0508512	FN1;APOA1
protein transport (GO:0015031)	0.0185796	0.0508512	TF;FGG;APOE;APOB
positive regulation of phosphatidylinositol 3-kinase signaling (GO:0014068)	0.0190452	0.0508512	FN1;AGT
positive regulation of activation of Janus kinase activity (GO:0010536)	0.0190946	0.0508512	AGT
positive regulation of amyloid-beta clearance (GO:1900223)	0.0190946	0.0508512	APOE
purine-containing compound metabolic process (GO:0072521)	0.0190946	0.0508512	TTR
negative regulation of heart rate (GO:0010459)	0.0190946	0.0508512	SPTBN4
heme transport (GO:0015886)	0.0190946	0.0508512	HRG
regulation of defense response to bacterium (GO:1900424)	0.0190946	0.0508512	SIGLEC16
negative regulation of protein import (GO:1904590)	0.0190946	0.0508512	APOD
negative regulation of protein import into nucleus (GO:0042308)	0.0190946	0.0508512	APOD
regulation of extracellular matrix assembly (GO:1901201)	0.0190946	0.0508512	AGT
iron coordination entity transport (GO:1901678)	0.0190946	0.0508512	HRG
positive regulation of receptor catabolic process (GO:2000646)	0.0190946	0.0508512	APOE
positive regulation of respiratory burst (GO:0060267)	0.0190946	0.0508512	JCHAIN
regulation of NAD(P)H oxidase activity (GO:0033860)	0.0190946	0.0508512	AGT
regulation of neurotrophin TRK receptor signaling pathway (GO:0051386)	0.0190946	0.0508512	AGT
negative regulation of protein serine/threonine kinase activity (GO:0071901)	0.0195124	0.0517802	APOE;AGT
regulation of ion transport (GO:0043269)	0.0199843	0.0528458	SPTBN4;TF
actin filament reorganization (GO:0090527)	0.021793	0.0554264	GSN
regulation of activation of Janus kinase activity (GO:0010533)	0.021793	0.0554264	AGT
positive regulation of cysteine-type endopeptidase activity involved in apoptotic signaling pathway (GO:2001269)	0.021793	0.0554264	GSN
aromatic compound catabolic process (GO:0019439)	0.021793	0.0554264	PON1
positive regulation of defense response to bacterium (GO:1900426)	0.021793	0.0554264	SIGLEC16
negative regulation of long-term synaptic potentiation (GO:1900272)	0.021793	0.0554264	APOE
response to hydroperoxide (GO:0033194)	0.021793	0.0554264	APOA4
regulation of dendritic spine maintenance (GO:1902950)	0.021793	0.0554264	APOE
integrin activation (GO:0033622)	0.021793	0.0554264	FN1
regulation of extent of cell growth (GO:0061387)	0.021793	0.0554264	APOE
regulation of nitrogen compound metabolic process (GO:0051171)	0.021793	0.0554264	APOE
regulation of defense response (GO:0031347)	0.0219196	0.0554264	AHSG;APOE
regulation of interleukin-1 beta production (GO:0032651)	0.0219196	0.0554264	APOA1;ORM2
negative regulation of defense response (GO:0031348)	0.0229154	0.0577498	APOA1;APOE
epithelial cell apoptotic process (GO:1904019)	0.0244842	0.0585593	GSN
actin-mediated cell contraction (GO:0070252)	0.0244842	0.0585593	GSN
regulation of respiratory burst (GO:0060263)	0.0244842	0.0585593	JCHAIN
purine nucleobase metabolic process (GO:0006144)	0.0244842	0.0585593	TTR
positive regulation of cell-cell adhesion mediated by cadherin (GO:2000049)	0.0244842	0.0585593	SERPINF2
glomerular filtration (GO:0003094)	0.0244842	0.0585593	JCHAIN
negative regulation of glial cell differentiation (GO:0045686)	0.0244842	0.0585593	F2
axon regeneration (GO:0031103)	0.0244842	0.0585593	APOD
regulation of cell adhesion molecule production (GO:0060353)	0.0244842	0.0585593	APOA1
negative regulation of lipase activity (GO:0060192)	0.0244842	0.0585593	APOA2
response to misfolded protein (GO:0051788)	0.0244842	0.0585593	F12
regulation of gap junction assembly (GO:1903596)	0.0244842	0.0585593	AGT
sterol catabolic process (GO:0016127)	0.0244842	0.0585593	APOE
cholesterol catabolic process (GO:0006707)	0.0244842	0.0585593	APOE
neuronal ion channel clustering (GO:0045161)	0.0244842	0.0585593	SPTBN4
organic acid catabolic process (GO:0016054)	0.0244842	0.0585593	PON1
regulation of endothelial cell migration (GO:0010594)	0.0249619	0.0593241	APOE;AGT
second-messenger-mediated signaling (GO:0019932)	0.0249619	0.0593241	APOE;AGT
positive regulation of binding (GO:0051099)	0.0254849	0.0603759	PON1;APOE
regulation of peptidyl-tyrosine phosphorylation (GO:0050730)	0.0265442	0.0612708	HRG;AGT
negative regulation of cell adhesion mediated by integrin (GO:0033629)	0.027168	0.0612708	HRG
negative regulation of heterotypic cell-cell adhesion (GO:0034115)	0.027168	0.0612708	APOA1
removal of superoxide radicals (GO:0019430)	0.027168	0.0612708	APOA4
renal filtration (GO:0097205)	0.027168	0.0612708	JCHAIN
regulation of cell activation (GO:0050865)	0.027168	0.0612708	HRG
regulation of cell-cell adhesion involved in gastrulation (GO:0070587)	0.027168	0.0612708	APOA1
sequestering of actin monomers (GO:0042989)	0.027168	0.0612708	GSN
regulation of granulocyte differentiation (GO:0030852)	0.027168	0.0612708	C1QC
negative regulation of transforming growth factor beta production (GO:0071635)	0.027168	0.0612708	FN1
lipoprotein transport (GO:0042953)	0.027168	0.0612708	APOB
negative regulation of vascular endothelial growth factor signaling pathway (GO:1900747)	0.027168	0.0612708	HRG
neuron remodeling (GO:0016322)	0.027168	0.0612708	C1QA
positive regulation of tissue remodeling (GO:0034105)	0.027168	0.0612708	HRG
regulation of podosome assembly (GO:0071801)	0.027168	0.0612708	GSN
pinocytosis (GO:0006907)	0.027168	0.0612708	AHSG
negative regulation of MAPK cascade (GO:0043409)	0.0276211	0.0621062	APOE;AGT
cellular transition metal ion homeostasis (GO:0046916)	0.0287155	0.0631361	TF;CP
regulation of MAP kinase activity (GO:0043405)	0.0292691	0.0631361	APOE;AGT
positive regulation of defense response (GO:0031349)	0.0298271	0.0631361	SIGLEC16;AGT
positive regulation of actin nucleation (GO:0051127)	0.0298446	0.0631361	GSN
actin filament depolymerization (GO:0030042)	0.0298446	0.0631361	GSN
alcohol catabolic process (GO:0046164)	0.0298446	0.0631361	APOE
fatty acid homeostasis (GO:0055089)	0.0298446	0.0631361	APOE
negative regulation of cholesterol transport (GO:0032375)	0.0298446	0.0631361	APOA2
negative regulation of lymphocyte migration (GO:2000402)	0.0298446	0.0631361	APOD
regulation of cysteine-type endopeptidase activity involved in apoptotic signaling pathway (GO:2001267)	0.0298446	0.0631361	GSN
positive regulation of lipid localization (GO:1905954)	0.0298446	0.0631361	APOB
negative regulation of platelet-derived growth factor receptor signaling pathway (GO:0010642)	0.0298446	0.0631361	APOD
negative regulation of response to cytokine stimulus (GO:0060761)	0.0298446	0.0631361	APOA1
cellular response to superoxide (GO:0071451)	0.0298446	0.0631361	APOA4
lipoprotein biosynthetic process (GO:0042158)	0.0298446	0.0631361	APOE
lipoprotein catabolic process (GO:0042159)	0.0298446	0.0631361	APOE
lipoprotein localization (GO:0044872)	0.0298446	0.0631361	APOB
regulation of lipid kinase activity (GO:0043550)	0.0298446	0.0631361	F2
regulation of monocyte chemotactic protein-1 production (GO:0071637)	0.0298446	0.0631361	APOD
positive regulation of transforming growth factor beta production (GO:0071636)	0.0298446	0.0631361	SERPINF2
positive regulation by host of viral process (GO:0044794)	0.0298446	0.0631361	APOE
positive regulation of branching involved in ureteric bud morphogenesis (GO:0090190)	0.032514	0.0665342	AGT
negative regulation of cellular response to vascular endothelial growth factor stimulus (GO:1902548)	0.032514	0.0665342	HRG
regulation of actin nucleation (GO:0051125)	0.032514	0.0665342	GSN
regulation of amyloid precursor protein catabolic process (GO:1902991)	0.032514	0.0665342	APOE
regulation of astrocyte differentiation (GO:0048710)	0.032514	0.0665342	F2
negative regulation of heart contraction (GO:0045822)	0.032514	0.0665342	SPTBN4
carboxylic acid catabolic process (GO:0046395)	0.032514	0.0665342	PON1
negative regulation of oxidoreductase activity (GO:0051354)	0.032514	0.0665342	HP
very-low-density lipoprotein particle assembly (GO:0034379)	0.032514	0.0665342	APOB
modulation by host of viral process (GO:0044788)	0.032514	0.0665342	APOE
phospholipid homeostasis (GO:0055091)	0.032514	0.0665342	APOA1
negative regulation of amyloid fibril formation (GO:1905907)	0.032514	0.0665342	APOE
positive regulation of cell differentiation (GO:0045597)	0.0340501	0.0694881	SERPINF2;APOB;AGT
regulation of phosphatidylinositol 3-kinase signaling (GO:0014066)	0.0344413	0.0695193	FN1;AGT
cellular component assembly (GO:0022607)	0.0350559	0.0695193	FGA;GSN;JCHAIN
relaxation of cardiac muscle (GO:0055119)	0.0351762	0.0695193	GSN
response to iron ion (GO:0010039)	0.0351762	0.0695193	TF
negative regulation of nucleocytoplasmic transport (GO:0046823)	0.0351762	0.0695193	APOD
positive regulation of lipid transport (GO:0032370)	0.0351762	0.0695193	APOE
central nervous system neuron axonogenesis (GO:0021955)	0.0351762	0.0695193	SPTBN4
central nervous system projection neuron axonogenesis (GO:0021952)	0.0351762	0.0695193	SPTBN4
positive regulation of transporter activity (GO:0032411)	0.0351762	0.0695193	PON1
regulation of oxidoreductase activity (GO:0051341)	0.0351762	0.0695193	HP
regulation of platelet-derived growth factor receptor signaling pathway (GO:0010640)	0.0351762	0.0695193	APOD
negative regulation of alcohol biosynthetic process (GO:1902931)	0.0351762	0.0695193	APOE
central nervous system development (GO:0007417)	0.0374625	0.0736042	C1QA;GSN;APOD
negative regulation of bone mineralization (GO:0030502)	0.0378312	0.0736042	AHSG
relaxation of muscle (GO:0090075)	0.0378312	0.0736042	GSN
renal absorption (GO:0070293)	0.0378312	0.0736042	GSN
cGMP-mediated signaling (GO:0019934)	0.0378312	0.0736042	APOE
regulation of lipase activity (GO:0060191)	0.0378312	0.0736042	APOA2
protein-containing complex subunit organization (GO:0043933)	0.0380725	0.0738823	FGA;JCHAIN
positive regulation of protein metabolic process (GO:0051247)	0.0399409	0.0763812	APOE;AGT
regulation of amyloid fibril formation (GO:1905906)	0.040479	0.0763812	APOE
regulation of branching involved in ureteric bud morphogenesis (GO:0090189)	0.040479	0.0763812	AGT
response to muscle stretch (GO:0035994)	0.040479	0.0763812	GSN
positive regulation of membrane protein ectodomain proteolysis (GO:0051044)	0.040479	0.0763812	APOE
regulation of endothelial cell chemotaxis (GO:2001026)	0.040479	0.0763812	HRG
negative regulation of protein processing (GO:0010955)	0.040479	0.0763812	SERPINF2
regulation of extracellular matrix organization (GO:1903053)	0.040479	0.0763812	AGT
lipoxygenase pathway (GO:0019372)	0.040479	0.0763812	PON1
regulation of macrophage differentiation (GO:0045649)	0.040479	0.0763812	C1QC
vitamin D metabolic process (GO:0042359)	0.040479	0.0763812	GC
negative regulation of response to external stimulus (GO:0032102)	0.0418436	0.0787582	APOA1;APOE
negative regulation of cell-substrate junction organization (GO:0150118)	0.0431197	0.0795648	APOD
regulation of amyloid-beta clearance (GO:1900221)	0.0431197	0.0795648	APOE
negative regulation of focal adhesion assembly (GO:0051895)	0.0431197	0.0795648	APOD
heme catabolic process (GO:0042167)	0.0431197	0.0795648	ALB
regulation of cholesterol storage (GO:0010885)	0.0431197	0.0795648	APOB
regulation of establishment of cell polarity (GO:2000114)	0.0431197	0.0795648	GSN
regulation of interleukin-1 production (GO:0032652)	0.0431197	0.0795648	ORM2
porphyrin-containing compound catabolic process (GO:0006787)	0.0431197	0.0795648	ALB
negative regulation of chemokine production (GO:0032682)	0.0457532	0.0831977	APOD
regulation of cholesterol biosynthetic process (GO:0045540)	0.0457532	0.0831977	APOE
positive regulation of muscle hypertrophy (GO:0014742)	0.0457532	0.0831977	AGT
negative regulation of viral entry into host cell (GO:0046597)	0.0457532	0.0831977	GSN
protein autoprocessing (GO:0016540)	0.0457532	0.0831977	F12
negative regulation of amyloid-beta formation (GO:1902430)	0.0457532	0.0831977	APOE
positive regulation of cardiac muscle hypertrophy (GO:0010613)	0.0483796	0.0865073	AGT
amyloid precursor protein metabolic process (GO:0042982)	0.0483796	0.0865073	APOE
response to axon injury (GO:0048678)	0.0483796	0.0865073	APOD
negative regulation of lipid catabolic process (GO:0050995)	0.0483796	0.0865073	APOA2
positive regulation of nitric-oxide synthase activity (GO:0051000)	0.0483796	0.0865073	APOE
negative regulation of tumor necrosis factor-mediated signaling pathway (GO:0010804)	0.0483796	0.0865073	APOA1
neuron maturation (GO:0042551)	0.0483796	0.0865073	C1QA
actin filament capping (GO:0051693)	0.0509989	0.0880464	GSN
positive regulation of cellular protein catabolic process (GO:1903364)	0.0509989	0.0880464	APOE
regulation of vascular endothelial growth factor signaling pathway (GO:1900746)	0.0509989	0.0880464	HRG
barbed-end actin filament capping (GO:0051016)	0.0509989	0.0880464	GSN
positive regulation of focal adhesion assembly (GO:0051894)	0.0509989	0.0880464	HRG
positive regulation of G protein-coupled receptor signaling pathway (GO:0045745)	0.0509989	0.0880464	F2
regulation of cell-cell adhesion mediated by cadherin (GO:2000047)	0.0509989	0.0880464	SERPINF2
cardiac muscle cell contraction (GO:0086003)	0.0509989	0.0880464	GSN
negative regulation of protein localization to nucleus (GO:1900181)	0.0509989	0.0880464	APOD
positive regulation of oxidoreductase activity (GO:0051353)	0.0509989	0.0880464	AGT
long-term memory (GO:0007616)	0.0509989	0.0880464	APOE
synaptic transmission, cholinergic (GO:0007271)	0.0509989	0.0880464	APOE
mitochondrion localization (GO:0051646)	0.0509989	0.0880464	ALB
postsynaptic membrane organization (GO:0001941)	0.0509989	0.0880464	APOE
negative regulation of amyloid precursor protein catabolic process (GO:1902992)	0.0509989	0.0880464	APOE
regulation of cell adhesion (GO:0030155)	0.0518486	0.089308	HRG;KNG1
fatty acid transport (GO:0015908)	0.0536111	0.0917129	APOE
regulation of T cell migration (GO:2000404)	0.0536111	0.0917129	APOD
negative regulation of viral life cycle (GO:1903901)	0.0536111	0.0917129	GSN
autonomic nervous system development (GO:0048483)	0.0562163	0.0946602	FN1
regulation of cholesterol metabolic process (GO:0090181)	0.0562163	0.0946602	APOE
hydrogen peroxide catabolic process (GO:0042744)	0.0562163	0.0946602	APOA4
positive regulation of lipid storage (GO:0010884)	0.0562163	0.0946602	APOB
regulation of dendritic spine development (GO:0060998)	0.0562163	0.0946602	APOE
innate immune response in mucosa (GO:0002227)	0.0562163	0.0946602	APOA4
regulation of lipid catabolic process (GO:0050994)	0.0562163	0.0946602	APOA2
negative regulation of biomineral tissue development (GO:0070168)	0.0588144	0.0972899	AHSG
regulation of response to cytokine stimulus (GO:0060759)	0.0588144	0.0972899	APOA1
positive regulation of dendritic spine development (GO:0060999)	0.0588144	0.0972899	APOE
heme biosynthetic process (GO:0006783)	0.0588144	0.0972899	ALB
cell projection assembly (GO:0030031)	0.0588144	0.0972899	GSN
regulation of lipid storage (GO:0010883)	0.0588144	0.0972899	APOB
regulation of membrane protein ectodomain proteolysis (GO:0051043)	0.0588144	0.0972899	APOE
microglial cell activation (GO:0001774)	0.0588144	0.0972899	C1QA
ERK1 and ERK2 cascade (GO:0070371)	0.0614055	0.100034	APOA1
regulation of steroid metabolic process (GO:0019218)	0.0614055	0.100034	APOE
regulation of supramolecular fiber organization (GO:1902903)	0.0614055	0.100034	APOE
positive regulation of epithelial cell apoptotic process (GO:1904037)	0.0614055	0.100034	GSN
negative regulation of intracellular protein transport (GO:0090317)	0.0614055	0.100034	APOD
positive regulation of morphogenesis of an epithelium (GO:1905332)	0.0614055	0.100034	AGT
diacylglycerol metabolic process (GO:0046339)	0.0614055	0.100034	APOA2
regulation of cytosolic calcium ion concentration (GO:0051480)	0.0626146	0.101783	F2;KNG1
positive regulation of cell-substrate junction organization (GO:0150117)	0.0639896	0.102684	HRG
regulation of cardiac muscle hypertrophy (GO:0010611)	0.0639896	0.102684	AGT
negative regulation of ossification (GO:0030279)	0.0639896	0.102684	AHSG
defense response to fungus (GO:0050832)	0.0639896	0.102684	HRG
phospholipid catabolic process (GO:0009395)	0.0639896	0.102684	APOA2
porphyrin-containing compound biosynthetic process (GO:0006779)	0.0639896	0.102684	ALB
regulation of proteolysis involved in cellular protein catabolic process (GO:1903050)	0.0665667	0.105468	APOE
negative regulation of cell junction assembly (GO:1901889)	0.0665667	0.105468	APOD
fat-soluble vitamin metabolic process (GO:0006775)	0.0665667	0.105468	GC
positive regulation of ERBB signaling pathway (GO:1901186)	0.0665667	0.105468	AGT
response to hexose (GO:0009746)	0.0665667	0.105468	APOA2
negative regulation of actin filament polymerization (GO:0030837)	0.0665667	0.105468	GSN
regulation of biomineral tissue development (GO:0070167)	0.0691369	0.108851	AHSG
negative regulation of interleukin-1 beta production (GO:0032691)	0.0691369	0.108851	APOA1
negative regulation of protein transport (GO:0051224)	0.0691369	0.108851	APOE
negative regulation of catalytic activity (GO:0043086)	0.0717001	0.111715	HP
positive regulation of calcium ion transmembrane transport (GO:1904427)	0.0717001	0.111715	F2
negative regulation of insulin receptor signaling pathway (GO:0046627)	0.0717001	0.111715	AHSG
negative regulation of plasma membrane bounded cell projection assembly (GO:0120033)	0.0717001	0.111715	HRG
cellular lipid catabolic process (GO:0044242)	0.0717001	0.111715	APOA2
regulation of small molecule metabolic process (GO:0062012)	0.0742564	0.114042	APOE
negative regulation of cellular response to insulin stimulus (GO:1900077)	0.0742564	0.114042	AHSG
regulation of B cell activation (GO:0050864)	0.0742564	0.114042	IGLL5
positive regulation of monooxygenase activity (GO:0032770)	0.0742564	0.114042	APOE
leukocyte cell-cell adhesion (GO:0007159)	0.0742564	0.114042	APOA4
mucosal immune response (GO:0002385)	0.0742564	0.114042	APOA4
protein depolymerization (GO:0051261)	0.0742564	0.114042	GSN
actin filament polymerization (GO:0030041)	0.0768057	0.116527	GSN
positive regulation of extrinsic apoptotic signaling pathway (GO:2001238)	0.0768057	0.116527	AGT
negative regulation of myeloid leukocyte differentiation (GO:0002762)	0.0768057	0.116527	C1QC
hydrogen peroxide metabolic process (GO:0042743)	0.0768057	0.116527	APOA4
lipid catabolic process (GO:0016042)	0.0768057	0.116527	APOA4
regulation of neuronal synaptic plasticity (GO:0048168)	0.0768057	0.116527	APOE
negative regulation of interleukin-1 production (GO:0032692)	0.0793482	0.119181	APOA1
positive regulation of lipid kinase activity (GO:0090218)	0.0793482	0.119181	F2
cell projection organization (GO:0030030)	0.0793482	0.119181	GSN
regulation of long-term synaptic potentiation (GO:1900271)	0.0793482	0.119181	APOE
regulation of protein localization to membrane (GO:1905475)	0.0793482	0.119181	GSN
regulation of developmental growth (GO:0048638)	0.0818838	0.122256	APOE
positive regulation of Rho protein signal transduction (GO:0035025)	0.0818838	0.122256	APOA1
peptide cross-linking (GO:0018149)	0.0818838	0.122256	FN1
negative regulation of cell-matrix adhesion (GO:0001953)	0.0844125	0.124546	APOD
negative regulation of chemotaxis (GO:0050922)	0.0844125	0.124546	HRG
long-chain fatty acid transport (GO:0015909)	0.0844125	0.124546	APOE
superoxide metabolic process (GO:0006801)	0.0844125	0.124546	APOA4
positive regulation of receptor signaling pathway via STAT (GO:1904894)	0.0844125	0.124546	F2
endodermal cell differentiation (GO:0035987)	0.0844125	0.124546	FN1
positive regulation of developmental process (GO:0051094)	0.0853096	0.125377	SERPINF2;APOE
glycerophospholipid biosynthetic process (GO:0046474)	0.0853096	0.125377	APOA2;APOA1
negative regulation of smooth muscle cell proliferation (GO:0048662)	0.0869344	0.126804	APOD
positive regulation of receptor signaling pathway via JAK-STAT (GO:0046427)	0.0869344	0.126804	F2
negative chemotaxis (GO:0050919)	0.0869344	0.126804	APOA1
protein stabilization (GO:0050821)	0.0869564	0.126804	APOA2;APOA1
positive regulation of cellular biosynthetic process (GO:0031328)	0.0877834	0.127712	APOA1;APOA4
positive regulation of calcium ion transport into cytosol (GO:0010524)	0.0894495	0.127712	F2
regulation of amyloid-beta formation (GO:1902003)	0.0894495	0.127712	APOE
positive regulation of epidermal growth factor receptor signaling pathway (GO:0045742)	0.0894495	0.127712	AGT
B cell receptor signaling pathway (GO:0050853)	0.0894495	0.127712	IGLL5
regulation of cell adhesion mediated by integrin (GO:0033628)	0.0894495	0.127712	HRG
cardiac muscle contraction (GO:0060048)	0.0894495	0.127712	GSN
cell-substrate junction assembly (GO:0007044)	0.0894495	0.127712	FN1
positive regulation of release of sequestered calcium ion into cytosol (GO:0051281)	0.0894495	0.127712	F2
regulation of lamellipodium assembly (GO:0010591)	0.0894495	0.127712	HRG
protein destabilization (GO:0031648)	0.0894495	0.127712	GSN
acylglycerol catabolic process (GO:0046464)	0.0919578	0.130302	APOA2
negative regulation of epithelial cell migration (GO:0010633)	0.0919578	0.130302	APOE
regulation of blood circulation (GO:1903522)	0.0919578	0.130302	AGT
positive regulation of lymphocyte activation (GO:0051251)	0.0919578	0.130302	IGLL5
regulation of sodium ion transport (GO:0002028)	0.0944592	0.132102	SPTBN4
macrophage activation (GO:0042116)	0.0944592	0.132102	C1QA
transferrin transport (GO:0033572)	0.0944592	0.132102	TF
cyclic-nucleotide-mediated signaling (GO:0019935)	0.0944592	0.132102	APOE
regulation of ossification (GO:0030278)	0.0944592	0.132102	AHSG
endoderm formation (GO:0001706)	0.0944592	0.132102	FN1
regulation of protein import into nucleus (GO:0042306)	0.0944592	0.132102	APOD
negative regulation of endothelial cell proliferation (GO:0001937)	0.096954	0.135088	APOE
neural crest cell migration (GO:0001755)	0.096954	0.135088	FN1
regulation of axon extension (GO:0030516)	0.0994419	0.138268	APOE
regulation of programmed cell death (GO:0043067)	0.0996045	0.138268	ALB;AGT
regulation of protein tyrosine kinase activity (GO:0061097)	0.101923	0.139679	AGT
regulation of receptor-mediated endocytosis (GO:0048259)	0.101923	0.139679	TF
negative regulation of cellular metabolic process (GO:0031324)	0.101923	0.139679	APOE
regulation of viral entry into host cell (GO:0046596)	0.101923	0.139679	GSN
negative regulation of protein secretion (GO:0050709)	0.101923	0.139679	APOE
negative regulation of secretion by cell (GO:1903531)	0.101923	0.139679	APOE
regulation of nitric-oxide synthase activity (GO:0050999)	0.101923	0.139679	APOE
positive regulation of catalytic activity (GO:0043085)	0.104398	0.14255	APOA1
carboxylic acid metabolic process (GO:0019752)	0.104398	0.14255	PON1
regulation of macromolecule metabolic process (GO:0060255)	0.104802	0.142843	APOE;HRG
negative regulation of cell-cell adhesion (GO:0022408)	0.106866	0.144866	APOA1
hexose metabolic process (GO:0019318)	0.106866	0.144866	APOD
visual system development (GO:0150063)	0.106866	0.144866	C1QA
positive regulation of protein tyrosine kinase activity (GO:0061098)	0.109327	0.147936	AGT
positive regulation of cell-matrix adhesion (GO:0001954)	0.114229	0.154014	HRG
positive regulation of receptor-mediated endocytosis (GO:0048260)	0.114229	0.154014	TF
negative regulation of inflammatory response (GO:0050728)	0.115413	0.155332	APOA1;APOE
regulation of receptor signaling pathway via JAK-STAT (GO:0046425)	0.11667	0.156184	F2
regulation of insulin receptor signaling pathway (GO:0046626)	0.11667	0.156184	AHSG
positive regulation of response to biotic stimulus (GO:0002833)	0.11667	0.156184	SIGLEC16
establishment of protein localization to extracellular region (GO:0035592)	0.119105	0.158877	FGG
positive regulation of smooth muscle cell proliferation (GO:0048661)	0.119105	0.158877	SERPINF2
regulation of cell growth (GO:0001558)	0.119914	0.159673	HRG;AGT
positive regulation of neuron death (GO:1901216)	0.121533	0.161257	C1QA
regulation of protein localization to nucleus (GO:1900180)	0.121533	0.161257	F2
substrate adhesion-dependent cell spreading (GO:0034446)	0.123954	0.16389	FN1
regulation of protein metabolic process (GO:0051246)	0.123954	0.16389	APOE
negative regulation of catabolic process (GO:0009895)	0.126369	0.165337	APOA2
negative regulation of cell projection organization (GO:0031345)	0.126369	0.165337	APOE
response to glucose (GO:0009749)	0.126369	0.165337	APOA2
response to hydrogen peroxide (GO:0042542)	0.126369	0.165337	HP
regulation of cellular localization (GO:0060341)	0.126369	0.165337	GSN
positive regulation of actin filament polymerization (GO:0030838)	0.126369	0.165337	GSN
actin polymerization or depolymerization (GO:0008154)	0.128778	0.168195	GSN
regulation of protein modification process (GO:0031399)	0.13118	0.171035	FN1
regulation of release of sequestered calcium ion into cytosol (GO:0051279)	0.133575	0.173555	F2
negative regulation of protein metabolic process (GO:0051248)	0.133575	0.173555	APOE
positive regulation of B cell activation (GO:0050871)	0.135964	0.176354	IGLL5
regulation of proteasomal protein catabolic process (GO:0061136)	0.138346	0.179135	APOE
negative regulation of cytokine-mediated signaling pathway (GO:0001960)	0.140722	0.181585	APOA1
regulation of cardiac conduction (GO:1903779)	0.140722	0.181585	AGT
positive regulation of cell population proliferation (GO:0008284)	0.141511	0.182289	SERPINF2;FN1;AGT
membrane organization (GO:0061024)	0.143036	0.183382	TF;APOB
blood vessel morphogenesis (GO:0048514)	0.143092	0.183382	SERPINF2
positive regulation of interleukin-1 beta production (GO:0032731)	0.143092	0.183382	ORM2
regulation of bone mineralization (GO:0030500)	0.145455	0.185147	AHSG
renal system development (GO:0072001)	0.145455	0.185147	AGT
icosanoid metabolic process (GO:0006690)	0.145455	0.185147	PON1
positive regulation of proteolysis (GO:0045862)	0.145455	0.185147	APOE
regulation of apoptotic process (GO:0042981)	0.146612	0.186008	ALB;HRG;KNG1;AGT
positive regulation of gene expression (GO:0010628)	0.146627	0.186008	GSN;FN1;AGT
regulation of tumor necrosis factor-mediated signaling pathway (GO:0010803)	0.147812	0.186253	APOA1
negative regulation of hydrolase activity (GO:0051346)	0.147812	0.186253	APOA2
negative regulation of neuron projection development (GO:0010977)	0.147812	0.186253	APOE
positive regulation of protein binding (GO:0032092)	0.147812	0.186253	APOE
positive regulation of apoptotic signaling pathway (GO:2001235)	0.150162	0.188897	AGT
positive regulation of interleukin-8 production (GO:0032757)	0.154843	0.193812	APOA2
regulation of endocytosis (GO:0030100)	0.154843	0.193812	APOE
negative regulation of response to stimulus (GO:0048585)	0.154843	0.193812	APOA1
glucose metabolic process (GO:0006006)	0.157175	0.196077	APOD
positive regulation of interleukin-1 production (GO:0032732)	0.157175	0.196077	ORM2
actin cytoskeleton reorganization (GO:0031532)	0.1595	0.198318	GSN
positive regulation of Ras protein signal transduction (GO:0046579)	0.1595	0.198318	APOA1
protein secretion (GO:0009306)	0.161818	0.200207	FGG
regulation of extrinsic apoptotic signaling pathway (GO:2001236)	0.161818	0.200207	AGT
protein catabolic process (GO:0030163)	0.161818	0.200207	APOE
G protein-coupled receptor signaling pathway, coupled to cyclic nucleotide second messenger (GO:0007187)	0.164131	0.202401	AGT
chemical homeostasis (GO:0048878)	0.164131	0.202401	APOA4
cellular response to nutrient levels (GO:0031669)	0.166437	0.204908	ALB
positive regulation of catabolic process (GO:0009896)	0.168737	0.207061	APOA2
regulation of epidermal growth factor receptor signaling pathway (GO:0042058)	0.168737	0.207061	AGT
positive regulation of protein localization to nucleus (GO:1900182)	0.17103	0.209533	F2
negative regulation of cellular catabolic process (GO:0031330)	0.173318	0.21199	HP
kidney development (GO:0001822)	0.175599	0.214431	AGT
positive regulation of cellular protein localization (GO:1903829)	0.177874	0.216505	F2
negative regulation of neuron apoptotic process (GO:0043524)	0.177874	0.216505	APOE
negative regulation of epithelial cell proliferation (GO:0050680)	0.180143	0.217854	APOE
cell junction organization (GO:0034330)	0.180143	0.217854	C1QA
cell morphogenesis involved in differentiation (GO:0000904)	0.180143	0.217854	FN1
negative regulation of supramolecular fiber organization (GO:1902904)	0.180143	0.217854	APOE
regulation of actin filament-based process (GO:0032970)	0.182406	0.219179	HRG
positive regulation of JNK cascade (GO:0046330)	0.182406	0.219179	SERPINF2
regulation of hydrolase activity (GO:0051336)	0.182406	0.219179	APOA1
defense response to Gram-negative bacterium (GO:0050829)	0.182406	0.219179	F2
positive regulation of programmed cell death (GO:0043068)	0.185689	0.222768	HRG;KNG1
proteolysis (GO:0006508)	0.18668	0.2236	F12;KLKB1
positive regulation of interleukin-6 production (GO:0032755)	0.189157	0.225488	SIGLEC16
cell morphogenesis involved in neuron differentiation (GO:0048667)	0.189157	0.225488	SPTBN4
phospholipid metabolic process (GO:0006644)	0.189157	0.225488	APOA2
positive regulation of tumor necrosis factor production (GO:0032760)	0.191396	0.227434	ORM2
regulation of organelle assembly (GO:1902115)	0.191396	0.227434	GSN
negative regulation of blood vessel morphogenesis (GO:2000181)	0.193628	0.229723	HRG
axon development (GO:0061564)	0.195854	0.231998	SPTBN4
negative regulation of cellular response to growth factor stimulus (GO:0090288)	0.198074	0.234258	AGT
regulation of interleukin-8 production (GO:0032677)	0.200288	0.235763	APOA2
positive regulation of tumor necrosis factor superfamily cytokine production (GO:1903557)	0.200288	0.235763	ORM2
phospholipase C-activating G protein-coupled receptor signaling pathway (GO:0007200)	0.200288	0.235763	AGT
MAPK cascade (GO:0000165)	0.202643	0.238161	SPTBN4;APOA1
negative regulation of cellular process (GO:0048523)	0.203635	0.238953	APOA1;HRG;KNG1
positive regulation of protein catabolic process (GO:0045732)	0.209085	0.244966	APOE
positive regulation of apoptotic process (GO:0043065)	0.209679	0.245278	HRG;KNG1
negative regulation of cellular amide metabolic process (GO:0034249)	0.21127	0.24599	APOE
positive regulation of endothelial cell migration (GO:0010595)	0.21127	0.24599	AGT
regulation of neuron death (GO:1901214)	0.21127	0.24599	C1QA
negative regulation of angiogenesis (GO:0016525)	0.213448	0.248141	HRG
sensory perception of mechanical stimulus (GO:0050954)	0.21562	0.249893	SPTBN4
positive regulation of neuron projection development (GO:0010976)	0.21562	0.249893	APOE
positive regulation of inflammatory response (GO:0050729)	0.217787	0.250856	AGT
collagen fibril organization (GO:0030199)	0.217787	0.250856	SERPINF2
transforming growth factor beta receptor signaling pathway (GO:0007179)	0.217787	0.250856	APOA1
protein import (GO:0017038)	0.217787	0.250856	APOE
regulation of actin cytoskeleton organization (GO:0032956)	0.222102	0.254655	HRG
sensory perception of sound (GO:0007605)	0.222102	0.254655	SPTBN4
positive regulation of supramolecular fiber organization (GO:1902905)	0.222102	0.254655	APOE
regulation of endothelial cell proliferation (GO:0001936)	0.224251	0.256727	APOE
regulation of heart contraction (GO:0008016)	0.226395	0.258786	AGT
negative regulation of cell death (GO:0060548)	0.228532	0.260436	ALB
positive regulation of epithelial cell migration (GO:0010634)	0.228532	0.260436	AGT
protein maturation (GO:0051604)	0.234909	0.267298	F12
negative regulation of neuron death (GO:1901215)	0.237024	0.268484	APOE
regulation of neuron apoptotic process (GO:0043523)	0.237024	0.268484	APOE
regulation of peptidyl-serine phosphorylation (GO:0033135)	0.237024	0.268484	SPTBN4
positive regulation of stress-activated MAPK cascade (GO:0032874)	0.239132	0.270464	SERPINF2
positive regulation of cellular protein metabolic process (GO:0032270)	0.245423	0.276331	AGT
regulation of cell death (GO:0010941)	0.245423	0.276331	HP
cell junction assembly (GO:0034329)	0.245423	0.276331	FN1
steroid metabolic process (GO:0008202)	0.249589	0.280601	GC
regulation of JNK cascade (GO:0046328)	0.251664	0.28251	SERPINF2
regulation of interleukin-6 production (GO:0032675)	0.261951	0.29362	SIGLEC16
regulation of cytoskeleton organization (GO:0051493)	0.266028	0.297745	HRG
positive regulation of metabolic process (GO:0009893)	0.268057	0.29957	JCHAIN
positive regulation of cellular component organization (GO:0051130)	0.270082	0.300046	APOE
response to lipid (GO:0033993)	0.270082	0.300046	APOA4
positive regulation of kinase activity (GO:0033674)	0.270082	0.300046	F2
cellular response to transforming growth factor beta stimulus (GO:0071560)	0.270082	0.300046	APOA1
positive regulation of protein phosphorylation (GO:0001934)	0.27175	0.301453	F2;AGT
positive regulation of cell projection organization (GO:0031346)	0.276122	0.305851	APOE
negative regulation of cell population proliferation (GO:0008285)	0.279929	0.309369	APOD;HRG
positive regulation of cysteine-type endopeptidase activity involved in apoptotic process (GO:0043280)	0.280121	0.309369	GSN
cytoskeleton organization (GO:0007010)	0.282112	0.311111	APOE
positive regulation of macromolecule metabolic process (GO:0010604)	0.285039	0.313878	GSN;FN1
fatty acid metabolic process (GO:0006631)	0.290025	0.318433	PON1
regulation of tumor necrosis factor production (GO:0032680)	0.290025	0.318433	ORM2
regulation of phosphorylation (GO:0042325)	0.291989	0.320122	FN1
negative regulation of cell growth (GO:0030308)	0.293948	0.320865	HRG
negative regulation of growth (GO:0045926)	0.293948	0.320865	HRG
circulatory system development (GO:0072359)	0.293948	0.320865	FN1
plasma membrane bounded cell projection organization (GO:0120036)	0.297851	0.324653	APOE
regulation of primary metabolic process (GO:0080090)	0.301732	0.328407	APOE
cellular response to metal ion (GO:0071248)	0.303665	0.330033	TF
transmembrane receptor protein serine/threonine kinase signaling pathway (GO:0007178)	0.307515	0.333734	APOA1
positive regulation of peptidyl-tyrosine phosphorylation (GO:0050731)	0.309432	0.33533	AGT
protein localization to plasma membrane (GO:0072659)	0.313251	0.338491	SPTBN4
cellular calcium ion homeostasis (GO:0006874)	0.313251	0.338491	F2
neuron projection morphogenesis (GO:0048812)	0.320826	0.345682	SPTBN4
protein localization to cell periphery (GO:1990778)	0.320826	0.345682	SPTBN4
regulation of small GTPase mediated signal transduction (GO:0051056)	0.322707	0.34721	A2M
neuron development (GO:0048666)	0.326453	0.350237	APOE
nitrogen compound transport (GO:0071705)	0.326453	0.350237	HRG
positive regulation of cytosolic calcium ion concentration (GO:0007204)	0.333885	0.3577	KNG1
positive regulation of hydrolase activity (GO:0051345)	0.337571	0.361133	APOA1
brain development (GO:0007420)	0.339406	0.361552	APOD
response to cytokine (GO:0034097)	0.339406	0.361552	ITIH4
regulation of cytokine production (GO:0001817)	0.339406	0.361552	AGT
actin filament organization (GO:0007015)	0.343062	0.364928	GSN
regulation of gene expression (GO:0010468)	0.345138	0.366618	GSN;FN1;APOE;HRG
positive regulation of protein kinase activity (GO:0045860)	0.346698	0.367754	AGT
positive regulation of NF-kappaB transcription factor activity (GO:0051092)	0.348508	0.369095	AGT
nervous system development (GO:0007399)	0.348945	0.369095	GSN;FN1
regulation of cell differentiation (GO:0045595)	0.350314	0.370022	SERPINF2
regulation of cell population proliferation (GO:0042127)	0.351165	0.3704	FN1;HRG;AGT
skeletal system development (GO:0001501)	0.35391	0.37225	AHSG
cellular response to starvation (GO:0009267)	0.35391	0.37225	ALB
heart development (GO:0007507)	0.364583	0.382939	FN1
negative regulation of canonical Wnt signaling pathway (GO:0090090)	0.366345	0.383717	APOE
regulation of neuron projection development (GO:0010975)	0.366345	0.383717	APOE
regulation of MAPK cascade (GO:0043408)	0.368102	0.38502	FN1
neuron projection development (GO:0031175)	0.376815	0.393586	APOE
negative regulation of apoptotic process (GO:0043066)	0.386671	0.40332	ALB;APOE
antigen receptor-mediated signaling pathway (GO:0050851)	0.400591	0.417259	IGLL5
negative regulation of Wnt signaling pathway (GO:0030178)	0.410506	0.426994	APOE
positive regulation of nucleic acid-templated transcription (GO:1903508)	0.411964	0.427918	APOE;AGT
negative regulation of macromolecule metabolic process (GO:0010605)	0.415403	0.430894	APOE
protein localization to membrane (GO:0072657)	0.417026	0.431981	SPTBN4
regulation of angiogenesis (GO:0045765)	0.429855	0.444045	HRG
axon guidance (GO:0007411)	0.429855	0.444045	SPTBN4
positive regulation of intracellular signal transduction (GO:1902533)	0.445217	0.459283	FN1;AGT
positive regulation of protein modification process (GO:0031401)	0.447043	0.460534	F2
cilium organization (GO:0044782)	0.468184	0.481652	GSN
inflammatory response (GO:0006954)	0.471139	0.484029	HP
axonogenesis (GO:0007409)	0.485672	0.498278	SPTBN4
positive regulation of DNA-binding transcription factor activity (GO:0051091)	0.494203	0.506339	AGT
regulation of canonical Wnt signaling pathway (GO:0060828)	0.50398	0.514951	APOE
positive regulation of phosphorylation (GO:0042327)	0.50398	0.514951	F2
positive regulation of cell migration (GO:0030335)	0.525637	0.53635	FN1
plasma membrane bounded cell projection assembly (GO:0120031)	0.537408	0.547617	GSN
chemical synaptic transmission (GO:0007268)	0.572225	0.582305	APOE
cellular macromolecule biosynthetic process (GO:0034645)	0.581691	0.590338	APOE
cilium assembly (GO:0060271)	0.581691	0.590338	GSN
negative regulation of gene expression (GO:0010629)	0.590951	0.598926	APOE
positive regulation of transcription, DNA-templated (GO:0045893)	0.639264	0.647018	SERPINF2;APOE;AGT
negative regulation of programmed cell death (GO:0043069)	0.653302	0.660336	ALB
organelle organization (GO:0006996)	0.689289	0.695774	APOE
organelle assembly (GO:0070925)	0.693629	0.699215	GSN
regulation of intracellular signal transduction (GO:1902531)	0.703803	0.708521	A2M
cellular response to cytokine stimulus (GO:0071345)	0.739087	0.743044	FN1
cytokine-mediated signaling pathway (GO:0019221)	0.823988	0.827293	FN1
positive regulation of transcription by RNA polymerase II (GO:0045944)	0.922616	0.92508	SERPINF2
regulation of transcription by RNA polymerase II (GO:0006357)	0.987447	0.988652	SERPINF2;APOE
regulation of transcription, DNA-templated (GO:0006355)	0.988652	0.988652	APOE;AGT

## Sheet: table9
Table 9. Ratio analysis with differencial expressed proteins
Plasma1	Plasma2	Plasma3		NUAP1	NUAP2	NUAP3		ZFP1	ZFP2	ZFP3		ZWP1	ZWP2	ZWP3		ANOVA p value	Corrected p-value	Protein IDs	Majority protein IDs	Protein names	Gene names			Ratio
#!{C:Group1}Plasma	Plasma	Plasma	média	NUAP	NUAP	NUAP	média	ZFP	ZFP	ZFP	média	ZWP	ZWP	ZWP	média		Benjamini Hockberg							Plasma x NUAP	Log2	Plasms x ZFP	Log2	Plasma x ZWP	Log2	NUP x ZFP	Log2	NUP x ZWP	Log2	ZFP x ZWP	Log2
2.0443e+08	2.161e+08	2.5457e+08	2.25033e+08	2.3914e+06	3.7409e+06	3.1962e+06	3.1095e+06	742080	871480	306990	640183	686860	673150	636520	665510	3.39279e-08	4.81775e-06	P00738;J3QR68;H0Y300;A0A0C4DGL8;P00738-2;J3QLC9;A0A087WU08;H3BS21;J3KRH2;J3KTC3;J3KSV1;J3QQI8;H3BMJ7	P00738;J3QR68;H0Y300;A0A0C4DGL8;P00738-2;J3QLC9;A0A087WU08	Haptoglobin;Haptoglobin alpha chain;Haptoglobin beta chain	HP			72.3696	6.17731	351.514	8.45744	338.137	8.40146	4.8572	2.28012	4.67236	2.22415	0.961944	-0.0559749
2.3386e+08	2.0718e+08	2.9242e+08	2.44487e+08	3.926e+09	3.1931e+09	3.2366e+09	3.4519e+09	6.4323e+08	6.1672e+08	6.3243e+08	6.30793e+08	3.3505e+08	2.2086e+08	2.0665e+08	2.54187e+08	1.57565e-07	1.11871e-05	P02675;D6REL8	P02675;D6REL8	Fibrinogen beta chain;Fibrinopeptide B;Fibrinogen beta chain	FGB			0.0708267	-3.81956	0.387586	-1.36741	0.961839	-0.0561328	5.47232	2.45215	13.5802	3.76343	2.48161	1.31128
3.4787e+08	3.8894e+08	4.7783e+08	4.0488e+08	5.6359e+09	5.039e+09	8.33339e+09	6.3361e+09	1.6376e+09	1.6117e+09	1.4706e+09	1.5733e+09	6.8982e+08	5.9811e+08	4.7289e+08	5.8694e+08	3.68968e-07	1.74645e-05	P02671-2;P02671;A0A087WUA0;CON__P02672	P02671-2;P02671	Fibrinogen alpha chain;Fibrinopeptide A;Fibrinogen alpha chain	FGA			0.0639005	-3.96803	0.257345	-1.95823	0.689815	-0.535718	4.02727	2.0098	10.7951	3.43231	2.68051	1.42251
5.6927e+07	6.0016e+07	6.9022e+07	6.19883e+07	3.4823e+08	3.9599e+08	4.936e+08	4.12607e+08	4.6045e+08	7.93989e+08	6.8771e+08	6.47383e+08	4.3608e+08	5.0641e+08	5.6633e+08	5.0294e+08	1.16403e-06	4.1323e-05	P02649;H0Y7L5;E9PEV4;E7ERP7;CON__Q03247	P02649;H0Y7L5;E9PEV4;E7ERP7	Apolipoprotein E	APOE			0.150236	-2.7347	0.0957521	-3.38455	0.123252	-3.02032	0.637345	-0.649853	0.820389	-0.28562	1.2872	0.364233
4.6456e+06	2.0148e+07	1.0973e+07	1.19222e+07	4.4319e+08	3.7033e+08	3.0607e+08	3.73197e+08	4.3764e+08	3.5986e+08	4.4594e+08	4.1448e+08	7.7936e+08	6.0575e+08	9.1856e+08	7.6789e+08	3.78837e-06	8.50882e-05	P04196	P04196	Histidine-rich glycoprotein	HRG			0.0319462	-4.96821	0.0287642	-5.11958	0.0155259	-6.00918	0.900397	-0.151367	0.486003	-1.04096	0.539765	-0.889597
1.3893e+10	2.1317e+10	1.6185e+10	1.71317e+10	8.58751e+08	6.7502e+08	3.1125e+08	6.15007e+08	4.2328e+08	3.3343e+08	1.8346e+08	3.1339e+08	4.2649e+08	3.609e+08	2.3549e+08	3.4096e+08	3.8437e-06	8.50882e-05	CON__P02768-1;P02768;A0A0C4DGB6;B7WNR0;H0YA55;D6RHD5;A0A087WWT3;P02768-3;C9JKR2;P02768-2;H7C013	CON__P02768-1;P02768;A0A0C4DGB6;B7WNR0;H0YA55;D6RHD5;A0A087WWT3;P02768-3;C9JKR2;P02768-2	Serum albumin	ALB			27.8561	4.79992	54.6656	5.77256	50.2454	5.65092	1.96243	0.972643	1.80375	0.851	0.91914	-0.121643
4.0002e+09	4.6154e+09	3.7234e+09	4.113e+09	7.5082e+09	6.5521e+09	1.0758e+10	8.27277e+09	2.0708e+09	1.6764e+09	2.4254e+09	2.05753e+09	9.4593e+08	7.4364e+08	1.0836e+09	9.2439e+08	4.19449e-06	8.50882e-05	P02647;F8W696	P02647;F8W696	Apolipoprotein A-I;Proapolipoprotein A-I;Truncated apolipoprotein A-I	APOA1			0.497173	-1.00818	1.999	0.999276	4.44942	2.15362	4.02072	2.00746	8.94944	3.1618	2.22583	1.15434
1.1655e+08	1.9248e+07	2.0941e+07	5.22463e+07	1.7831e+09	1.8598e+09	1.5241e+09	1.72233e+09	6.0522e+09	9.74059e+09	3.9991e+09	6.5973e+09	4.0285e+09	8.325e+09	4.5624e+09	5.63863e+09	1.61422e-05	0.000286524	P04114;A8MUN2;A0A669KB70	P04114	Apolipoprotein B-100;Apolipoprotein B-48	APOB			0.0303346	-5.04289	0.00791935	-6.9804	0.00926578	-6.75387	0.261067	-1.93751	0.305452	-1.71098	1.17002	0.226529
3.4102e+08	2.4031e+08	1.8258e+08	2.54637e+08	4.5918e+09	3.1234e+09	4.0952e+09	3.9368e+09	9.7408e+08	8.6158e+08	6.3375e+08	8.23136e+08	5.7448e+08	3.2374e+08	2.427e+08	3.80307e+08	1.91256e-05	0.000301759	P02679-2;P02679;C9JEU5;C9JC84	P02679-2;P02679;C9JEU5;C9JC84	Fibrinogen gamma chain	FGG			0.0646811	-3.95051	0.309349	-1.69269	0.669556	-0.578723	4.78268	2.25782	10.3516	3.37179	2.1644	1.11397
4.5434e+08	9.0737e+08	2.8694e+08	5.4955e+08	5.0522e+06	6.0821e+06	936160	4.02349e+06	2.3416e+06	761030	483770	1.19547e+06	714050	1.497e+06	505630	905560	2.16302e-05	0.000307148	A0A024R6I7;P01009;A0A0G2JRN3;P01009-2;P01009-3;G3V2B9;G3V544;G3V5R8;G3V387;A0A0B4J278	A0A024R6I7;P01009;A0A0G2JRN3;P01009-2;P01009-3	Alpha-1-antitrypsin;Short peptide from AAT	SERPINA1			136.586	7.09366	459.695	8.84453	606.862	9.24522	3.36562	1.75087	4.44309	2.15156	1.32014	0.400692
7.4916e+06	3.3325e+06	3.9091e+06	4.91106e+06	4.2723e+07	3.7035e+07	2.4489e+07	3.4749e+07	1.1152e+08	1.3644e+08	1.8726e+08	1.45073e+08	1.7404e+09	2.2766e+08	5.8286e+08	8.50307e+08	4.39444e-05	0.000567282	P02747	P02747	Complement C1q subcomponent subunit C	C1QC			0.14133	-2.82286	0.0338523	-4.8846	0.00577564	-7.4358	0.239527	-2.06174	0.0408664	-4.61294	0.170613	-2.5512
			#DIV/0!	1.0253e+07	1.0142e+07	8.5692e+06	9.65473e+06	3.5563e+06	5.434e+06	4.3793e+06	4.45653e+06	2.2854e+06	1.9393e+06	2.2986e+06	2.17443e+06	5.13402e-05	0.000607526	P27169;F8WF42	P27169	Serum paraoxonase/arylesterase 1	PON1			#DIV/0!	#DIV/0!	#DIV/0!	#DIV/0!	#DIV/0!	#DIV/0!	2.16642	1.11531	4.44011	2.1506	2.04951	1.03528
4.5054e+07	1.0431e+08	1.0467e+08	8.4678e+07	191400	129750	1.0343e+06	451817	441750	1.1854e+06		813575	380770	249060	170730	266853	8.12815e-05	0.000887844	D6RF35;P02774;P02774-3;P02774-2;D6RBJ7;CON__Q3MHN5;CON__ENSEMBL:ENSBTAP00000018229;D6RF20	D6RF35;P02774;P02774-3;P02774-2;D6RBJ7	Vitamin D-binding protein	GC			187.417	7.55011	104.081	6.70157	317.32	8.3098	0.555347	-0.848538	1.69313	0.75969	3.04877	1.60823
347040	330370	642780	440064	670190	2.293e+06		1.4816e+06	1.7757e+07	1.8688e+07	1.3024e+07	1.64897e+07	9.4619e+07	3.0031e+07	2.093e+07	4.85267e+07	9.82334e-05	0.000996367	A0A3B3ISR2;B4DPQ0;P00736;F5H2D0;A0A3B3ITU4;F5H1V0;F5H6Y3	A0A3B3ISR2;B4DPQ0;P00736;F5H2D0;A0A3B3ITU4	Complement C1r subcomponent;Complement C1r subcomponent heavy chain;Complement C1r subcomponent light chain	C1R			0.29702	-1.75137	0.0266872	-5.22771	0.00906849	-6.78492	0.0898499	-3.47634	0.0305316	-5.03355	0.339806	-1.55722
1.6077e+07	9.916e+06	8.4898e+06	1.14943e+07	1.0339e+06	1.4406e+06	871020	1.11517e+06	1.2354e+06	1.7135e+06	3.0192e+06	1.98937e+06	8.69561e+06	4.5501e+06	6.1057e+06	6.45047e+06	0.000133467	0.00126349	A0A286YEY4;P01859	A0A286YEY4;P01859	Ig gamma-2 chain C region	IGHG2			10.3072	3.36558	5.77786	2.53053	1.78193	0.833439	0.560567	-0.835041	0.172883	-2.53214	0.308407	-1.69709
4.719e+06	6.7233e+06	3.2812e+06	4.90783e+06	4.5443e+07	7.2081e+07	2.4844e+07	4.7456e+07	3.0811e+07	5.7374e+07	2.8784e+07	3.89897e+07	1.2174e+08	7.3456e+07	6.0909e+07	8.53683e+07	0.000159564	0.00141613	P01042	P01042	Kininogen-1;Kininogen-1 heavy chain;T-kinin;Bradykinin;Lysyl-bradykinin;Kininogen-1 light chain;Low molecular weight growth-promoting factor	KNG1			0.103419	-3.27343	0.125875	-2.98993	0.0574901	-4.12054	1.21714	0.283499	0.555897	-0.84711	0.456723	-1.13061
1.3495e+08	6.5076e+07	8.0115e+07	9.33804e+07	6.5282e+07	4.4784e+07	5.7601e+07	5.5889e+07	2.0603e+07	1.719e+07	1.3185e+07	1.69927e+07	1.1397e+07	1.2561e+07	4.7395e+06	9.56583e+06	0.000169572	0.00141643	P06727	P06727	Apolipoprotein A-IV	APOA4			1.67082	0.740555	5.49533	2.45821	9.76187	3.28716	3.28901	1.71765	5.84257	2.5466	1.77639	0.82895
5.9543e+06	4.7739e+06	1.2573e+07	7.76707e+06	3.8491e+07	7.7849e+07	5.7855e+07	5.8065e+07	4.7803e+07	4.6268e+07	3.6882e+07	4.3651e+07	6.8912e+07	6.7804e+07	4.0826e+07	5.91807e+07	0.000218075	0.00163053	A0A4W9A917;A0A286YES1;P01860	A0A4W9A917;A0A286YES1;P01860	Ig gamma-3 chain C region	IGHG3			0.133765	-2.90223	0.177936	-2.49057	0.131243	-2.92968	1.33021	0.411654	0.981147	-0.0274582	0.737588	-0.439112
			#DIV/0!	6.0651e+07	6.2587e+07	6.9149e+07	6.4129e+07	1.0603e+08	1.2586e+08	1.6868e+08	1.33523e+08	2.9524e+08	2.121e+08	2.4059e+08	2.4931e+08	0.00021817	0.00163053	P02745;X6RLJ0	P02745;X6RLJ0	Complement C1q subcomponent subunit A	C1QA			#DIV/0!	#DIV/0!	#DIV/0!	#DIV/0!	#DIV/0!	#DIV/0!	0.480283	-1.05804	0.257226	-1.95889	0.535571	-0.900849
7.3075e+07	9.0057e+07	4.3052e+07	6.8728e+07	3.1856e+08	1.2559e+08	4.0343e+08	2.82527e+08	3.4566e+07	3.7572e+07	4.5073e+07	3.90703e+07	2.2526e+07	1.1138e+07	1.9403e+07	1.7689e+07	0.000290704	0.002064	V9GYM3;P02652;V9GYE3;V9GYG9;V9GYC1;V9GYS1	V9GYM3;P02652;V9GYE3;V9GYG9;V9GYC1;V9GYS1	Apolipoprotein A-II;Proapolipoprotein A-II;Truncated apolipoprotein A-II	APOA2			0.243262	-2.03942	1.75908	0.814825	3.88536	1.95805	7.23123	2.85424	15.9719	3.99746	2.20874	1.14322
6.4794e+06	668260	2.682e+06	3.27655e+06	1.0054e+08	9.3629e+07	1.0993e+08	1.01366e+08	8.6686e+07	1.537e+08	2.686e+08	1.69662e+08	9.1613e+08	1.2416e+08	7.4218e+08	5.94157e+08	0.000307419	0.00207874	D6R934;P02746;A0A0A0MSV6;D6RGJ1	D6R934;P02746;A0A0A0MSV6	Complement C1q subcomponent subunit B	C1QB			0.0323239	-4.95126	0.0193122	-5.69434	0.00551463	-7.50252	0.59746	-0.743085	0.170605	-2.55126	0.285551	-1.80818
1.7798e+06			1.7798e+06	1.3783e+07	1.2131e+07	1.7851e+07	1.45883e+07	3.8937e+07	2.7839e+07	4.0626e+07	3.58007e+07	1.241e+08	8.9855e+07	6.4672e+07	9.28757e+07	0.000337535	0.00215707	H0YAC1;P03952;E9PBC5;C9JCT1;C9J075	H0YAC1;P03952;E9PBC5	Plasma kallikrein;Plasma kallikrein heavy chain;Plasma kallikrein light chain	KLKB1			0.122001	-3.03503	0.0497141	-4.3302	0.0191632	-5.70551	0.407488	-1.29517	0.157074	-2.67049	0.385469	-1.37531
1.0738e+08	4.5702e+07	8.9125e+07	8.07357e+07	159590		159330	159460				#DIV/0!				#DIV/0!	0.000349385	0.00215707	A0A087WT59;P02766	A0A087WT59;P02766	Transthyretin	TTR			506.307	8.98387	#DIV/0!	#DIV/0!	#DIV/0!	#DIV/0!	#DIV/0!	#DIV/0!	#DIV/0!	#DIV/0!	#DIV/0!	#DIV/0!
1.6089e+07	1.436e+07	8.0602e+06	1.28364e+07	7.5729e+07	8.7783e+07	6.6194e+07	7.65687e+07	5.5074e+07	4.9034e+07	2.8432e+07	4.418e+07	5.2863e+07	6.404e+07	3.579e+07	5.08977e+07	0.000460959	0.00261706	P06396;A0A0A0MS51;A0A0A0MT01;P06396-2;P06396-4;P06396-3;CON__Q3SX14;Q5T0I0;A0A0U1RQL8;REV__H0YJM7;REV__A0A6Q8PG26;REV__Q6TDU7-4;REV__Q6TDU7-2;REV__Q6TDU7-3;REV__Q6TDU7;REV__F8W8F9	P06396;A0A0A0MS51;A0A0A0MT01;P06396-2;P06396-4;P06396-3;CON__Q3SX14	Gelsolin	GSN			0.167646	-2.57651	0.290548	-1.78315	0.2522	-1.98736	1.73311	0.793361	1.50437	0.589155	0.868016	-0.204206
5.2132e+08	5.968e+08	6.0919e+08	5.7577e+08	1.0087e+07	513400	263750	3.62138e+06	2.1227e+06	575020	434610	1.04411e+06	763820		414320	589070	0.000472475	0.00261706	P02787;F8WCI6;H7C5E8;C9JB55;F8WEK9;C9JVG0;F8WC57	P02787	Serotransferrin	TF			158.992	7.31281	551.446	9.10707	977.422	9.93284	3.46839	1.79427	6.14763	2.62003	1.77247	0.825763
1.4454e+08	1.8894e+08	1.3968e+08	1.5772e+08	1.7363e+07	9.3637e+06	2.1733e+07	1.61532e+07	1.516e+07	1.8838e+07	1.2258e+07	1.54187e+07	6.1508e+07	1.5528e+07	3.2194e+07	3.641e+07	0.00047918	0.00261706	A0A286YEY1;P01876;A0A0G2JMB2;A0A286YEY5;P01877	A0A286YEY1;P01876;A0A0G2JMB2	Ig alpha-1 chain C region	IGHA1			9.76399	3.28747	10.2292	3.35462	4.33178	2.11496	1.04764	0.0671454	0.443648	-1.17251	0.423473	-1.23966
3.8387e+06	7.2936e+06	9.5319e+06	6.88806e+06	8.3035e+07	1.6891e+08	2.4271e+08	1.64885e+08	5.2386e+07	2.0808e+08	9.0119e+07	1.16862e+08	2.6841e+07	7.9714e+07	3.2842e+07	4.64656e+07	0.000697011	0.00366576	A0A096LPE2;P35542	A0A096LPE2;P35542	Serum amyloid A-4 protein	SAA2-SAA4;SAA4			0.041775	-4.58122	0.0589421	-4.08456	0.14824	-2.75399	1.41094	0.496659	3.54854	1.82722	2.51501	1.33056
1.0199e+07	1.3917e+07	1.2112e+07	1.2076e+07	6.9402e+06	2.9703e+06	3.7264e+06	4.54563e+06	1.9022e+06		2.4475e+06	2.17485e+06	1.4458e+06		1.908e+06	1.6769e+06	0.00103695	0.00509013	A0A7P0TAP4;A0A7P0Z441;A0A7P0T9S6;A0A7P0TA52;A0A7P0TBH1;A0A7P0T8D1;P01019	A0A7P0TAP4;A0A7P0Z441;A0A7P0T9S6;A0A7P0TA52;A0A7P0TBH1;A0A7P0T8D1;P01019	Angiotensinogen;Angiotensin-1;Angiotensin-2;Angiotensin-3;Angiotensin-4;Angiotensin 1-9;Angiotensin 1-7;Angiotensin 1-5;Angiotensin 1-4	AGT			2.65662	1.40959	5.55257	2.47315	7.20138	2.84827	2.09009	1.06356	2.71074	1.43868	1.29695	0.375119
6.415e+07	6.7371e+07	5.0028e+07	6.05163e+07	1.4831e+07	1.095e+07	1.1073e+07	1.22847e+07	4.9196e+06	2.5865e+06	3.7054e+06	3.73717e+06	3.221e+07	6.1299e+06	2.9411e+07	2.25836e+07	0.00103953	0.00509013	A0A7I2V2D2;P05155-2;P05155;P05155-3;E9PGN7;H9KV48;A0A087WUD9;A0A7I2V5R3;A0A7I2V2X2;A0A7I2V4I9	A0A7I2V2D2;P05155-2;P05155;P05155-3;E9PGN7;H9KV48;A0A087WUD9;A0A7I2V5R3	Plasma protease C1 inhibitor	SERPING1			4.92617	2.30047	16.1931	4.01731	2.67965	1.42205	3.28716	1.71684	0.543963	-0.878419	0.165481	-2.59526
			#DIV/0!	3.6387e+08	9.4397e+07	2.4949e+08	2.35919e+08	4.1989e+07	5.4606e+07	4.6976e+07	4.7857e+07	2.2962e+07	1.5614e+07	1.539e+07	1.79887e+07	0.00127244	0.00602288	A6NMB1	A6NMB1	Sialic acid-binding Ig-like lectin 16	SIGLEC16			#DIV/0!	#DIV/0!	#DIV/0!	#DIV/0!	#DIV/0!	#DIV/0!	4.92967	2.30149	13.1149	3.71313	2.6604	1.41164
5.8162e+08	2.6183e+08	2.5863e+08	3.6736e+08	5.2994e+07	7.0325e+07	5.0894e+07	5.8071e+07	1.1921e+08	1.487e+08	6.0205e+07	1.09372e+08	1.4372e+08	9.0395e+07	7.2348e+07	1.02154e+08	0.00287874	0.0131865	P0DOY3;P0DOY2;P0CF74;A0A5H1ZRQ7;A0M8Q6	P0DOY3;P0DOY2;P0CF74	Ig lambda-6 chain C region	IGLC6			6.32605	2.6613	3.35882	1.74796	3.59613	1.84644	0.530951	-0.913349	0.568463	-0.814861	1.07065	0.0984883
1.2522e+08	5.5223e+07	3.9744e+07	7.33956e+07	1.6796e+07	9.1926e+06	6.5811e+06	1.08566e+07	2.1859e+07	2.3193e+07	9.6894e+06	1.82471e+07	1.1805e+07	1.0566e+07	1.2481e+07	1.16173e+07	0.0036645	0.0162612	P01023;F8W7L3;H0YFH1;CON__ENSEMBL:ENSBTAP00000024146;P20742-2;P20742	P01023	Alpha-2-macroglobulin	A2M			6.76049	2.75713	4.02231	2.00802	6.31777	2.65942	0.594974	-0.749102	0.934514	-0.0977117	1.57068	0.65139
1.3303e+06	3.2362e+06	1.3499e+06	1.97213e+06	3.3156e+06	4.553e+06	8.405e+06	5.42453e+06	4.2768e+06	5.7002e+06	4.246e+06	4.741e+06	7.4306e+06	1.8242e+07	1.224e+07	1.26375e+07	0.00442781	0.0185502	P35858;P35858-2	P35858;P35858-2	Insulin-like growth factor-binding protein complex acid labile subunit	IGFALS			0.363558	-1.45974	0.415974	-1.26543	0.156054	-2.67989	1.14417	0.194308	0.42924	-1.22014	0.375152	-1.41445
			#DIV/0!	5.8906e+06	4.3226e+06	4.7215e+06	4.97823e+06	1.7053e+07	4.1094e+07		2.90735e+07	1.3818e+07	1.6484e+07	2.0179e+07	1.6827e+07	0.00444159	0.0185502	M0R1V6;M0QZQ3;C9JY79;Q9H254-2;Q9H254-4;Q9H254	M0R1V6;M0QZQ3;C9JY79;Q9H254-2;Q9H254-4;Q9H254	Spectrin beta chain, non-erythrocytic 4	SPTBN4			#DIV/0!	#DIV/0!	#DIV/0!	#DIV/0!	#DIV/0!	#DIV/0!	0.171229	-2.546	0.295848	-1.75707	1.72779	0.788927
6.1023e+08	5.6345e+08	4.3246e+08	5.3538e+08	2.4265e+08	2.2011e+08	2.041e+08	2.22287e+08	2.9077e+08	1.9795e+08	2.9812e+08	2.6228e+08	5.9676e+08	3.424e+08	3.3139e+08	4.23517e+08	0.0049218	0.0199685	P01834;A0A5H1ZRQ3	P01834;A0A5H1ZRQ3	Ig kappa chain C region	IGKC			2.40851	1.26814	2.04125	1.02946	1.26413	0.338144	0.847517	-0.238686	0.524859	-0.929998	0.619291	-0.691312
2.5609e+06	2.4049e+06	2.2874e+06	2.41773e+06	5.6158e+06	9.38169e+06	3.8727e+06	6.29007e+06	5.509e+06	8.0416e+06	2.22e+07	1.19169e+07	2.0966e+07	1.4279e+07	1.1857e+07	1.57007e+07	0.00533361	0.0210381	A0A0J9YY99;P0DP03;P01768;P0DP02;P01772;P01764	A0A0J9YY99;P0DP03;P01768;P0DP02;P01772;P01764	Ig heavy chain V-III region CAM;Ig heavy chain V-III region KOL;Ig heavy chain V-III region 23	IGHV3-23			0.384373	-1.37942	0.202883	-2.30128	0.153989	-2.6991	0.527829	-0.921858	0.400624	-1.31968	0.759004	-0.397821
1.1311e+07	2.15e+07	1.5549e+07	1.612e+07				#DIV/0!	2.0963e+06	381740	259490	912510	481730		977599	729665	0.00625835	0.0240185	P08697;A0A0G2JPA8;P08697-2;C9JMH6;A0A0J9YY65;C9JPV4;A0A0J9YWQ3	P08697;A0A0G2JPA8;P08697-2;C9JMH6;A0A0J9YY65;C9JPV4;A0A0J9YWQ3	Alpha-2-antiplasmin	SERPINF2			#DIV/0!	#DIV/0!	17.6656	4.14287	22.0923	4.46547	#DIV/0!	#DIV/0!	#DIV/0!	#DIV/0!	1.25059	0.322607
1.412e+07	7.109e+06	1.5728e+07	1.2319e+07	3.7592e+06		3.1069e+06	3.43305e+06	1.56e+06	1.956e+06	2.9761e+06	2.16403e+06	2.6887e+06	1.1531e+06	3.7129e+06	2.51823e+06	0.00646589	0.024162	A0A075B6K5;P80748	A0A075B6K5;P80748	Ig lambda chain V-III region LOI	IGLV3-9			3.58835	1.84332	5.69261	2.50909	4.89192	2.2904	1.58641	0.665768	1.36328	0.447079	0.859346	-0.218689
4.631e+06	2.1104e+06	3.8886e+06	3.54333e+06	1.9658e+07	1.3122e+07	1.8337e+07	1.7039e+07	1.2434e+07	6.1173e+06	1.415e+07	1.09004e+07	1.8519e+07	8.91651e+06	3.3378e+07	2.02712e+07	0.0077182	0.0281022	A0A182DWH7;P49908;A0A182DWH8	A0A182DWH7;P49908	Selenoprotein P	SEPP1			0.207954	-2.26566	0.325064	-1.62121	0.174797	-2.51625	1.56315	0.644455	0.840553	-0.250589	0.537731	-0.895043
2.6093e+06	1.282e+06	1.6911e+06	1.8608e+06	9.4901e+06	5.335e+06	2.7137e+07	1.39874e+07	1.2919e+07	8.7266e+06	5.8889e+06	9.17817e+06	3.3403e+06	4.5386e+06	5.3452e+06	4.40803e+06	0.00876753	0.0309704	C9JF17;P05090;C9JX71;F8WBT9	C9JF17;P05090	Apolipoprotein D	APOD			0.133034	-2.91013	0.202742	-2.30228	0.422139	-1.24421	1.52398	0.607847	3.17315	1.66592	2.08215	1.05807
3.4951e+07	6.915e+06	2.7678e+07	2.31813e+07	3.8071e+06	2.3771e+06	1.6571e+06	2.61377e+06	5.6696e+06	3.7558e+06	6.838e+06	5.42113e+06	7.5297e+06	5.7822e+06	8.7391e+06	7.35033e+06	0.00894216	0.0309704	A0A0C4DH90;A0A075B6H7;A0A0C4DH55;P01624	A0A0C4DH90;A0A075B6H7;A0A0C4DH55;P01624	Ig kappa chain V-III region POM	IGKV3OR2-268;IGKV3-7;IGKV3D-7			8.86894	3.14876	4.2761	2.0963	3.15378	1.65708	0.482144	-1.05246	0.355599	-1.49168	0.737536	-0.439214
1.9839e+06	2.3145e+06	1.9017e+06	2.0667e+06	5.6309e+06	3.7233e+06		4.6771e+06	1.7697e+07	4.9484e+06	6.9266e+06	9.85734e+06	2.9365e+07	8.54519e+06	1.3992e+07	1.73007e+07	0.0092791	0.0313722	P07357	P07357	Complement component C8 alpha chain	C8A			0.441876	-1.17829	0.209661	-2.25387	0.119457	-3.06543	0.474479	-1.07558	0.270341	-1.88715	0.569764	-0.811563
2.0431e+07	5.0107e+06	8.0895e+06	1.11771e+07	1.6838e+06	819790		1.25179e+06	2.991e+06	2.6608e+06	2.5938e+06	2.74853e+06		1.9996e+06	1.7271e+06	1.86335e+06	0.0109393	0.0361252	H7C5R1;E9PFZ2;P00450;H7C5N5;CON__ENSEMBL:ENSBTAP00000031900	H7C5R1;E9PFZ2;P00450	Ceruloplasmin	CP			8.92883	3.15847	4.06656	2.02381	5.99837	2.58457	0.455441	-1.13466	0.671798	-0.573901	1.47505	0.560762
1.0208e+07	1.6374e+07	5.8477e+06	1.08099e+07	1.415e+07	9.9274e+06	9.6473e+06	1.12416e+07	6.5074e+06	7.6879e+06	3.875e+06	6.02343e+06	1.4786e+06	4.5775e+06	2.7949e+06	2.95033e+06	0.0142741	0.0460663	Q14624;B7ZKJ8;Q14624-4;Q14624-3;Q14624-2;H7C0L5;CON__Q3T052	Q14624;B7ZKJ8;Q14624-4;Q14624-3;Q14624-2;H7C0L5	Inter-alpha-trypsin inhibitor heavy chain H4;70 kDa inter-alpha-trypsin inhibitor heavy chain H4;35 kDa inter-alpha-trypsin inhibitor heavy chain H4	ITIH4			0.961601	-0.0564904	1.79464	0.843695	3.66396	1.8734	1.86631	0.900185	3.81027	1.92989	2.04161	1.02971
8.4627e+06	8.0474e+07	1.9148e+07	3.60282e+07	814120	631180		722650	68721	1.3585e+06	84324	503848		98042		98042	0.0147802	0.0466397	P01008;CON__P41361	P01008	Antithrombin-III	SERPINC1			49.8557	5.63969	71.5061	6.16	367.478	8.52151	1.43426	0.520308	7.37082	2.88183	5.13911	2.36152
			#DIV/0!	3.4649e+06	1.5798e+06		2.52235e+06		1.6105e+06	2.197e+06	1.90375e+06	8.8281e+06	6.8646e+06	6.0095e+06	7.23407e+06	0.0201096	0.0620775	A0A0A0MRJ7;P12259;CON__Q28107	A0A0A0MRJ7;P12259	Coagulation factor V;Coagulation factor V heavy chain;Coagulation factor V light chain	F5			#DIV/0!	#DIV/0!	#DIV/0!	#DIV/0!	#DIV/0!	#DIV/0!	1.32494	0.405924	0.348677	-1.52004	0.263165	-1.92596
2.0843e+06		1.8832e+06	1.98375e+06	1.4531e+07	4.9083e+06	1.717e+06	7.0521e+06	4.5601e+07	2.215e+07	1.7889e+07	2.85467e+07	7.5662e+06	3.064e+07	1.1511e+07	1.65724e+07	0.0247146	0.0736484	P08519;A0A087WWY0	P08519	Apolipoprotein(a)	LPA			0.281299	-1.82982	0.0694915	-3.84702	0.119702	-3.06248	0.247038	-2.0172	0.425533	-1.23266	1.72254	0.784539
1.8255e+07	1.7977e+07	1.9846e+07	1.86927e+07	5.4268e+06	8.7112e+06	8.4369e+06	7.52497e+06	1.1098e+07	2.4041e+07	1.0066e+07	1.50683e+07	9.7837e+06	7.9461e+06	1.2898e+07	1.02093e+07	0.0248952	0.0736484	A0A0B4J231;B9A064;A0A5H1ZRQ4;P0CG04	A0A0B4J231;B9A064;A0A5H1ZRQ4;P0CG04	Immunoglobulin lambda-like polypeptide 5;Ig lambda-1 chain C regions	IGLL5;IGLC1			2.48409	1.31272	1.24053	0.310953	1.83095	0.872594	0.499389	-1.00176	0.737072	-0.440122	1.47595	0.561641
1.8671e+06	2.8564e+06	3.4192e+06	2.71423e+06	869110	787210		828160	9.3509e+06	5.8767e+06	2.5053e+06	5.91096e+06	4.2797e+06	2.4552e+06	1.509e+06	2.74797e+06	0.0264246	0.0765774	E9PIT3;P00734;CON__P00735;C9JV37	E9PIT3;P00734;CON__P00735	Prothrombin;Activation peptide fragment 1;Activation peptide fragment 2;Thrombin light chain;Thrombin heavy chain	F2			3.27742	1.71256	0.459186	-1.12285	0.987724	-0.01782	0.140106	-2.83541	0.301372	-1.73038	2.15103	1.10503
7.6759e+06	3.7596e+06	5.7828e+06	5.73943e+06	3.1929e+07	2.8799e+07	3.1592e+07	3.07733e+07	1.5877e+07	2.0206e+07	5.3559e+06	1.3813e+07	1.0171e+07	2.425e+07	5.4957e+06	1.33056e+07	0.0300366	0.085304	P02751-10;P02751-5;P02751-9;P02751-14;P02751-13;P02751-8;P02751-17;P02751-3;P02751-1;P02751-7;P02751;P02751-12;P02751-6;P02751-11;P02751-4;H0Y7Z1;P02751-16;P02751-2	P02751-10;P02751-5;P02751-9;P02751-14;P02751-13;P02751-8;P02751-17;P02751-3;P02751-1;P02751-7;P02751;P02751-12;P02751-6;P02751-11;P02751-4	Fibronectin;Anastellin;Ugl-Y1;Ugl-Y2;Ugl-Y3	FN1			0.186507	-2.4227	0.415511	-1.26704	0.431356	-1.21305	2.22786	1.15566	2.31282	1.20965	1.03813	0.0539935
1.1523e+07	7.0533e+07	6.2957e+07	4.83377e+07	7.7245e+06		6.9459e+06	7.3352e+06	1.3288e+07	1.7899e+06	1.7067e+06	5.59486e+06	6.5918e+06	2.8006e+06	2.8412e+06	4.07787e+06	0.0397258	0.110609	P02765;C9JV77	P02765;C9JV77	Alpha-2-HS-glycoprotein;Alpha-2-HS-glycoprotein chain A;Alpha-2-HS-glycoprotein chain B	AHSG			6.58982	2.72024	8.63965	3.11097	11.8537	3.56726	1.31106	0.390733	1.79878	0.847022	1.37201	0.456289
		3.4486e+06	3.4486e+06	1.3669e+07	1.3662e+07	9.9148e+06	1.24153e+07	1.2935e+06		3.3677e+06	2.3306e+06	1.3561e+07	4.9368e+06	3.6834e+06	7.39374e+06	0.041236	0.112606	P00748	P00748	Coagulation factor XII;Coagulation factor XIIa heavy chain;Beta-factor XIIa part 1;Coagulation factor XIIa light chain	F12			0.277771	-1.84803	1.4797	0.565309	0.466422	-1.10029	5.32707	2.41334	1.67916	0.74774	0.315213	-1.6656
5.484e+06	3.4813e+06	5.9971e+06	4.98747e+06			1.584e+06	1.584e+06	2.378e+06	1.7346e+06	2.2038e+06	2.10547e+06	4.3883e+06	2.576e+06	1.8653e+06	2.9432e+06	0.0428794	0.114884	C9JA05;D6RHJ6;D6RD17;P01591	C9JA05;D6RHJ6;D6RD17;P01591	Immunoglobulin J chain	JCHAIN;IGJ			3.14865	1.65474	2.36882	1.24417	1.69457	0.760921	0.752327	-0.410568	0.538189	-0.893814	0.715366	-0.483246
			#DIV/0!	4.4447e+06	2.2243e+06	4.6997e+06	3.78957e+06	7.1918e+06	4.8284e+06	5.4131e+06	5.8111e+06	4.0709e+07	9.91e+06	9.0954e+06	1.99048e+07	0.0457492	0.120303	F5GY80;F5H7G1;P07358	F5GY80;F5H7G1;P07358	Complement component C8 beta chain	C8B			#DIV/0!	#DIV/0!	#DIV/0!	#DIV/0!	#DIV/0!	#DIV/0!	0.652126	-0.616778	0.190385	-2.39301	0.291945	-1.77623
1.6919e+07	1.5389e+07	7.2303e+07	3.48703e+07		3.8684e+06		3.8684e+06				#DIV/0!	2.6766e+06		3.7474e+06	3.212e+06	0.0481368	0.12428	P19652	P19652	Alpha-1-acid glycoprotein 2	ORM2			9.01415	3.17219	#DIV/0!	#DIV/0!	10.8563	3.44046	#DIV/0!	#DIV/0!	1.20436	0.268264	#DIV/0!	#DIV/0!

## Sheet: table10
Table 10 . Hierarchical clustering
Distance: Euclidian
Linkage: Average

[truncated: 2 more sheets: 20-total, Tabela SI]
